# Supplementary material for: Diastereodivergent synthesis of 4-oxocyclohexanecarbaldehydes by using the modularly designed organocatalysts upon switching on their iminium catalysis
Source: Royal Society of Chemistry journal article supplement (doi:10.1039/d1cc01020d), 2021-01-01
Supplement: d1cc01020d1.pdf [file d1cc01020d1.pdf]

**Diastereodivergent synthesis of 4-oxocyclohexanecarbaldehydes by using the modularly designed organocatalysts upon switching on their iminium catalysis**

Pranjal Bora, Satish Jakkampudi, Ramarao Parella, Nagaraju Sakkani, Qipu Dai,  
Manisha Bihani, Hadi D. Arman, John C.-G. Zhao\*

Department of Chemistry  
University of Texas at San Antonio

**Supporting Information**

**Table of Contents**

|                                                                   |             |
|-------------------------------------------------------------------|-------------|
| <b>1. General Information .....</b>                               | <b>S-1</b>  |
| <b>2. Detailed Experimental Procedures.....</b>                   | <b>S-1</b>  |
| <b>3. Full Results of Catalyst Screen and Optimizations .....</b> | <b>S-9</b>  |
| <b>4. ORTEP Drawing of the Reaction Products.....</b>             | <b>S-15</b> |
| <b>5. Mechanistic Study and Proposed Mechanisms .....</b>         | <b>S-17</b> |
| <b>6. Compound Characterization Data .....</b>                    | <b>S-24</b> |
| <b>7. Additional References.....</b>                              | <b>S-40</b> |
| <b>8. NMR Spectra .....</b>                                       | <b>S-41</b> |
| <b>9. HPLC Chromatograms .....</b>                                | <b>S-76</b> |

## 1. General Information

Unless otherwise specified, all reactions were conducted in 17 × 60 mm glass vials and monitored by TLC on silica gel plates (200 μm) and visualized by UV. Column chromatography was performed on silica gel (32-63 μ). <sup>1</sup>H NMR spectra was recorded on a 500 MHz or a 300 MHz spectrometer (126 MHz or 75 MHz for <sup>13</sup>C NMR). Infrared spectra were measured on a Bruker Vector 22 instrument. Enantiomeric excesses (ee) were determined by chiral HPLC analysis using a Shimadzu instrument. ChiralPak IC, ID, IB, AD-H, and OD-H columns (4.6 mm × 250 mm) were purchased from Daicel Chemical Industries. Melting points were recorded on MEL-TEMP melting point apparatus in open capillaries and uncorrected. HRMS were conducted by the RCMI Core Facilities, Department of Chemistry, UTSA. Unless specified below, all chemicals are commercial products and were used as received. All the catalysts used in this study are known compounds and were synthesized according to the literature procedures.<sup>15</sup> Toluene was dried over sodium metal under argon atmosphere and distilled before prior to use. Ethanol was dried over magnesium turnings under argon atmosphere and distilled before prior to use.

## 2. Detailed Experimental Procedures

### General Procedure for the Purification of *trans*-Cinnamaldehydes

Since *trans*-cinnamic acid was found to be an activator in our reaction and the corresponding acid may be present in commercial samples of *trans*-cinnamaldehydes as an impurity (formed through air oxidation of the aldehyde), the commercial samples were carefully purified before we put them into the reaction: *trans*-Cinnamaldehyde (5.0 g) was dissolved in dichloromethane (30 mL) and washed with 0.1 N NaOH solution (5 mL). Then dichloromethane solution was washed with brine solution (3 × 5 mL) and dried over anhydrous Na<sub>2</sub>SO<sub>4</sub>. The solution was filtered and concentrated under reduced pressure. The crude *trans*-cinnamaldehyde obtained was then further purified by fractional distillation under reduced pressure and was obtained as a colorless oil. The purity of the fraction collected was verified with <sup>1</sup>H NMR. The freshly distilled *trans*-cinnamaldehyde was used directly for the reactions.

### Procedure for the Purification of Acetone

To acetone (200 mL) was added 1 M NaOH solution (2 mL) and the mixture was shaken for 10 min to quench any acidic impurities present in acetone. Then anhydrous CaSO<sub>4</sub> was added to the mixture, which was vigorously stirred for 2 h. The mixture was filtered through Celite and distilled under N<sub>2</sub> atmosphere to yield pure acetone. The distilled acetone was stored under N<sub>2</sub> in a flask covered with aluminum foil.

### General Procedure for the Synthesis of Diastereomer 7

A mixture of **9a** (7.2 mg, 0.010 mmol) and **10a** (L-proline, 1.1 mg, 0.010 mmol) in freshly distilled EtOH (1.0 mL) was stirred for 15 min. at room temperature. Then acetone (**6a**, 0.10 mL, 1.29 mmol) was added and the mixture was further stirred for 10 min. at room temperature. The reaction mixture was cooled to -5 °C and after 5 min.  $\alpha$ ,  $\beta$ -unsaturated aldehyde **1** (0.10 mmol) and *trans*-cinnamic acid (**11a**, 1.5 mg, 0.010 mmol) were added. The reaction mixture was further stirred at -5 °C until the complete consumption of  $\alpha$ ,  $\beta$ -unsaturated aldehyde **1** (TLC monitoring). After the completion of the reaction, the solvent was evaporated in a rotary evaporator under reduced pressure and the crude product obtained was purified by flash column chromatography using 70:30 to 95:5 hexane/EtOAc as an eluent.

### General Procedure for the Synthesis of Diastereomer 7'

A mixture of **9e** (QDT, 5.9 mg, 0.010 mmol) and **10a** (L-proline, 1.1 mg, 0.010 mmol) in freshly distilled toluene (0.5 mL) was stirred for 15 min. at room temperature. Then acetone (**6a**, 0.10 mL, 1.29 mmol) was added and the mixture was further stirred for 10 min. at room temperature. The reaction mixture was cooled to 0 °C and after 5 min.  $\alpha$ ,  $\beta$ -unsaturated aldehyde **1** (0.10 mmol) and *trans*-cinnamic acid (**11a**, 1.5 mg, 0.010 mmol) were added. The reaction mixture was further stirred at 0 °C until the complete consumption of  $\alpha$ ,  $\beta$ -unsaturated aldehyde **1** (TLC monitoring). After the completion of the reaction, the solvent was evaporated in a rotary evaporator under reduced pressure and the crude product obtained was purified by flash column chromatography using 70:30 to 95:5 hexane/EtOAc as an eluent.

### Synthesis of Compound 12

Compound **12** was obtained as a yellow solid in 60% yield (10.3 mg) from the reaction of *trans*-cinnamaldehyde (**1a**) and acetone (**6a**) by following the general procedure for synthesizing diastereomer **7**, except that the reaction was conducted in toluene (1.0 mL) at rt for 24 h without adding *trans*-cinnamic acid. This compound has identical spectroscopic data as the authentic sample synthesized below.

### Synthesis of Compound 14

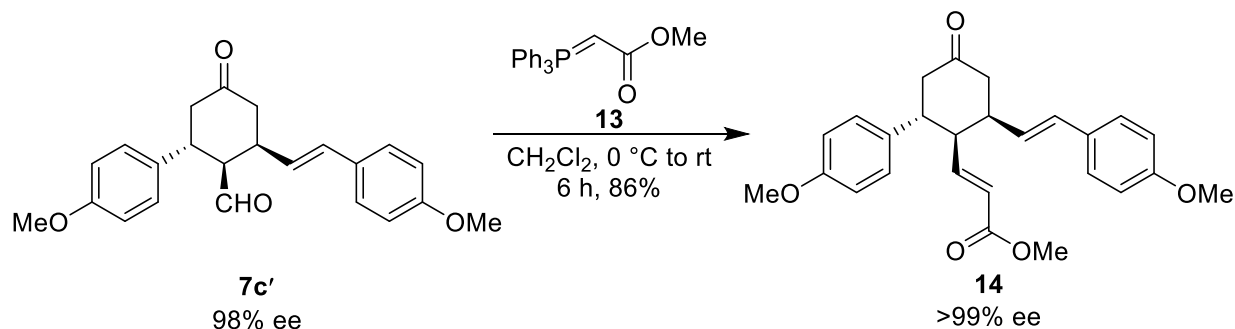

Methyl (triphenylphosphoranylidene)acetate (**13**, 25.0 mg, 0.075 mmol) was added in one portion to a solution of **7c'** (9.0 mg, 0.025 mmol, 98% ee) in anhydrous dichloromethane (1.0 mL) at 0 °C with stirring. The reaction mixture allowed to warm up to room temperature slowly. After 6 h, the solvent was evaporated in a rotary evaporator under reduced pressure and the crude product obtained was purified by flash column chromatography using 80:20 to 95:5 hexane/EtOAc as an eluent. The desired product was obtained **14** as a white solid (9.0 mg, 86% yield, >99% ee).

### Synthesis of Compound 15

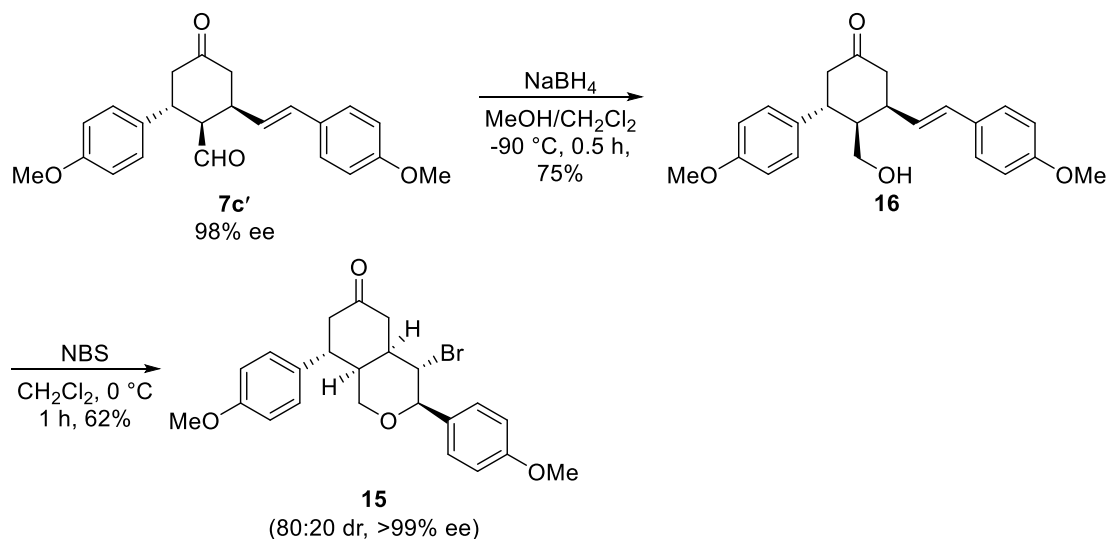



NaBH<sub>4</sub> (2.59 mg, 0.068 mmol) was added in one portion to a solution of **7c'** (10.0 mg, 0.027 mmol, 98% ee) in anhydrous MeOH/CH<sub>2</sub>Cl<sub>2</sub> (1:1, 2.0 mL) at -90 °C with stirring. The reaction mixture was stirred at this temperature for 0.5 h. Then the reaction was quenched with excessive acetaldehyde and the solvent was evaporated in a rotary evaporator under reduced pressure. The crude product obtained was purified by flash column chromatography using 60:40 to 90:10 hexane/EtOAc as an eluent. The desired selective reduction product **16** was obtained as a colorless oil (7.5 mg, 75% yield).

Compound **15** was achieved by treatment of **16** with NBS in dichloromethane: NBS (8.5 mg, 0.0478 mmol) was added in one portion to a solution of **16** (14.0 mg, 0.038 mmol) in anhydrous dichloromethane (1.0 mL) at 0 °C with stirring. The reaction mixture was stirred at the same temperature for 1 h. Then the solvent was evaporated in a rotary evaporator under reduced pressure and the crude product obtained was purified by flash column chromatography using 80:20 to 95:5 hexane/EtOAc as an eluent. The desired product was obtained **15** as a colorless oil (10.5 mg, 62% yield, 80:20 dr, >99% ee). The structure of the major diastereomer was confirmed by HSQC, HMBC, and COSY experiments.

## Synthesis of Compounds for Mechanistic Studies

### a) Synthesis of Compound **12**<sup>16</sup>

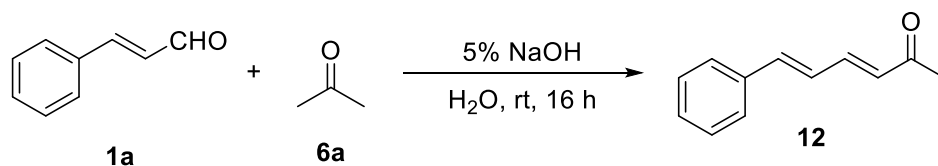

An authentic sample of compound **12** was synthesized by following the literature procedure: To a solution of *trans*-cinnamaldehyde (**1a**, 1.32 g, 10 mmol) in acetone (**6a**, 638 mg, 11 mmol) and EtOH (10 mL) was added dropwise 5% aqueous NaOH solution (10 mL) slowly at room temperature. After stirring at room temperature for 16 h, the pH value was adjusted to 6-7 with 10% HCl, and the resulting solution was extracted with CH<sub>2</sub>Cl<sub>2</sub> (20 mL × 3). The combined organic phase was washed with saturated brine before dried over anhydrous Na<sub>2</sub>SO<sub>4</sub>, and the concentration was conducted under vacuum. The crude product obtained was purified by flash column chromatography using 90:10 to 95:05 hexane/EtOAc as an eluent. Compound **12** was obtained as a yellow solid (980 mg, 57% yield).

## b) Synthesis of Compound 17<sup>17</sup>

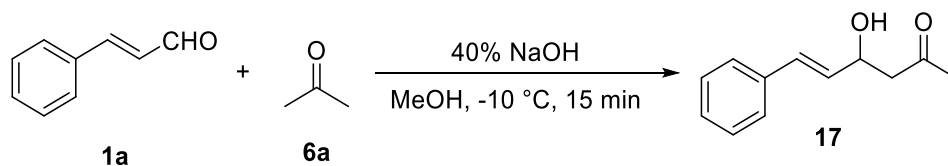

The aldol product was synthesized according to the literature procedure: A stirred solution of acetone (**6a**, 726 mg, 12.5 mmol) and *trans*-cinnamaldehyde (**1a**, 1.65 g, 12.5 mmol) in methanol (10 mL) was treated at -10 °C with aqueous sodium hydroxide (40%, 0.1 mL). After 15 min the slightly yellow solution was poured into excess ice/water containing acetic acid (0.2 mL). The reaction mixture was extracted with a mixture of ethyl acetate/hexane (2:1). The organic phase was washed with saturated NaHCO<sub>3</sub> solution and dried with sodium sulfate. The residue obtained upon evaporation of the solvent was chromatographed with increasing amounts of ethyl acetate in hexane, affording desired aldol product **17** (400 mg, 17% yield).

## Procedures for Mechanistic Studies

a)

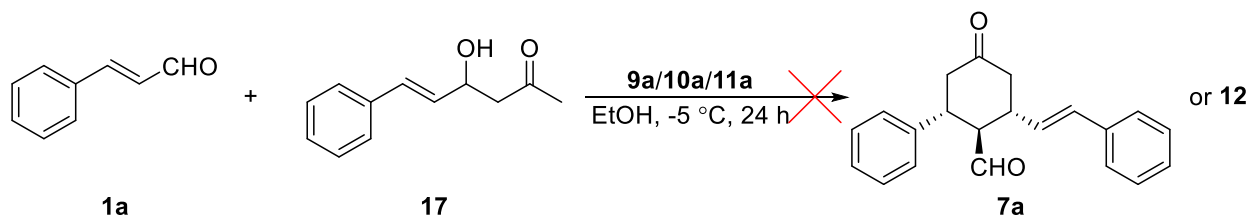

A mixture of **9a** (7.2 mg, 0.010 mmol) and **10a** (L-proline, 1.1 mg, 0.010 mmol) in freshly distilled EtOH (1.0 mL) was stirred for 15 min. at room temperature. Then compound **17** (19.0 mg, 0.10 mmol) was added and the mixture was further stirred for 10 min. at room temperature. The reaction mixture was cooled to -5 °C. After 5 min., *trans*-cinnamaldehyde (**1a**, 19.8 mg, 0.15 mmol) and **11a** (*trans*-cinnamic acid, 1.5 mg, 0.01 mmol) were added. The reaction mixture was stirred at -5 °C for 24 h. No reaction was observed and the expected formation of the desired product **7a** or the condensation product **12** did not happen.

b)

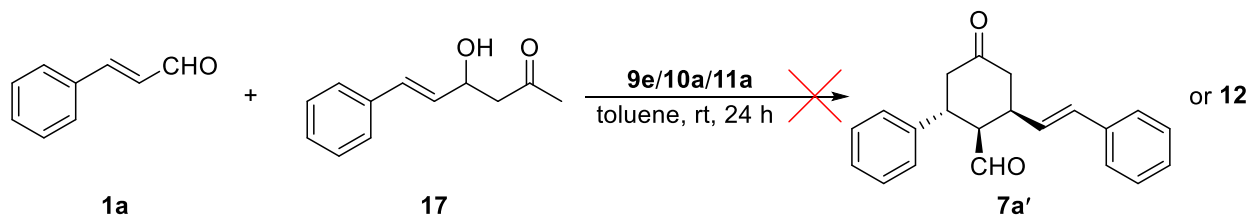

A mixture of **9e** (QDT, 5.94 mg, 0.010 mmol) and **10a** (L-proline, 1.1 mg, 0.010 mmol) in freshly distilled toluene (0.5 mL) was stirred for 15 min. at room temperature. Then compound **17** (19.0 mg, 0.10 mmol) was added the mixture was further stirred for 10 min. at room temperature. Then *trans*-cinnamaldehyde (**1a**, 19.8 mg, 0.15 mmol) and **11a** (*trans*-cinnamic acid, 1.5 mg, 0.010 mmol) were added. The reaction mixture was stirred at room temperature for 24 h. No reaction was observed and the expected formation of the desired product **7a'** or the condensation product **12** did not happen.

c)

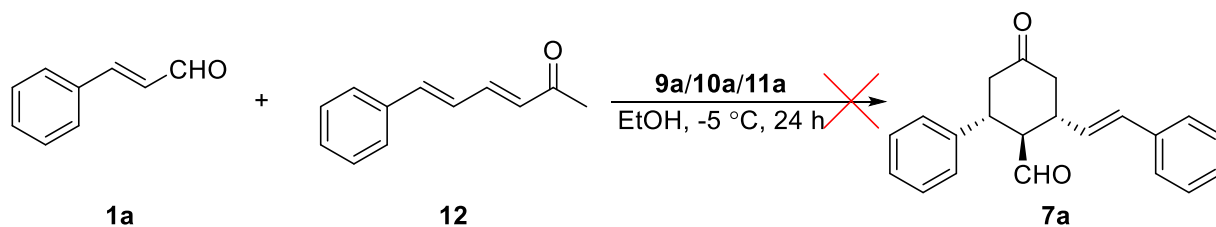

A mixture of **9a** (7.2 mg, 0.010 mmol) and **10a** (L-proline, 1.1 mg, 0.010 mmol) in freshly distilled EtOH (1.0 mL) was stirred for 15 min. at room temperature. Then compound **12** (17.2 mg, 0.10 mmol) was added and the mixture was further stirred for 10 min. at room temperature. The reaction mixture was cooled to -5 °C. After 5 min., *trans*-cinnamaldehyde (**1a**, 19.8 mg, 0.15 mmol) and **11a** (*trans*-cinnamic acid, 1.5 mg, 0.010 mmol) were added. The reaction mixture was further stirred at -5 °C for 24 h. No reaction was observed and the expected formation of the desired product **7a** did not happen.

d)

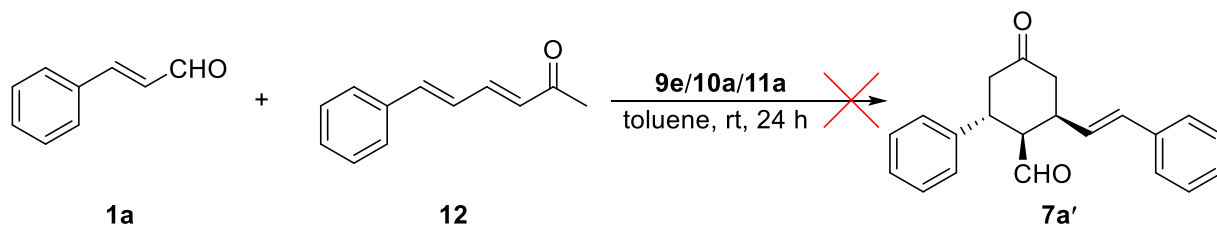

A mixture of **9e** (QDT, 5.94 mg, 0.010 mmol) and **10a** (L-proline, 1.1 mg, 0.010 mmol) in freshly distilled toluene (0.5 mL) was stirred for 15 min. at room temperature. Then compound **12** (17.2 mg, 0.1 mmol) was added and the mixture was further stirred for 10 min. at room temperature. *trans*-Cinnamaldehyde (**1a**, 19.8 mg, 0.15 mmol) and **11a** (*trans*-cinnamic acid, 1.5 mg, 0.010 mmol) were added, and the reaction mixture was further stirred at room temperature for 24 h. No reaction was observed and the expected formation of the desired product **7a'** did not happen.

**e) QDT-catalyzed decarboxylation of the iminium intermediate formed from L-2-chlorophenylglycine and trapping the 1,3-dipolar intermediate**

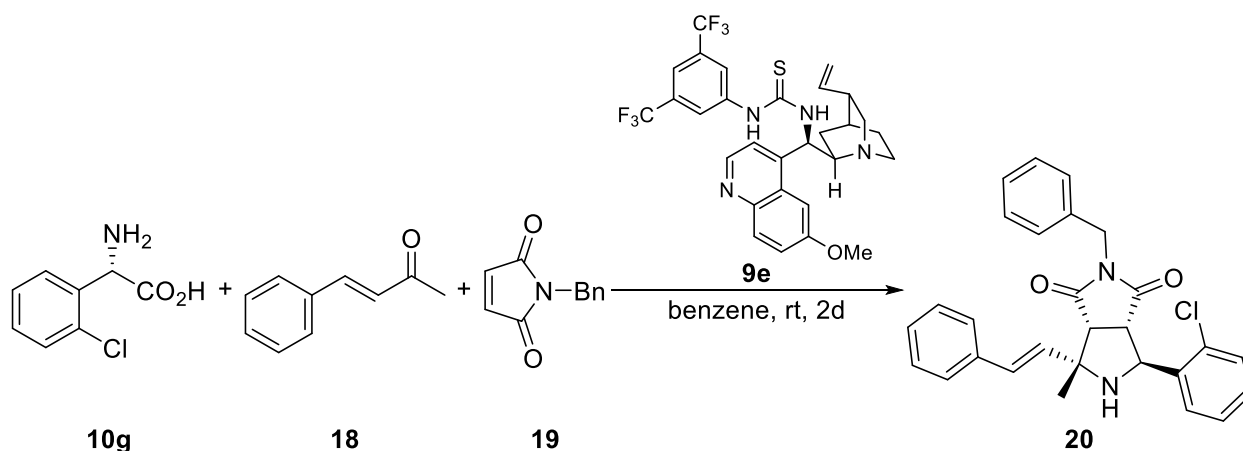

A solution of *trans*-4-phenyl-but-3-en-2-one (**18**, 29.2 mg, 0.20 mmol), 2-chlorophenylglycine (**10g**, 37.2 mg, 0.20 mmol), *N*-benzylmaleimide (**19**, 37.4 mg, 0.20 mmol) and QDT (**9e**, 23.8 mg, 0.040 mmol) in benzene (0.4 mL) were stirred at rt for 2 d (The progress of the reaction was monitored by TLC). After the reaction was completed, the volatile components were removed under reduced pressure and the residue was purified by column chromatography on silica gel (1:5 EtOAc/hexane as the eluent) to afford the cycloaddition product **20** as almost racemic mixture (70.4 mg, 77% yield, 3% ee according to HPLC analysis). The relative stereochemistry of this compound was determined by X-ray crystallography (CCDC deposition No. **859678**).

**f) Trapping the 1,3-dipolar intermediate formed through a DABCO-induced decarboxylation of the iminium intermediate of L-2-chlorophenylglycine**

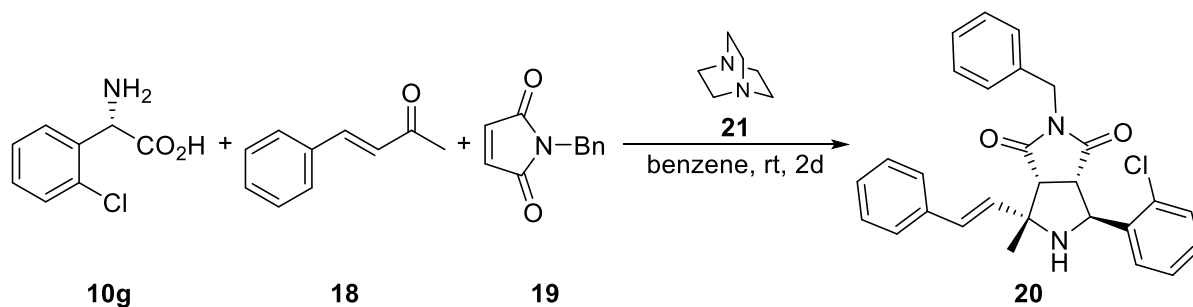

A solution of *trans*-4-phenyl-but-3-en-2-one (**18**, 29.2 mg, 0.20 mmol), 2-chlorophenylglycine (**10g**, 37.2 mg, 0.20 mmol), *N*-benzylmaleimide (**19**, 37.4 mg, 0.20 mmol) and DABCO (**21**, 22.4 mg, 0.20 mmol) in benzene (0.4 mL) were stirred at rt for 2 d (The progress of the reaction was monitored by TLC). After the reaction was completed, the volatile components were removed under reduced pressure and the residue was purified by column chromatography on silica gel (1:5 EtOAc/hexane as the eluent) to afford the cycloaddition product **20** as a racemic mixture (73.1 mg, 80% yield).

### 3. Full Results of Catalyst Screen and Reaction Condition Optimizations

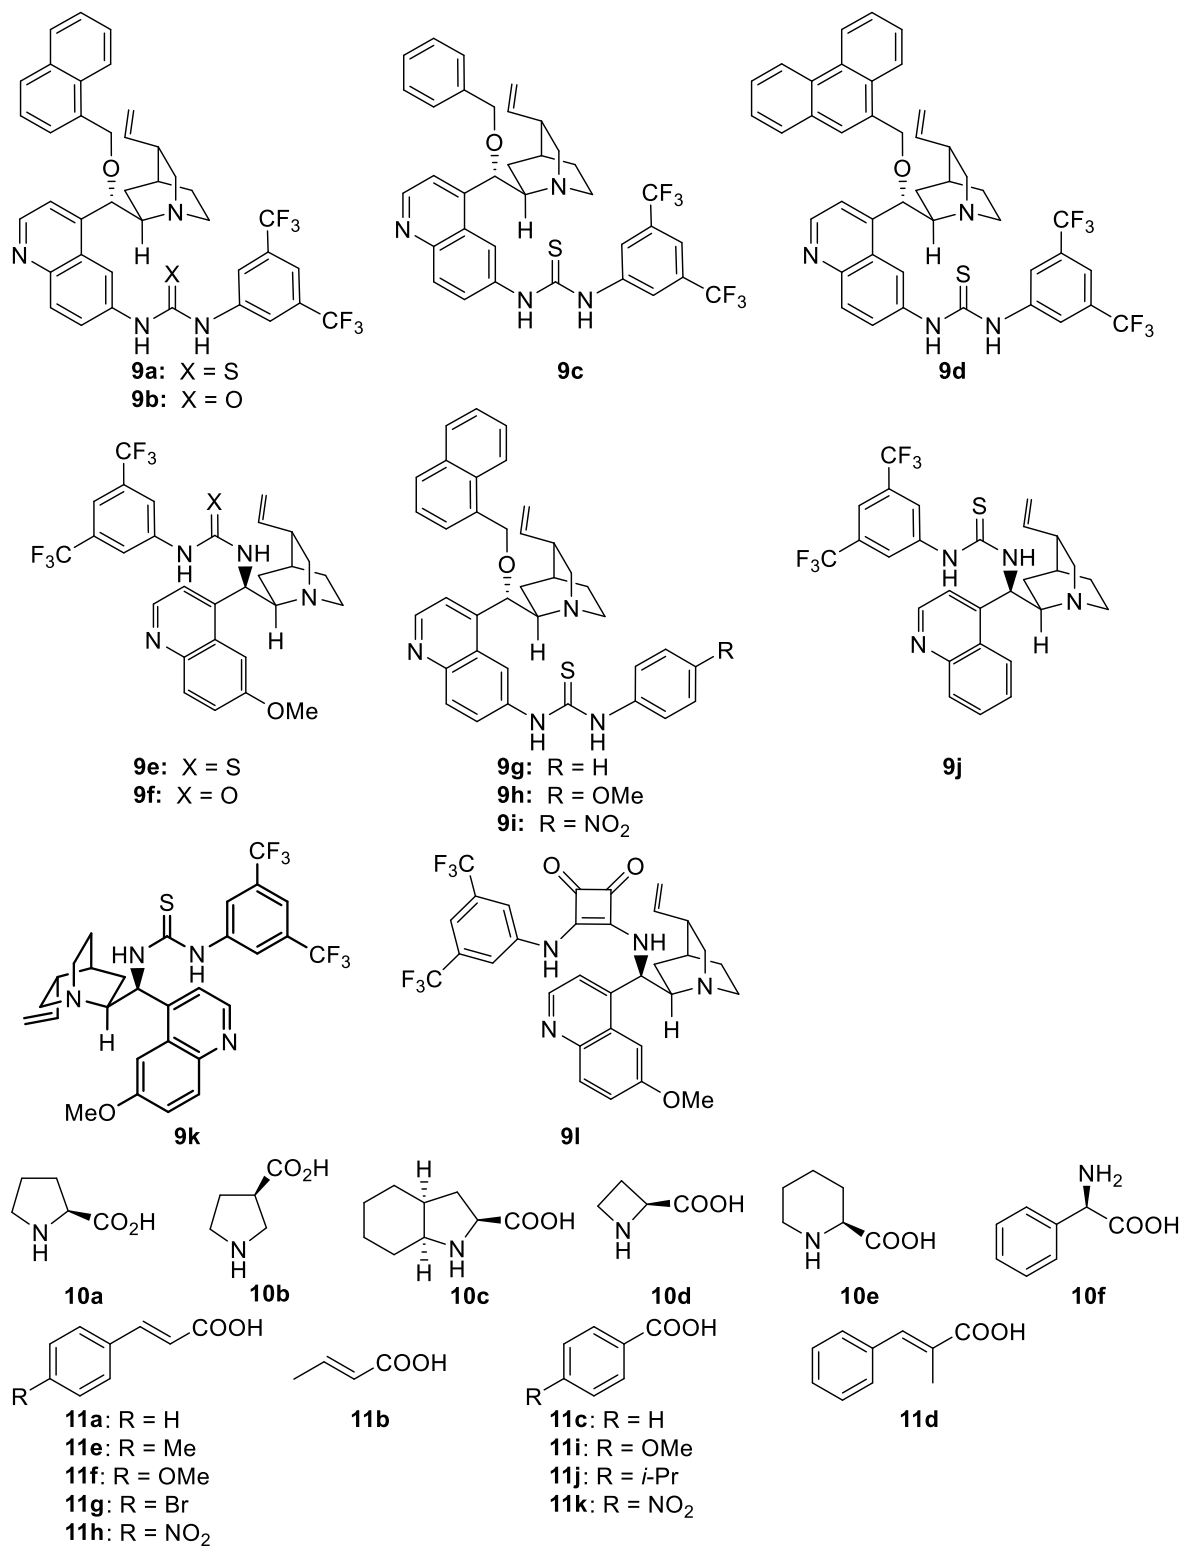

**Scheme S-1. Structure of precatalyst modules and acids used in the screening**

**Table S-1. Screening of the precatalyst modules and acids for the domino reaction<sup>a</sup>**

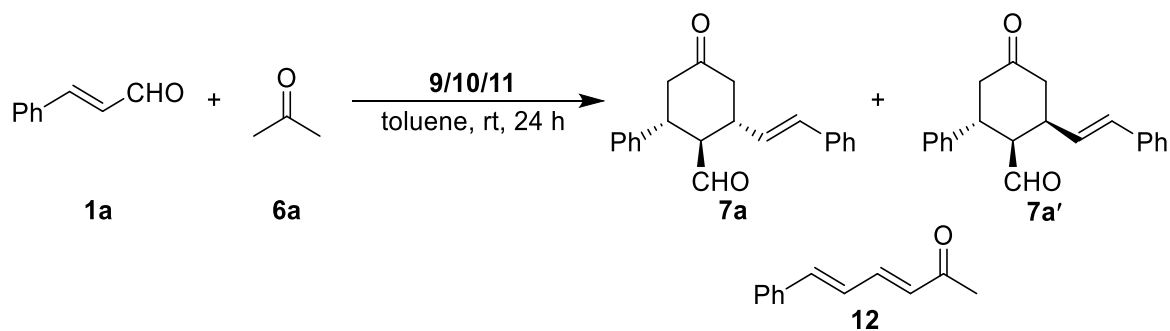

| entry          | <b>9</b>  | <b>10</b>  | <b>11</b>  | yield (%) <sup>b</sup> | dr ( <b>7a/7a'</b> ) <sup>c</sup> | ee (%) <sup>d</sup> |
|----------------|-----------|------------|------------|------------------------|-----------------------------------|---------------------|
| <b>1</b>       | <b>9a</b> | <b>10a</b> | <b>11a</b> | <b>77</b>              | <b>75:25</b>                      | <b>95</b>           |
| 2              | <b>9a</b> | -          | <b>11a</b> | -                      | -                                 | -                   |
| 3 <sup>e</sup> | -         | <b>10a</b> | <b>11a</b> | -                      | -                                 | -                   |
| 4 <sup>f</sup> | <b>9a</b> | <b>10a</b> | -          | -                      | -                                 | -                   |
| 5              | <b>9b</b> | <b>10a</b> | <b>11a</b> | 70                     | 91:29                             | 39                  |
| 6              | <b>9c</b> | <b>10a</b> | <b>11a</b> | 70                     | 71:29                             | 54                  |
| 7              | <b>9d</b> | <b>10a</b> | <b>11a</b> | 65                     | 63:37                             | 86                  |
| <b>8</b>       | <b>9e</b> | <b>10a</b> | <b>11a</b> | <b>83</b>              | <b>8:92</b>                       | <b>&gt;99</b>       |
| 9              | <b>9f</b> | <b>10a</b> | <b>11a</b> | 60                     | 32:68                             | 40                  |
| 10             | <b>9g</b> | <b>10a</b> | <b>11a</b> | 63                     | 71:29                             | 90                  |
| 11             | <b>9h</b> | <b>10a</b> | <b>11a</b> | 60                     | 73:27                             | 71                  |
| 12             | <b>9i</b> | <b>10a</b> | <b>11a</b> | 67                     | 70:30                             | 62                  |
| 13             | <b>9j</b> | <b>10a</b> | <b>11a</b> | 52                     | 57:43                             | 51                  |
| 14             | <b>9k</b> | <b>10a</b> | <b>11a</b> | 47                     | 40:60                             | 96                  |
| 15             | <b>9l</b> | <b>10a</b> | <b>11a</b> | 53                     | 40:60                             | 48                  |
| 16             | <b>9a</b> | <b>10b</b> | <b>11a</b> | 51                     | 70:30                             | 37                  |
| 17             | <b>9a</b> | <b>10c</b> | <b>11a</b> | -                      | -                                 | -                   |
| 18             | <b>9a</b> | <b>10d</b> | <b>11a</b> | -                      | -                                 | -                   |
| 19             | <b>9a</b> | <b>10e</b> | <b>11a</b> | -                      | -                                 | -                   |
| 20             | <b>9a</b> | <b>10f</b> | <b>11a</b> | -                      | -                                 | -                   |
| 21             | <b>9a</b> | <b>10a</b> | <b>11e</b> | 70                     | 71:29                             | 91                  |

To be continued

Table S-1 continued

|    |           |            |            |    |       |    |
|----|-----------|------------|------------|----|-------|----|
| 22 | <b>9a</b> | <b>10a</b> | <b>11f</b> | 42 | 61:39 | 76 |
| 23 | <b>9a</b> | <b>10a</b> | <b>11g</b> | 70 | 74:26 | 91 |
| 24 | <b>9a</b> | <b>10a</b> | <b>11h</b> | 57 | 50:50 | 84 |
| 25 | <b>9a</b> | <b>10a</b> | <b>11b</b> | 67 | 76:24 | 72 |
| 26 | <b>9a</b> | <b>10a</b> | <b>11c</b> | 42 | 70:30 | 71 |
| 27 | <b>9a</b> | <b>10a</b> | <b>11i</b> | 30 | 58:42 | 67 |
| 28 | <b>9a</b> | <b>10a</b> | <b>11j</b> | 65 | 70:30 | 86 |
| 29 | <b>9a</b> | <b>10a</b> | <b>11k</b> | 37 | 66:34 | 80 |
| 30 | <b>9a</b> | <b>10a</b> | <b>11d</b> | 50 | 70:30 | 90 |

<sup>a</sup>All reactions were carried out with **1a** (0.10 mmol), **6a** (0.10 mL), the precatalyst modules **9** and/or **10** (0.010 mmol each, 10 mol %), acid **11** (0.010 mmol) in dry toluene (1.0 mL) at room temperature for 24 h. <sup>b</sup>Yield of the isolated product after column chromatography. <sup>c</sup>Determined by <sup>1</sup>H NMR analysis of the crude product. <sup>d</sup>Determined by HPLC analysis of the major diastereomer. <sup>e</sup>The condensation product **12** was obtained in 29% yield. <sup>f</sup>The condensation product **12** was obtained in 60% yield.

Table S-2. Screening of the loading of acid **11a**<sup>a</sup>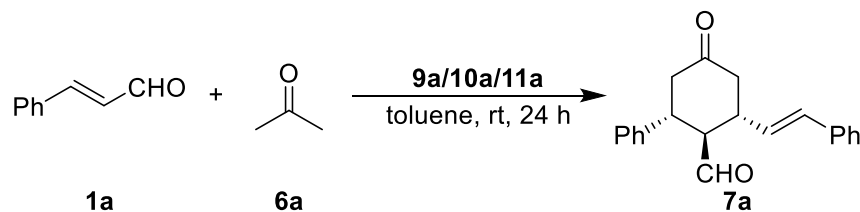

| entry    | <b>11a</b> (mol %) | yield (%) <sup>b</sup> | dr <sup>c</sup> | ee (%) <sup>d</sup> |
|----------|--------------------|------------------------|-----------------|---------------------|
| 1        | 2.5                | 40                     | 40:60           | 90                  |
| 2        | 5                  | 53                     | 46:54           | 92                  |
| <b>3</b> | <b>10</b>          | <b>77</b>              | <b>75:25</b>    | <b>95</b>           |
| 4        | 15                 | 79                     | 72:28           | 95                  |

<sup>a</sup>All reactions were carried out with **1a** (0.10 mmol), **6a** (0.10 mL), the precatalyst modules **9a** and **10a** (0.010 mmol each, 10 mol %), and **11a** in dry toluene (1.0 mL) at room temperature for 24 h. <sup>b</sup>Yield of the isolated product after column chromatography. <sup>c</sup>Determined by <sup>1</sup>H NMR analysis of the crude product. <sup>d</sup>Determined by HPLC analysis of the major diastereomer.



**Table S-3. Solvent effects on the formation of diastereomer 7a using 9a/10a/11a as the catalyst<sup>a</sup>**

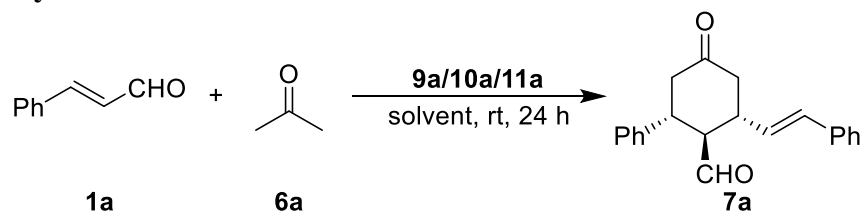

| entry    | solvent                              | yield (%) <sup>b</sup> | dr <sup>c</sup> | ee (%) <sup>d</sup> |
|----------|--------------------------------------|------------------------|-----------------|---------------------|
| 1        | toluene                              | 77                     | 75:25           | 95                  |
| 2        | benzene                              | 67                     | 67:33           | 92                  |
| 3        | CH <sub>2</sub> Cl <sub>2</sub>      | 68                     | 57:43           | 90                  |
| 4        | CHCl <sub>3</sub>                    | 60                     | 63:37           | 92                  |
| 5        | ClCH <sub>2</sub> CH <sub>2</sub> Cl | 50                     | 55:45           | 90                  |
| 6        | dioxane                              | 48                     | 58:42           | 94                  |
| 7        | H <sub>2</sub> O                     | trace                  | ---             | ---                 |
| <b>8</b> | <b>EtOH</b>                          | <b>86</b>              | <b>84:16</b>    | <b>97</b>           |
| 9        | MeOH                                 | 73                     | 79:22           | 92                  |
| 10       | <i>i</i> -PrOH                       | 72                     | 79:21           | 93                  |
| 11       | <i>t</i> -BuOH                       | 77                     | 70:30           | 97                  |

<sup>a</sup>All reactions were carried out with **1a** (0.10 mmol), **6a** (0.10 mL), the precatalyst modules **9a** and **10a** (0.010 mmol each, 10 mol%), and **11a** (0.010 mmol, 10 mol %) in the specified dry solvent (1.0 mL) at room temperature for 24 h.

<sup>b</sup>Yield of the isolated product after column chromatography. <sup>c</sup>Determined by <sup>1</sup>H NMR analysis of the crude product.

<sup>d</sup>Determined by HPLC analysis of the major diastereomer.

**Table S-4. Effects of the amount of solvent and temperature on the formation of diastereomer 7a using 9a/10a/11a as the catalyst<sup>a</sup>**

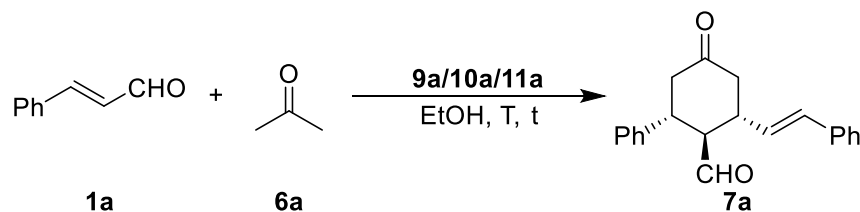

| entry    | EtOH (mL)  | temperature (°C) | time (h)  | yield (%) <sup>b</sup> | dr <sup>c</sup> | ee (%) <sup>d</sup> |
|----------|------------|------------------|-----------|------------------------|-----------------|---------------------|
| 1        | 0          | rt               | 5         | 75                     | 62:38           | 94                  |
| 2        | 0.2        | rt               | 24        | 84                     | 80:20           | 97                  |
| 3        | 0.5        | rt               | 24        | 88                     | 82:18           | 96                  |
| 4        | 1.0        | rt               | 24        | 86                     | 84:16           | 97                  |
| 5        | 1.0        | 0                | 24        | 90                     | 89:11           | 98                  |
| <b>6</b> | <b>1.0</b> | <b>-5</b>        | <b>24</b> | <b>90</b>              | <b>90:10</b>    | <b>&gt;99</b>       |

<sup>a</sup>All reactions were carried out with **1a** (0.10 mmol), **6a** (0.10 mL), the precatalyst modules **9a** and **10a** (0.010 mmol each, 10 mol%), and **11a** (0.010 mmol, 10 mol %) in dry EtOH at the specified temperature. <sup>b</sup>Yield of the isolated product after column chromatography. <sup>c</sup>Determined by <sup>1</sup>H NMR analysis of the crude product. <sup>d</sup>Determined by HPLC analysis of the major diastereomer.

**Table S-5. Solvent effects on the formation of diastereomer 7a' using 9e/10a/11a as the catalyst<sup>a</sup>**

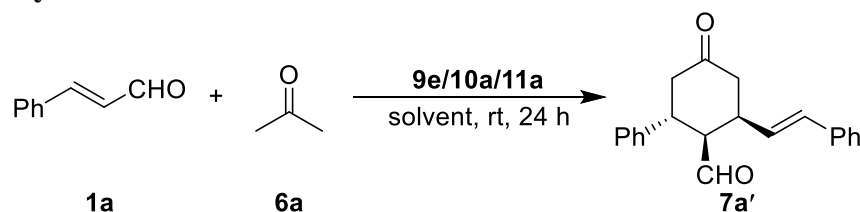

| entry    | solvent                         | yield (%) <sup>b</sup> | dr <sup>c</sup> | ee (%) <sup>d</sup> |
|----------|---------------------------------|------------------------|-----------------|---------------------|
| <b>1</b> | <b>toluene</b>                  | <b>83</b>              | <b>92:8</b>     | <b>&gt;99</b>       |
| 2        | CH <sub>2</sub> Cl <sub>2</sub> | 43                     | 81:19           | 94                  |
| 3        | CHCl <sub>3</sub>               | 47                     | 85:15           | 93                  |
| 4        | EtOH                            | 57                     | 59:41           | 92                  |
| 5        | H <sub>2</sub> O                | trace                  | ---             | ---                 |
| 6        | Et <sub>2</sub> O               | 50                     | 50:50           | 95                  |
| 7        | dioxane                         | 27                     | 65:35           | 92                  |

<sup>a</sup>All reactions were carried out with **1a** (0.10 mmol), **6a** (0.10 mL), the precatalyst modules **9e** and **10a** (0.010 mmol each, 10 mol%), and **11a** (0.010 mmol, 10 mol %) in the specified dry solvent (1.0 mL) at room temperature for 24 h. <sup>b</sup>Yield of the isolated product after column chromatography. <sup>c</sup>Determined by <sup>1</sup>H NMR analysis of the crude product. <sup>d</sup>Determined by HPLC analysis of the major diastereomer.

**Table S-6. Effects of the amount of solvent and temperature on the formation of diastereomer 7a' using 9e/10a/11a as the catalyst<sup>a</sup>**

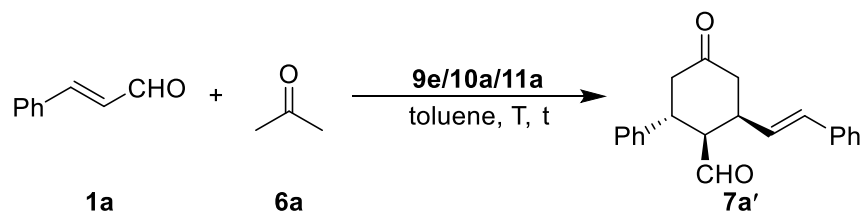

| entry    | toluene (mL) | temperature (°C) | time (h)  | yield (%) <sup>b</sup> | dr <sup>c</sup> | ee (%) <sup>d</sup> |
|----------|--------------|------------------|-----------|------------------------|-----------------|---------------------|
| 1        | 0            | rt               | 5         | 80                     | 88:12           | >99                 |
| 2        | 0.2          | rt               | 24        | 82                     | 89:11           | >99                 |
| 3        | 0.5          | rt               | 24        | 88                     | 94:6            | >99                 |
| 4        | 1.0          | rt               | 24        | 83                     | 92:8            | >99                 |
| <b>5</b> | <b>0.5</b>   | <b>0</b>         | <b>24</b> | <b>91</b>              | <b>94:6</b>     | <b>&gt;99</b>       |
| 6        | 0.5          | -5               | 24        | 91                     | 94:6            | >99                 |

<sup>a</sup>All reactions were carried out with **1a** (0.10 mmol), **6a** (0.10 mL), the precatalyst modules **9e** and **10a** (0.010 mmol each, 10 mol %), and **11a** (0.010 mmol, 10 mol %) in dry toluene. <sup>b</sup>Yield of the isolated product after column chromatography. <sup>c</sup>Determined by <sup>1</sup>H NMR analysis of the crude product. <sup>d</sup>Determined by HPLC analysis of the major diastereomer.

#### 4. ORTEP Drawing of the Reaction Products

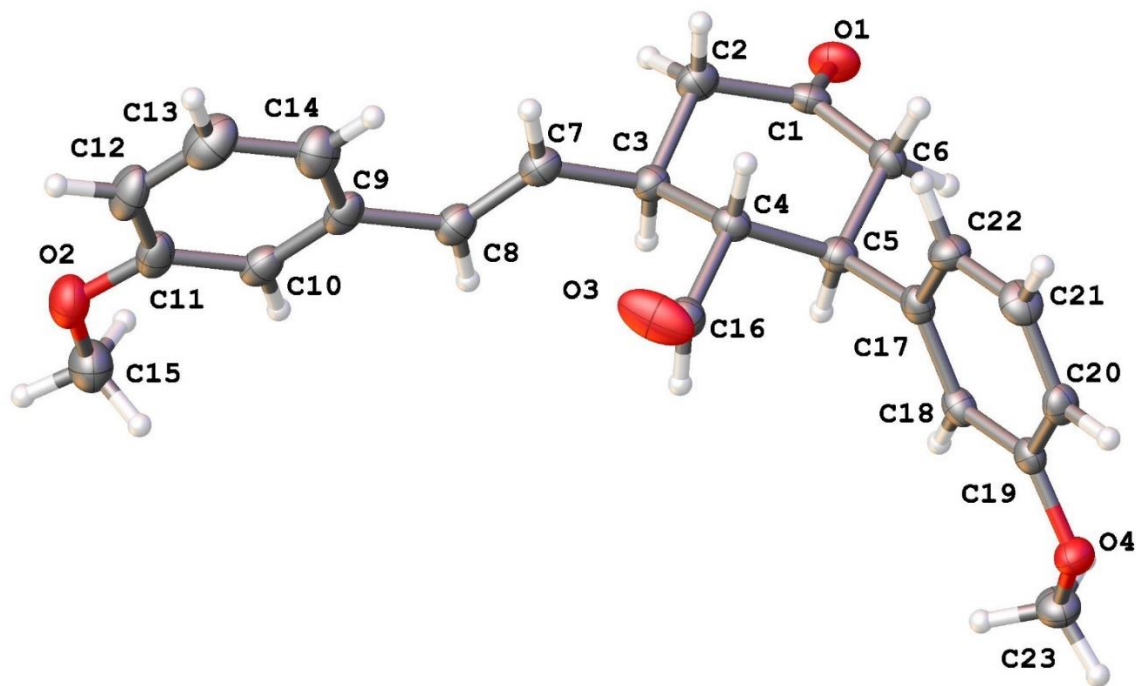

Figure S-1. ORTEP drawing of compound 7c (CCDC deposition number: 1976271).

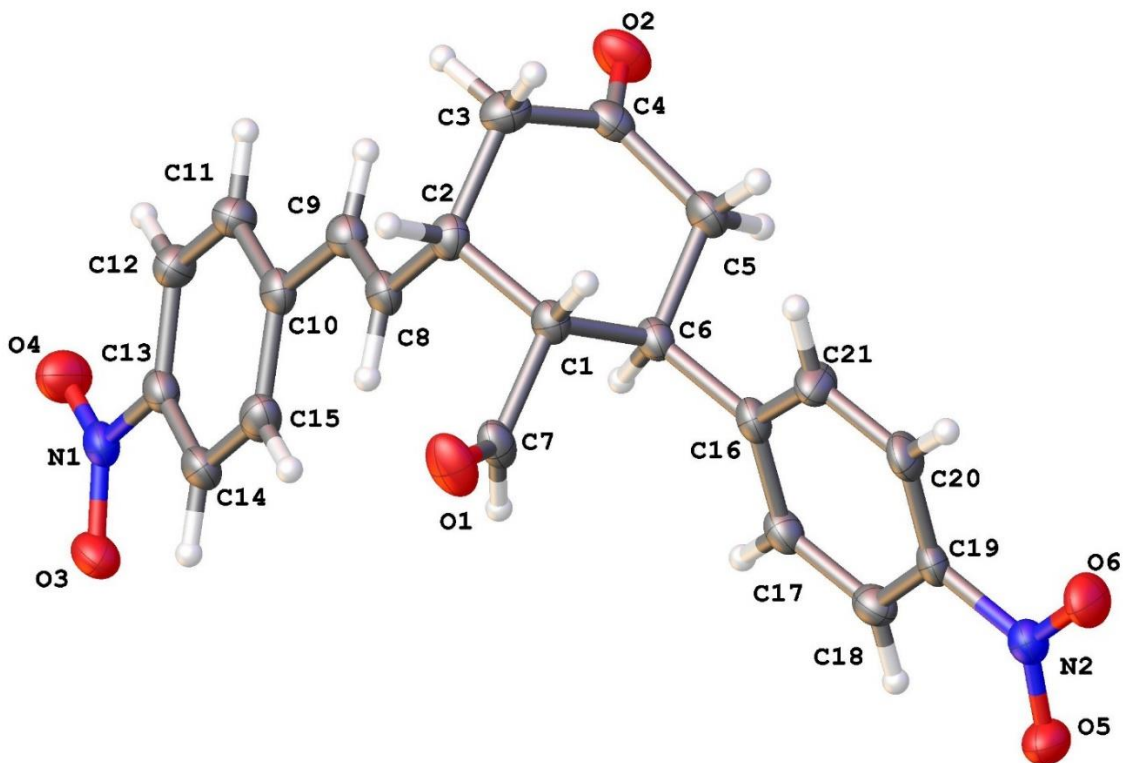

Figure S-2. ORTEP drawing of compound 7h' (CCDC deposition number: 2043408).

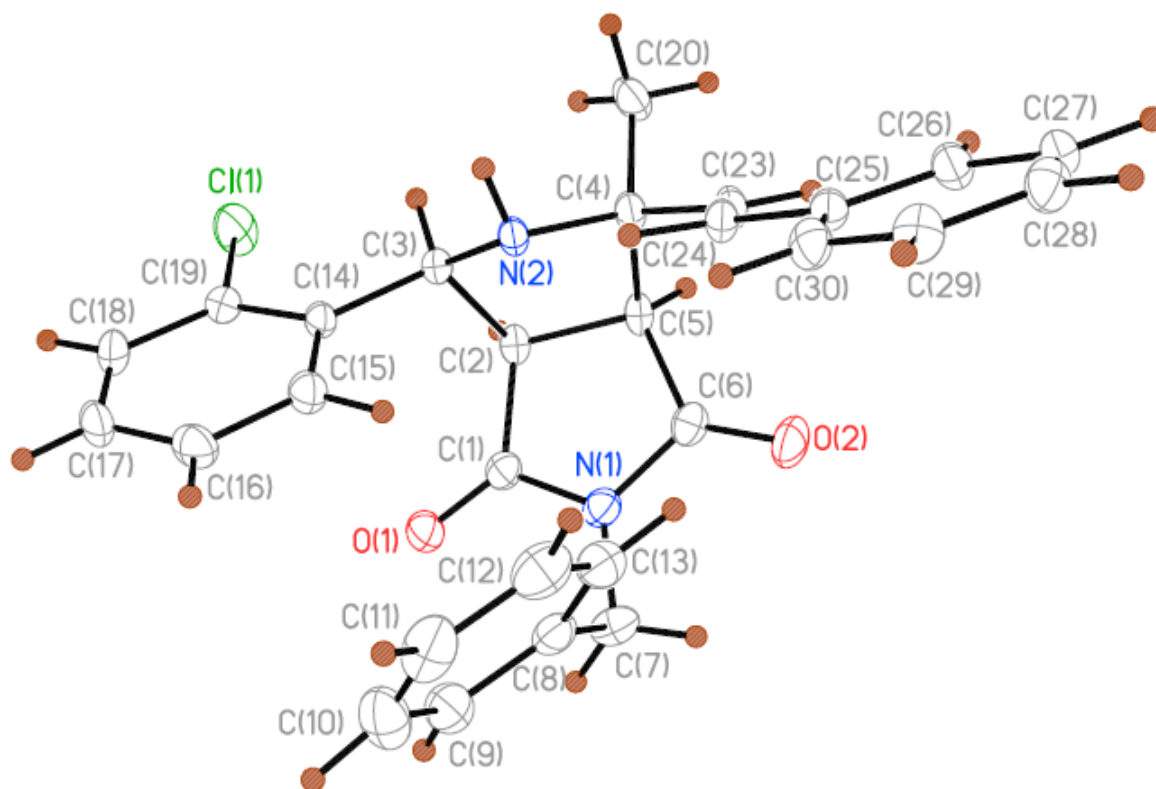

**Figure S-3. ORTEP drawing of compound 20 (CCDC deposition number: 859678).**

## 5. Mechanistic Study and Proposed Mechanisms

While we were not able to trap the decarboxylation intermediate **4** formed from *trans*-cinnamaldehyde and L-proline, we were able to trap a similar decarboxylation intermediate **22** formed from the reaction of L-2-chlorophenylglycine (**10g**) and **18** that was catalyzed by QDT (**9e**) (Scheme S-2). The trapping product **20** was fully characterized by its NMR spectra and X-ray (for details, please see the experimental part above). Similar reaction may also be conducted with DABCO as a reagent (for details, please see the experimental part above.), showing the reaction is facilitated by the base-induced deprotonation of the amino acid. These results suggest QDT can act as an inhibitor of the proline iminium catalysis via a similar decarboxylation pathway, too.

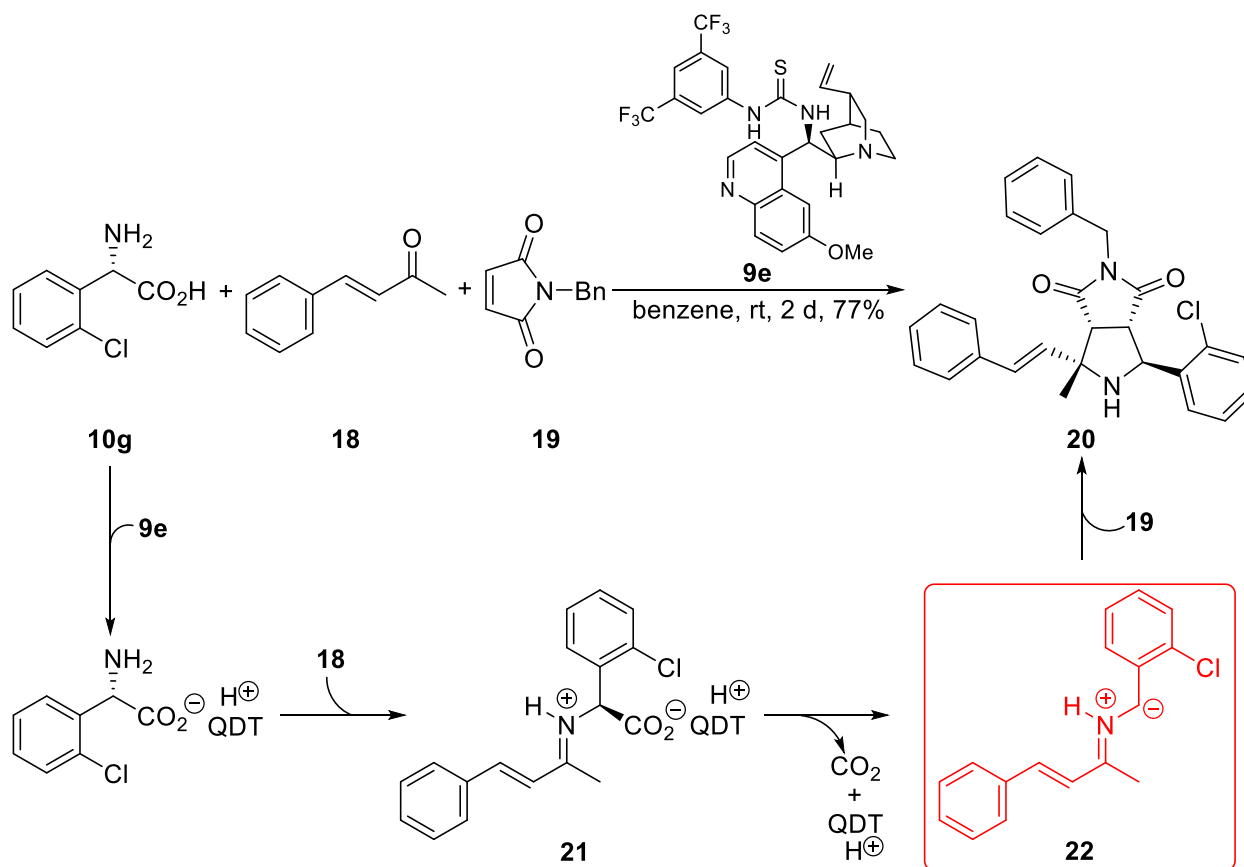

Scheme S-2. Trapping the decarboxylation intermediate **22** (QDT = **9e**).

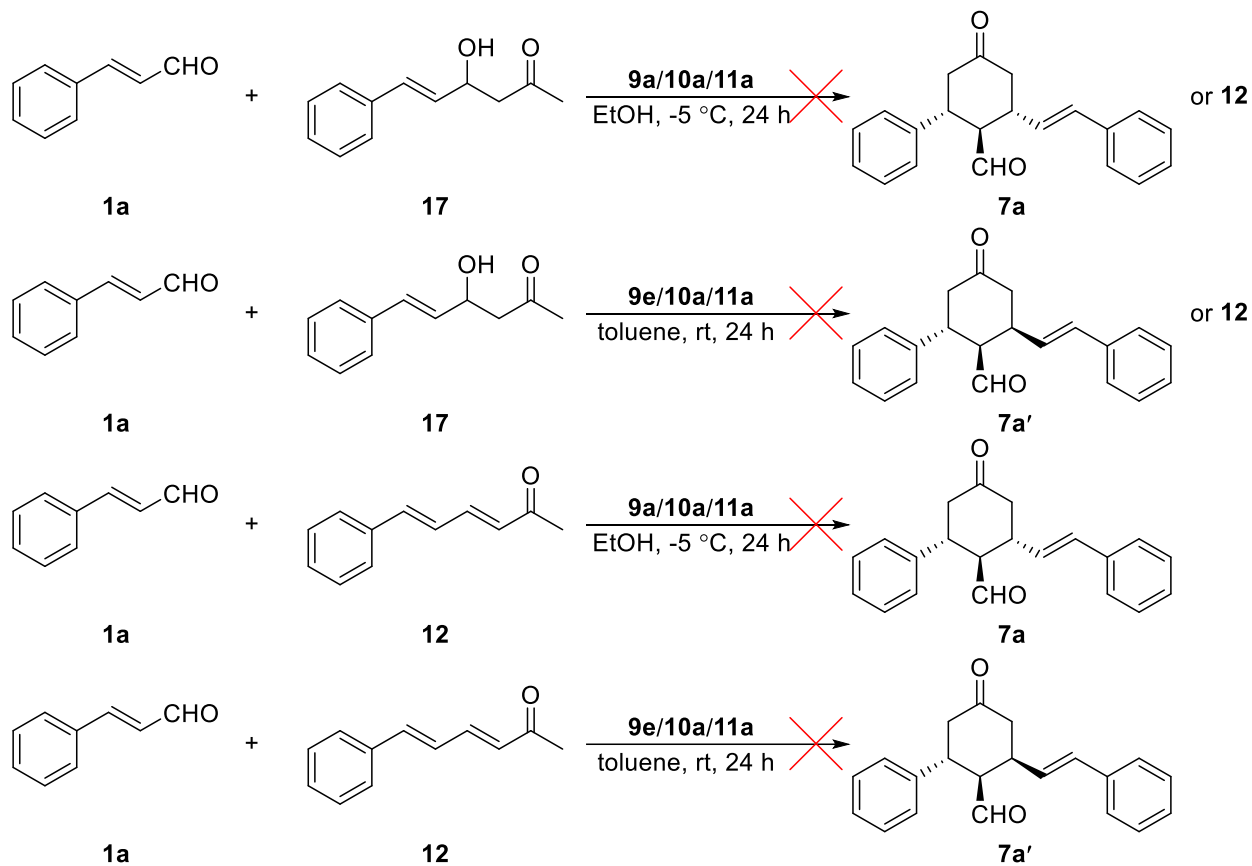

**Scheme S-3. Control reactions that eliminate the involvement of compounds **12** and **17** in the reported domino reaction.**

While Kong and coworker proposed a domino aldol condensation/Michael/Michael mechanism for this reaction,<sup>8a</sup> based on our experience, aldol condensation is unlikely to happen under our reaction conditions. In order to understand the reaction mechanism, we conducted some control experiments (Scheme S-3). We synthesized an authentic sample of the proposed aldol product of this reaction (i.e., compound **17**, for details, please see the experimental part above) and reacted this compound with **1a** under the optimized reaction conditions of both catalytic systems. As shown in Scheme S-3, we did not obtain any product from these reactions (no formation of the condensation product **12** or desired domino products **7a** or **7a'**). **These negative results exclude aldol condensation as the first step of this reaction mechanism.**

Since we obtained the mono-condensation product **12** when no acid was used in the reaction (Table 1, entry 1 of the main text), we also conducted control reactions using an authentic sample of the compound **12** (for details, please the experimental part above). As shown in Scheme S-3, the

reaction of **1a** and **12** with both catalytic systems under the optimized conditions both gave negative results. **These negative results exclude the mono-condensation product 12 as an intermediate of this reaction.**

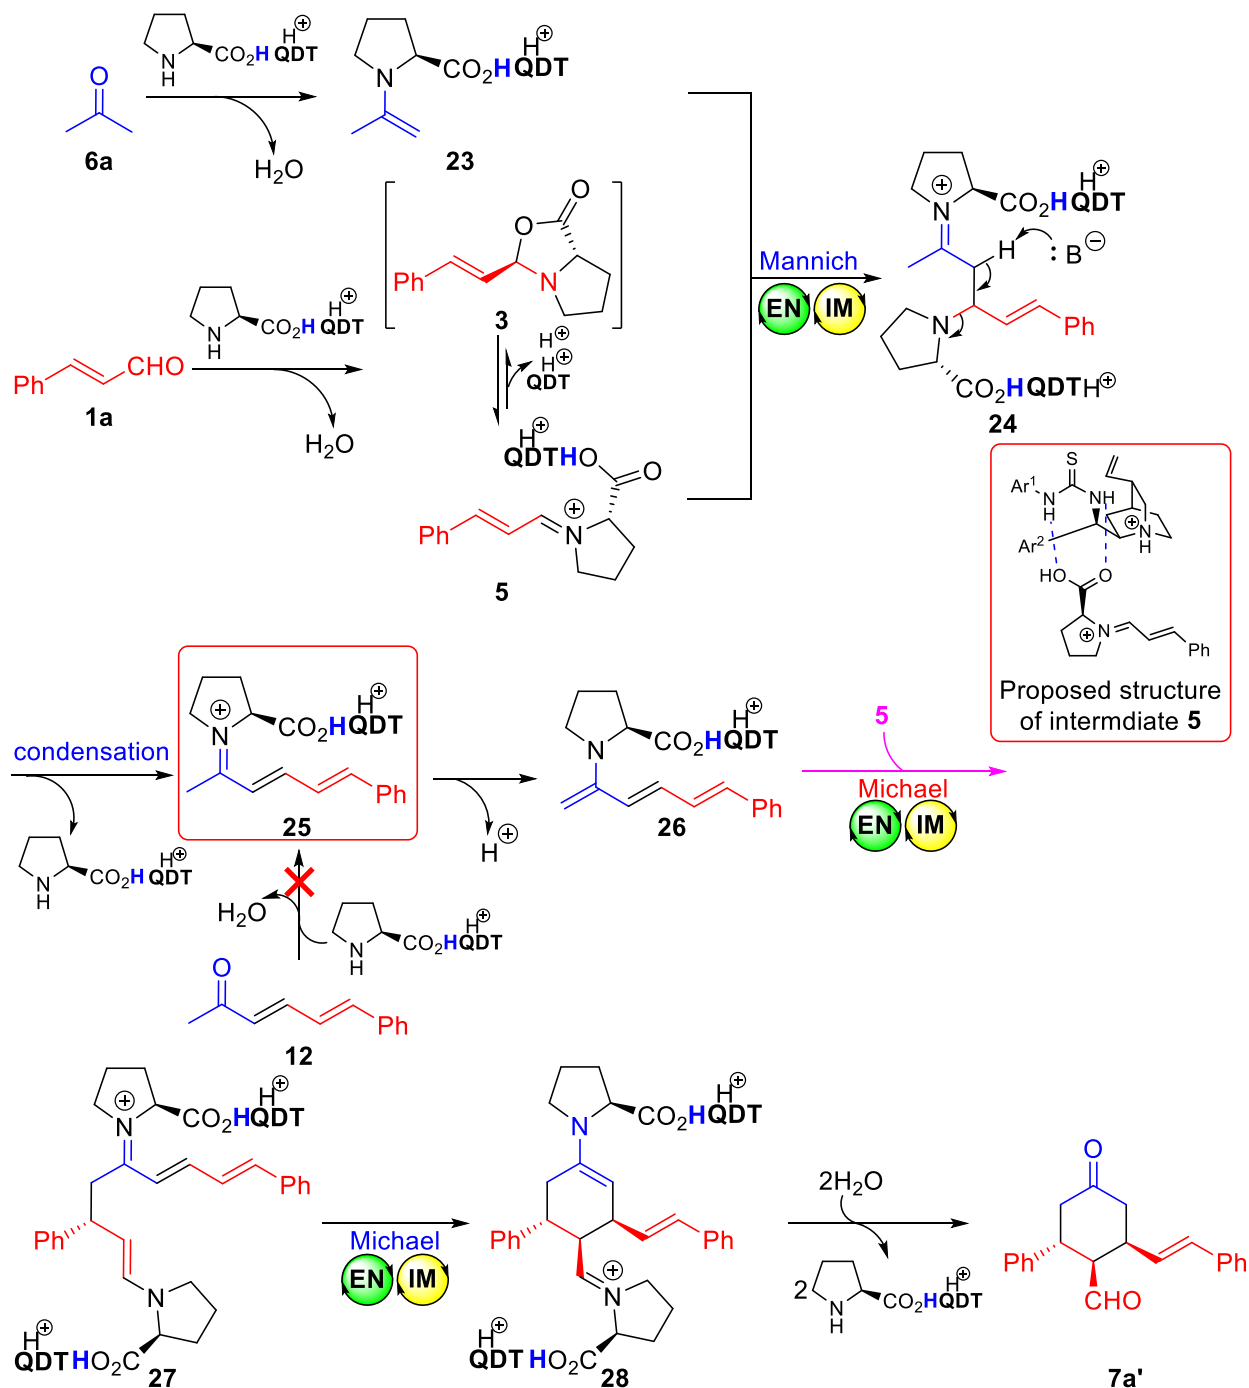

**Scheme S-4.** Proposed mechanism for the domino reaction (QDT = 9e) in the presence of an appropriate acid (represented by **H** in the proline moiety of the MDO).



Based on the above results, we propose a domino Mannich condensation/Michael/Michael reaction mechanism for our current reaction (Scheme S-4, see also Scheme 5 of the main text). It should be pointed out that proline-catalyzed condensation reactions between aldehydes is known to proceed through the Mannich mechanism instead of aldol condensation.<sup>13</sup> As shown in Scheme S-4, in the presence of a suitable acid, *trans*-cinnamaldehyde (**1a**) reacts with the protonated MDO (L-proline/QDT self-assembly) to yield the iminium intermediate **5**. While **5** is in equilibrium with the oxazolidinone intermediate **3**, we propose that the equilibrium favors **5** more than **3** in the presence of the acid. Similarly, acetone (**6a**) reacts with the MDO to yield the enamine intermediate **23**. The Mannich reaction between intermediate **23** and **5** (less likely with **3** in this case due to its low concentration and less reactivity) to yield the intermediate **24**, which undergoes an elimination reaction to give key iminium intermediate **25**. Iminium intermediate **25** then tautomerizes to become the enamine intermediate **26**, which is a **key intermediate** for this reaction. Intermediate **26** reacts with the iminium intermediate **5** again through a Michael reaction to give the enamine-iminium intermediate **27**. The later cyclizes through an intramolecular Michael reaction to give intermediate **28**, which after hydrolysis yields the desired product **7a'**. It should be pointed out that, while the Mannich condensation product **12** can be formed from intermediate **25** through hydrolysis (though this is not an important pathway in the presence of the weak acid), the reverse reaction is not possible, as our control reaction shows.

In the absence of an acid (Scheme S-5), **6a** reacts with the MDO to give the enamine intermediate **29** (which is similar to **23**, except that the proline moiety is not protonated). However, the reaction of **1a** and the MDO now mainly leads to the oxazolidinone intermediate **3** as there is no acid. The Mannich reaction between **29** and **3** leads to intermediate **30** (, which is similar to intermediate **24**). Elimination of one the proline moieties from **30** leads to the iminium intermediate **31** (, which is similar to **25**). Hydrolysis of **31** leads to the observed condensation product **12** (Table 1, entry 1 of the main text). Thus, the Mannich-condensation is still possible without any acid, because the enamine catalysis of the MDO is intact without an acid (Scheme S-5). On the other hand, the Michael reaction is not possible because there is no sufficient concentration of the iminium intermediate (an intermediate that is similar to **5**), while the oxazolidinone intermediate **3** (or cinnamaldehyde **1a**) cannot participate in the Michael reaction with the enamine intermediate **32** (Scheme S-5).

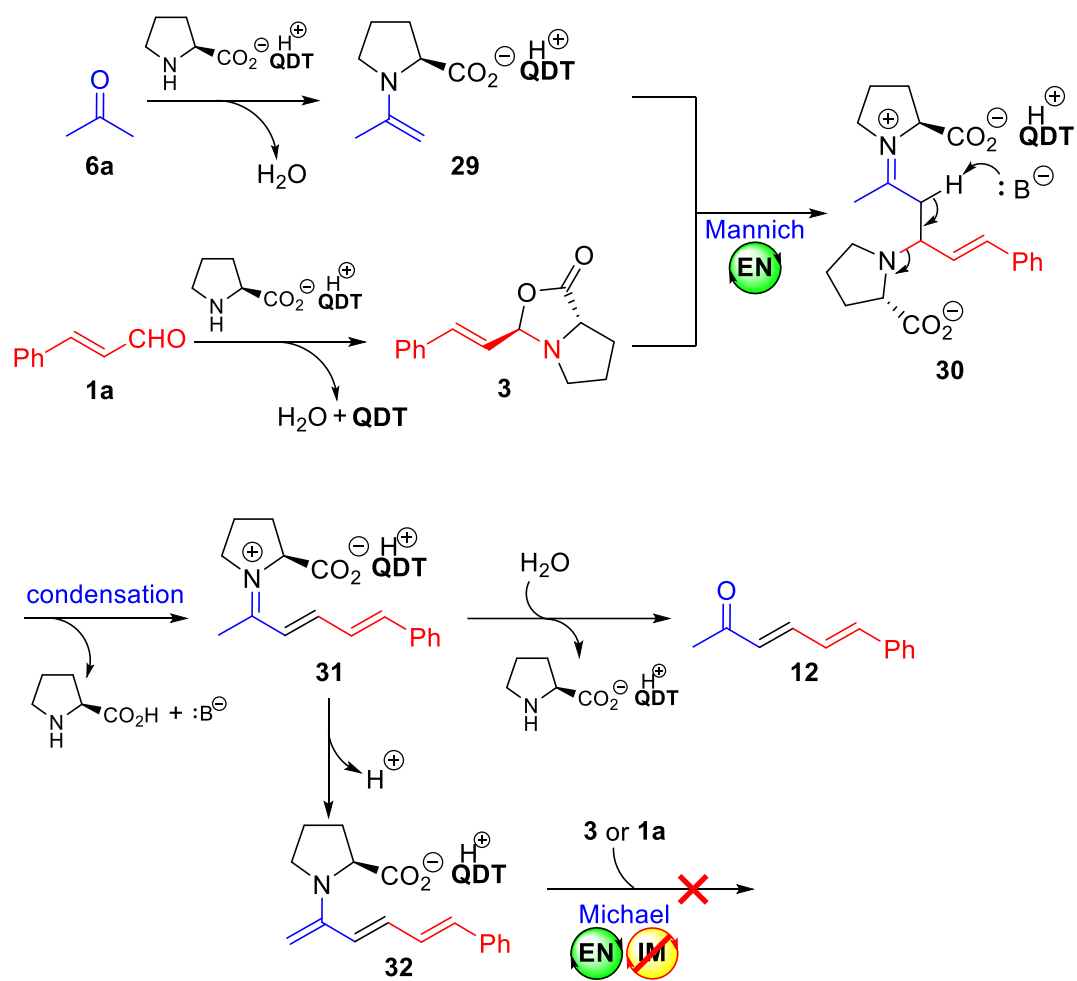

**Scheme S-5.** Proposed mechanism for the Mannich condensation reaction in the absence of an appropriate acid (QDT = 9e).

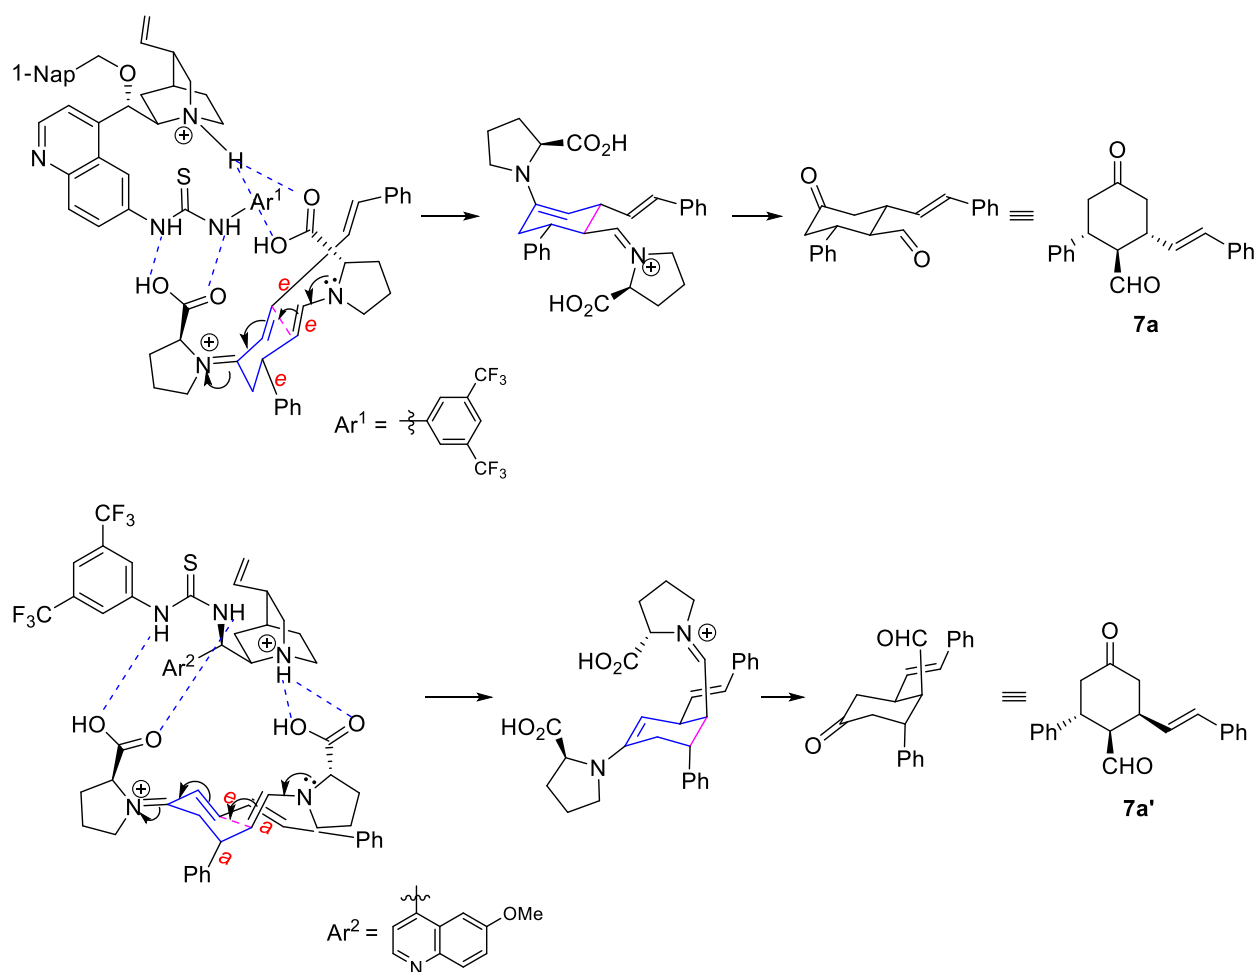

**Scheme S-6. Proposed favored transition states for the intramolecular Michael reaction that leads to diastereodivergence.**

From the absolute stereochemistry of the two diastereomeric products and the above proposed mechanism, it is evident that, for both catalytic systems, intermediates with exactly the same absolute stereochemistry (see the structure of intermediate **27** in Scheme S-4) is produced in the intermolecular Michael reaction (i.e., the first Michael reaction). The diastereodivergence is produced in the intramolecular Michael reaction (i.e., the second Michael reaction) when two different cinchona alkaloid thioureas are used (i.e., **9a** leads to **7a**, while **9e** leads to **7a'**). To explain these observations, favored transition states are proposed for both catalytic systems (Scheme S-6, see also Scheme 5 of the main text) on the basis of our previous study of the MDO enamine catalysis<sup>4d,18</sup> and a computational study of the MDO catalysis.<sup>14</sup> As shown in Scheme S-6, in both cases, the intermediate adopted a chair conformation in the favored transition states; however, to

better accommodate the hydrogen bonding between the two proline moieties of the intermediate and the cinchona alkaloid thiourea, the substrate adopted different chair conformations in these favored transition states: In the case of **9a**, the phenyl, enamine, and styryl groups are all at equatorial position. In contrast, in the case of **9e**, the phenyl, enamine, and styryl groups adopt axial, axial, and equatorial positions, respectively. Because of these differences, two product diastereomers **7a** and **7a'** are subsequently obtained (Scheme S-6). It should be pointed out that, although two proline/cinchona thioureas are required for the formation of the intermediate **27** before the final cyclization (see Scheme S-4), we believe only a **single cinchona moiety** is involved in the transition states for the formation of **7a** and **7a'** (Scheme S-6) because there is not enough space in the transition states to accommodate two such big alkaloid molecules and a single cinchona alkaloid also allows a more compact transition state to achieve the observed high stereoselectivities.

## 6. Compound Characterization Data

### (1*R*,2*R*,6*R*)-4-Oxo-2-phenyl-6-[(*E*)-styryl]cyclohexane-1-carbaldehyde (**7a**)

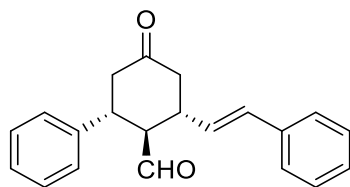

Reaction time: 24 h, white solid; 13.7 mg, 90% yield, m.p. 159-160 °C; <sup>1</sup>H NMR (500 MHz, CDCl<sub>3</sub>) δ 9.47 (d, *J* = 3.4 Hz, 1H), 7.37-7.29 (m, 5H), 7.29-7.20 (m, 5H), 6.45 (d, *J* = 15.8 Hz, 1H), 6.08 (dd, *J* = 15.8, 7.8 Hz, 1H), 3.37- 3.31 (m, 1H), 3.14-3.04 (m, 2H), 2.68-2.64 (m, 3H), 2.58-2.53 (m, 1H). <sup>13</sup>C NMR (126 MHz, CDCl<sub>3</sub>) δ 206.9, 202.4, 140.3, 136.1, 132.1, 129.2, 128.9, 128.6, 127.9, 127.7, 127.2, 126.4, 59.1, 48.2, 46.3, 44.8, 42.6.  $\nu_{\max}$  (neat, cm<sup>-1</sup>): 1068, 1109, 1240, 1289, 1334, 1417, 1452, 1491, 1706, 1721; HRMS (ESI, *m/z*) calcd for C<sub>22</sub>H<sub>21</sub>O<sub>2</sub> ([*M*+*H*]<sup>+</sup>): 305.1536; found: 305.1541. Enantiomeric excess of **7a** was determined by chiral stationary phase HPLC analysis using a ChiralPak ID column (80:20 hexanes/*i*-PrOH at 0.7 mL/min,  $\lambda$  = 254 nm); major isomer: *t*<sub>R</sub> = 18.1 min, minor isomer: *t*<sub>R</sub> = 28.3 min.

### (1*R*,2*R*,6*R*)-2-[(*E*)-4-Methylstyryl]-4-oxo-6-(*p*-tolyl)cyclohexane-1-carbaldehyde (**7b**)

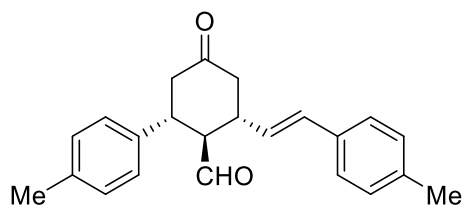

Reaction time: 48 h, white solid, 11.0 mg, 66% yield, m.p. 182-183 °C; <sup>1</sup>H NMR (500 MHz, CDCl<sub>3</sub>) δ 9.48 (d, *J* = 3.4 Hz, 1H), 7.23 (d, *J* = 8.0 Hz, 2H), 7.19 -7.09 (m, 6H), 6.42 (d, *J* = 15.8 Hz, 1H), 6.03 (dd, *J* = 15.8, 7.8 Hz, 1H), 3.39-3.24 (m, 1H), 3.16-2.95 (m, 2H), 2.69-2.62 (m, 3H), 2.55 (dd, *J* = 14.4, 12.0 Hz, 1H), 2.34 (s, 6H). <sup>13</sup>C NMR (125 MHz, CDCl<sub>3</sub>) δ 207.2, 202.6, 137.8, 137.4, 133.4, 131.9, 129.8, 129.3, 127.9, 127.0, 126.3, 59.3, 48.3, 46.4, 44.5, 42.6, 21.2, 21.0.  $\nu_{\max}$  (neat, cm<sup>-1</sup>): 1107, 1205, 1240, 1255, 1351, 1508, 1706, 1717. HRMS (ESI): *m/z* calcd for C<sub>23</sub>H<sub>25</sub>O<sub>2</sub> ([*M*+*H*]<sup>+</sup>): 333.1849; Found 333.1852. Enantiomeric excess of **7b** was determined by chiral stationary phase HPLC analysis using a ChiralPak ID column (80:20 hexanes/*i*-PrOH at 1.0 mL/min,  $\lambda$  = 254 nm), major enantiomer: *t*<sub>R</sub> = 11.5 min, minor enantiomer: *t*<sub>R</sub> = 15.2 min

**(1*R*,2*R*,6*R*)-2-(4-Methoxyphenyl)-6-[(*E*)-4-methoxystyryl]-4-oxocyclohexane-1-carbaldehyde (7c)**

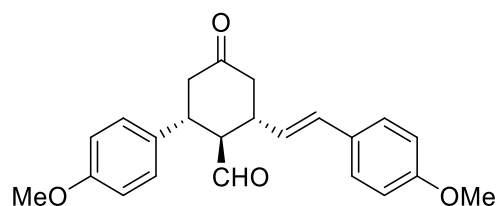

Reaction time: 32 h, white solid; 14.1 mg, 78% yield, m.p. 157-159 °C; <sup>1</sup>H NMR (500 MHz, CDCl<sub>3</sub>) δ 9.45 (d, *J* = 3.3 Hz, 1H), 7.24 (d, *J* = 8.7 Hz, 2H), 7.14 (d, *J* = 8.7 Hz, 2H), 6.86 (d, *J* = 8.7 Hz, 2H), 6.83 (d, *J* = 8.7 Hz, 2H), 6.37 (d, *J* = 15.8 Hz, 1H), 5.91 (dd, *J* = 15.8, 7.7 Hz, 1H), 3.79 (d, *J* = 7.4 Hz, 6H), 3.32-3.24 (m, 1H), 3.01 (ddd, *J* = 12.1, 7.3, 3.8 Hz, 2H), 2.68-2.58 (m, 3H), 2.54-2.46 (m, 1H). <sup>13</sup>C NMR (126 MHz, CDCl<sub>3</sub>) δ 207.2, 202.7, 159.4, 158.9, 132.4, 131.4, 128.9, 128.2, 127.6, 126.8, 114.5, 114.0, 59.5, 55.3, 55.3, 48.5, 46.4, 44.1, 42.6. *v*<sub>max</sub> (neat, cm<sup>-1</sup>): 1029, 1111, 1174, 1245, 1463, 1509, 1606, 1704, 1712; HRMS (ESI, *m/z*) calcd for C<sub>23</sub>H<sub>25</sub>O<sub>4</sub> ([*M*+*H*]<sup>+</sup>): 365.1747; found: 365.1753. Enantiomeric excess of **7c** was determined by chiral stationary phase HPLC analysis using a ChiralPak IC column (70:30 hexanes/*i*-PrOH at 1 mL/min, λ = 254 nm); major isomer: *t*<sub>R</sub> = 24.0 min, minor isomer: *t*<sub>R</sub> = 30.9 min.

**(1*R*,2*R*,6*R*)-2-(4-Fluorophenyl)-6-[(*E*)-4-fluorostyryl]-4-oxocyclohexane-1-carbaldehyde (7d)**

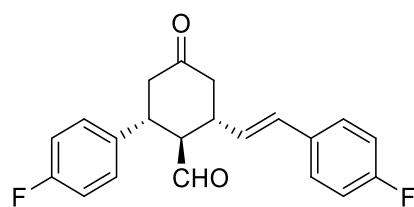

Reaction time: 40 h, white solid; 14.5 mg, 85% yield, m.p. 181-182 °C; <sup>1</sup>H NMR (500 MHz, CDCl<sub>3</sub>) δ 9.46 (d, *J* = 2.9 Hz, 1H), 7.34-7.26 (m, 2H), 7.21-7.18 (m, 2H), 7.04-6.97 (m, 4H), 6.40 (d, *J* = 15.8 Hz, 1H), 5.97 (dd, *J* = 15.8, 7.3 Hz, 1H), 3.36-3.30 (m, 1H), 3.13-2.93 (m, 2H), 2.67-2.56 (m, 3H), 2.58-2.50 (m, 1H). <sup>13</sup>C NMR (126 MHz, CDCl<sub>3</sub>) δ 206.7, 202.5, 163.1 (*J* = 63.0 Hz), 161.1 (*J* = 62.0 Hz), 135.9 (*J* = 2.5 Hz), 132.0 (*J* = 2.5 Hz), 130.9, 128.6 (*J* = 7.5 Hz), 128.2, 127.9 (*J* = 7.5 Hz), 116.1 (*J* = 21.4 Hz), 115.5 (*J* = 22.7 Hz), 59.1, 48.2, 46.2, 43.8, 42.6. *v*<sub>max</sub> (neat, cm<sup>-1</sup>): 1092, 1110, 1162, 1222, 1248, 1349, 1508, 1600, 1706, 1715; HRMS (ESI, *m/z*) calcd for C<sub>21</sub>H<sub>19</sub>F<sub>2</sub>O<sub>2</sub> ([*M*+*H*]<sup>+</sup>): 341.1348; found: 341.1352. Enantiomeric excess of **7d** was determined by chiral stationary phase HPLC analysis using a ChiralPak IC column (80:20 hexanes/*i*-PrOH at 0.7 mL/min, λ = 254 nm); minor isomer: *t*<sub>R</sub> = 19.9 min, major isomer: *t*<sub>R</sub> = 21.0 min.

**(1*R*,2*R*,6*R*)-2-(4-Chlorophenyl)-6-[(*E*)-4-chlorostyryl]-4-oxocyclohexane-1-carbaldehyde (7e)**

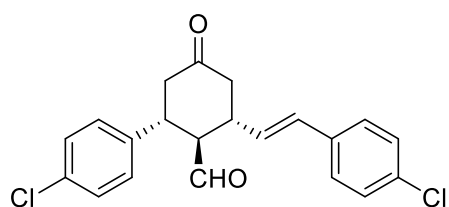

Reaction time: 32 h, white solid; 11.7 mg, 63% yield, m.p. 198-199 °C; <sup>1</sup>H NMR (500 MHz, CDCl<sub>3</sub>) δ 9.47 (s, 1H), 7.31 (d, *J* = 8.5 Hz, 2H), 7.28 -7.23 (m, 4H), 7.16 (d, *J* = 8.5 Hz, 2H), 6.39 (d, *J* = 15.8 Hz, 1H), 6.03 (dd, *J* = 15.8, 7.4 Hz, 1H), 3.36-3.30 (m, 1H), 3.08 -3.01 (m, 2H), 2.67-2.50 (m, 4H). <sup>13</sup>C NMR (126 MHz, CDCl<sub>3</sub>) δ 206.2, 202.1, 138.8, 134.5, 133.7, 133.5, 131.1, 129.4, 129.3, 128.8, 128.5, 127.6, 58.9, 48.0, 46.1, 44.0, 42.6.  $\nu_{\max}$  (neat, cm<sup>-1</sup>): 1011, 1089, 1108, 1238, 1405, 1488, 1708, 1715; HRMS (ESI, *m/z*) calcd for C<sub>21</sub>H<sub>19</sub>Cl<sub>2</sub>O<sub>2</sub> ([M+H]<sup>+</sup>): 373.0757; found: 373.0758. Enantiomeric excess of **7e** was determined by chiral stationary phase HPLC analysis using a ChiralPak ID column (80:20 hexanes/*i*-PrOH at 1.0 mL/min,  $\lambda$  = 254 nm); major isomer: *t<sub>R</sub>* = 12.1 min, minor isomer: *t<sub>R</sub>* = 14.8 min.

**(1*R*,2*R*,6*R*)-2-(4-Bromophenyl)-6-[(*E*)-4-bromostyryl]-4-oxocyclohexane-1-carbaldehyde (7f)**

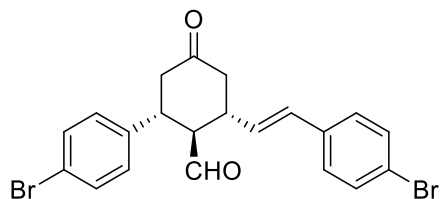

Reaction time: 45 h, white solid; 16.2 mg, 70% yield, m.p. 181-182 °C; <sup>1</sup>H NMR (500 MHz, CDCl<sub>3</sub>) δ 9.46 (d, *J* = 3.0 Hz, 1H), 7.47 (d, *J* = 8.5 Hz, 2H), 7.42 (d, *J* = 8.5 Hz, 2H), 7.17 (d, *J* = 8.5 Hz, 2H), 7.11 (d, *J* = 8.5 Hz, 2H), 6.38 (d, *J* = 15.8 Hz, 1H), 6.05 (dd, *J* = 15.8, 7.6 Hz, 1H), 3.34-3.28 (m, 1H), 3.09-3.01 (m, 2H), 2.67-2.50 (m, 4H). <sup>13</sup>C NMR (126 MHz, CDCl<sub>3</sub>) δ 206.1, 202.0, 139.3, 135.0, 132.3, 131.7, 131.2, 129.4, 128.9, 127.9, 121.8, 121.6, 58.8, 47.9, 46.1, 44.1, 42.6.  $\nu_{\max}$  (neat, cm<sup>-1</sup>): 1008, 1069, 1238, 1216, 1354, 1420, 1485, 1676, 1706, 1716; HRMS (ESI, *m/z*) calcd for C<sub>21</sub>H<sub>19</sub>Br<sub>2</sub>O<sub>2</sub> ([M+H]<sup>+</sup>): 460.9746; found: 460.9747. Enantiomeric excess of **7f** was determined by chiral stationary phase HPLC analysis using a ChiralPak ID column (80:20 hexanes/*i*-PrOH at 1.0 mL/min,  $\lambda$  = 254 nm); major isomer: *t<sub>R</sub>* = 14.6 min, minor isomer: *t<sub>R</sub>* = 13.3 min.

**(1*R*,2*R*,6*R*)-2-(4-Cyanophenyl)-6-[(*E*)-4-cyanostyryl]-4-oxocyclohexane-1-carbaldehyde (7g)**

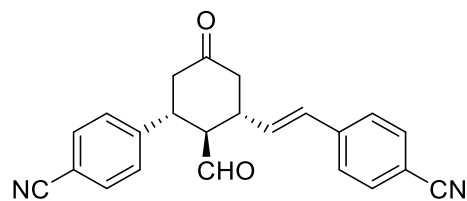

Reaction time: 48 h, white solid, 11.0 mg, 62% yield, m.p. 168-170 °C;  $^1\text{H}$  NMR (500 MHz,  $\text{CDCl}_3$ )  $\delta$  9.51 (d,  $J = 3.1$  Hz, 1H), 7.68 (d,  $J = 8.3$  Hz, 2H), 7.62 (d,  $J = 8.4$  Hz, 2H), 7.42 (d,  $J = 8.4$  Hz, 2H), 7.38 (d,  $J = 8.0$  Hz, 2H), 6.50 (d,  $J = 15.8$  Hz, 1H), 6.23 (dd,  $J = 15.9, 7.9$  Hz, 1H), 3.50 – 3.37 (m, 1H), 3.13 (ddd,  $J = 21.3, 9.4, 3.6$  Hz, 2H), 2.78-2.50 (m, 4H).  $^{13}\text{C}$  NMR (125 MHz,  $\text{CDCl}_3$ )  $\delta$  205.0, 201.3, 145.5, 140.3, 133.1, 132.5, 132.1, 131.1, 128.1, 126.9, 118.7, 118.2, 111.9, 111.5, 58.3, 47.4, 45.8, 44.4, 42.7.  $\nu_{\text{max}}$  (neat,  $\text{cm}^{-1}$ ): 1017, 1102, 1216, 1365, 1412, 1605, 1704, 1718, 2226, 2849, 2920. HRMS (ESI):  $m/z$  calcd for  $\text{C}_{23}\text{H}_{19}\text{N}_2\text{O}_2$  ( $[\text{M}+\text{H}]^+$ ): 355.1441; Found 355.1441. Enantiomeric excess of **7g** was determined by chiral stationary phase HPLC analysis using a ChiralPak ID column (70:30 hexanes/*i*-PrOH at 1.0 mL/min,  $\lambda = 254$  nm), major enantiomer:  $t_{\text{R}} = 36.8$  min, minor enantiomer:  $t_{\text{R}} = 45.4$  min

**(1R,2R,6R)-2-(4-Nitrophenyl)-6-[(E)-4-nitrostyryl]-4-oxocyclohexane-1-carbaldehyde (7h)**

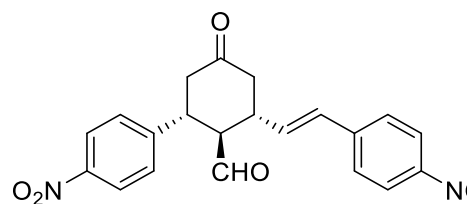

Reaction time: 48 h, yellowish solid; 15.2 mg, 77% yield; m.p. 155-156 °C;  $^1\text{H}$  NMR (500 MHz,  $\text{CDCl}_3$ )  $\delta$  9.51 (d,  $J = 3.1$  Hz, 1H), 8.22 (d,  $J = 8.6$  Hz, 2H), 8.18 (d,  $J = 8.6$  Hz, 2H), 7.46 (d,  $J = 8.5$  Hz, 2H), 7.43 (d,  $J = 8.5$  Hz, 2H), 6.55 (d,  $J = 15.8$  Hz, 1H), 6.27 (dd,  $J = 15.8, 8.2$  Hz, 1H), 3.54-3.48 (m, 1H), 3.22-3.10 (m, 2H), 2.72-2.58 (m, 4H).  $^{13}\text{C}$  NMR (126 MHz,  $\text{CDCl}_3$ )  $\delta$  204.7, 201.2, 147.4, 142.1, 132.9, 130.8, 128.2, 127.0, 124.5, 124.1, 58.3, 47.4, 45.8, 44.2, 42.8.  $\nu_{\text{max}}$  (neat,  $\text{cm}^{-1}$ ): 1057, 1107, 1241, 1298, 1342, 1517, 1593, 1705, 1718; HRMS (ESI,  $m/z$ ) calcd for  $\text{C}_{21}\text{H}_{19}\text{N}_2\text{O}_6$  ( $[\text{M}+\text{H}]^+$ ): 395.1238; found: 395.1246. Enantiomeric excess of **7h** was determined by chiral stationary phase HPLC analysis using a ChiralPak ID column (70:30 hexanes/*i*-PrOH at 1.0 mL/min,  $\lambda = 254$  nm); major isomer:  $t_{\text{R}} = 58.6$  min, minor isomer:  $t_{\text{R}} = 78.0$  min.

**(1R,2R,6R)-2-(2-Methoxyphenyl)-6-[(E)-2-methoxystyryl]-4-oxocyclohexane-1-carbaldehyde (7i)**



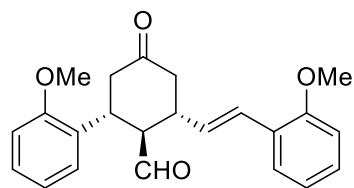

Reaction time: 32 h, white solid; 14.1 mg, 78% yield, m.p. 154-156 °C;  $^1\text{H}$  NMR (500 MHz,  $\text{CDCl}_3$ )  $\delta$  9.43 (d,  $J = 4.0$  Hz, 1H), 7.35 (dd,  $J = 7.6, 1.7$  Hz, 1H), 7.24-7.18 (m, 3H), 6.95-6.83 (m, 4H), 6.77 (d,  $J = 15.8$  Hz, 1H), 6.08 (dd,  $J = 15.8, 7.8$  Hz, 1H), 3.84 (s, 3H), 3.83 (s, 3H), 3.76-3.72 (m, 1H), 3.14-3.07 (m, 2H), 2.81-2.72 (m, 1H), 2.63-2.53 (m, 3H).  $^{13}\text{C}$  NMR (126 MHz,  $\text{CDCl}_3$ )  $\delta$  208.0, 202.5, 156.7, 156.6, 129.8, 128.9, 128.6, 128.3, 128.0, 126.8, 126.6, 125.3, 121.1, 120.6, 111.0, 110.9, 58.4, 55.5, 55.3, 46.4, 45.9, 42.7, 38.4.  $\nu_{\text{max}}$  (neat,  $\text{cm}^{-1}$ ): 1025, 1049, 1106, 1241, 1360, 1437, 1463, 1492, 1599, 1711; HRMS (ESI,  $m/z$ ) calcd for  $\text{C}_{23}\text{H}_{25}\text{O}_4$  ( $[\text{M}+\text{H}]^+$ ): 365.1747; found: 365.1749. Enantiomeric excess of **7i** was determined by chiral stationary phase HPLC analysis using a ChiralPak IC column (85:15 hexanes/*i*-PrOH at 0.7 mL/min,  $\lambda = 220$  nm); major isomer:  $t_{\text{R}} = 40.8$  min, minor isomer:  $t_{\text{R}} = 44.2$  min.

**(1R,2R,6R)-2-(3-Methoxyphenyl)-6-[(E)-3-methoxystyryl]-4-oxocyclohexane-1-carbaldehyde (7j)**

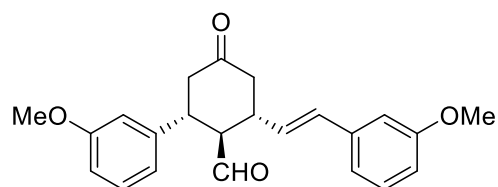

Reaction time: 32 h, white solid; 14.9 mg, 83% yield, m.p. 161-162 °C;  $^1\text{H}$  NMR (500 MHz,  $\text{CDCl}_3$ )  $\delta$  9.48 (d,  $J = 3.5$  Hz, 1H), 7.27-7.25 (m, 1H), 7.24-7.20 (m, 1H), 6.92-6.90 (m, 1H), 6.85-6.77 (m, 4H), 6.76-6.75 (m, 1H), 6.41 (d,  $J = 15.5$  Hz, 1H), 6.06 (dd,  $J = 15.5, 8.0$  Hz, 1H), 3.81 (s, 3H), 3.81 (s, 3H), 3.33-3.27 (m, 1H), 3.12-3.02 (m, 2H), 2.66-2.63 (m, 3H), 2.56-2.51 (m, 1H).  $^{13}\text{C}$  NMR (126 MHz,  $\text{CDCl}_3$ )  $\delta$  206.9, 202.4, 160.1, 159.8, 141.9, 137.6, 132.0, 130.2, 129.6, 129.2, 119.3, 119.0, 113.6, 113.3, 112.5, 111.7, 58.9, 55.2, 55.2, 48.1, 46.2, 44.9, 42.5.  $\nu_{\text{max}}$  (neat,  $\text{cm}^{-1}$ ): 1033, 1080, 1185, 1244, 1262, 1292, 1427, 1450, 1488, 1567, 1704, 1720; HRMS (ESI,  $m/z$ ) calcd for  $\text{C}_{23}\text{H}_{25}\text{O}_4$  ( $[\text{M}+\text{H}]^+$ ): 365.1747; found: 366.1337. Enantiomeric excess of **7j** was determined by chiral stationary phase HPLC analysis using a ChiralPak IB column (90:10 hexanes/*i*-PrOH at 1 mL/min,  $\lambda = 220$  nm); major isomer:  $t_{\text{R}} = 66.0$  min, minor isomer:  $t_{\text{R}} = 82.5$  min.

**(1R,2R,6R)-2-(4-Acetoxy-3-methoxyphenyl)-6-[(E)-4-acetoxy-3-methoxystyryl]-4-oxocyclohexane-1-carbaldehyde (7k)**

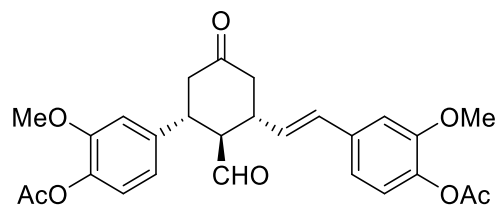

Reaction time: 48 h, white solid; 17.0 mg, 71% yield, m.p. 180-182 °C;  $^1\text{H NMR}$  (500 MHz,  $\text{CDCl}_3$ )  $\delta$  9.50 (d,  $J = 3.4$  Hz, 1H), 7.00 (d,  $J = 8.2$  Hz, 1H), 6.97 (d,  $J = 8.2$  Hz, 1H), 6.93-6.88 (m, 2H), 6.83 (dd,  $J = 8.2, 2.0$  Hz, 1H), 6.79 (d,  $J = 2.0$  Hz, 1H), 6.41 (d,  $J = 15.7$  Hz, 1H), 6.02 (dd,  $J = 15.7, 8.1$  Hz, 1H), 3.84 (d,  $J = 5.5$  Hz, 6H), 3.33 (ddd,  $J = 12.7, 11.1, 4.9$  Hz, 1H), 3.18-2.96 (m, 2H), 2.70-2.47 (m, 4H), 2.30 (d,  $J = 1.9$  Hz, 6H).  $^{13}\text{C NMR}$  (126 MHz,  $\text{CDCl}_3$ )  $\delta$  206.5, 202.3, 169.0, 168.9, 151.4, 151.1, 139.5, 139.1, 139.0, 135.2, 131.6, 129.1, 123.4, 122.9, 119.0, 111.5, 110.1, 58.8, 55.9, 55.9, 48.2, 46.1, 44.6, 42.5, 20.6.  $\nu_{\text{max}}$  (neat,  $\text{cm}^{-1}$ ): 1031, 1121, 1155, 1197, 1268, 1368, 1418, 1464, 1508, 1602, 1703, 1713, 1759; HRMS (ESI,  $m/z$ ) calcd for  $\text{C}_{27}\text{H}_{29}\text{O}_8$  ( $[\text{M}+\text{H}]^+$ ): 481.1857; found: 481.1856. Enantiomeric excess of **7k** was determined by chiral stationary phase HPLC analysis using a ChiralPak IB column (60:40 hexanes/*i*-PrOH at 1 mL/min,  $\lambda = 254$  nm); minor isomer:  $t_{\text{R}} = 34.5$  min, major isomer:  $t_{\text{R}} = 37.8$  min.

**(1R,2R,6R)-2-(Naphthalen-1-yl)-6-[(E)-2-(naphthalen-1-yl)vinyl]-4-oxocyclohexane-1-carbaldehyde (7l)**

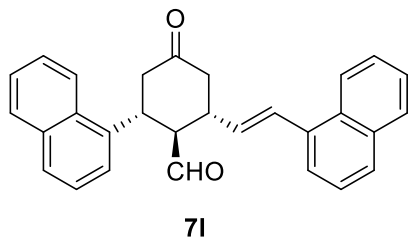

Reaction time: 48 h, white solid; 16.0 mg, 79% yield, m.p. 185-186 °C;  $^1\text{H NMR}$  (500 MHz,  $\text{CDCl}_3$ )  $\delta$  9.54 (d,  $J = 3.7$  Hz, 1H), 8.10 (d,  $J = 8.5$  Hz, 1H), 7.91 – 7.82 (m, 2H), 7.78 (d,  $J = 8.2$  Hz, 2H), 7.61 – 7.40 (m, 8H), 7.23 (d,  $J = 15.5$  Hz, 1H), 6.15 (dd,  $J = 15.5, 8.2$  Hz, 1H), 4.32 (t,  $J = 11.2$  Hz, 1H), 3.54 – 3.26 (m, 2H), 2.90 – 2.64 (m, 4H).  $^{13}\text{C NMR}$  (125 MHz,  $\text{CDCl}_3$ ) 206.9, 202.0, 134.1, 133.5, 132.4, 131.0, 130.7, 129.7, 129.2, 128.5, 128.3, 128.1, 126.7, 126.2, 126.0, 125.8, 125.5, 124.1, 123.6, 122.1, 58.7, 46.5, 43.1, 29.7.  $\nu_{\text{max}}$  (neat,  $\text{cm}^{-1}$ ): 964, 1014, 1052, 1237, 1395, 1508, 1591, 1703. HRMS (ESI,  $m/z$ ) calcd for  $\text{C}_{29}\text{H}_{25}\text{O}_2$  ( $[\text{M}+\text{H}]^+$ ): 405.1849; found: 405.1848. Enantiomeric excess of **7l** was determined by chiral stationary phase HPLC analysis using a ChiralPak IC column (80:20 hexanes/*i*-PrOH at 1.0 mL/min,  $\lambda = 220$  nm); minor isomer:  $t_{\text{R}} = 36.3$  min, major isomer:  $t_{\text{R}} = 27.0$  min.

**(1R,2R,6R)-4-Oxo-2-(thiophen-2-yl)-6-[(E)-2-(thiophen-2-yl)vinyl]cyclohexane-1-carbaldehyde (7m)**

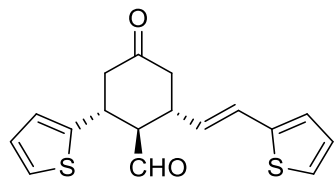

Reaction time: 72 h, white solid, 7.9 mg, 50% yield, m.p. 161-163 °C;  $^1\text{H}$  NMR (500 MHz,  $\text{CDCl}_3$ )  $\delta$  9.61 (d,  $J = 3.2$  Hz, 1H), 7.35-7.06 (m, 3H), 7.00-6.80 (m, 3H), 6.58 (d,  $J = 15.6$  Hz, 1H), 5.90 (dd,  $J = 15.6, 8.2$  Hz, 1H), 3.71 (ddd,  $J = 12.9, 10.9, 4.4$  Hz, 1H), 3.17-2.88 (m, 2H), 2.85-2.37 (m, 4H).  $^{13}\text{C}$  NMR (125 MHz,  $\text{CDCl}_3$ )  $\delta$  205.9, 202.1, 144.1, 141.0, 128.0, 127.4, 127.1, 126.2, 125.5, 124.8, 124.6, 124.5, 60.0, 49.1, 46.1, 42.4, 39.7.  $\nu_{\text{max}}$  (neat,  $\text{cm}^{-1}$ ): 1010, 1216, 1227, 1365, 1389, 1719, 1735, 2918. HRMS (ESI):  $m/z$  calcd for  $\text{C}_{17}\text{H}_{17}\text{O}_2\text{S}_2$  ( $[\text{M}+\text{H}]^+$ ): 317.0664; Found 317.0667. Enantiomeric excess of **7m** was determined by chiral stationary phase HPLC analysis using a ChiralPak ID column (80:20 hexanes/*i*-PrOH at 1.0 mL/min,  $\lambda = 254$  nm), major enantiomer:  $t_{\text{R}} = 18.5$  min, minor enantiomer:  $t_{\text{R}} = 31.4$  min

**(1R,2S,3R,6R)-3-Methyl-4-oxo-2-phenyl-6-[(E)-styryl]cyclohexane-1-carbaldehyde (7n)**

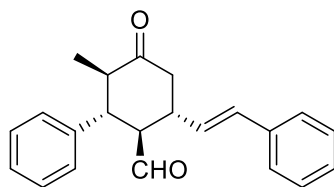

Reaction time: 168 h, white solid; 6.0 mg, 38% yield, m.p. 147-148 °C;  $^1\text{H}$  NMR (500 MHz,  $\text{CDCl}_3$ )  $\delta$  9.37 (d,  $J = 3.7$  Hz, 1H), 7.35-7.29 (m, 5H), 7.27-7.19 (m, 5H), 6.43 (d,  $J = 15.8$  Hz, 1H), 6.07 (dd,  $J = 15.8, 8.1$  Hz, 1H), 3.17 (td,  $J = 11.2, 3.7$  Hz, 1H), 3.04 (tdd,  $J = 12.2, 8.0, 4.6$  Hz, 1H), 3.07-3.00 (m, 1H), 2.78-2.60 (m, 3H), 0.84 (d,  $J = 6.4$  Hz, 3H).  $^{13}\text{C}$  NMR (126 MHz,  $\text{CDCl}_3$ )  $\delta$  208.6, 202.3, 139.5, 136.2, 131.9, 129.1, 129.0, 128.6, 127.9, 127.7, 127.6, 126.4, 60.3, 52.2, 49.4, 46.6, 42.9, 11.7.  $\nu_{\text{max}}$  (neat,  $\text{cm}^{-1}$ ): 1001, 1071, 1134, 1224, 1282, 1343, 1448, 1490, 1708, 1716; HRMS (ESI,  $m/z$ ) calcd for  $\text{C}_{22}\text{H}_{23}\text{O}_2$  ( $[\text{M}+\text{H}]^+$ ): 319.1693; found: 319.1697. Enantiomeric excess of **7n** was determined by chiral stationary phase HPLC analysis using a ChiralPak ID column (85:15 hexanes/*i*-PrOH at 1.0 mL/min,  $\lambda = 254$  nm); major isomer:  $t_{\text{R}} = 23.3$  min, minor isomer:  $t_{\text{R}} = 28.5$  min.

**(1R,2R,6S)-4-Oxo-2-phenyl-6-[(E)-styryl]cyclohexane-1-carbaldehyde (7a')**

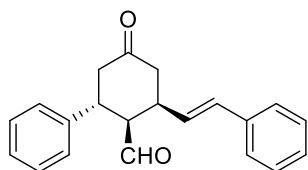

Reaction time: 24 h, white solid; 13.8 mg, 91% yield, m.p. 154-155 °C;  $^1\text{H}$  NMR (500 MHz,  $\text{CDCl}_3$ )  $\delta$  9.66 (d,  $J = 2.0$  Hz, 1H), 7.36-7.28 (m, 5H), 7.27-7.23 (m, 5H), 6.45 (dd,  $J = 16.0, 1.3$  Hz, 1H), 6.23 (dd,  $J = 16.0, 7.5$  Hz, 1H), 3.76-3.71 (m, 1H), 3.43-3.40 (m, 1H), 3.20-3.17 (m, 1H), 2.81-2.62 (m, 4H).

$^{13}\text{C}$  NMR (126 MHz,  $\text{CDCl}_3$ )  $\delta$  208.3, 203.1, 141.4, 136.2, 133.4, 129.1, 128.6, 128.0, 127.4, 127.3, 126.5, 126.4, 57.0, 47.0, 45.1, 39.8, 39.4.  $\nu_{\text{max}}$  (neat,  $\text{cm}^{-1}$ ): 1072, 1110, 1239, 1398, 1454, 1492, 1606, 1708, 1720; HRMS (ESI,  $m/z$ ) calcd for  $\text{C}_{21}\text{H}_{21}\text{O}_2$  ( $[\text{M}+\text{H}]^+$ ): 305.1536; found: 305.1535. Enantiomeric excess of **7a'** was determined by chiral stationary phase HPLC analysis using a ChiralPak IC column (80:20 hexanes/*i*-PrOH at 0.7 mL/min,  $\lambda = 254$  nm); major isomer:  $t_{\text{R}} = 13.4$  min, minor isomer:  $t_{\text{R}} = 18.1$  min.

**(1*R*,2*R*,6*S*)-2-[(*E*)-4-Methylstyryl]-4-oxo-6-(*p*-tolyl)cyclohexane-1-carbaldehyde (7b')**

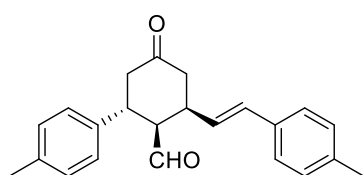

Reaction time: 48 h, white solid, 12.1 mg, 73% yield, m.p. 178-179 °C;  $^1\text{H}$  NMR (500 MHz,  $\text{CDCl}_3$ )  $\delta$  9.66 (d,  $J = 2.0$  Hz, 1H), 7.33-7.04 (m, 8H), 6.43 (d,  $J = 15.9$  Hz, 1H), 6.19 (dd,  $J = 15.9, 7.5$  Hz, 1H), 3.71 (q,  $J = 4.4$  Hz, 1H), 3.42 (dd,  $J = 7.7, 4.7$  Hz, 1H), 3.21 - 3.04 (m, 1H), 2.85-2.57 (m, 4H), 2.35 (s, 6H).  $^{13}\text{C}$  NMR (125 MHz,  $\text{CDCl}_3$ )  $\delta$  208.5, 203.5, 138.4, 137.9, 137.1, 133.5, 133.2, 129.8, 129.3, 127.2, 126.3, 125.4, 57.1, 47.2, 45.2, 39.5, 39.5, 21.2, 21.0.  $\nu_{\text{max}}$  (neat,  $\text{cm}^{-1}$ ): 1017, 1107, 1240, 1255, 1356, 1412, 1514, 1708, 1717. HRMS (ESI):  $m/z$  calcd for  $\text{C}_{23}\text{H}_{25}\text{O}_2$  ( $[\text{M}+\text{H}]^+$ ): 333.1849; Found 333.1844. Enantiomeric excess of **7b'** was determined by chiral stationary phase HPLC analysis using a ChiralPak ID column (80:20 hexanes/*i*-PrOH at 1.0 mL/min,  $\lambda = 254$  nm), major enantiomer:  $t_{\text{R}} = 8.7$  min, minor enantiomer:  $t_{\text{R}} = 10.1$  min.

**(1*R*,2*R*,6*S*)-2-(4-Methoxyphenyl)-6-[(*E*)-4-methoxystyryl]-4-oxocyclohexane-1-carbaldehyde (7c')**

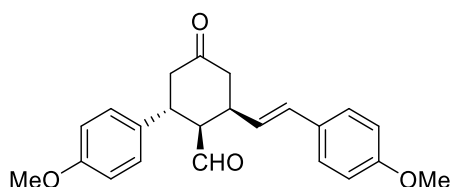

Reaction time: 30 h, white solid; 14.5 mg, 80% yield, m.p. 151-152 °C;  $^1\text{H}$  NMR (500 MHz,  $\text{CDCl}_3$ )  $\delta$  9.63 (d,  $J = 2.2$  Hz, 1H), 7.27 (d,  $J = 8.7$  Hz, 2H), 7.15 (d,  $J = 8.7$  Hz, 2H), 6.87 (d,  $J = 8.7$  Hz, 2H), 6.84 (d,  $J = 8.7$  Hz, 2H), 6.37 (dd,  $J = 16.0, 1.3$  Hz, 1H), 6.07 (dd,  $J = 16.0, 7.6$  Hz, 1H), 3.81 (s, 3H), 3.79 (s, 3H), 3.70 - 3.65 (m, 1H), 3.39 - 3.35 (m, 1H), 3.10 (ddd,  $J = 9.8, 4.2, 2.3$  Hz, 1H), 2.78-2.57 (m, 4H).  $^{13}\text{C}$  NMR (126 MHz,  $\text{CDCl}_3$ )  $\delta$  208.6, 203.6, 159.5, 158.7, 133.4, 132.7, 129.0, 128.3, 127.6, 124.1, 114.5, 114.0,

57.2, 55.3, 55.3, 47.4, 45.3, 39.6, 39.1.  $\nu_{\max}$  (neat,  $\text{cm}^{-1}$ ): 1029, 1053, 1109, 1197, 1247, 1283, 1303, 1461, 1442, 1606, 1719, 1702; HRMS (ESI,  $m/z$ ) calcd for  $\text{C}_{23}\text{H}_{25}\text{O}_4$  ( $[\text{M}+\text{H}]^+$ ): 365.1747; found: 365.1752. Enantiomeric excess of **7c'** was determined by chiral stationary phase HPLC analysis using a ChiralPak ID column (70:30 hexanes/*i*-PrOH at 0.7 mL/min,  $\lambda = 254$  nm); major isomer:  $t_{\text{R}} = 15.8$  min, minor isomer:  $t_{\text{R}} = 19.1$  min.

**(1*R*,2*R*,6*S*)-2-(4-Fluorophenyl)-6-[(*E*)-4-fluorostyryl]-4-oxocyclohexane-1-carbaldehyde (7d')**

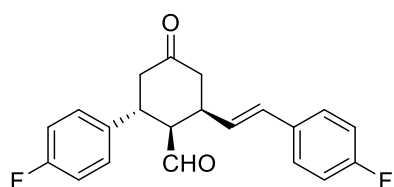

Reaction time: 30 h, white solid; 15.0 mg, 90% yield, m.p. 145-146 °C;  $^1\text{H}$  NMR (500 MHz,  $\text{CDCl}_3$ )  $\delta$  9.66 (d,  $J = 1.9$  Hz, 1H), 7.31-7.28 (m, 2H), 7.22-7.19 (m, 2H), 7.05-6.98 (m, 4H), 6.40 (d,  $J = 16.0$  Hz, 1H), 6.11 (dd,  $J = 16.0, 7.5$  Hz, 1H), 3.73-3.68 (m, 1H), 3.41-3.39 (m, 1H), 3.17-3.14 (m, 1H), 2.80-2.67 (m, 3H), 2.63-2.58 (m, 1H).  $^{13}\text{C}$  NMR (126 MHz,  $\text{CDCl}_3$ )  $\delta$  206.7, 202.5, 163.1 ( $J = 63.0$  Hz), 161.1 ( $J = 62.0$  Hz), 135.8 ( $J = 2.5$  Hz), 132.0 ( $J = 2.5$  Hz), 130.97, 128.6 ( $J = 7.6$  Hz), 128.19, 127.9 ( $J = 7.6$  Hz), 116.1 ( $J = 21.4$  Hz), 115.5 ( $J = 22.7$  Hz), 59.09, 48.17, 46.19, 43.83, 42.61.  $\nu_{\max}$  (neat,  $\text{cm}^{-1}$ ): 1043, 1074, 1159, 1225, 1365, 1420, 1509, 1600, 1704, 1713; HRMS (ESI,  $m/z$ ) calcd for  $\text{C}_{21}\text{H}_{19}\text{F}_2\text{O}_2$  ( $[\text{M}+\text{H}]^+$ ): 341.1348; found: 341.1353. Enantiomeric excess of **7d'** was determined by chiral stationary phase HPLC analysis using a ChiralPak IC column (80:20 hexanes/*i*-PrOH at 0.7 mL/min,  $\lambda = 254$  nm); minor isomer:  $t_{\text{R}} = 13.6$  min, major isomer:  $t_{\text{R}} = 16.0$  min.

**(1*R*,2*R*,6*S*)-2-(4-Chlorophenyl)-6-[(*E*)-4-chlorostyryl]-4-oxocyclohexanecarbaldehyde (7e')**

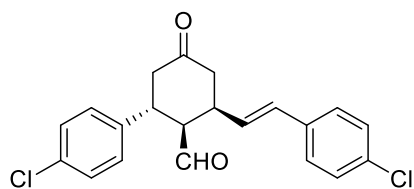

Reaction time: 48 h, white solid, 13.8 mg, 74% yield, m.p. 165-167 °C;  $^1\text{H}$  NMR (500 MHz,  $\text{CDCl}_3$ )  $\delta$  9.69 (d,  $J = 1.7$  Hz, 1H), 7.34 (d,  $J = 8.4$  Hz, 2H), 7.32-7.25 (m, 4H), 7.20 (d,  $J = 8.4$  Hz, 2H), 6.42 (d,  $J = 15.9$  Hz, 1H), 6.19 (dd,  $J = 15.9, 7.4$  Hz, 1H), 3.71 (td,  $J = 9.7, 5.4$  Hz, 1H), 3.42 (td,  $J = 5.5, 2.5$  Hz, 1H), 3.20 (ddd,  $J = 9.5, 4.2, 1.8$  Hz, 1H), 2.91-2.53 (m, 4H).  $^{13}\text{C}$  NMR (125 MHz,  $\text{CDCl}_3$ )  $\delta$  207.7, 202.2, 139.9, 134.6, 133.8, 133.3, 132.3, 129.3, 128.8, 128.7, 127.6, 127.0, 57.0, 46.7, 45.0, 39.3, 39.0.  $\nu_{\max}$  (neat,  $\text{cm}^{-1}$ ): 1013, 1091, 1216, 1227, 1356, 1491, 1591, 1725, 1735. HRMS (ESI):  $m/z$  calcd for  $\text{C}_{21}\text{H}_{19}\text{Cl}_2\text{O}_2$  ( $[\text{M}+\text{H}]^+$ ):

373.0757; Found 373.0748. Enantiomeric excess of **7e'** was determined by chiral stationary phase HPLC analysis using a ChiralPak ID column (80:20 hexanes/*i*-PrOH at 1.0 mL/min,  $\lambda = 254$  nm), major enantiomer:  $t_R = 8.9$  min, minor enantiomer:  $t_R = 10.2$  min

**(1R,2R,6S)-2-(4-Bromophenyl)-6-[(E)-4-bromostyryl]-4-oxocyclohexanecarbaldehyde (7f')**

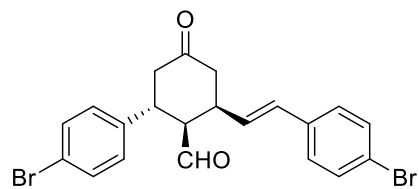

Reaction time: 48 h, white solid, 16.4 mg, 71% yield, m.p. 175-177 °C;  $^1\text{H}$  NMR (500 MHz,  $\text{CDCl}_3$ )  $\delta$  9.69 (d,  $J = 1.6$  Hz, 1H), 7.48 (dd,  $J = 20.6, 8.4$  Hz, 4H), 7.18 (dd,  $J = 34.7, 8.4$  Hz, 4H), 6.40 (d,  $J = 15.9$  Hz, 1H), 6.21 (dd,  $J = 15.9, 7.3$  Hz, 1H), 3.69 (d,  $J = 5.4$  Hz, 1H), 3.45-3.30 (m, 1H), 3.19 (ddd,  $J = 9.6, 4.2, 1.8$  Hz, 1H), 2.91-2.49 (m, 4H).  $^{13}\text{C}$  NMR (125 MHz,  $\text{CDCl}_3$ )  $\delta$  207.7, 202.1, 140.5, 135.0, 132.4, 132.3, 131.8, 129.0, 127.9, 127.1, 121.9, 121.3, 56.9, 46.7, 44.9, 39.3, 39.0.  $\nu_{\text{max}}$  (neat,  $\text{cm}^{-1}$ ): 1009, 1072, 1216, 1365, 1408, 1488, 1587, 1706, 1718. HRMS (ESI):  $m/z$  calcd for  $\text{C}_{21}\text{H}_{19}\text{Br}_2\text{O}_2$  ( $[\text{M}+\text{H}]^+$ ): 460.9746; found 460.9731. Enantiomeric excess of **7f'** was determined by chiral stationary phase HPLC analysis using a ChiralPak ID column (80:20 hexanes/*i*-PrOH at 1.0 mL/min,  $\lambda = 254$  nm), major enantiomer:  $t_R = 10.4$  min, minor enantiomer:  $t_R = 11.3$  min

**(1R,2R,6S)-2-(4-Cyanophenyl)-6-[(E)-4-cyanostyryl]-4-oxocyclohexanecarbaldehyde (7g')**

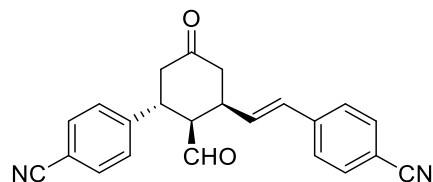

Reaction time: 48 h, white solid, 12.4 mg, 70% yield, m.p. 164-166 °C;  $^1\text{H}$  NMR (500 MHz,  $\text{CDCl}_3$ )  $\delta$  9.73 (s, 1H), 7.68 (d,  $J = 8.0$  Hz, 2H), 7.62 (d,  $J = 8.1$  Hz, 2H), 7.48 -7.41 (m, 2H), 7.39 (m, 2H), 6.50 (d,  $J = 15.9$  Hz, 1H), 6.32 (dd,  $J = 15.9, 7.1$  Hz, 1H), 3.76 (td,  $J = 9.6, 5.3$  Hz, 1H), 3.49 (d,  $J = 6.4$  Hz, 1H), 3.34 (dd,  $J = 9.4, 4.0$  Hz, 1H), 2.91-2.58 (m, 4H).  $^{13}\text{C}$  NMR (125 MHz,  $\text{CDCl}_3$ )  $\delta$  206.7, 200.7, 146.8, 140.3, 132.9, 132.5, 132.2, 130.1, 128.2, 127.0, 118.7, 118.3, 111.6, 111.5, 56.7, 46.2, 44.6, 39.8, 38.6.  $\nu_{\text{max}}$  (neat,  $\text{cm}^{-1}$ ): 1009, 1176, 1216, 1356, 1412, 1605, 1703, 1713, 2226. HRMS (ESI):  $m/z$  calcd for  $\text{C}_{23}\text{H}_{19}\text{N}_2\text{O}_2$  ( $[\text{M}+\text{H}]^+$ ): 355.1441; Found 355.1433. Enantiomeric excess of **7g'** was determined by chiral stationary phase HPLC analysis using a ChiralPak ID column (70:30 hexanes/*i*-PrOH at 1.0 mL/min,  $\lambda = 254$  nm), minor enantiomer:  $t_R = 28.9$  min, major enantiomer:  $t_R = 31.6$  min

**(1*R*,2*R*,6*S*)-2-(4-Nitrophenyl)-6-[(*E*)-4-nitrostyryl]-4-oxocyclohexane-1-carbaldehyde (7*h*'**

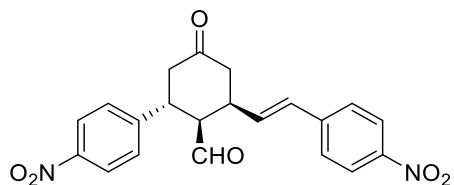

Reaction time: 48 h, pale yellow solid; 15.2 mg, 77% yield, m.p. 150-151 °C; <sup>1</sup>H NMR (500 MHz, CDCl<sub>3</sub>) δ 9.74 (d, *J* = 1.2 Hz, 1H), 8.23 (d, *J* = 8.7 Hz, 2H), 8.18 (d, *J* = 8.7 Hz, 2H), 7.46 (d, *J* = 8.7 Hz, 2H), 7.44 (d, *J* = 8.7 Hz, 2H), 6.54 (dd, *J* = 16.0, 1.3 Hz, 1H), 6.35 (dd, *J* = 16.0, 7.2 Hz, 1H), 3.83-3.78 (m, 1H), 3.52-3.48 (m, 1H), 3.37 (ddd, *J* = 9.5, 4.1, 1.3 Hz, 1H), 2.89-2.74 (m, 3H), 2.66 (dd, *J* = 15.2, 10.0 Hz, 1H). <sup>13</sup>C NMR (126 MHz, CDCl<sub>3</sub>) δ 206.5, 200.5, 148.8, 147.3, 147.2, 142.2, 131.9, 130.9, 128.3, 127.1, 124.4, 124.1, 56.8, 46.2, 44.6, 39.7, 38.6.  $\nu_{\max}$  (neat, cm<sup>-1</sup>): 1010, 1107, 1241, 1298, 1342, 1517, 1593, 1706, 1718; HRMS (ESI, *m/z*) calcd for C<sub>21</sub>H<sub>19</sub>N<sub>2</sub>O<sub>6</sub> ([*M*+*H*]<sup>+</sup>): 395.1238; found: 395.1243. Enantiomeric excess of **7*h*'** was determined by chiral stationary phase HPLC analysis using a ChiralPak ID column (70:30 hexanes/*i*-PrOH at 1.0 mL/min,  $\lambda$  = 254 nm); minor isomer: *t*<sub>R</sub> = 42.6 min, major isomer: *t*<sub>R</sub> = 44.9 min.

**(1*R*,2*R*,6*S*)-2-(2-Methoxyphenyl)-6-[(*E*)-2-methoxystyryl]-4-oxocyclohexane-1-carbaldehyde (7*i*'**

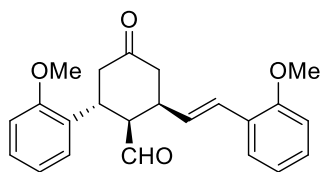

Reaction time: 30 h, white solid; 15.6 mg, 86% yield, m.p. 150-152 °C; <sup>1</sup>H NMR (500 MHz, CDCl<sub>3</sub>) δ 9.71 (d, *J* = 2.0 Hz, 1H), 7.38 (dd, *J* = 7.6, 1.7 Hz, 1H), 7.27-7.20 (m, 2H), 7.14 (dd, *J* = 7.6, 1.7 Hz, 1H), 6.95-6.84 (m, 4H), 6.74 (dd, *J* = 16.0, 1.3 Hz, 1H), 6.30 (dd, *J* = 16.0, 7.5 Hz, 1H), 4.13 (q, *J* = 7.6 Hz, 1H), 3.84 (s, 3H), 3.82 (s, 3H), 3.31-3.25 (m, 2H), 2.76 – 2.72 (m, 3H), 2.68-2.64 (m, 1H). <sup>13</sup>C NMR (126 MHz, CDCl<sub>3</sub>) δ 209.5, 204.1, 156.7, 156.6, 129.7, 128.9, 128.6, 128.4, 127.9, 127.5, 126.8, 125.5, 120.9, 120.6, 110.9, 110.8, 55.4, 55.3, 55.2, 45.2, 44.5, 39.7, 34.2.  $\nu_{\max}$  (neat, cm<sup>-1</sup>): 1030, 1107, 1185, 1240, 1269, 1291, 1423, 1455, 1486, 1577, 1705, 1719; HRMS (ESI, *m/z*) calcd for C<sub>23</sub>H<sub>25</sub>O<sub>4</sub> ([*M*+*H*]<sup>+</sup>): 365.1746; found: 365.1747. Enantiomeric excess of **7*i*'** was determined by chiral stationary phase HPLC analysis using a ChiralPak IC column (85:15 hexanes/*i*-PrOH at 0.7 mL/min,  $\lambda$  = 254 nm); major isomer: *t*<sub>R</sub> = 24.4 min, minor isomer: *t*<sub>R</sub> = 29.9 min.

**(1*R*,2*R*,6*S*)-2-(3-Methoxyphenyl)-6-[(*E*)-3-methoxystyryl]-4-oxocyclohexane-1-carbaldehyde (7*j*' )**

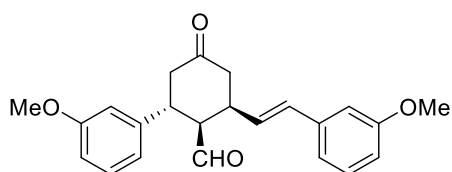

Reaction time: 30 h, white solid; 14.6 mg, 81% yield, m.p. 157-158 °C; <sup>1</sup>H NMR (500 MHz, CDCl<sub>3</sub>) δ 9.65 (d, *J* = 1.9 Hz, 1H), 7.28-7.21 (m, 2H), 6.93 (d, *J* = 7.6 Hz, 1H), 6.86 (t, *J* = 2.0 Hz, 1H), 6.83-6.79 (m, 3H), 6.77-6.76 (m, 1H), 6.41 (d, *J* = 15.9 Hz, 1H), 6.21 (dd, *J* = 15.9, 7.4 Hz, 1H), 3.81 (s, 3H), 3.80 (s, 3H), 3.71-3.66 (m, 1H), 3.43-3.40 (m, 1H), 3.17-3.14 (m, 1H), 2.79-2.61 (m, 4H). <sup>13</sup>C NMR (126 MHz, CDCl<sub>3</sub>) δ 208.2, 203.1, 160.1, 159.8, 143.0, 137.7, 133.3, 130.2, 129.6, 126.9, 119.5, 119.0, 113.6, 113.4, 112.5, 111.8, 56.9, 55.3, 55.2, 47.0, 45.1, 39.8, 39.3. *v*<sub>max</sub> (neat, cm<sup>-1</sup>): 1033, 1185, 1244, 1292, 1262, 1427, 1450, 1488, 1587, 1704, 1720; HRMS (ESI, *m/z*) calcd for C<sub>23</sub>H<sub>25</sub>O<sub>4</sub> ([*M*+*H*]<sup>+</sup>): 365.1747; found: 365.1754. Enantiomeric excess of **7*j*'** was determined by chiral stationary phase HPLC analysis using a ChiralPak IB column (90:10 hexanes/*i*-PrOH at 1.0 mL/min, λ = 254 nm); minor isomer: *t*<sub>R</sub> = 42.5 min, major isomer: *t*<sub>R</sub> = 63.2 min.

**(1*R*,2*R*,6*S*)-2-(4-Acetoxy-3-methoxyphenyl)-6-[(*E*)-4-acetoxy-3-methoxystyryl]-4-oxocyclohexane-1-carbaldehyde (7*k*' )**

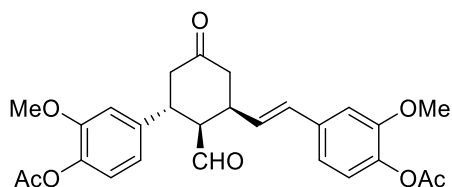

Reaction time: 32 h, white solid; 20.0 mg, 83% yield, m.p. 175-176 °C; <sup>1</sup>H NMR (500 MHz, CDCl<sub>3</sub>) δ 9.69 (d, *J* = 1.7 Hz, 1H), 7.02-6.97 (m, 2H), 6.94-6.90 (m, 2H), 6.81-6.80 (m, 2H), 6.41 (dd, *J* = 16.0, 1.3 Hz, 1H), 6.16 (dd, *J* = 16.0, 7.1 Hz, 1H), 3.85 (s, 3H), 3.83 (s, 3H), 3.77-3.67 (m, 1H), 3.42-3.38 (m, 1H), 3.17-3.14 (m, 1H), 2.78-2.71 (m, 3H), 2.65-2.60 (m, 1H), 2.31 (s, 3H), 2.30 (s, 3H). <sup>13</sup>C NMR (126 MHz, CDCl<sub>3</sub>) δ 208.2, 202.9, 169.1, 169.0, 151.4, 151.2, 140.3, 139.5, 138.9, 135.3, 132.8, 127.0, 123.4, 122.9, 119.0, 118.9, 111.8, 110.3, 56.9, 55.9, 46.8, 44.8, 39.7, 39.0, 20.7. *v*<sub>max</sub> (neat, cm<sup>-1</sup>): 1063, 1072, 1213, 1365, 1202, 1216, 1226, 1478, 1597, 1664, 1701, 1725, 1735, 1751; HRMS (ESI, *m/z*) calcd for C<sub>27</sub>H<sub>29</sub>O<sub>8</sub> ([*M*+*H*]<sup>+</sup>): 481.1857; found: 481.1868. Enantiomeric excess of **7*k*'** was determined by chiral stationary phase HPLC analysis using a ChiralPak IB column (60:40 hexanes/*i*-PrOH at 1 mL/min, λ = 254 nm); minor isomer: *t*<sub>R</sub> = 18.2 min, major isomer: *t*<sub>R</sub> = 26.9 min.



**(1*R*,2*R*,6*S*)-2-(Naphthalen-1-yl)-6-[(*E*)-2-(naphthalen-1-yl)vinyl]-4-oxocyclohexane-1-carbaldehyde (7l')**

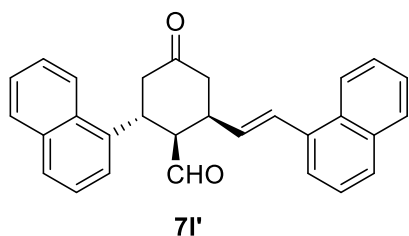

Reaction time: 48 h, white solid; 16.5 mg, 82% yield, m.p. 154-155 °C; <sup>1</sup>H NMR (500 MHz, CDCl<sub>3</sub>) δ 9.88 (d, *J* = 1.5 Hz, 1H), 8.06 – 7.96 (m, 2H), 7.93 – 7.87 (m, 1H), 7.87 – 7.76 (m, 3H), 7.56 – 7.46 (m, 6H), 7.45 – 7.35 (m, 2H), 7.24 – 7.16 (m, 1H), 6.33 (dd, *J* = 15.7, 6.8 Hz, 1H), 4.75 (q, *J* = 7.0 Hz, 1H), 3.52 – 3.37 (m, 2H), 2.97 (dddd, *J* = 29.7, 14.9, 5.5, 1.4 Hz, 2H), 2.81 (dddd, *J* = 35.7, 15.7, 7.6, 1.4 Hz, 2H). <sup>13</sup>C NMR (125 MHz, CDCl<sub>3</sub>) δ 208.9, 203.3, 137.7, 134.2, 134.1, 133.5, 131.0, 130.8, 130.6, 130.5, 129.3, 128.5, 128.3, 128.1, 126.8, 126.3, 126.0, 125.9, 125.5, 125.5, 124.4, 123.9, 123.6, 122.2, 55.9, 45.7, 44.8, 39.1.  $\nu_{\max}$  (neat, cm<sup>-1</sup>): 969, 1013, 1234, 1394, 1508, 1596, 1709. HRMS (ESI, *m/z*) calcd for C<sub>29</sub>H<sub>25</sub>O<sub>2</sub> ([M+H]<sup>+</sup>): 405.1849; found: 405.1845. Enantiomeric excess of **7l'** was determined by chiral stationary phase HPLC analysis using a ChiralPak IC column (80:20 hexanes/*i*-PrOH at 1.0 mL/min,  $\lambda$  = 220 nm); minor isomer: *t<sub>R</sub>* = 23.0 min, major isomer: *t<sub>R</sub>* = 15.1 min.

**(1*R*,2*R*,6*S*)-4-Oxo-2-(thiophen-2-yl)-6-[(*E*)-2-(thiophen-2-yl)vinyl]cyclohexanecarbaldehyde (7m')**

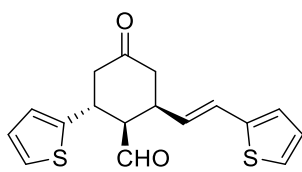

Reaction time: 72 h, white solid, 7.9 mg, 50% yield, m.p. 161-163 °C; <sup>1</sup>H NMR (500 MHz, CDCl<sub>3</sub>) δ 9.83 (d, *J* = 1.6 Hz, 1H), 7.28-7.10 (m, 2H), 7.01-6.85 (m, 4H), 6.59 (dd, *J* = 15.8, 1.4 Hz, 1H), 6.11 (dd, *J* = 15.8, 7.2 Hz, 1H), 4.14-4.02 (m, 1H), 3.40-3.25 (m, 1H), 3.20-3.08 (m, 1H), 2.89 (ddd, *J* = 15.4, 5.8, 1.5 Hz, 1H), 2.79-2.57 (m, 3H). <sup>13</sup>C NMR (125 MHz, CDCl<sub>3</sub>) δ 207.4, 202.5, 145.1, 141.2, 127.5, 127.2, 126.3, 126.3, 126.2, 125.3, 124.7, 124.6, 57.9, 46.5, 44.6, 38.8, 35.5.  $\nu_{\max}$  (neat, cm<sup>-1</sup>): 1008, 1216, 1227, 1365, 1426, 1725, 1735. HRMS (ESI): *m/z* calcd for C<sub>17</sub>H<sub>17</sub>O<sub>2</sub>S<sub>2</sub> ([M+H]<sup>+</sup>): 317.0664; Found 317.0659. Enantiomeric excess of **7m'** was determined by chiral stationary phase HPLC analysis using a ChiralPak ID column (80:20 hexanes/*i*-PrOH at 1.0 mL/min,  $\lambda$  = 254 nm), minor enantiomer: *t<sub>R</sub>* = 12.8 min, major enantiomer: *t<sub>R</sub>* = 14.7 min

**(1*R*,2*S*,3*R*,6*S*)-3-Methyl-4-oxo-2-phenyl-6-[(*E*)-styryl]cyclohexane-1-carbaldehyde (7n')**

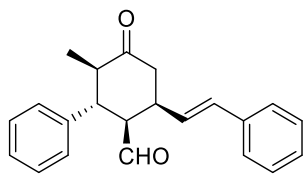

Reaction time: 168 h, white solid, 3.5 mg, 22% yield, m.p. 147-148 °C;  $^1\text{H}$  NMR (500 MHz,  $\text{CDCl}_3$ )  $\delta$  9.96 (s, 1H), 7.37-7.20 (m, 10H), 7.09 (d,  $J = 7.2$  Hz, 4H), 6.38-6.35 (m, 1H), 3.95-3.93 (m, 1H), 3.30-3.26 (m, 1H), 3.01-2.99 (s, 1H), 2.87-2.80 (m, 2H), 2.71-2.66 (m, 1H), 1.01 (d,  $J = 6.8$  Hz, 3H).  $^{13}\text{C}$  NMR (126 MHz,  $\text{CDCl}_3$ )  $\delta$  211.5, 203.2, 139.8, 136.4, 131.9, 128.8, 128.7, 128.6, 128.2, 127.8, 127.2, 126.4, 126.3, 56.9, 45.9, 45.1, 43.6, 12.4.  $\nu_{\text{max}}$  (neat,  $\text{cm}^{-1}$ ): 1002, 1173, 1226, 1249, 1365, 1410, 1419, 1512, 1701, 1719. HRMS (ESI):  $m/z$  calcd for  $\text{C}_{22}\text{H}_{23}\text{O}_2$  ( $[\text{M}+\text{H}]^+$ ): 319.1693; Found 319.1694. Enantiomeric excess of **7n'** was determined by chiral stationary phase HPLC analysis using a ChiralPak IB column (85:15 hexanes/*i*-PrOH at 1.0 mL/min,  $\lambda = 254$  nm), minor enantiomer:  $t_{\text{R}} = 10.1$  min, major enantiomer:  $t_{\text{R}} = 18.6$  min

**(3*E*,5*E*)-6-Phenylhexa-3,5-dien-2-one (12)**<sup>16</sup>

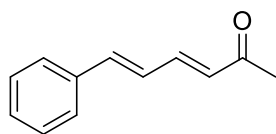

Yellow solid, 980 mg, 57% yield.  $^1\text{H}$  NMR (500 MHz,  $\text{CDCl}_3$ )  $\delta$  7.50 (dt,  $J = 6.2, 1.4$  Hz, 2H), 7.42 – 7.26 (m, 4H), 7.01 – 6.86 (m, 2H), 6.28 (d,  $J = 15.5$  Hz, 1H), 2.34 (s, 3H).  $^{13}\text{C}$  NMR (126 MHz,  $\text{CDCl}_3$ )  $\delta$  198.4, 143.4, 141.3, 136.0, 130.5, 129.2, 128.9, 127.3, 126.7, 27.4.

**Methyl (E)-3-((1*R*,2*R*,6*S*)-2-(4-Methoxyphenyl)-6-[(*E*)-4-methoxystyryl]-4-oxocyclohexyl)acrylate (14)**

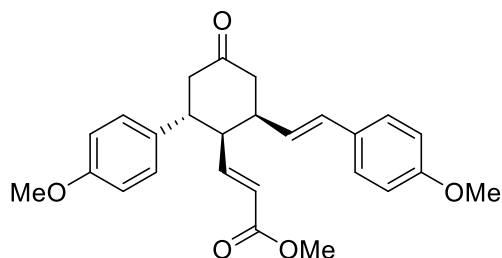

White solid; 9.0 mg, 86% yield, m.p. 180-182 °C;  $^1\text{H}$  NMR (500 MHz,  $\text{CDCl}_3$ )  $\delta$  7.34-7.24 (m, 2H), 7.11-6.93 (m, 2H), 6.86-6.82 (m, 5H), 6.35 (d,  $J = 15.9$  Hz, 1H), 6.01 (dd,  $J = 15.9, 7.2$  Hz, 1H), 5.78 (d,  $J = 15.7$  Hz, 1H), 3.80 (d,  $J = 16.2$  Hz, 6H), 3.66 (s, 3H), 3.26-3.21 (m, 1H), 3.14-2.97 (m, 2H), 2.82-2.51 (m, 4H).  $^{13}\text{C}$  NMR (126 MHz,  $\text{CDCl}_3$ )  $\delta$  209.3, 166.5, 159.5, 158.6, 148.9, 134.3, 132.8, 129.6, 128.4, 127.7, 124.9, 123.4, 114.4, 114.1, 55.5, 55.4, 51.7, 49.3, 48.1, 45.7, 43.5, 43.4.  $\nu_{\text{max}}$  (neat,  $\text{cm}^{-1}$ ): 1033, 1175, 1249, 1304, 1437, 1512, 1582, 1653, 1685, 1718, 1751, 2953; HRMS (ESI,  $m/z$ ) calcd for  $\text{C}_{26}\text{H}_{29}\text{O}_5$  ( $[\text{M}+\text{H}]^+$ ): 421.2010; found: 421.2017. Enantiomeric excess of **14** was determined by chiral stationary phase HPLC analysis using a ChiralPak ID column (70:30 hexanes/*i*-PrOH at 1.0 mL/min,  $\lambda = 254$  nm), major enantiomer:  $t_{\text{R}} = 14.4$  min, minor enantiomer:  $t_{\text{R}} = 19.6$  min

**(3*R*,4*S*,4*aR*,8*R*,8*aS*)-4-Bromo-3,8-bis(4-methoxyphenyl)octahydro-6*H*-isochromen-6-one**  
**(15)**

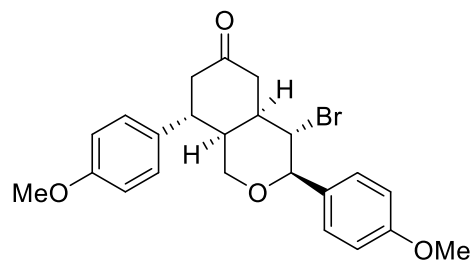

Colorless oil, 10.5 mg, 62% yield; <sup>1</sup>H NMR (500 MHz, CDCl<sub>3</sub>) δ 7.35 (d, *J* = 8.7 Hz, 2H), 7.21 (d, *J* = 8.7 Hz, 2H), 6.92 (dd, *J* = 13.9, 8.7 Hz, 4H), 4.41 (d, *J* = 10.0 Hz, 1H), 4.04 (dd, *J* = 11.6, 10.0 Hz, 1H), 3.83 (d, *J* = 11.1 Hz, 6H), 3.75 (dd, *J* = 11.8, 1.3 Hz, 1H), 3.66 (dd, *J* = 11.8, 2.3 Hz, 1H), 3.55 (td, *J* = 12.8, 4.6 Hz, 1H), 3.14 – 3.07 (m, 1H), 2.86 (ddd, *J* = 11.5, 4.5, 1.8 Hz, 1H), 2.81 – 2.73 (m, 2H), 2.67 (ddd, *J* = 14.0, 4.8, 2.4 Hz, 1H), 2.34 (ddt, *J* = 12.2, 4.0, 1.7 Hz, 1H). <sup>13</sup>C NMR (126 MHz, CDCl<sub>3</sub>) δ 208.6, 159.8, 158.7, 133.6, 131.4, 128.7, 128.4, 114.3, 113.8, 85.6, 68.9, 55.5, 55.3, 48.4, 46.4, 45.2, 44.5, 41.2. *v*<sub>max</sub> (neat, cm<sup>-1</sup>): 1211, 1219, 1259, 1354, 1369, 1460, 1472, 1566, 1718, 2971, 3280; HRMS (ESI, *m/z*) calcd for C<sub>23</sub>H<sub>25</sub>NaBrO<sub>4</sub> ([*M*+*Na*]<sup>+</sup>): 467.0828; found: 467.0826. Enantiomeric excess of **16** was determined by chiral stationary phase HPLC analysis using a ChiralPak OD-H column (70:30 hexanes/*i*-PrOH at 1.0 mL/min, λ = 254 nm); major isomer: *t*<sub>R</sub> = 16.5 min, minor isomer: *t*<sub>R</sub> = 22.5 min.

**(3*R*,4*R*,5*S*)-4-(Hydroxymethyl)-3-(4-methoxyphenyl)-5-[(*E*)-4-methoxystyryl]cyclohexan-1-one**  
**(16)**

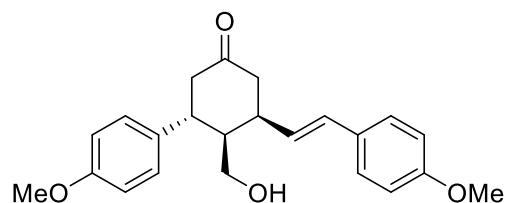

Colorless oil, 7.5 mg, 75% yield; <sup>1</sup>H NMR (500 MHz, CDCl<sub>3</sub>) δ 7.33 (d, *J* = 8.7 Hz, 2H), 7.16 (d, *J* = 8.6 Hz, 2H), 6.88 (dd, *J* = 8.8, 2.6 Hz, 4H), 6.50 (d, *J* = 15.8 Hz, 1H), 6.09 (dd, *J* = 15.8, 8.6 Hz, 1H), 3.83 (d, *J* = 6.1 Hz, 7H), 3.42 (dd, *J* = 25.6, 4.5 Hz, 3H), 3.03 (td, *J* = 11.0, 6.4 Hz, 1H), 2.81 (dd, *J* = 14.1, 5.7 Hz, 1H), 2.68 – 2.57 (m, 3H), 2.45 (dt, *J* = 11.2, 5.7 Hz, 1H). <sup>13</sup>C NMR (75 MHz, CDCl<sub>3</sub>) δ 210.2, 159.3, 158.6, 134.4, 132.3, 129.6, 128.3, 128.1, 127.5, 125.2, 114.3, 114.0, 63.1, 55.3, 55.3, 49.2, 47.7, 46.4, 41.9, 40.6. *v*<sub>max</sub> (neat, cm<sup>-1</sup>): 1048, 1169, 1235, 1305, 1350, 1471, 1523, 1606, 1620, 1709, 2931, 3269. HRMS (ESI, *m/z*) calcd for C<sub>23</sub>H<sub>27</sub>O<sub>4</sub> ([*M*+*H*]<sup>+</sup>): 367.1904; found: 367.1903.

**(*E*)-4-Hydroxy-6-phenylhex-5-en-2-one (17)**<sup>17</sup>

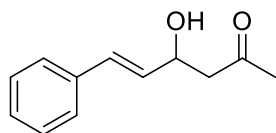

Colorless oil, 400 mg, 17% yield.  $^1\text{H}$  NMR (500 MHz,  $\text{CDCl}_3$ )  $\delta$  7.40 (d,  $J = 7.1$  Hz, 2H), 7.34 (t,  $J = 7.6$  Hz, 2H), 7.29 – 7.26 (m, 1H), 6.66 (dd,  $J = 15.9, 1.4$  Hz, 1H), 6.23 (dd,  $J = 15.9, 6.1$  Hz, 1H), 4.78 (dd,  $J = 6.1, 1.4$  Hz, 1H), 2.78 (d,  $J = 6.1$  Hz, 2H), 2.23 (s, 3H).  $^{13}\text{C}$  NMR (126 MHz,  $\text{CDCl}_3$ )  $\delta$  209.0, 136.5, 130.4, 130.1, 128.6, 127.8, 126.5, 68.5, 50.0, 30.9.

**(3a*R*\*,4*R*\*,6*S*\*,6a*S*\*)-2-Benzyl-6-(2-chlorophenyl)-4-methyl-4-[(*E*)-styryl]tetrahydro-pyrrolo[3,4-*c*]pyrrole-1,3(2*H*,3a*H*)-dione (20)**

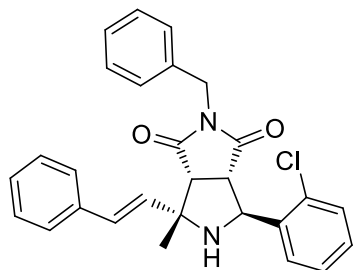

White solid, 70.4 mg, 77% yield, m.p. 150-152 °C;  $^1\text{H}$  NMR (300 MHz,  $\text{CDCl}_3$ )  $\delta$  7.48 – 7.30 (m, 6H), 7.30 – 7.09 (m, 8H), 6.63 (d,  $J = 16.0$  Hz, 1H), 6.48 (d,  $J = 15.9$  Hz, 1H), 5.12 (d,  $J = 7.8$  Hz, 1H), 4.45 (q,  $J = 14.0$  Hz, 2H), 3.76 (t,  $J = 7.8$  Hz, 1H), 3.14 (d,  $J = 7.8$  Hz, 1H), 1.59 (s, 3H), 1.50 (s, 1H).;  $^{13}\text{C}$  NMR (75 MHz,  $\text{CDCl}_3$ )  $\delta$  175.2, 174.4, 136.9, 136.1, 135.8, 133.5, 133.3, 128.8, 128.6, 128.6, 128.4, 128.1, 127.6, 127.5, 127.3, 126.5, 62.9, 57.9, 55.0, 47.3, 42.1, 27.5;  $\nu_{\text{max}}$ : (neat,  $\text{cm}^{-1}$ ): 3688 (br), 3313, 2929, 2851, 2323, 1774, 1701, 1492, 1396, 1334, 1311, 1282, 1198, 1101, 1038, 1027. Analytic calcd. for  $\text{C}_{28}\text{H}_{25}\text{ClN}_2\text{O}_2$ : C, 73.60; H, 5.51; N, 6.13; found: C, 73.72; H, 5.67; N, 6.04. Enantiomeric excess of **20** was determined by chiral stationary phase HPLC analysis using a ChiralPak AD-H column (90:10 hexanes/*i*-PrOH at 1.0 mL/min,  $\lambda = 254$  nm); major isomer:  $t_{\text{R}} = 13.09$  min, minor isomer:  $t_{\text{R}} = 10.50$  min.

## 7. Additional References

- (15) (a) Vakulya, B.; Varga, S.; Csámpai, A.; Soós, T. *Org. Lett.* **2005**, *7*, 1967-1969; (b) Liu, Y.; Sun, B.; Wang, B.; Wakem, M.; Deng, L. *J. Am. Chem. Soc.* **2009**, *131*, 418-419; (c) Malerich, J. P.; Hagihara, K.; Rawal, V. H. *J. Am. Chem. Soc.* **2008**, *130*, 14416–14417; (d) Hajra, S.; Jana, B. *Org. Lett.* **2017**, *19*, 4778-4781; (e) Pozo, S. Del.; Vera, S.; Oiarbide, M.; Palomo, C. *J. Am. Chem. Soc.* **2017**, *139*, 15308-15311.
- (16) Li, C.; Lu, W.; Lu, B.; Li, W.; Xie, X.; Zhang, Z. *J. Org. Chem.* **2019**, *84*, 16086-16094.
- (17) Acetti, D.; Brenna, E.; Fuganti, C.; Gatti, F. G.; Serra, S. *Eur. J. Org. Chem.* **2010**, 142-151.
- (18) (a) Parella, R.; Jakkampudi, S.; Arman, H.; Zhao, J. C.-G. *Adv. Synth. Catal.*, **2019**, *361*, 208-213. (b) Jakkampudi, S.; Parella, R.; Zhao, John C.-G. *Org. Biomol. Chem.*, **2019**, *17*, 151-155.

## 8. NMR Spectra

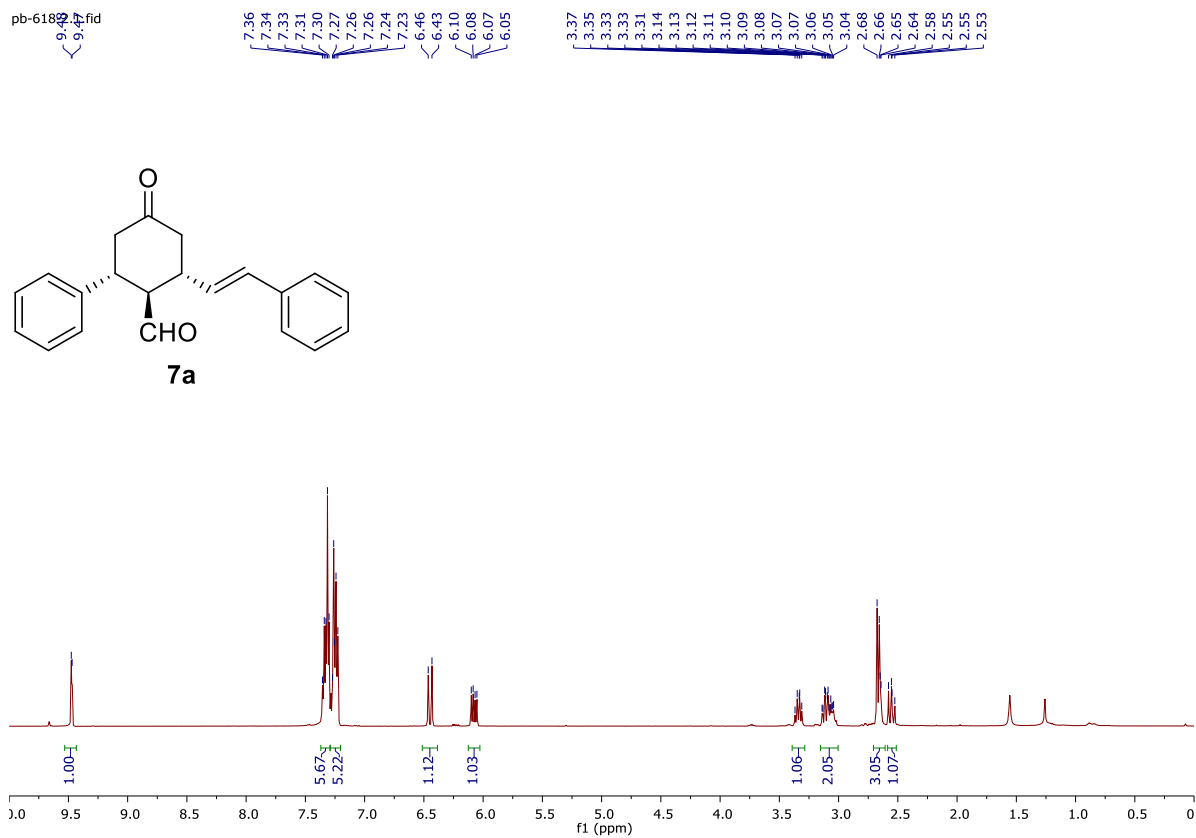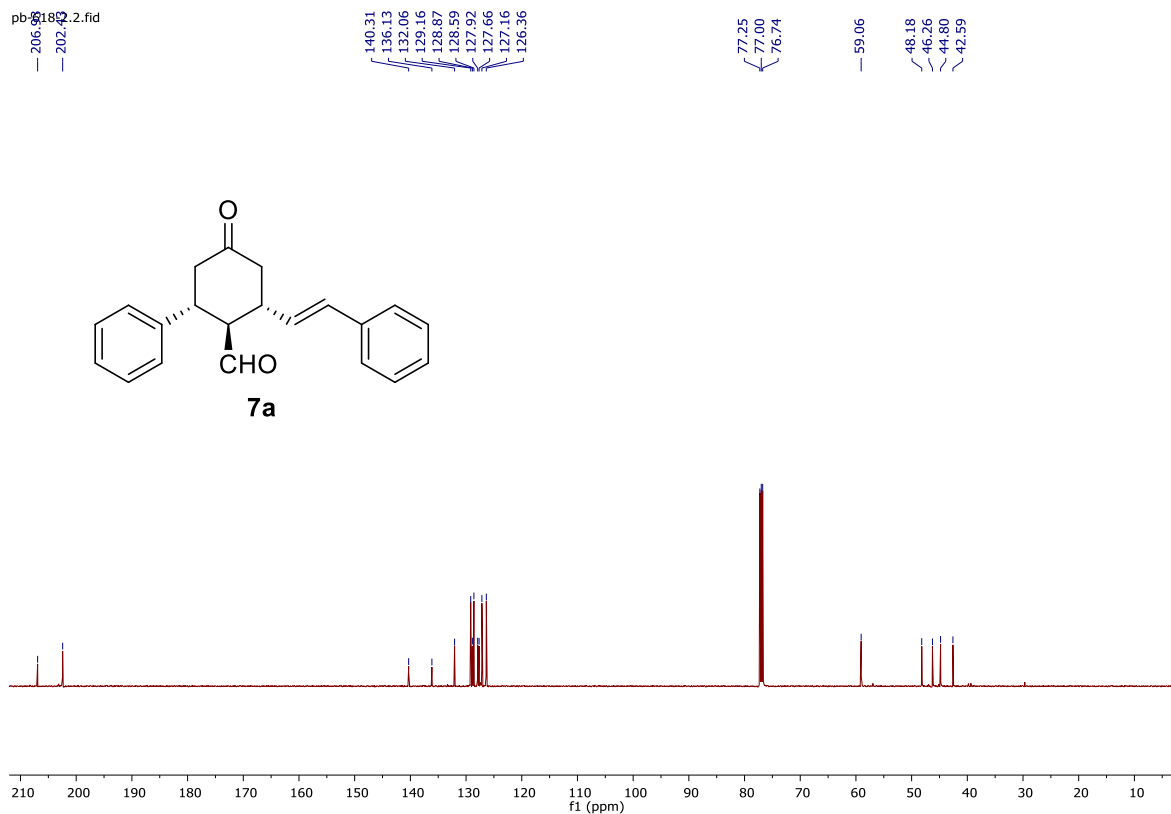

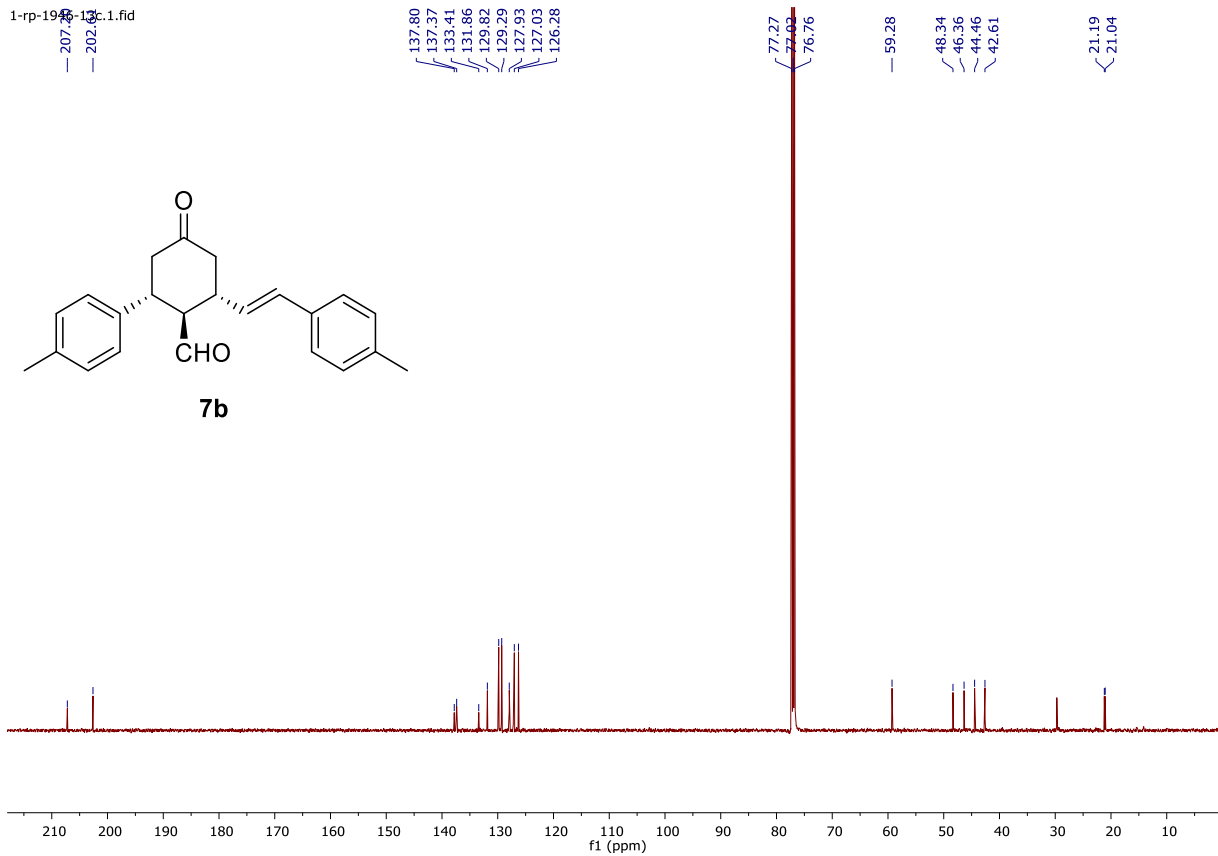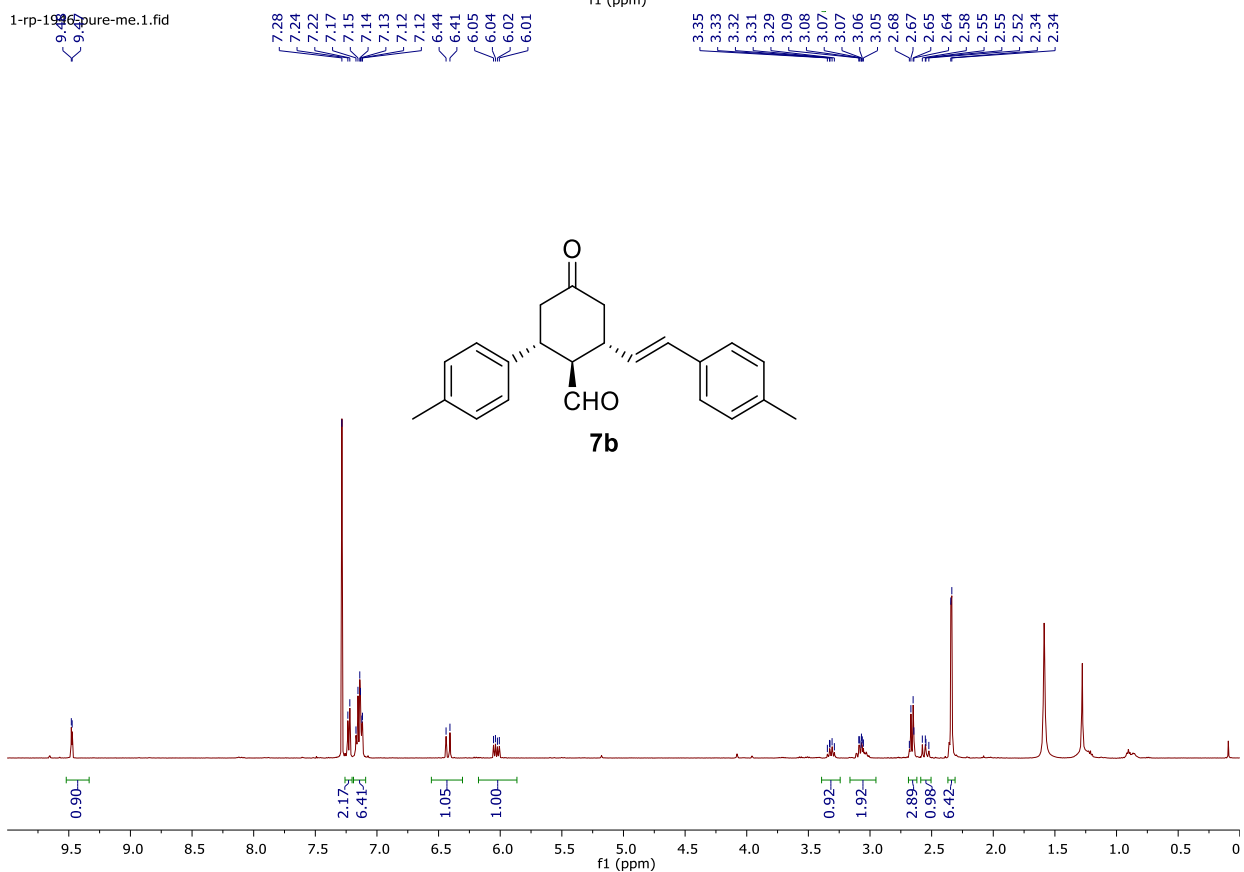

iii-pb-428.fid

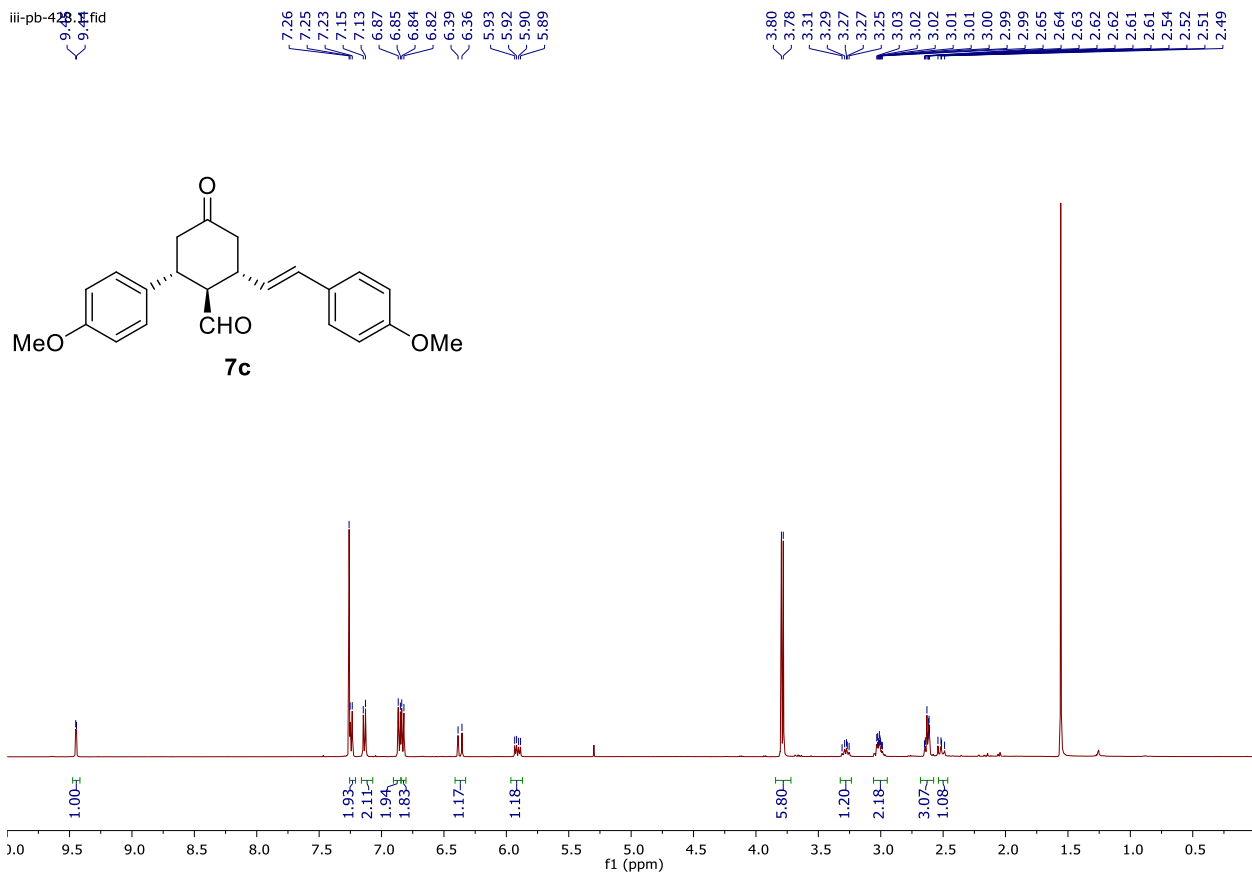

iii-pb-428.2.fid

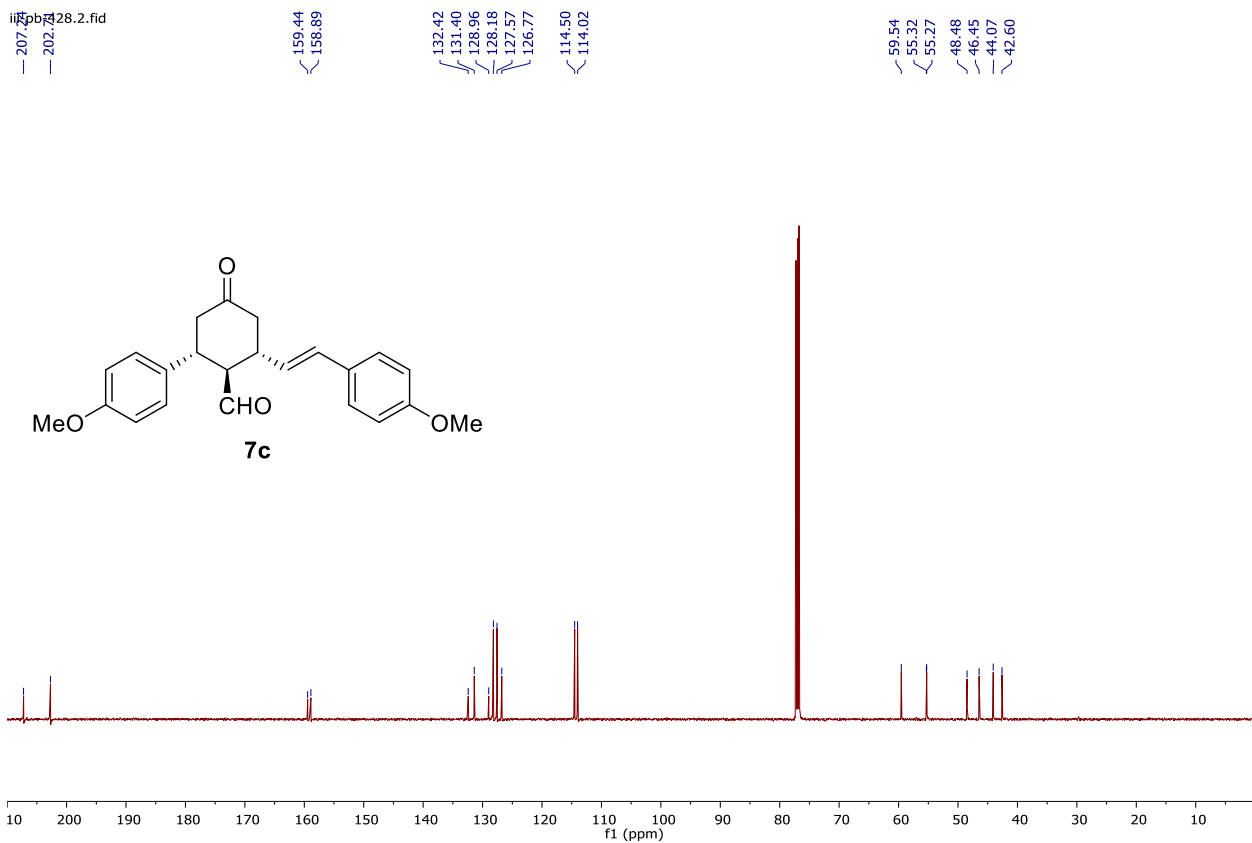



pb-672-2.2.fid

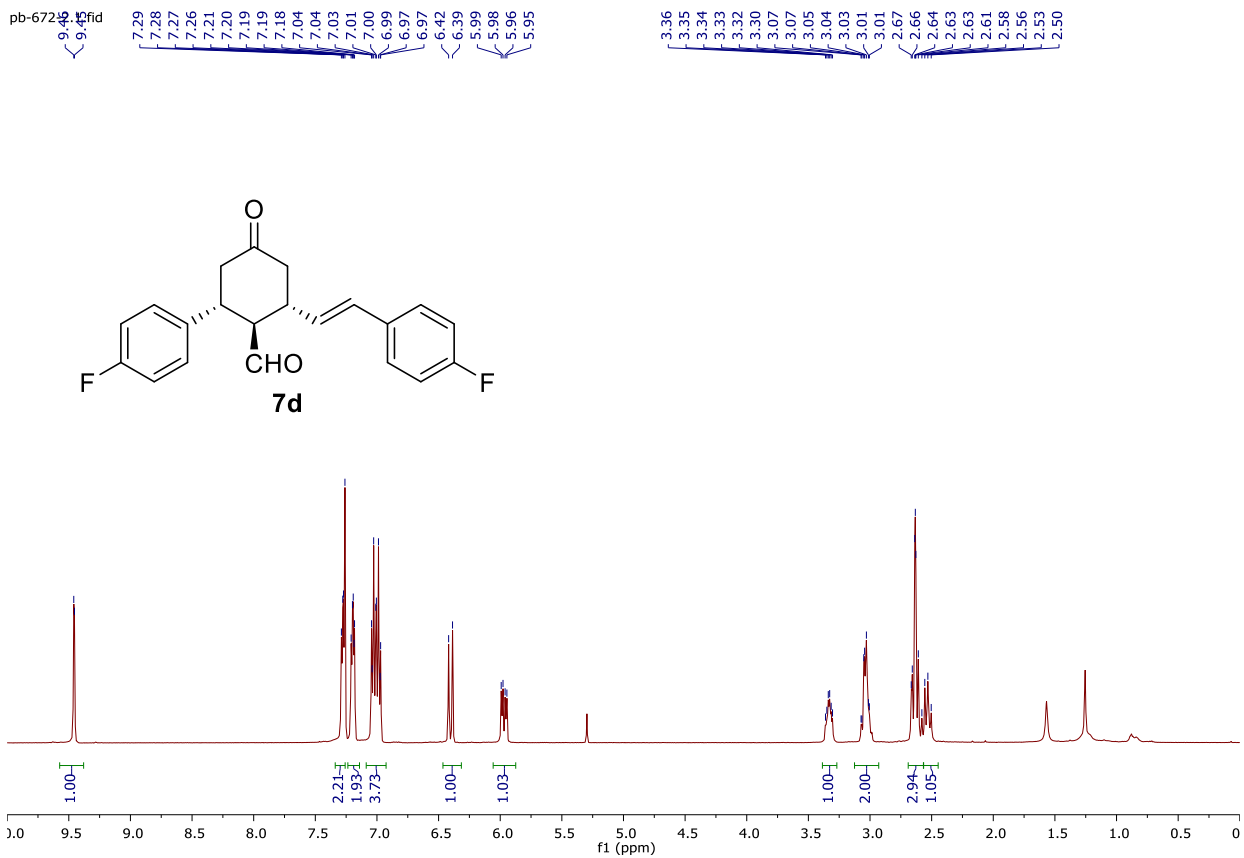

pb-672-2.2.fid

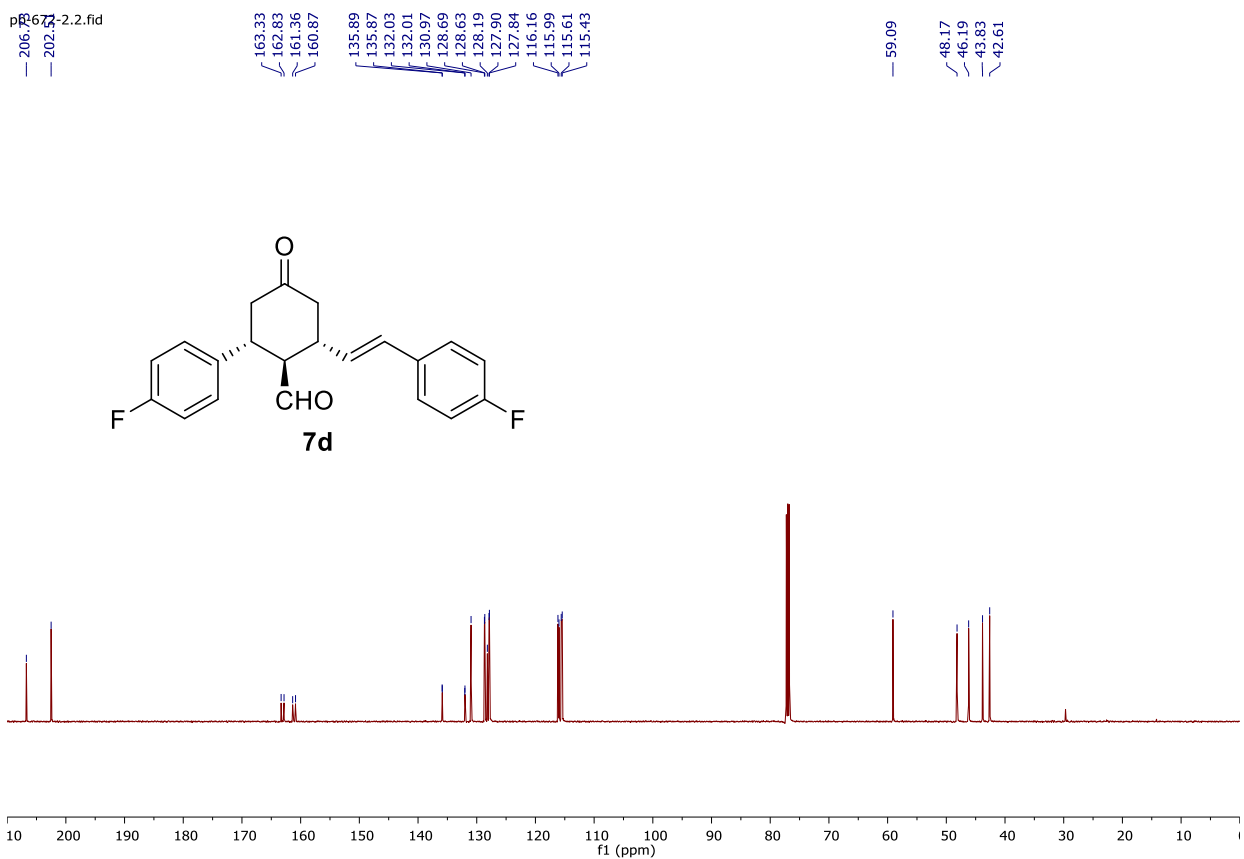

iv-pb-719-1.3.fid

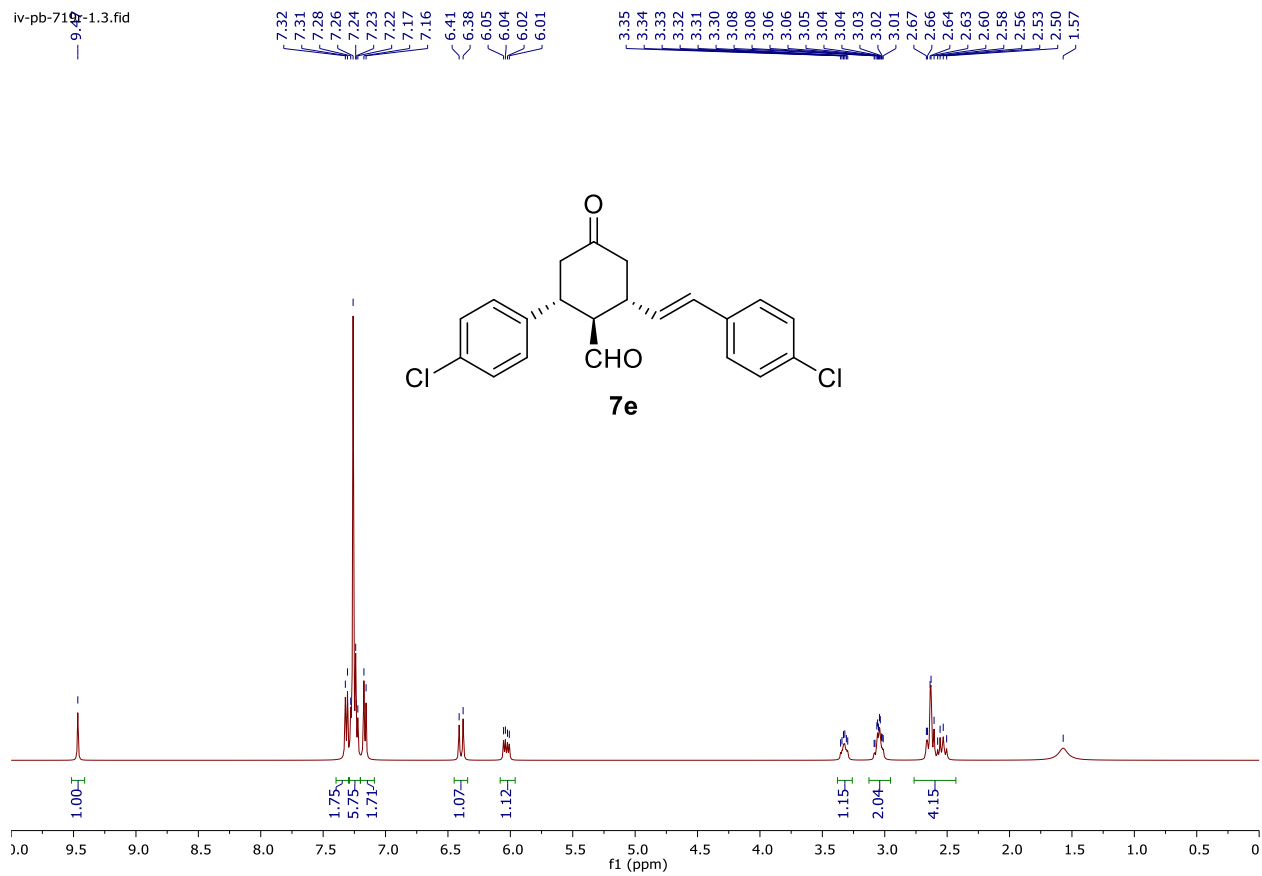

IV-206-19-C.3.fid

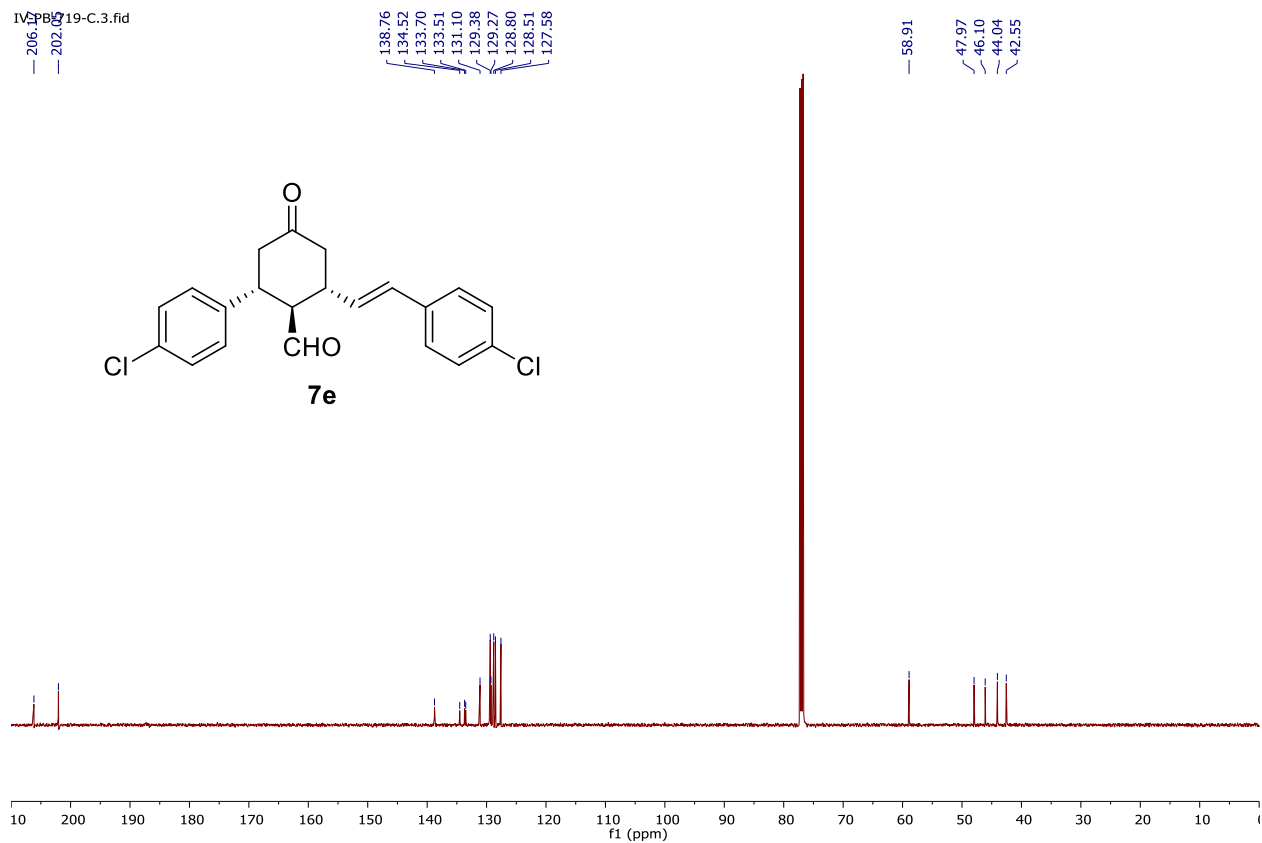

IV-PB-721-1-pure.1.fid

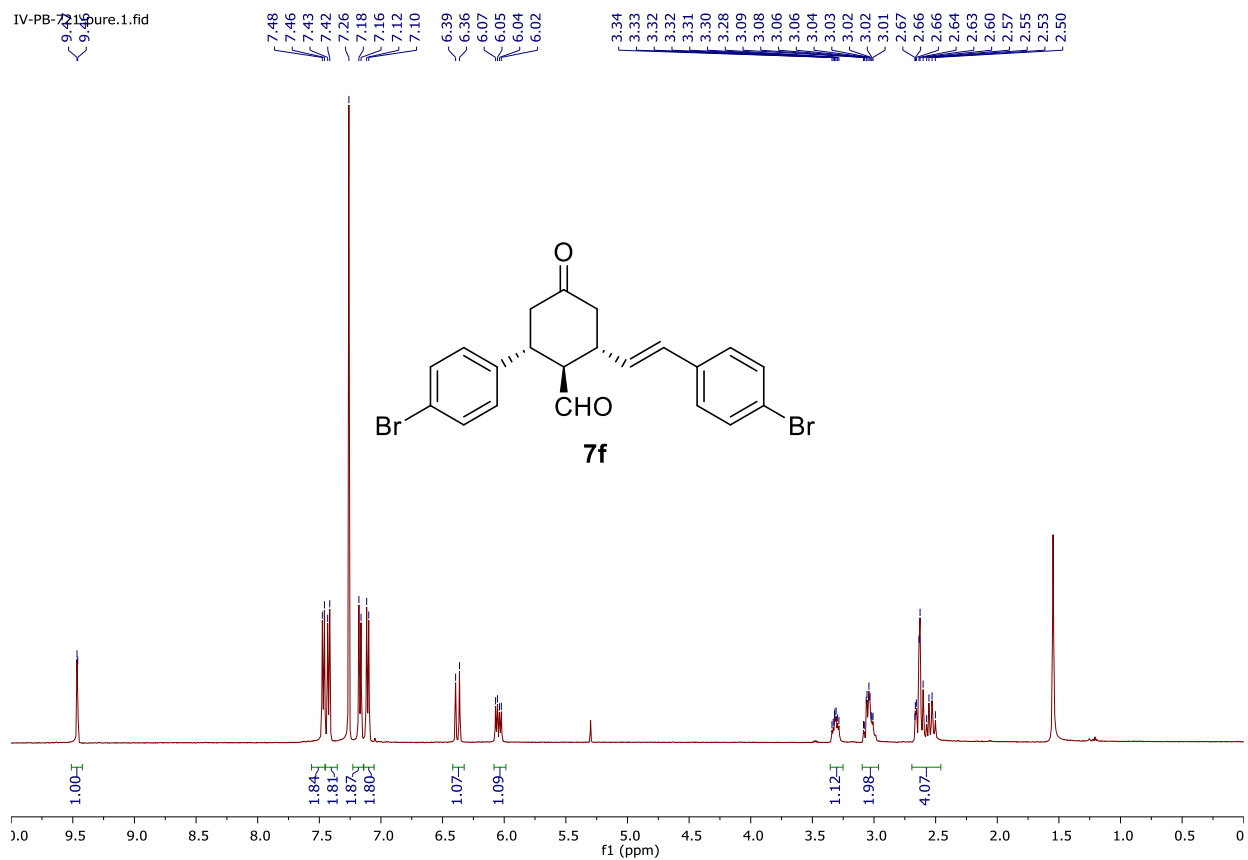

IV-PB-721-1-pure.1.fid

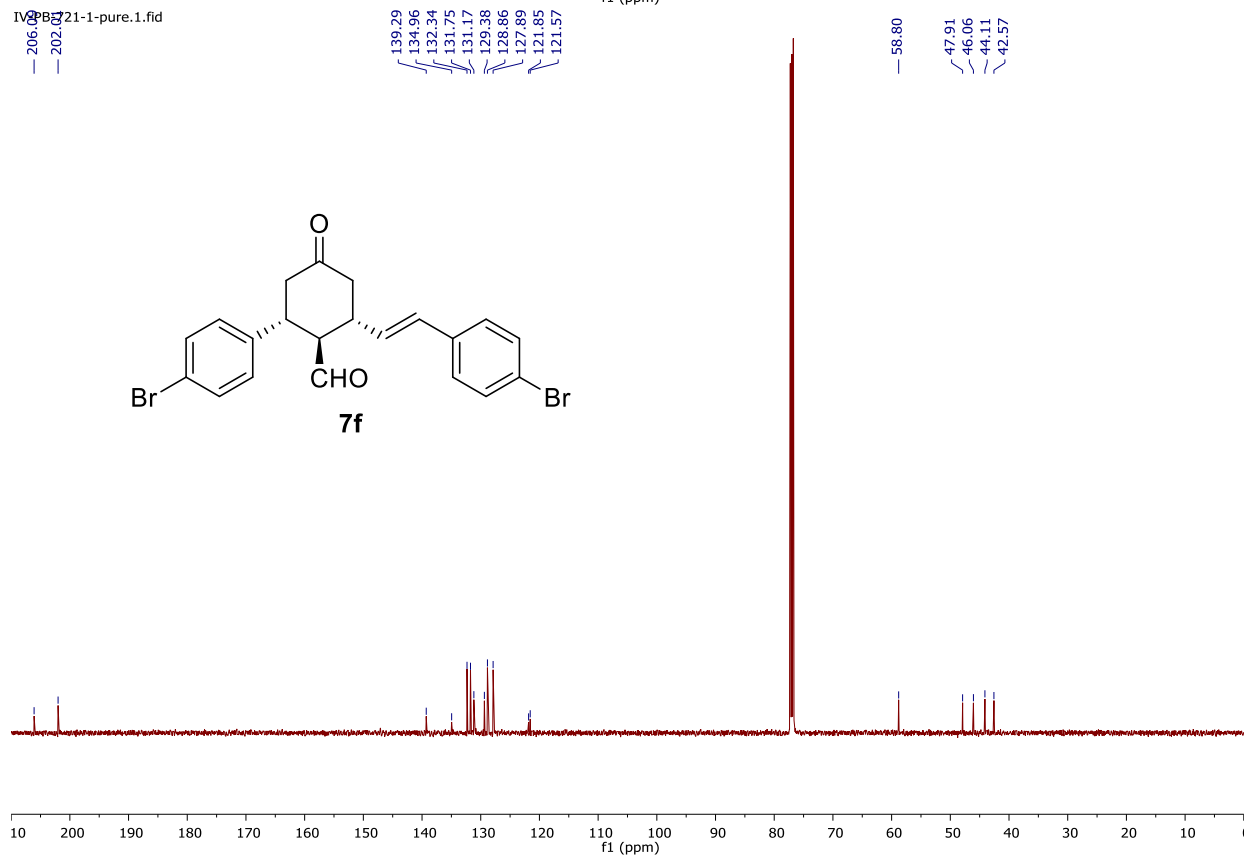

1-rp-1956-pure.1.fid

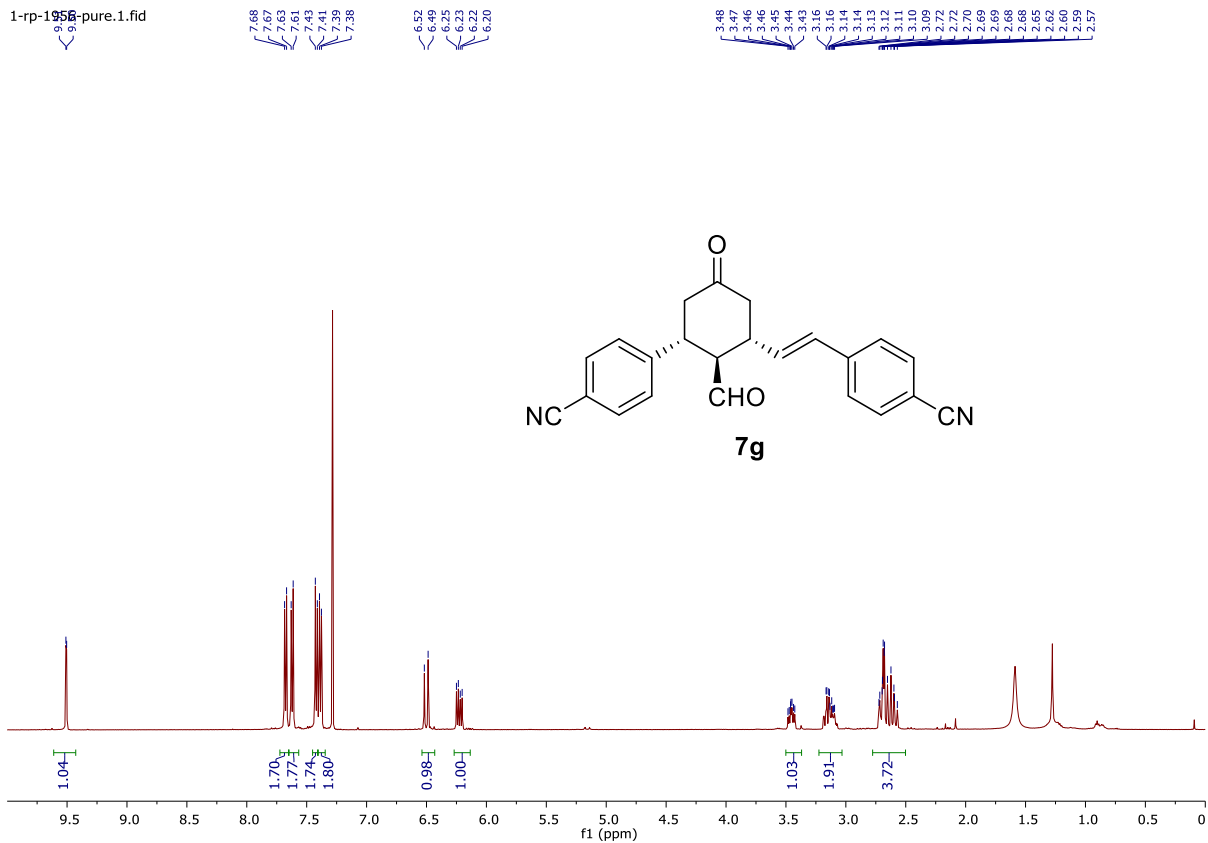

1-rp-1956-pure.2.fid

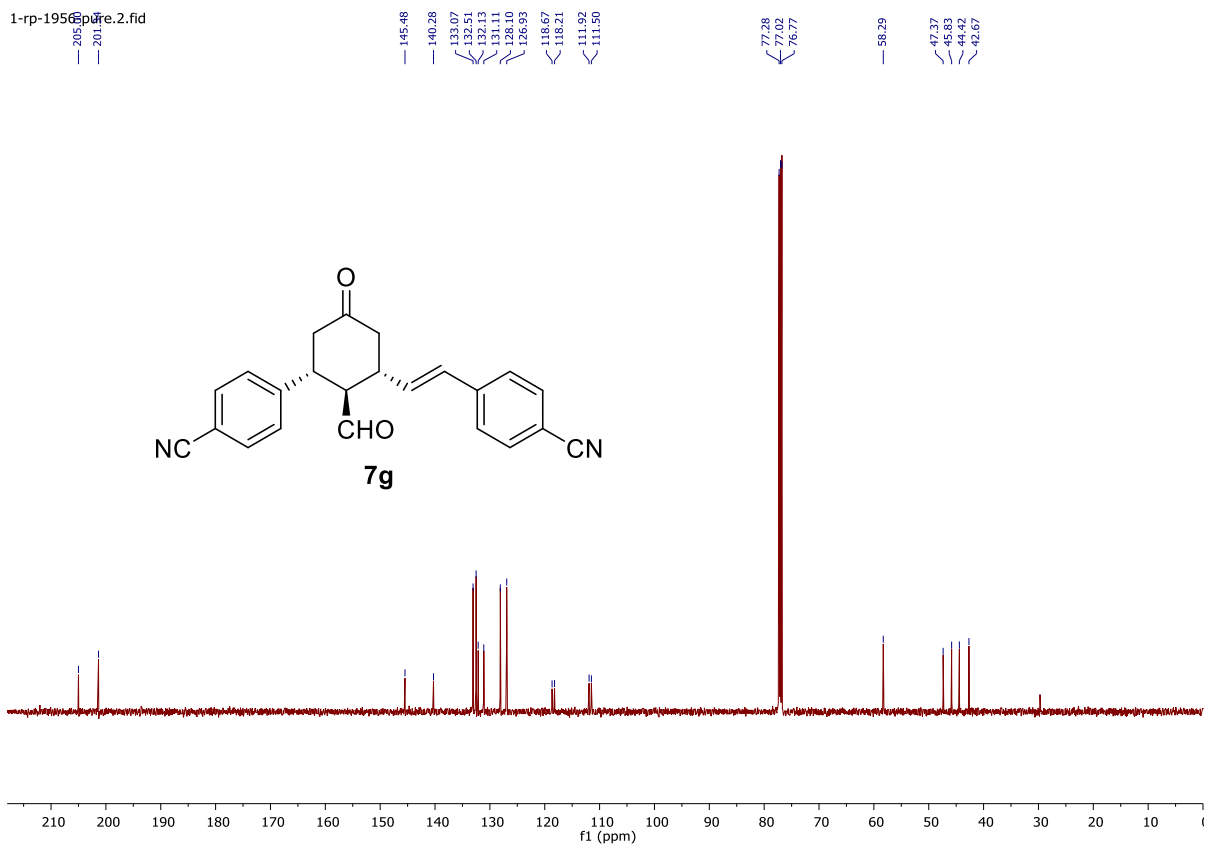

IV-PB-871.1.fid

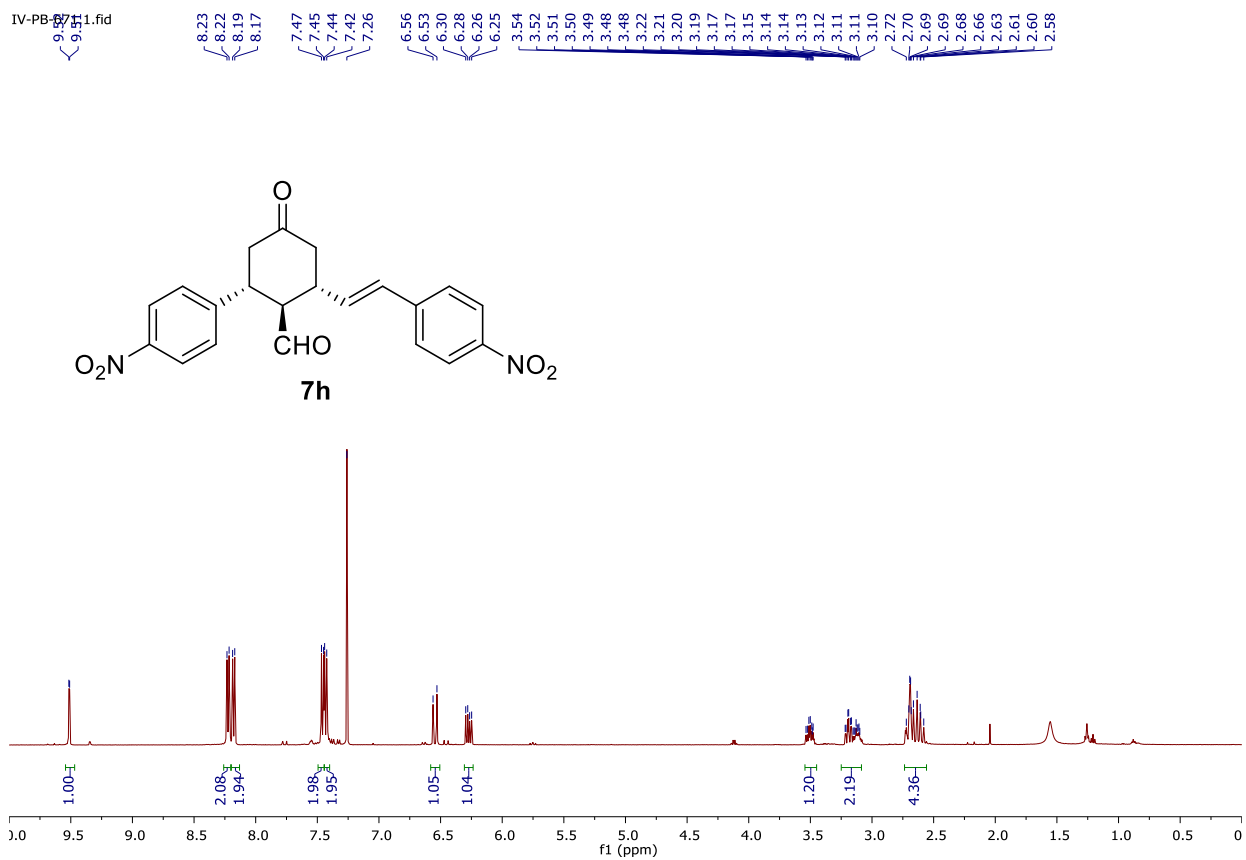

IV-PB-871.2.fid

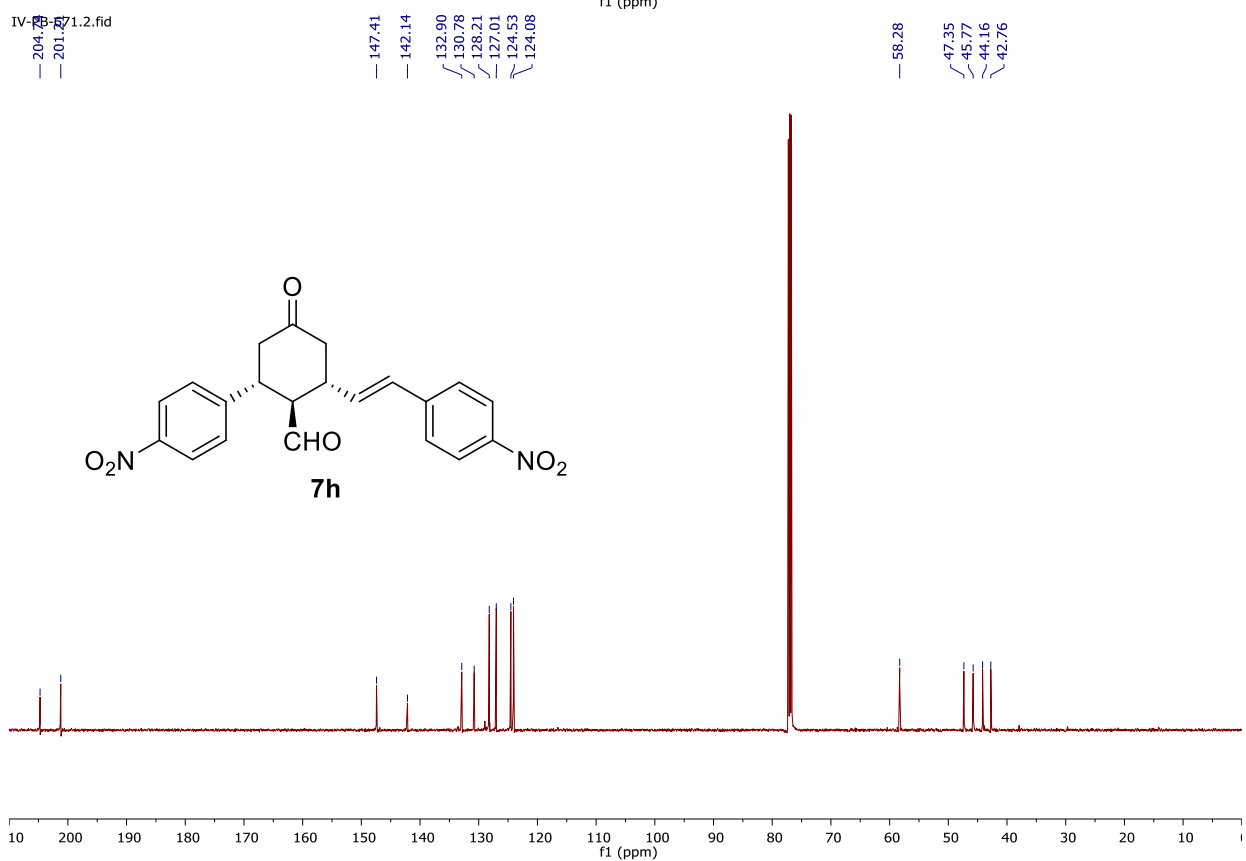

9.47  
9.45  
7.73  
7.71  
7.69  
7.67  
7.65  
7.24  
7.23  
7.22  
7.21  
7.21  
7.20  
7.19  
7.19  
7.18  
7.18  
6.95  
6.94  
6.93  
6.92  
6.91  
6.91  
6.89  
6.88  
6.87  
6.86  
6.85  
6.85  
6.83  
6.83  
6.79  
6.76  
6.10  
6.08  
6.07  
6.05  
3.84  
3.83  
3.82  
3.14  
3.13  
3.11  
3.11  
3.09  
3.09  
2.78  
2.75  
2.66  
2.66  
2.65  
2.63  
2.62  
2.62  
2.59  
2.56  
2.56  
2.54  
2.53

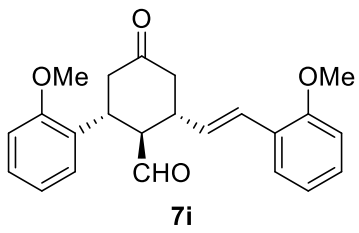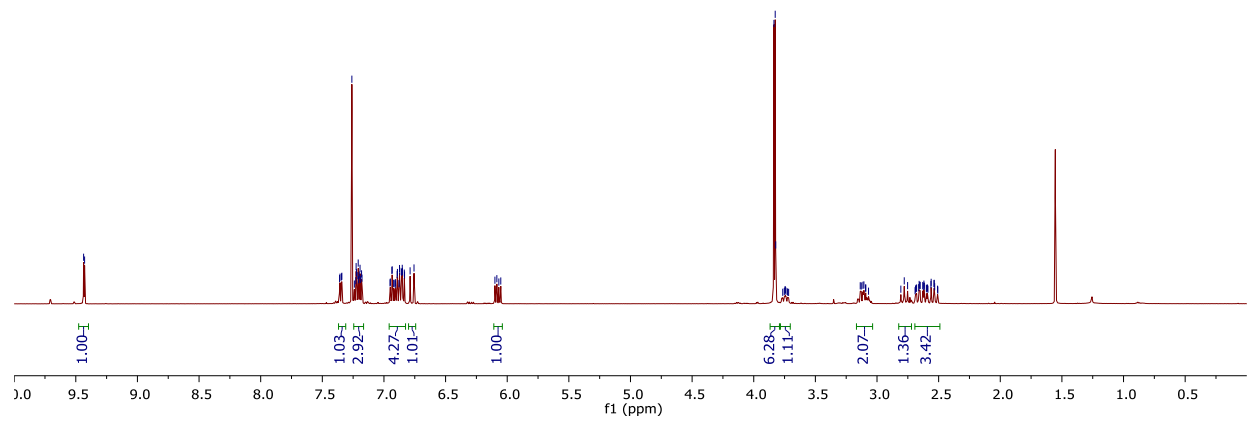

207.583.2.fid  
202.583.2.fid

156.64  
156.61  
129.81  
128.84  
128.55  
128.26  
127.99  
126.73  
126.53  
125.29  
121.02  
120.58  
110.99  
110.84  
77.26  
77.00  
76.75  
58.32  
55.42  
55.29  
46.38  
45.88  
42.71  
38.40

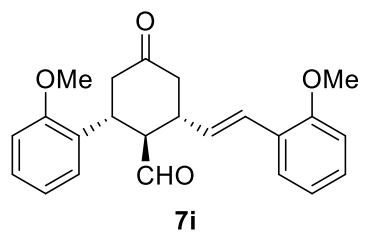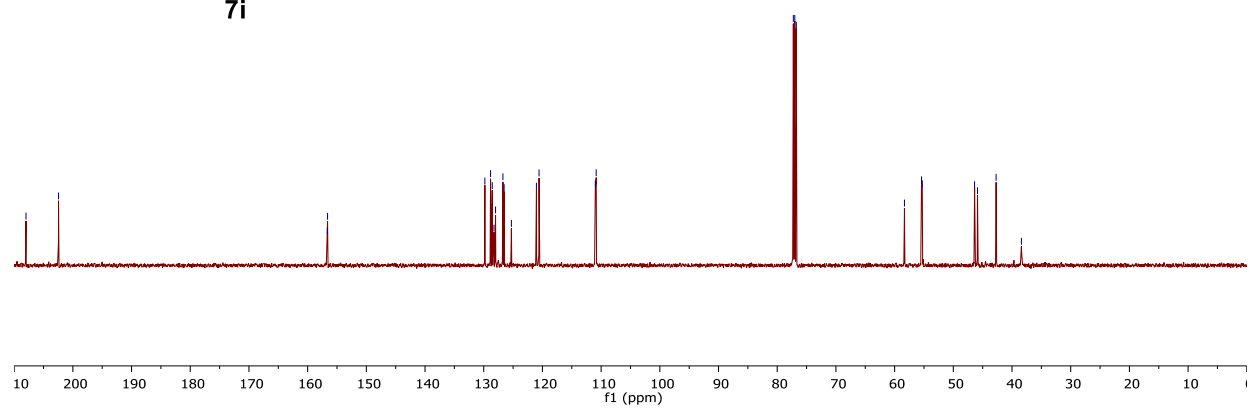

9.48  
9.47  
7.73  
7.72  
7.71  
7.70  
7.21  
7.20  
6.92  
6.92  
6.91  
6.90  
6.85  
6.84  
6.84  
6.83  
6.83  
6.83  
6.81  
6.81  
6.80  
6.80  
6.79  
6.79  
6.78  
6.78  
6.77  
6.76  
6.76  
6.75  
6.42  
6.39  
6.09  
6.07  
6.06  
6.04  
3.82  
3.81  
3.81  
3.80  
3.30  
3.29  
3.28  
3.27  
3.12  
3.12  
3.10  
3.09  
3.08  
3.07  
3.07  
3.04  
3.04  
3.03  
3.02  
2.66  
2.65  
2.65  
2.64  
2.64  
2.63  
2.56  
2.54  
2.53  
2.51

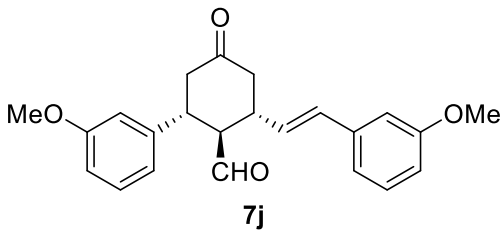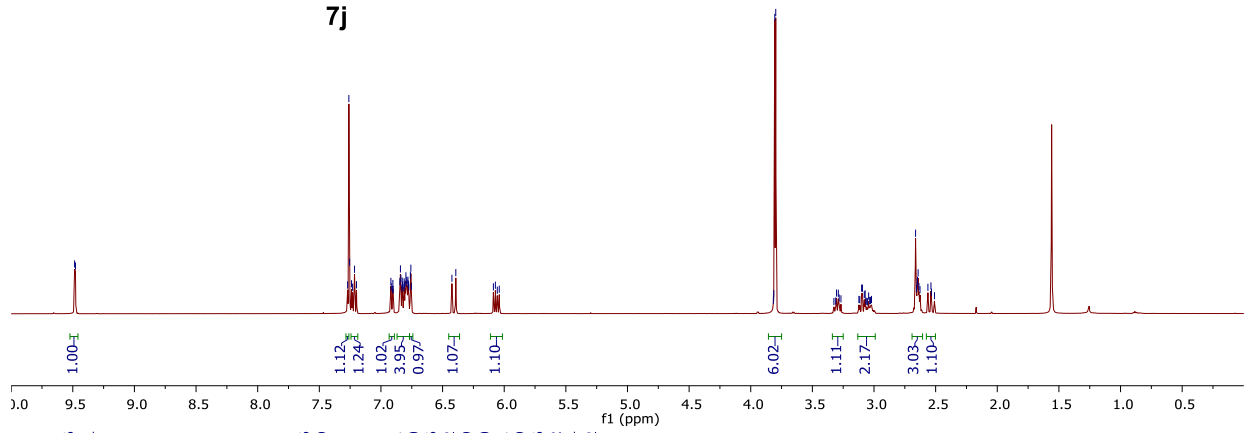

IV-PB-635-2.fid

206.83  
202.71  
160.06  
159.79  
141.91  
137.60  
131.96  
130.22  
129.59  
129.20  
119.31  
118.99  
113.56  
113.32  
112.54  
111.72  
58.91  
55.23  
48.12  
46.21  
44.85  
42.50

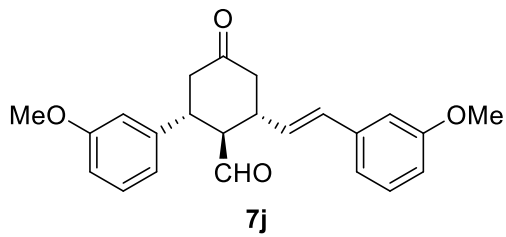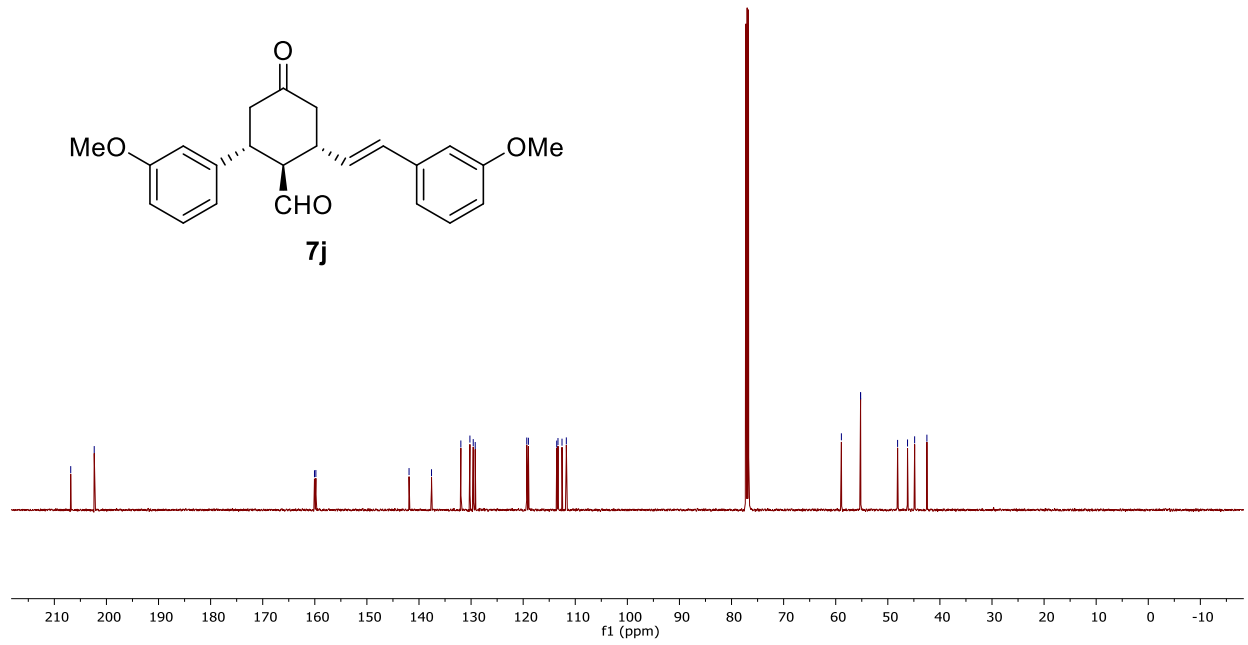

IV-PB-694-1.1.fid

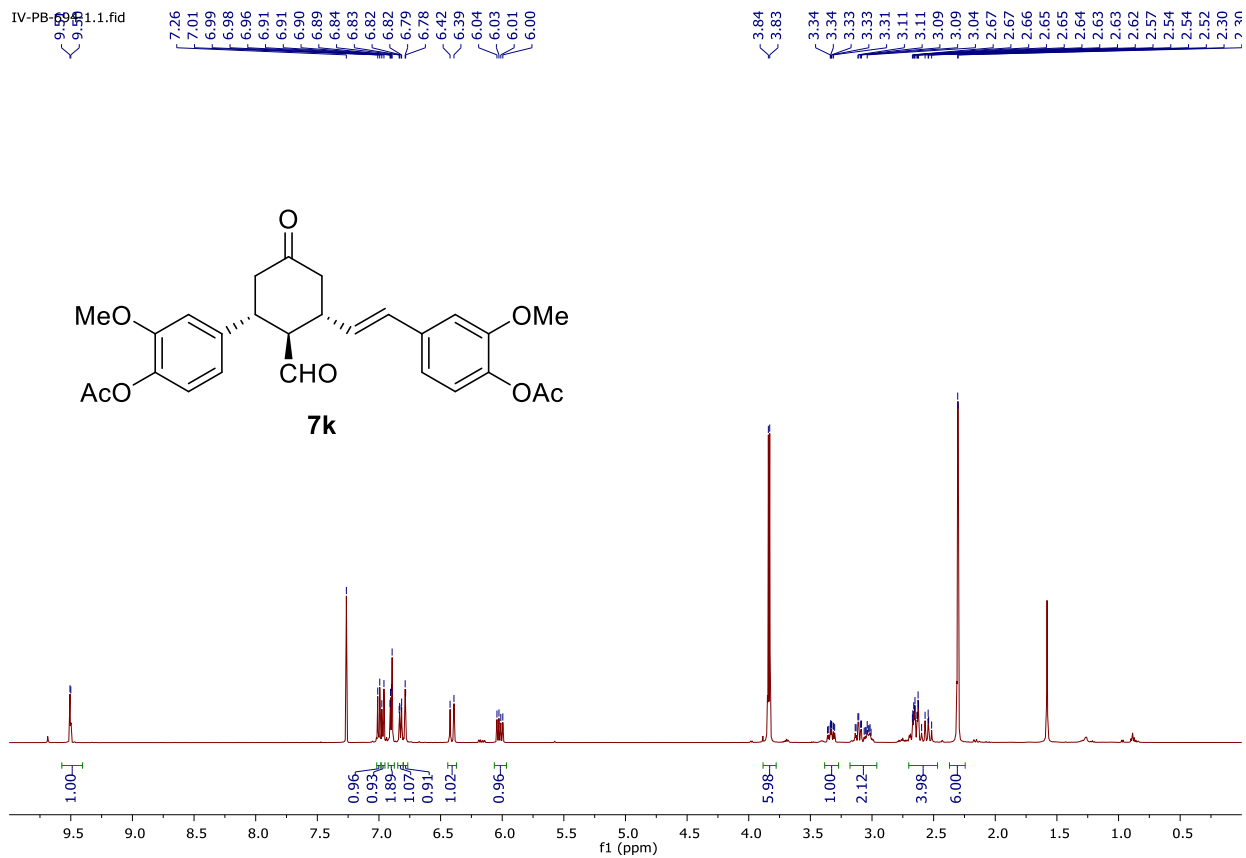

IV-PB-694-1.2.fid

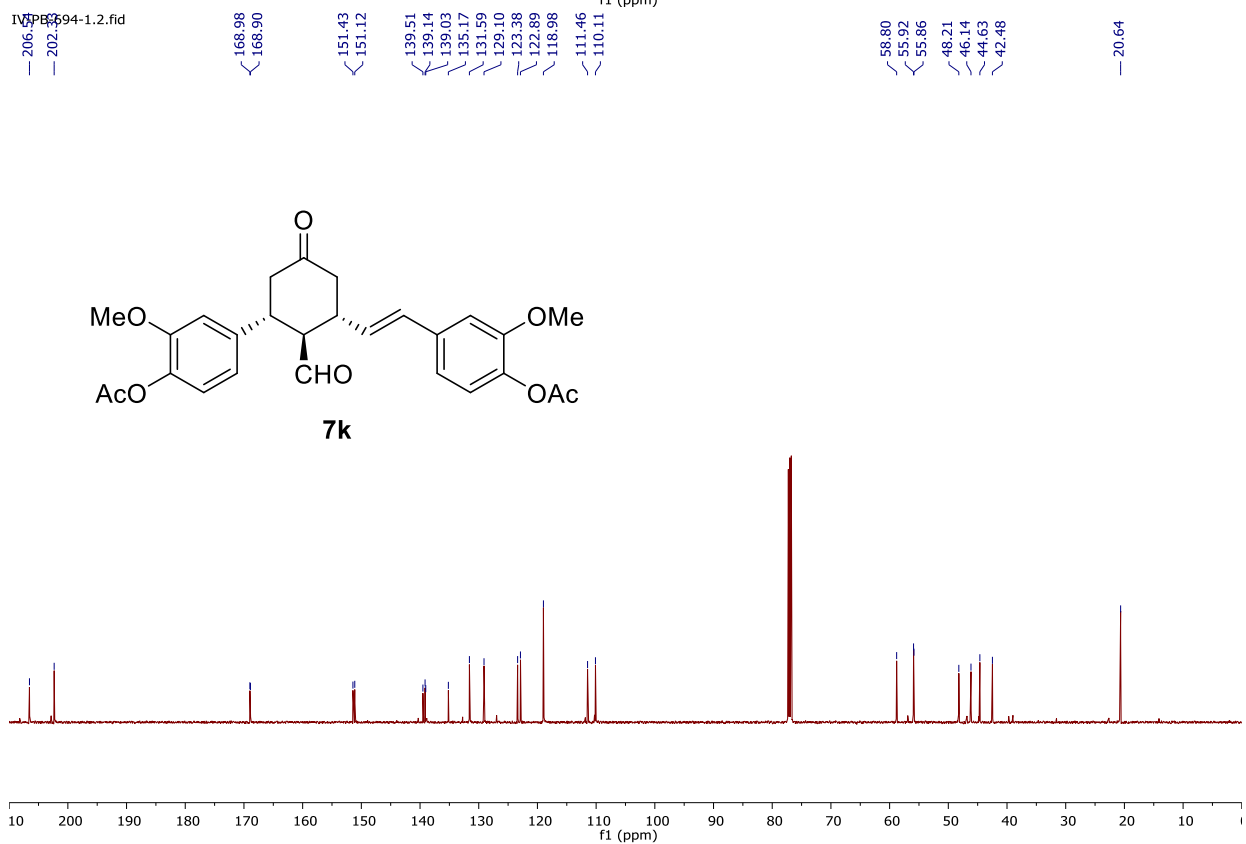



1-NS-1325.216.d  
 9.56, 9.54, 8.50, 8.48, 8.46, 8.44, 8.42, 8.40, 8.38, 8.36, 8.34, 8.32, 8.30, 8.28, 8.26, 8.24, 8.22, 8.20, 8.18, 8.16, 8.14, 8.12, 8.10, 8.08, 8.06, 8.04, 8.02, 8.00, 7.98, 7.96, 7.94, 7.92, 7.90, 7.88, 7.86, 7.84, 7.82, 7.80, 7.78, 7.76, 7.74, 7.72, 7.70, 7.68, 7.66, 7.64, 7.62, 7.60, 7.58, 7.56, 7.54, 7.52, 7.50, 7.48, 7.46, 7.44, 7.42, 7.40, 7.38, 7.36, 7.34, 7.32, 7.30, 7.28, 7.26, 7.24, 7.22, 7.20, 7.18, 7.16, 7.14, 7.12, 7.10, 7.08, 7.06, 7.04, 7.02, 7.00, 6.98, 6.96, 6.94, 6.92, 6.90, 6.88, 6.86, 6.84, 6.82, 6.80, 6.78, 6.76, 6.74, 6.72, 6.70, 6.68, 6.66, 6.64, 6.62, 6.60, 6.58, 6.56, 6.54, 6.52, 6.50, 6.48, 6.46, 6.44, 6.42, 6.40, 6.38, 6.36, 6.34, 6.32, 6.30, 6.28, 6.26, 6.24, 6.22, 6.20, 6.18, 6.16, 6.14, 6.12, 6.10, 6.08, 6.06, 6.04, 6.02, 6.00, 5.98, 5.96, 5.94, 5.92, 5.90, 5.88, 5.86, 5.84, 5.82, 5.80, 5.78, 5.76, 5.74, 5.72, 5.70, 5.68, 5.66, 5.64, 5.62, 5.60, 5.58, 5.56, 5.54, 5.52, 5.50, 5.48, 5.46, 5.44, 5.42, 5.40, 5.38, 5.36, 5.34, 5.32, 5.30, 5.28, 5.26, 5.24, 5.22, 5.20, 5.18, 5.16, 5.14, 5.12, 5.10, 5.08, 5.06, 5.04, 5.02, 5.00, 4.98, 4.96, 4.94, 4.92, 4.90, 4.88, 4.86, 4.84, 4.82, 4.80, 4.78, 4.76, 4.74, 4.72, 4.70, 4.68, 4.66, 4.64, 4.62, 4.60, 4.58, 4.56, 4.54, 4.52, 4.50, 4.48, 4.46, 4.44, 4.42, 4.40, 4.38, 4.36, 4.34, 4.32, 4.30, 4.28, 4.26, 4.24, 4.22, 4.20, 4.18, 4.16, 4.14, 4.12, 4.10, 4.08, 4.06, 4.04, 4.02, 4.00, 3.98, 3.96, 3.94, 3.92, 3.90, 3.88, 3.86, 3.84, 3.82, 3.80, 3.78, 3.76, 3.74, 3.72, 3.70, 3.68, 3.66, 3.64, 3.62, 3.60, 3.58, 3.56, 3.54, 3.52, 3.50, 3.48, 3.46, 3.44, 3.42, 3.40, 3.38, 3.36, 3.34, 3.32, 3.30, 3.28, 3.26, 3.24, 3.22, 3.20, 3.18, 3.16, 3.14, 3.12, 3.10, 3.08, 3.06, 3.04, 3.02, 3.00, 2.98, 2.96, 2.94, 2.92, 2.90, 2.88, 2.86, 2.84, 2.82, 2.80, 2.78, 2.76, 2.74, 2.72, 2.70, 2.68, 2.66, 2.64, 2.62, 2.60, 2.58, 2.56, 2.54, 2.52, 2.50, 2.48, 2.46, 2.44, 2.42, 2.40, 2.38, 2.36, 2.34, 2.32, 2.30, 2.28, 2.26, 2.24, 2.22, 2.20, 2.18, 2.16, 2.14, 2.12, 2.10, 2.08, 2.06, 2.04, 2.02, 2.00, 1.98, 1.96, 1.94, 1.92, 1.90, 1.88, 1.86, 1.84, 1.82, 1.80, 1.78, 1.76, 1.74, 1.72, 1.70, 1.68, 1.66, 1.64, 1.62, 1.60, 1.58, 1.56, 1.54, 1.52, 1.50, 1.48, 1.46, 1.44, 1.42, 1.40, 1.38, 1.36, 1.34, 1.32, 1.30, 1.28, 1.26, 1.24, 1.22, 1.20, 1.18, 1.16, 1.14, 1.12, 1.10, 1.08, 1.06, 1.04, 1.02, 1.00, 0.98, 0.96, 0.94, 0.92, 0.90, 0.88, 0.86, 0.84, 0.82, 0.80, 0.78, 0.76, 0.74, 0.72, 0.70, 0.68, 0.66, 0.64, 0.62, 0.60, 0.58, 0.56, 0.54, 0.52, 0.50, 0.48, 0.46, 0.44, 0.42, 0.40, 0.38, 0.36, 0.34, 0.32, 0.30, 0.28, 0.26, 0.24, 0.22, 0.20, 0.18, 0.16, 0.14, 0.12, 0.10, 0.08, 0.06, 0.04, 0.02, 0.00

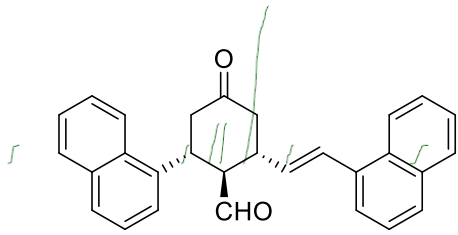

71

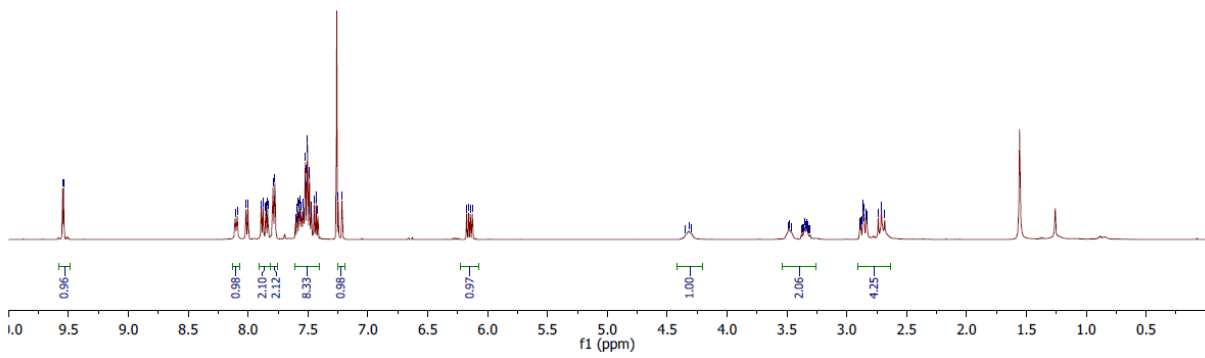

1-NS-1325.216.d

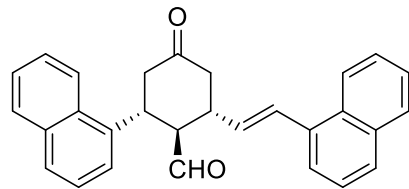

71

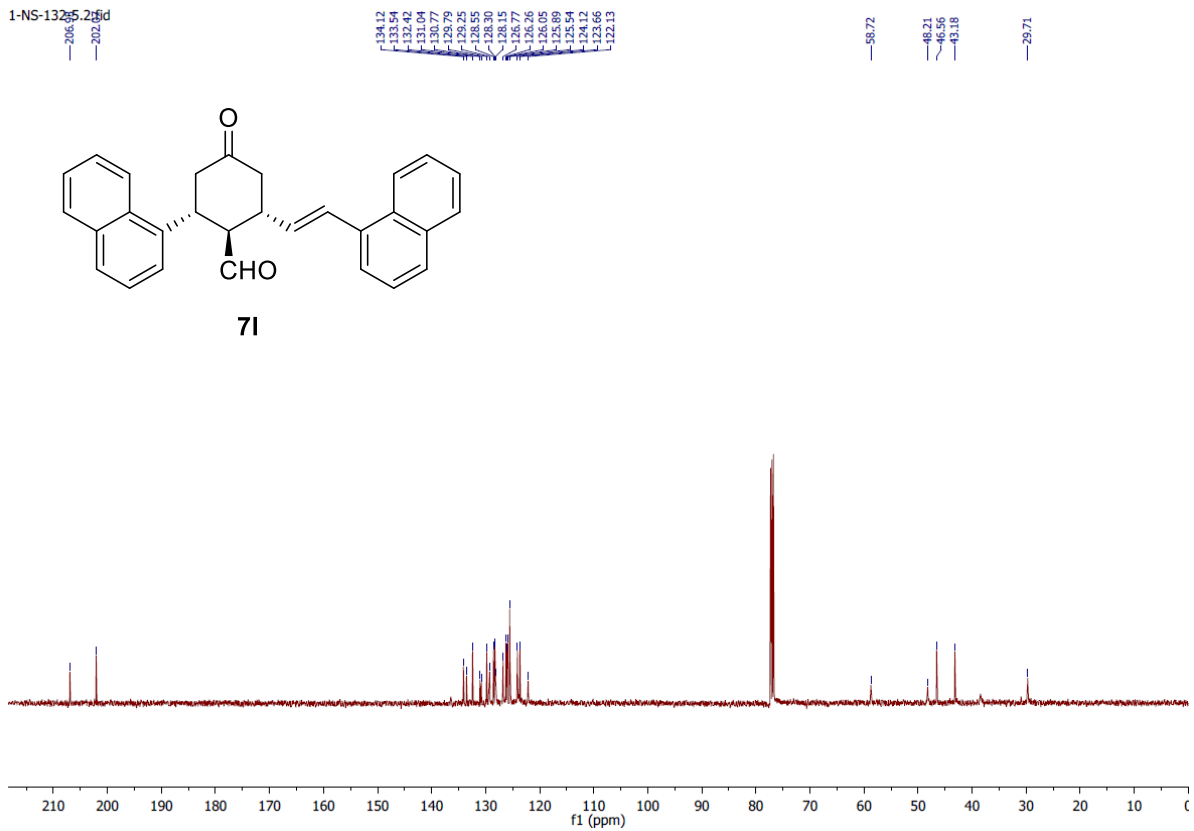

1-rp-1988-pure.1.fid

9.638  
9.618

7.28  
7.24  
7.23  
7.18  
7.17  
6.97  
6.96  
6.95  
6.94  
6.89  
6.88  
6.60  
6.56  
5.93  
5.91  
5.90  
5.88

3.74  
3.73  
3.72  
3.71  
3.71  
3.70  
3.69  
3.68  
3.08  
3.06  
3.06  
3.00  
2.80  
2.79  
2.78  
2.72  
2.69  
2.66  
2.65  
2.63  
2.63  
2.62  
2.62  
2.56  
2.53

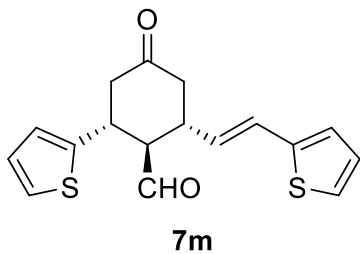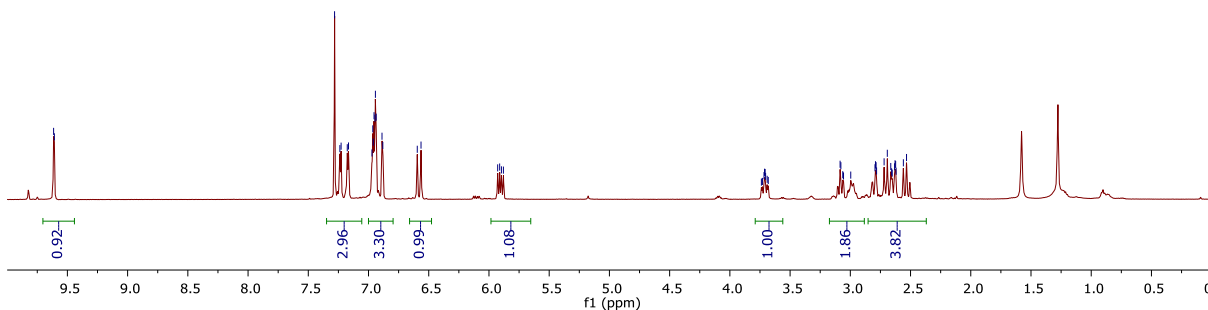

1-rp-1988-pure.2.fid

205.68  
202.7

144.09  
141.04  
128.01  
127.42  
127.11  
126.25  
125.49  
124.85  
124.62  
124.54

77.27  
77.02  
76.76

59.98  
49.10  
46.06  
42.36  
39.75

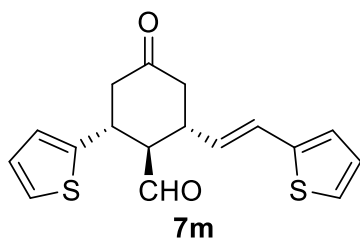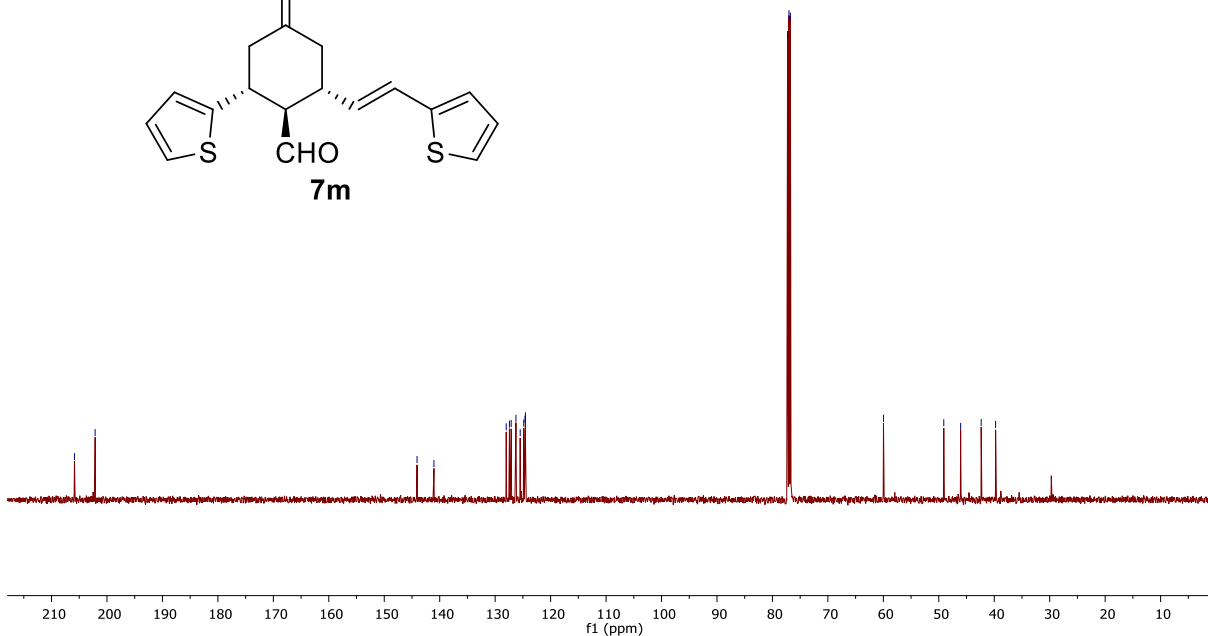

IV-PB-705-1.fid

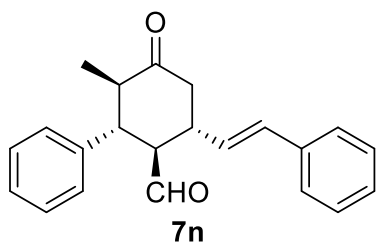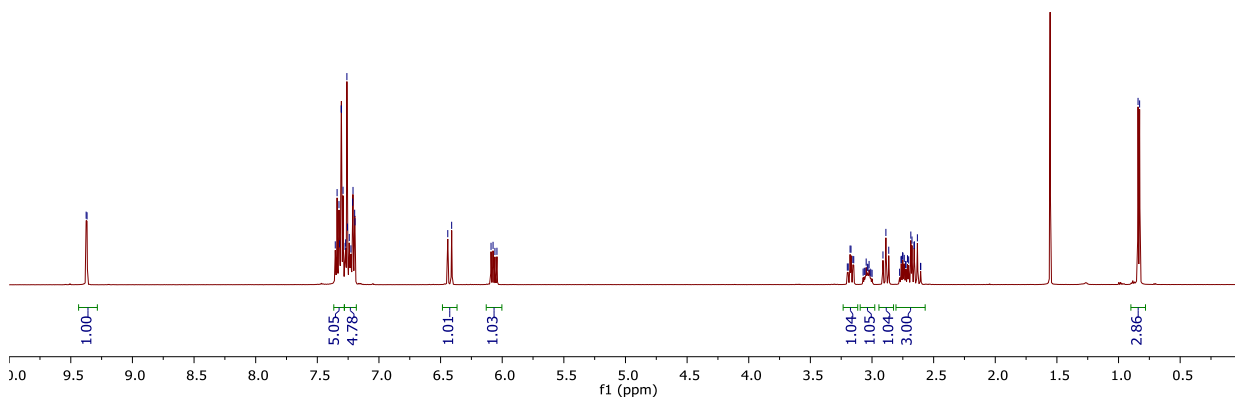

IV-PB-705-2.fid

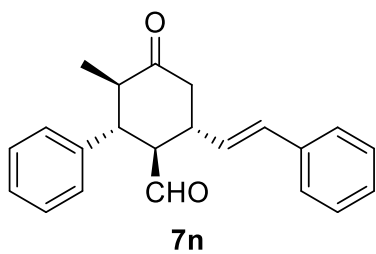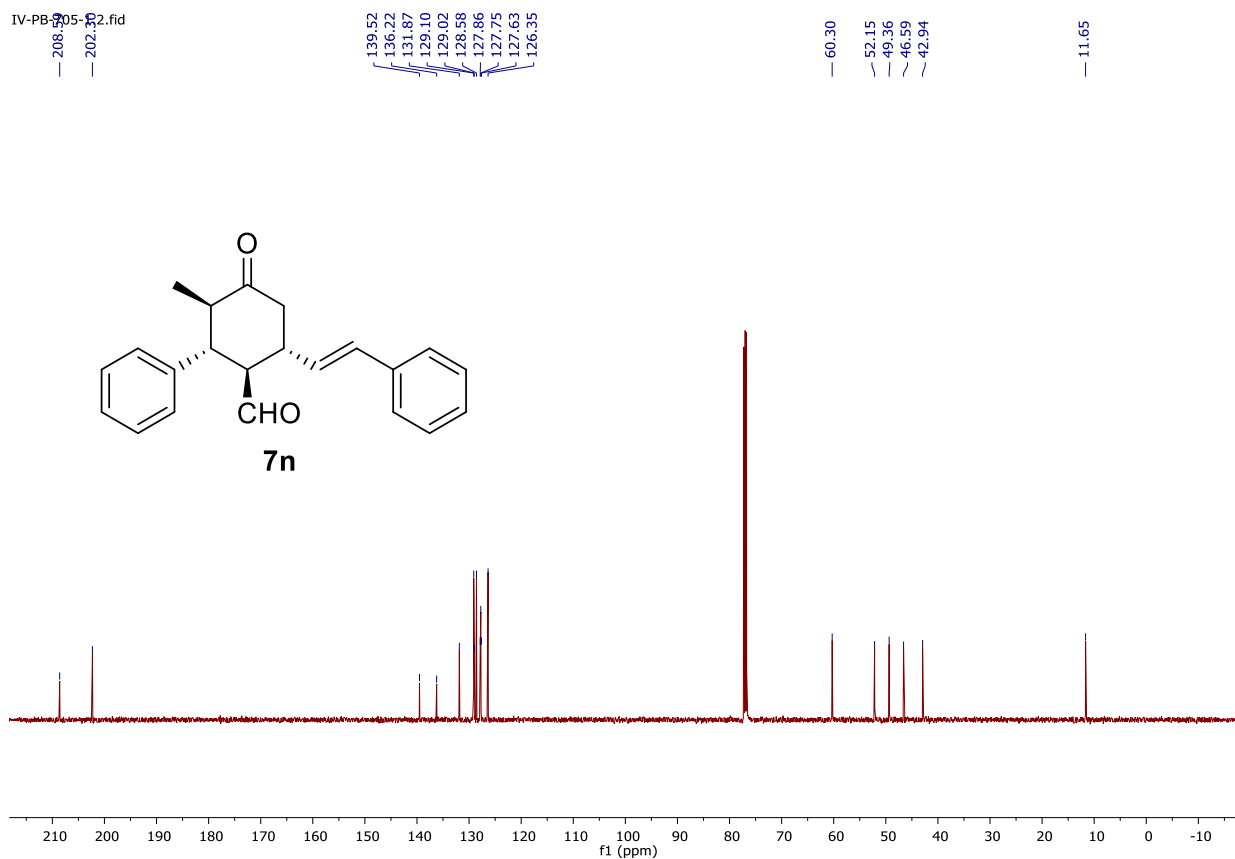

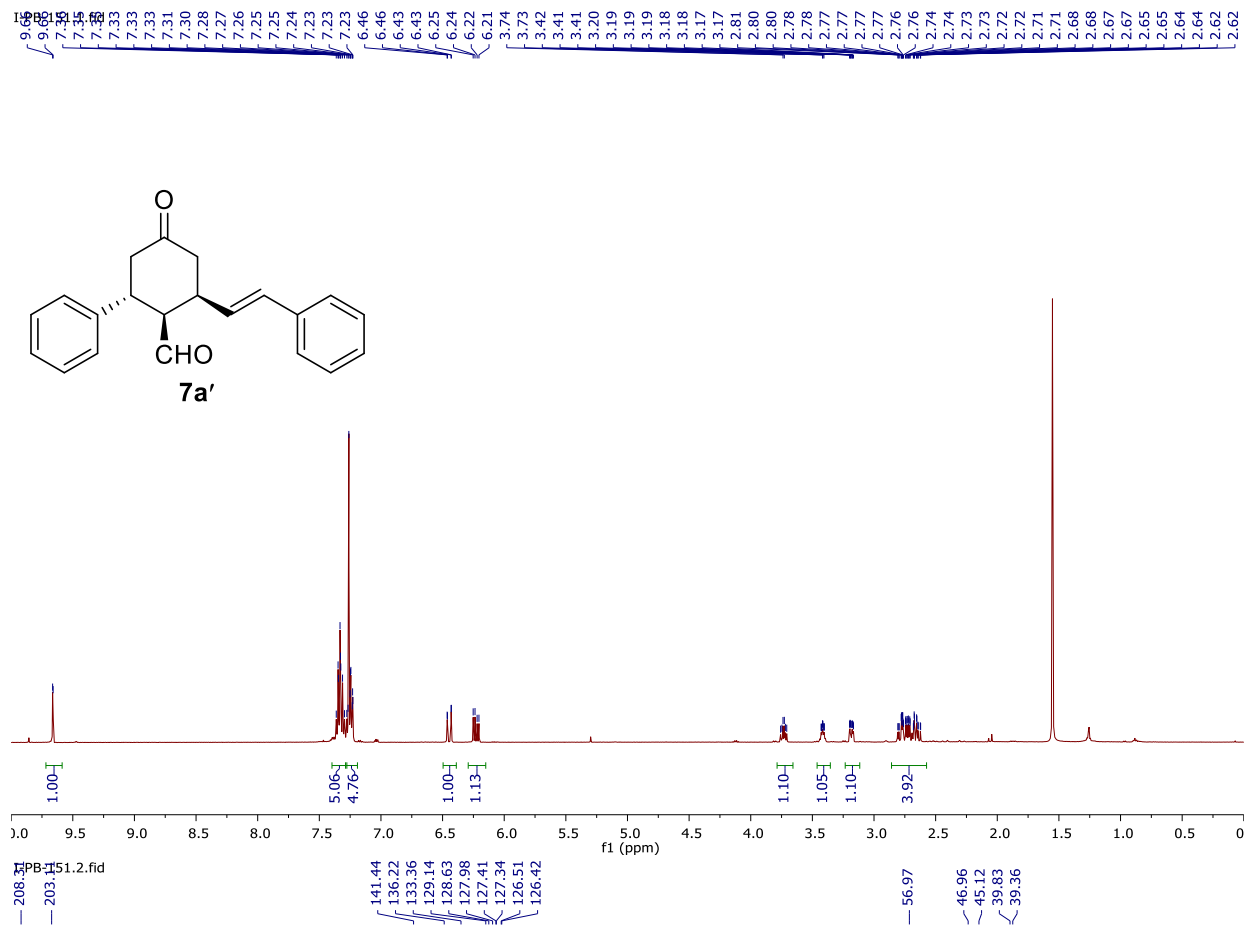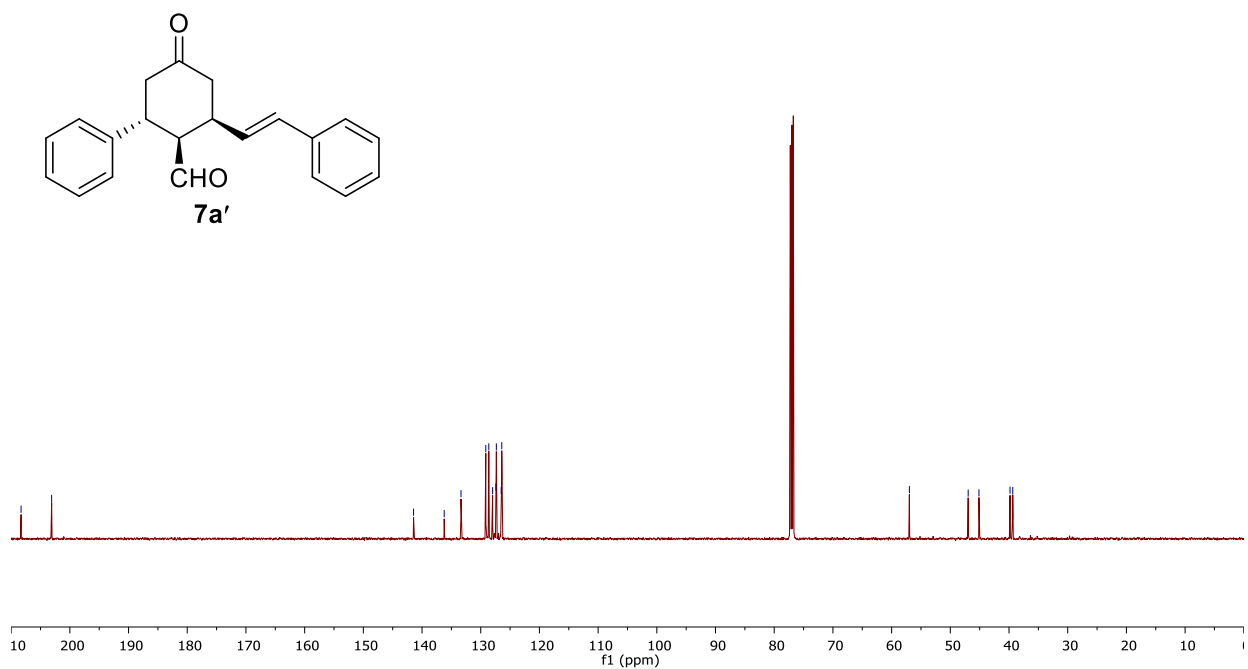

1-rp-1898-pure-me.1.fid

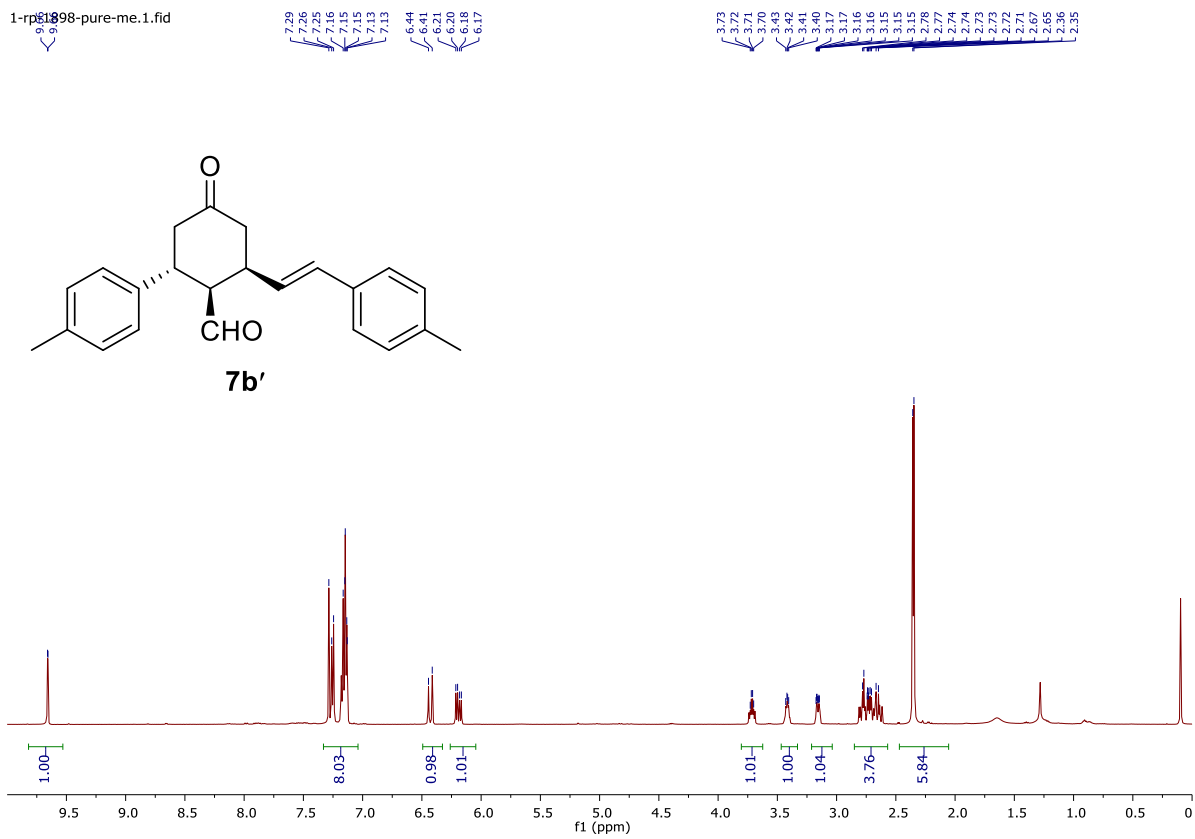

1-rp-1898-pure-me.2.fid

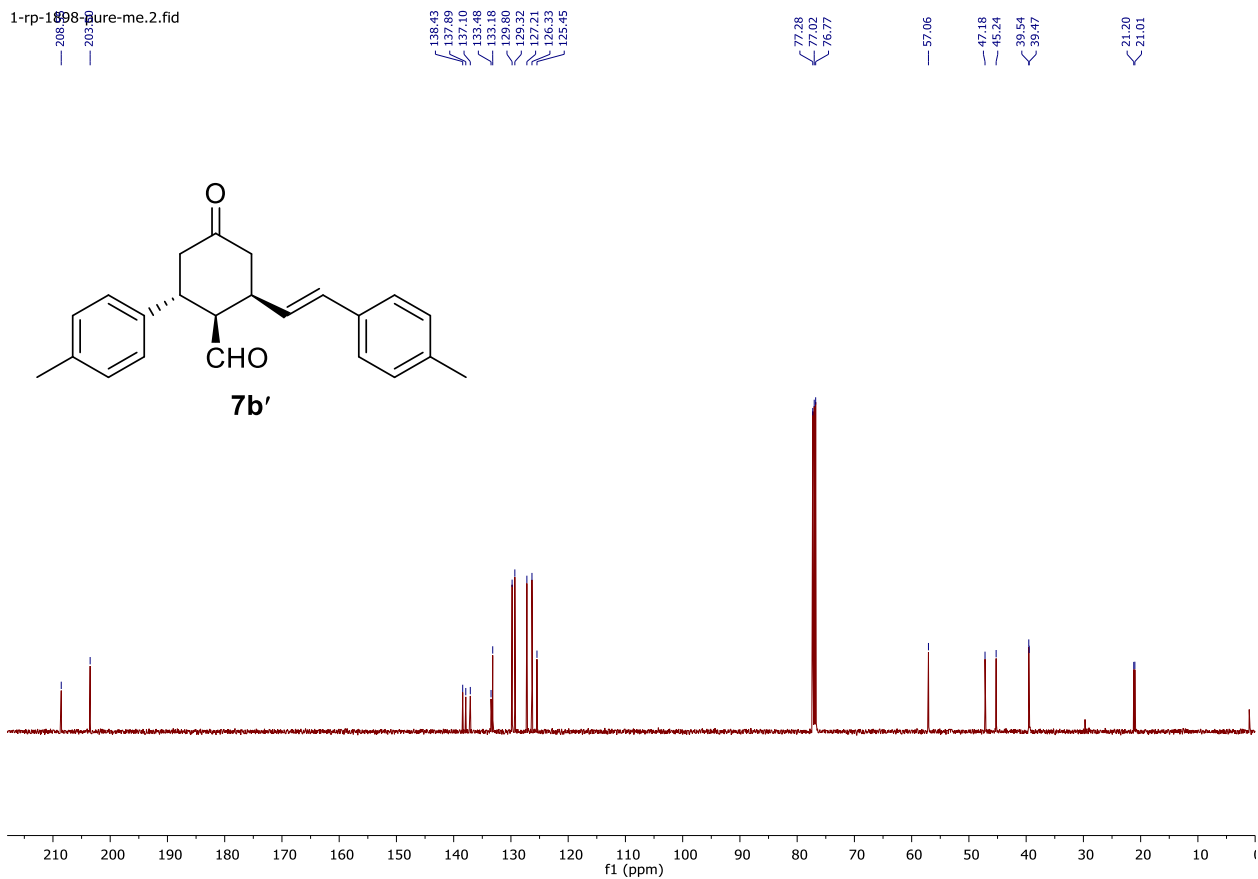

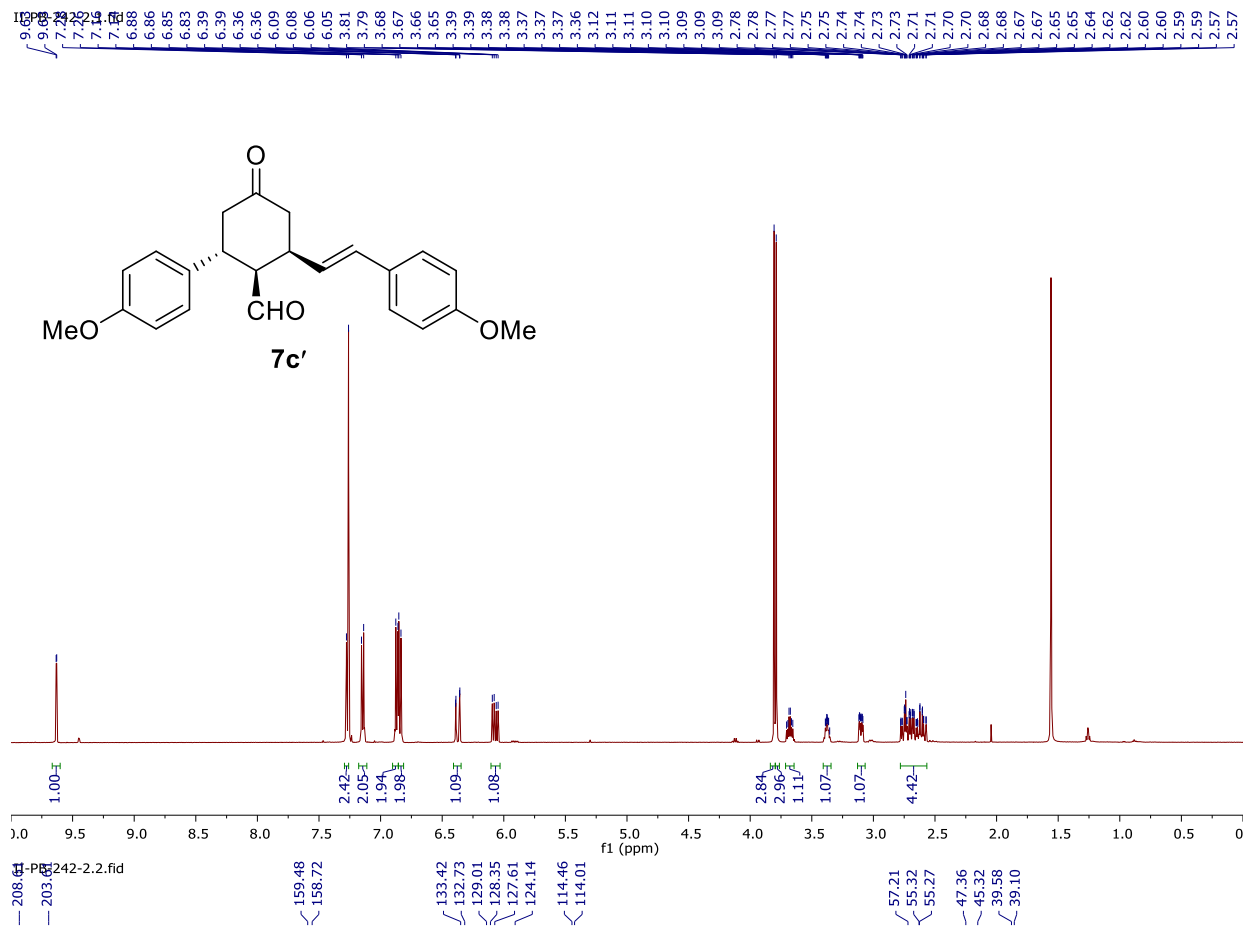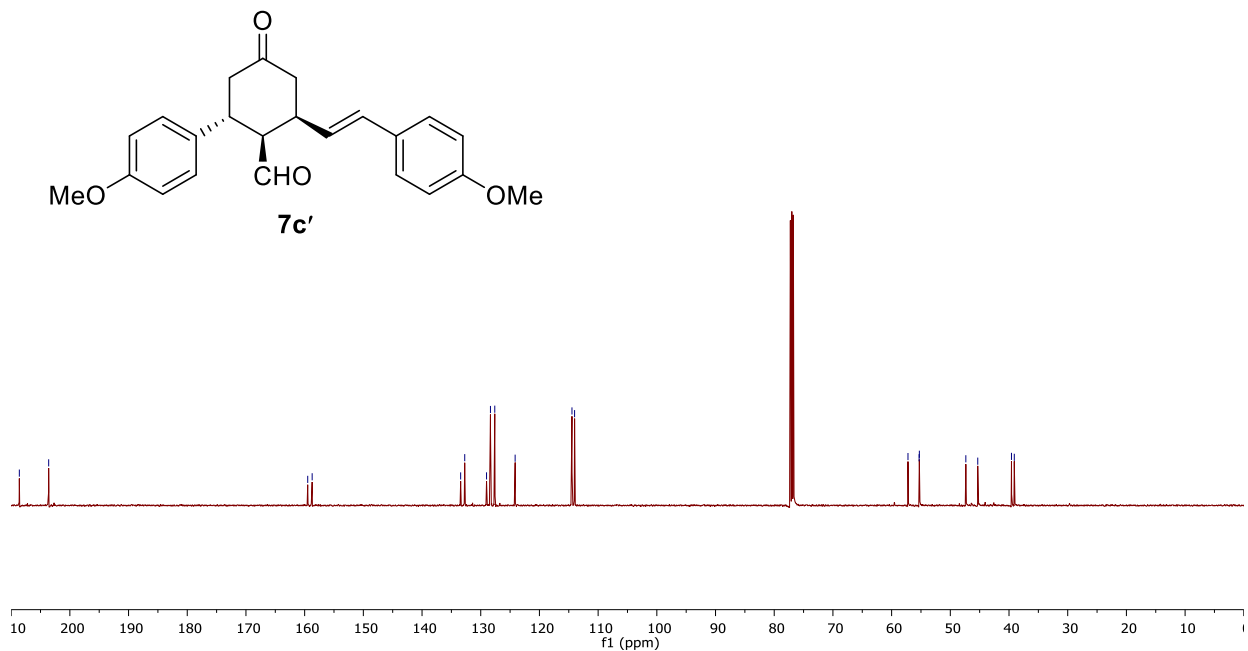

pb-202-1.fid

9.639  
9.108

7.31  
7.30  
7.29  
7.29  
7.28  
7.26  
7.22  
7.21  
7.21  
7.20  
7.19  
7.19  
7.05  
7.04  
7.02  
7.02  
7.00  
6.99  
6.98  
6.42  
6.39  
6.14  
6.12  
6.10  
6.09

3.73  
3.72  
3.71  
3.70  
3.69  
3.68  
3.41  
3.40  
3.40  
3.39  
3.17  
3.17  
3.16  
3.15  
3.15  
3.15  
3.14  
2.80  
2.79  
2.77  
2.76  
2.75  
2.75  
2.74  
2.74  
2.73  
2.72  
2.71  
2.71  
2.70  
2.70  
2.68  
2.67  
2.63  
2.61  
2.60  
2.58

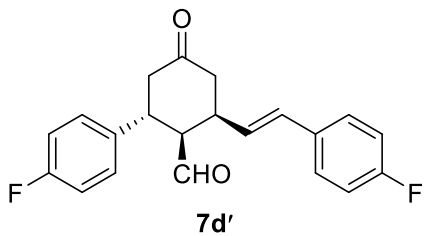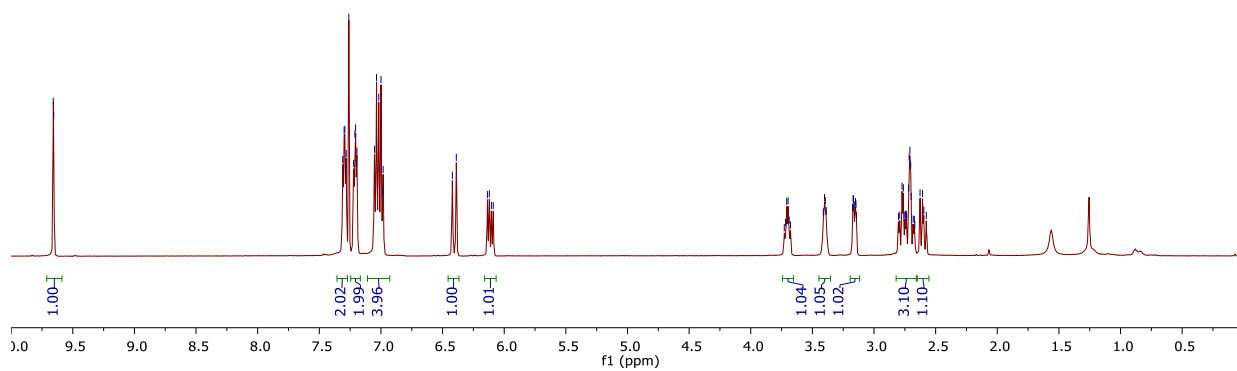

pb-202-2.fid

206.74  
202.54

163.33  
162.83  
161.36  
160.87

135.89  
135.87  
132.03  
132.01  
130.97  
128.69  
128.63  
128.19  
127.90  
127.84  
116.16  
115.99  
115.61  
115.43

59.09

48.17  
46.19  
43.83  
42.61

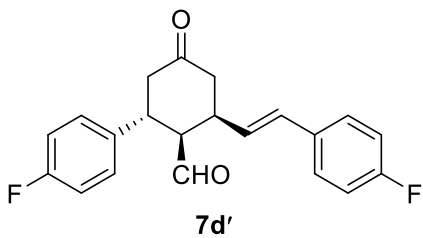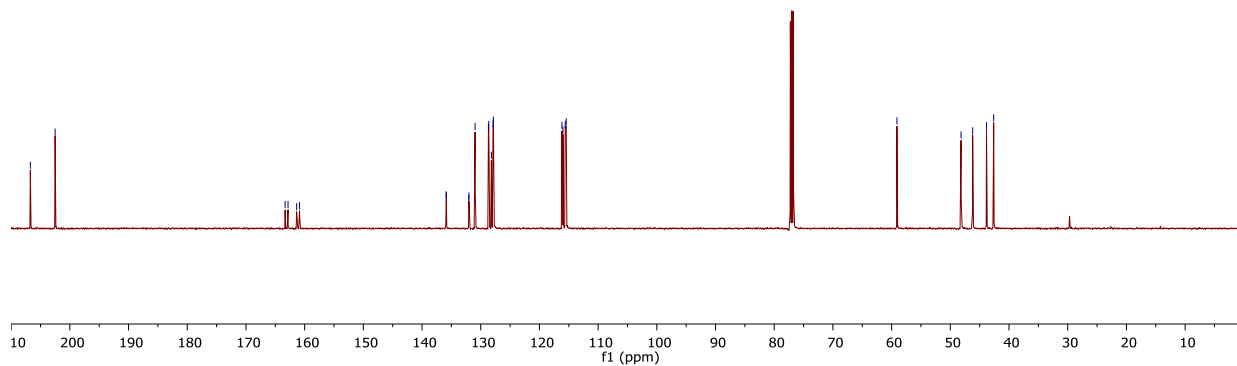

1-rp-1899-pure-cl.1.fid

9.66  
9.66  
7.33  
7.33  
7.31  
7.30  
7.29  
7.28  
7.27  
7.26  
7.21  
7.19  
6.43  
6.40  
6.21  
6.20  
6.18  
6.17  
3.74  
3.72  
3.72  
3.71  
3.70  
3.69  
3.43  
3.43  
3.42  
3.42  
3.41  
3.41  
3.21  
3.21  
3.20  
3.19  
3.19  
3.18  
3.18  
2.82  
2.81  
2.79  
2.78  
2.77  
2.76  
2.76  
2.75  
2.74  
2.74  
2.73  
2.73  
2.72  
2.71  
2.65  
2.63  
2.62  
0.00

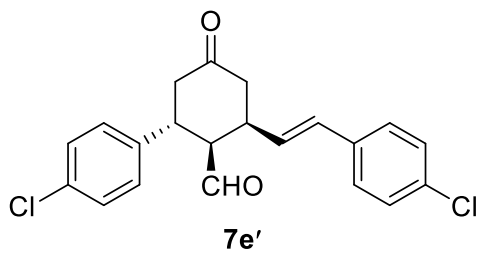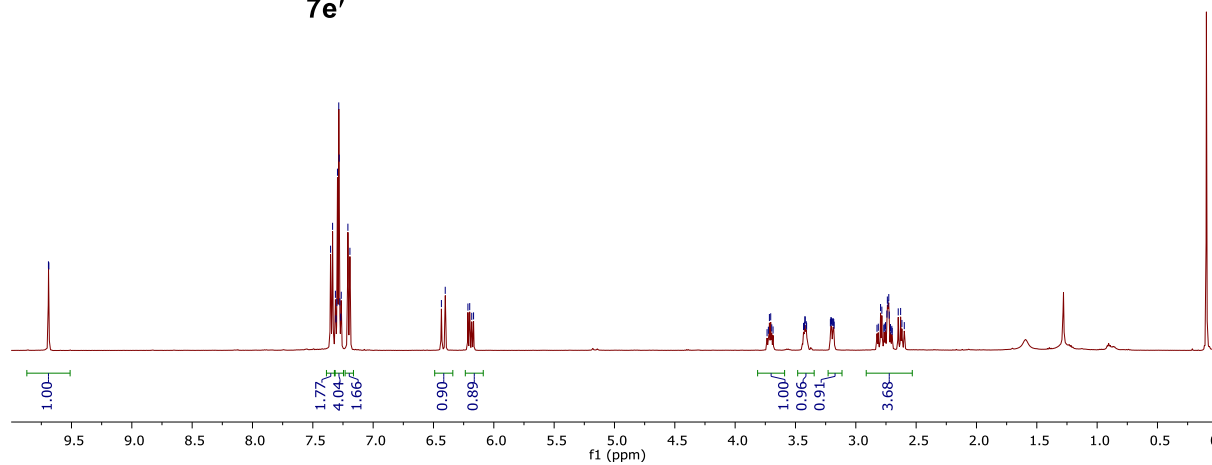

1-rp-1899-pure-cl.2.fid

207.2  
202.2  
139.94  
134.59  
133.76  
133.27  
133.27  
129.31  
128.82  
128.82  
127.64  
126.97  
77.27  
77.02  
76.76  
56.96  
46.75  
44.97  
39.27  
39.05

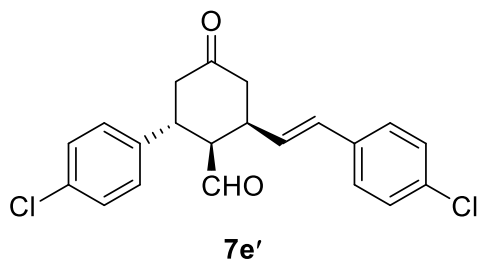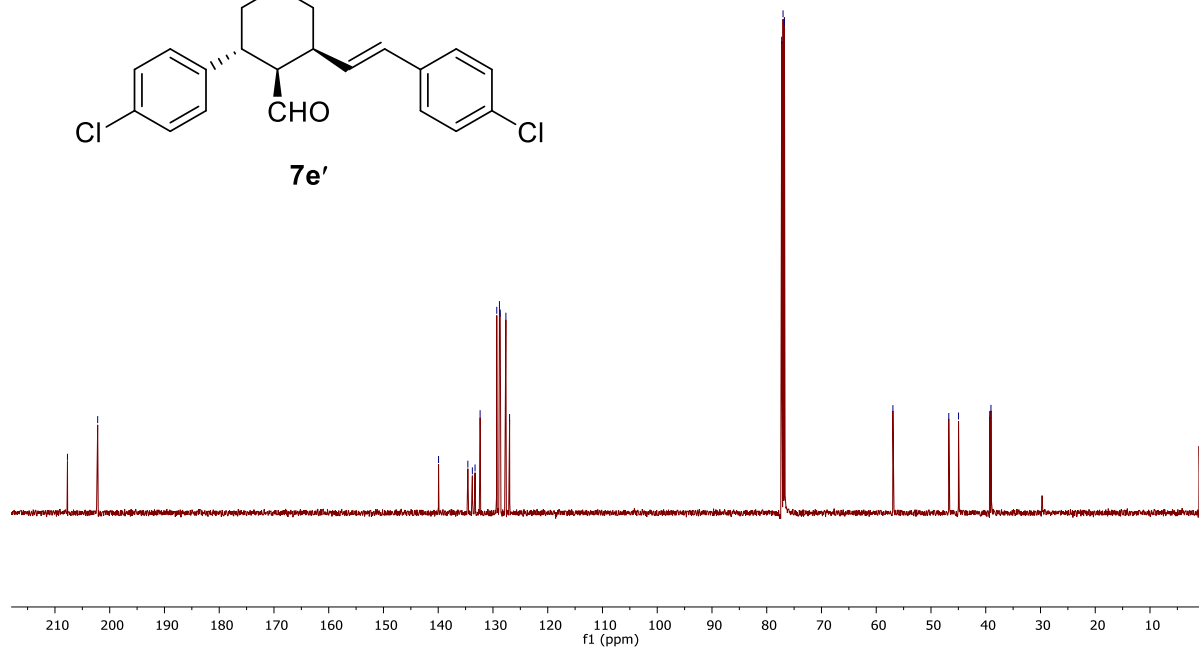



1-rp-198-01-pure-br.1.fid  
9.681  
9.680

7.51  
7.49  
7.47  
7.45  
7.22  
7.20  
7.15  
7.14  
6.42  
6.39  
6.23  
6.21  
6.20  
6.18

3.70  
3.69  
3.43  
3.42  
3.41  
3.40  
3.40  
3.21  
3.21  
3.20  
3.20  
3.19  
3.19  
3.18  
3.18  
2.79  
2.78  
2.74  
2.74  
2.73  
2.73  
2.72  
2.72  
2.65  
2.63  
2.62

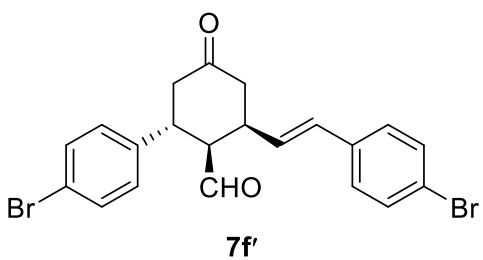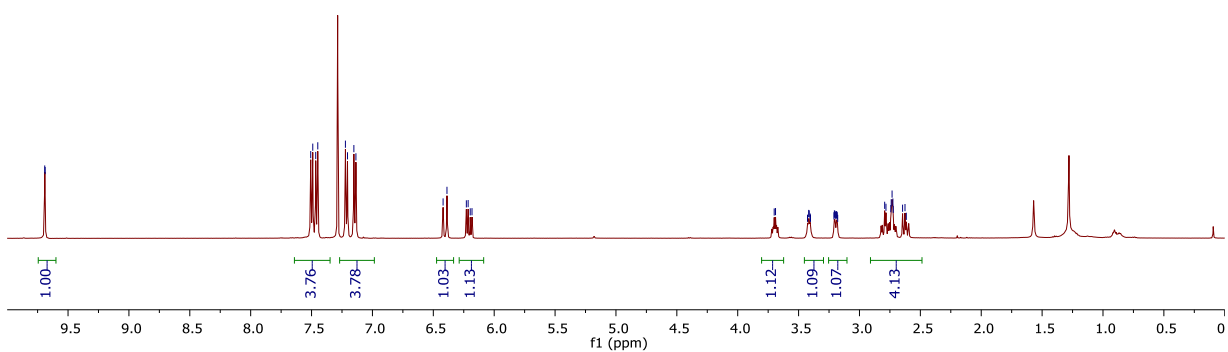

1-rp-198-01-pure-br.3.fid  
207.88  
202.88

140.47  
135.02  
132.42  
132.26  
131.77  
129.03  
127.94  
127.10  
121.92  
121.32

77.27  
77.02  
76.76  
56.88  
46.66  
44.93  
39.33  
39.02

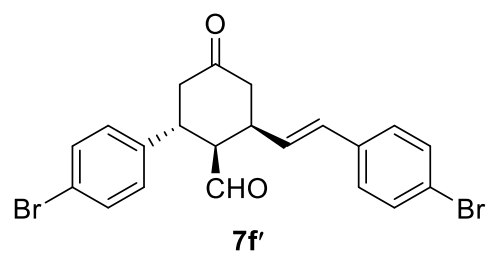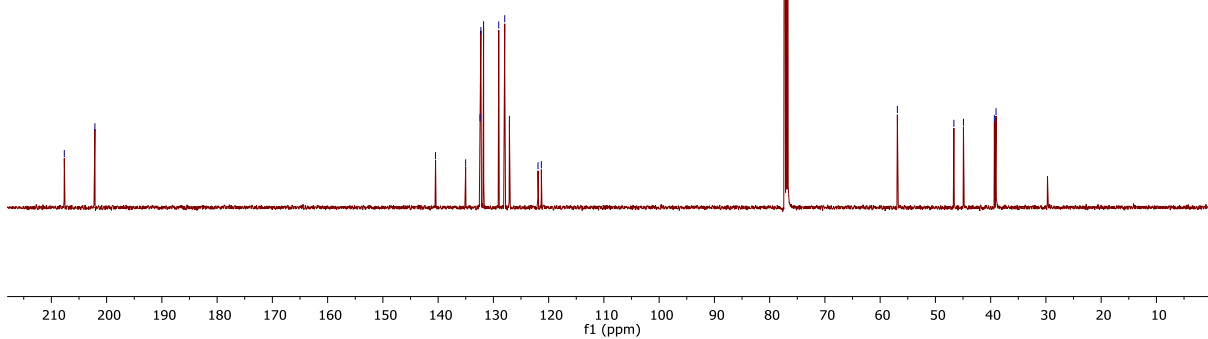

1-rp-1927-pure.1.fid

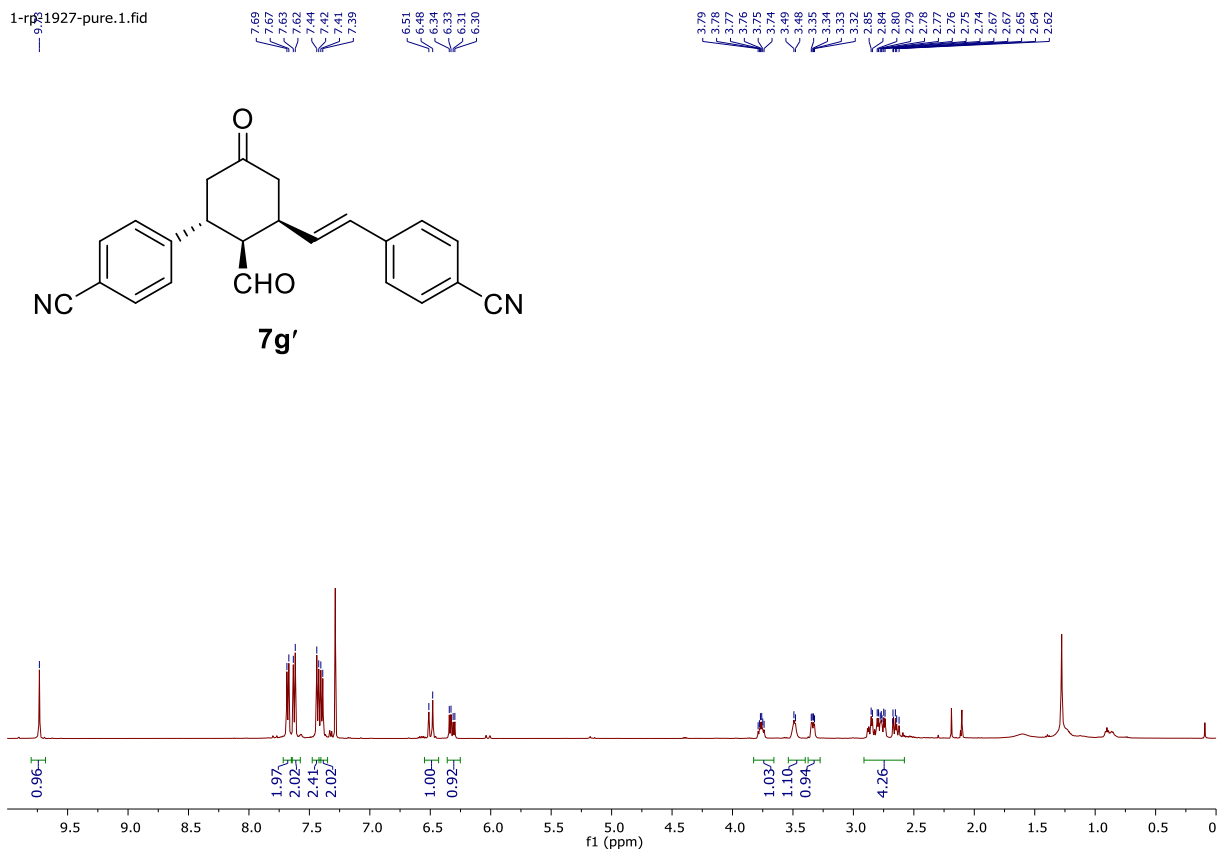

1-rp-1927-pure.3.fid

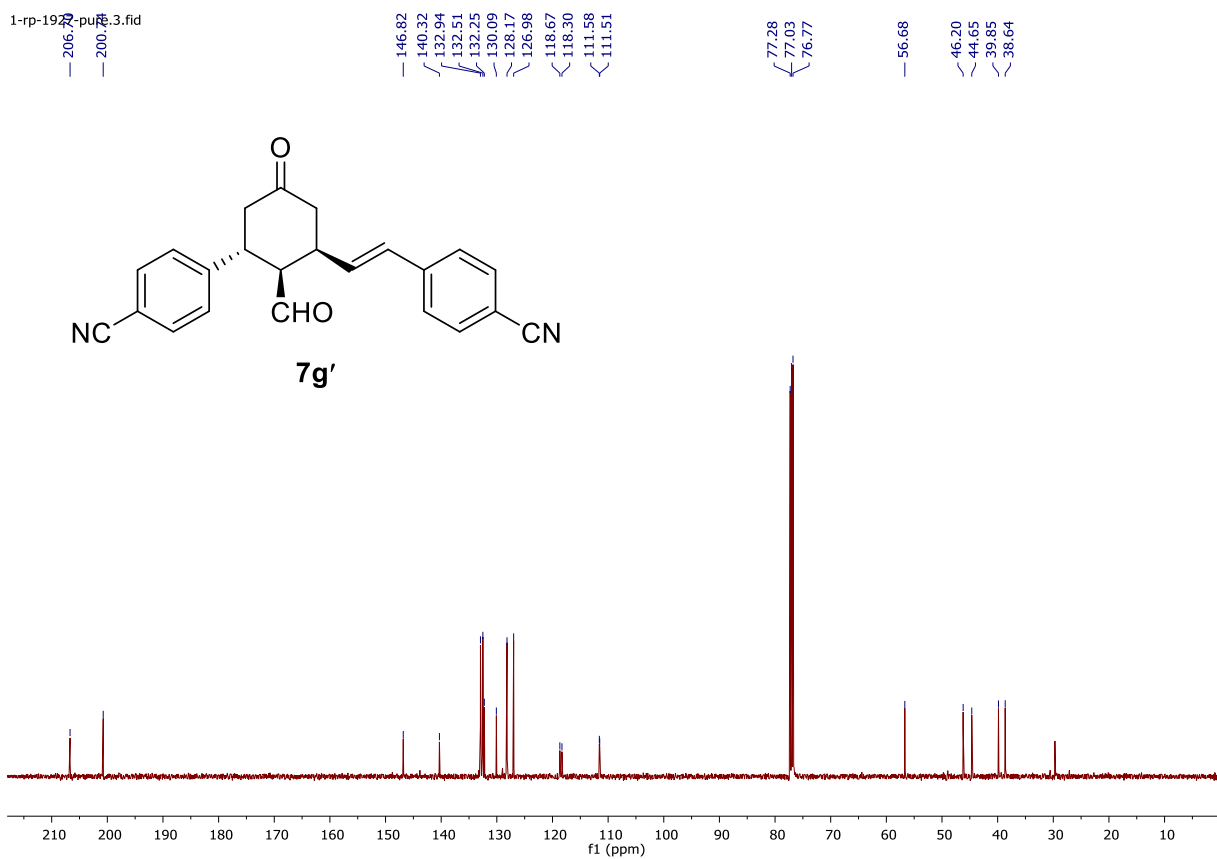

iii) 200.4-dn.1.fid

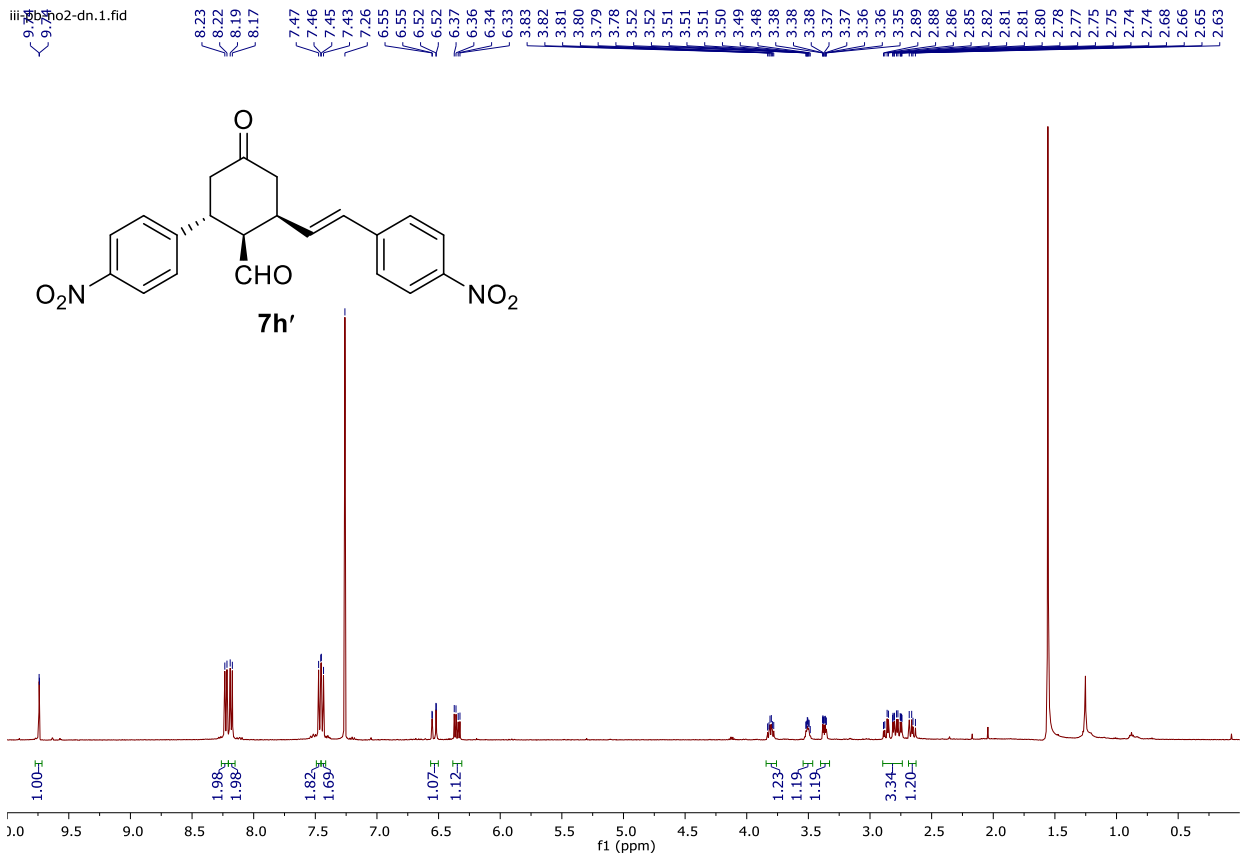

iii) 200.4-dn.2.fid

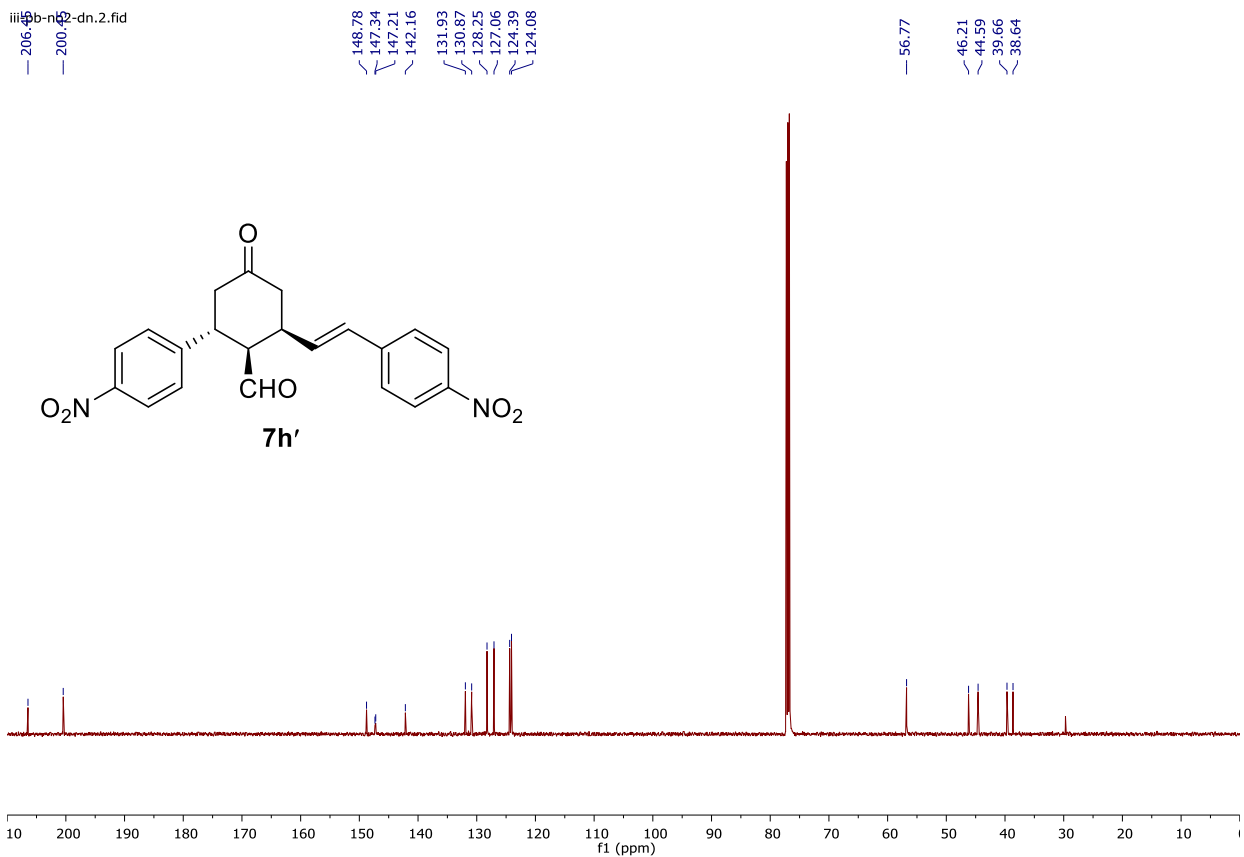

9.79  
7.79  
7.78  
7.77  
7.76  
7.25  
7.25  
7.25  
7.24  
7.23  
7.22  
7.22  
7.22  
7.22  
7.21  
7.20  
7.15  
7.13  
7.13  
6.95  
6.95  
6.94  
6.93  
6.93  
6.93  
6.92  
6.92  
6.91  
6.91  
6.90  
6.89  
6.88  
6.88  
6.86  
6.86  
6.84  
6.84  
6.76  
6.76  
6.73  
6.72  
6.32  
6.31  
6.29  
6.27  
4.14  
4.12  
3.84  
3.82  
3.31  
3.28  
3.27  
3.27  
3.26  
3.26  
2.75  
2.73  
2.72  
2.72  
2.72  
2.68  
2.67  
2.65

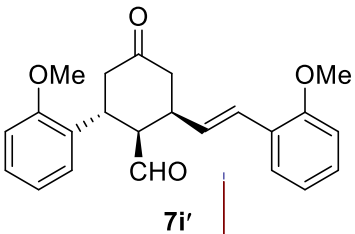

7i'

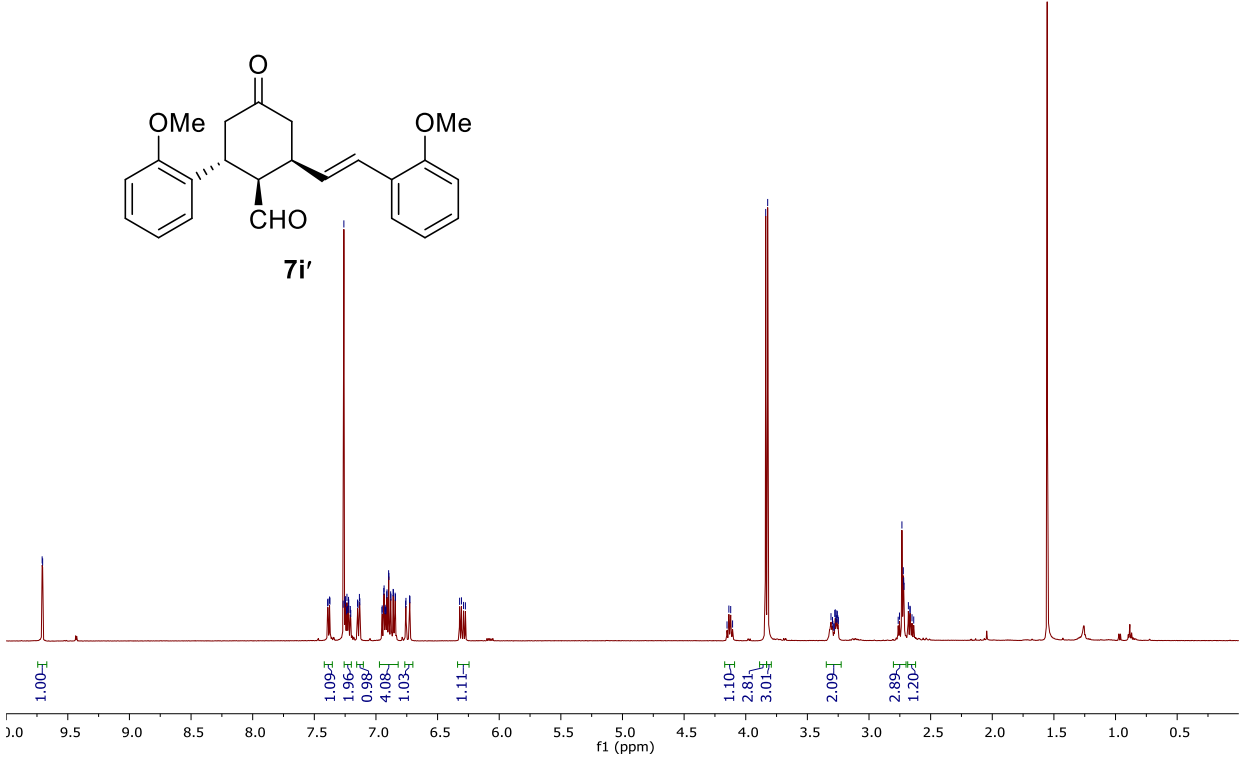

mb2-ome-qdt.2.fid  
209.4  
204.1

156.70  
156.62  
129.70  
128.85  
128.56  
128.38  
127.85  
127.52  
126.78  
125.54  
120.94  
120.59  
110.86  
110.82  
55.45  
55.26  
55.18  
45.16  
44.53  
39.69  
34.20

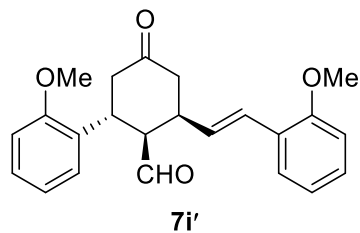

7i'

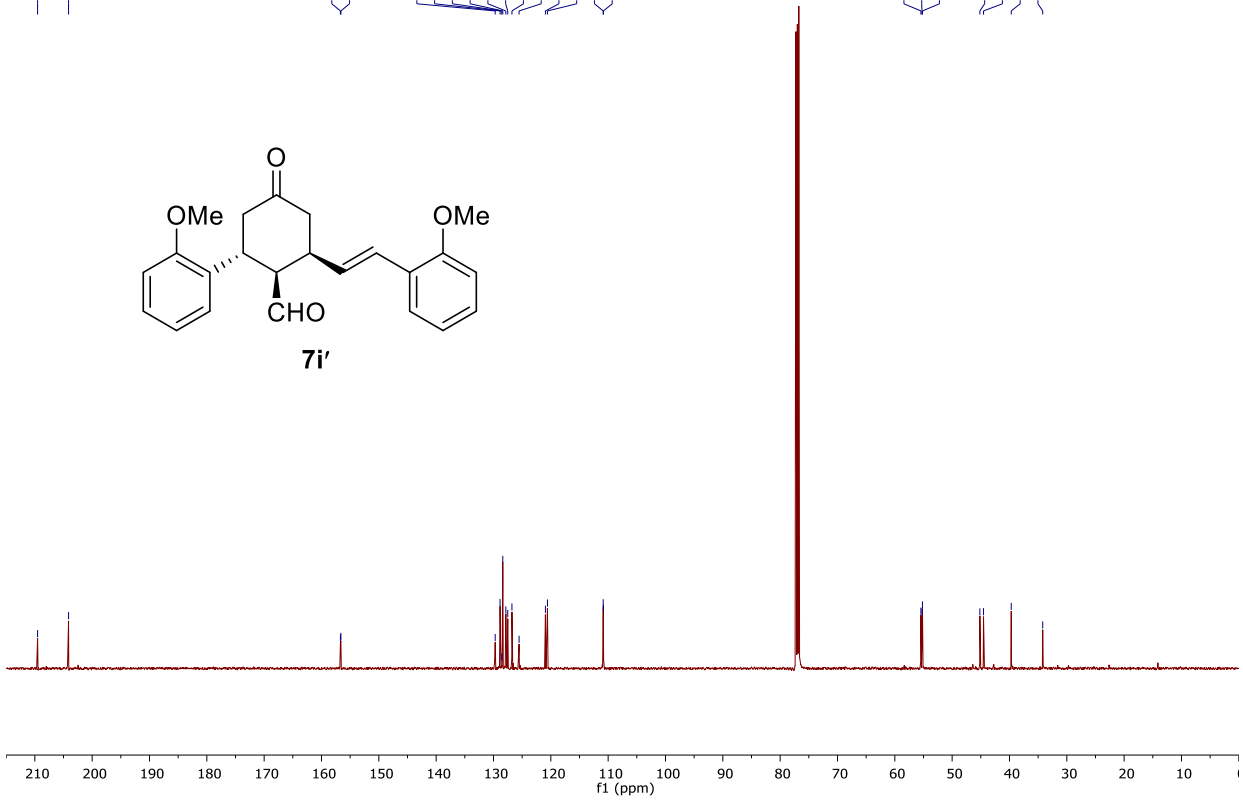

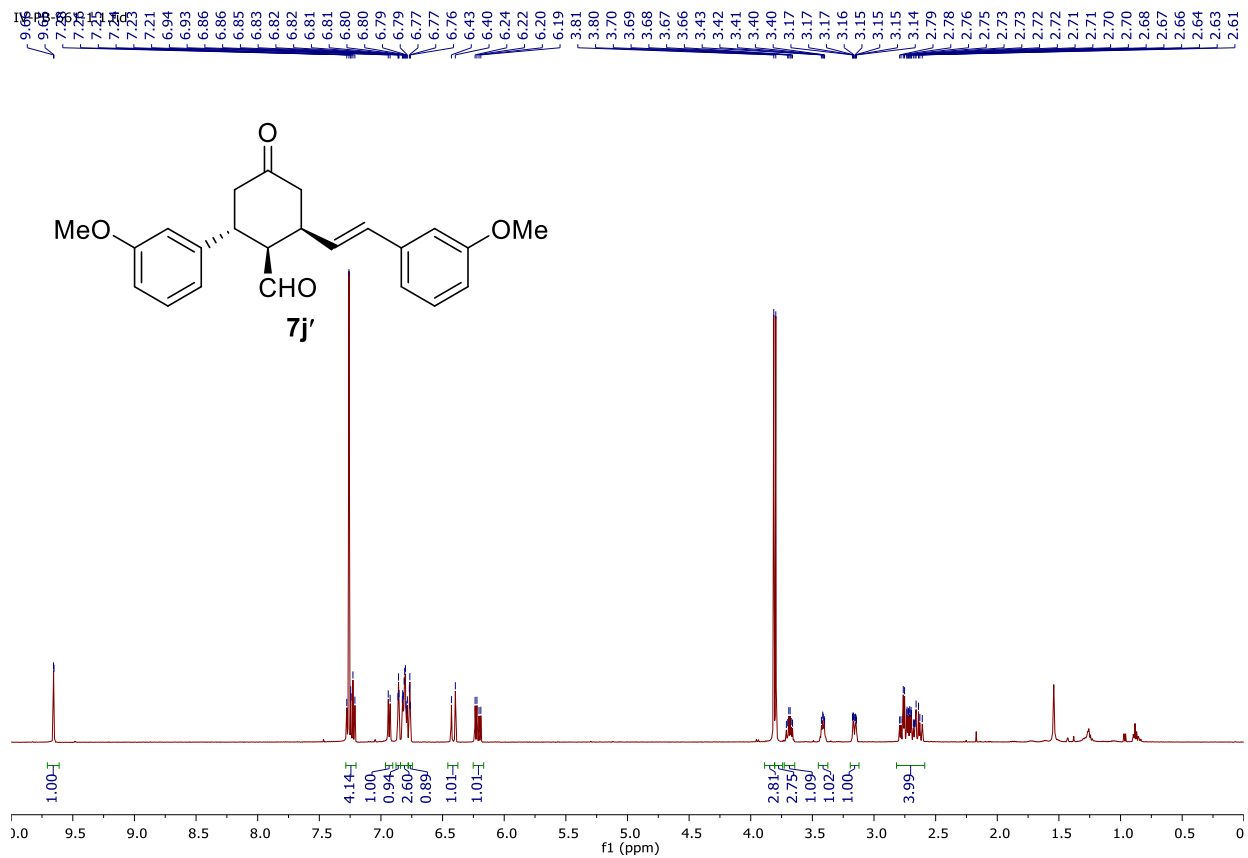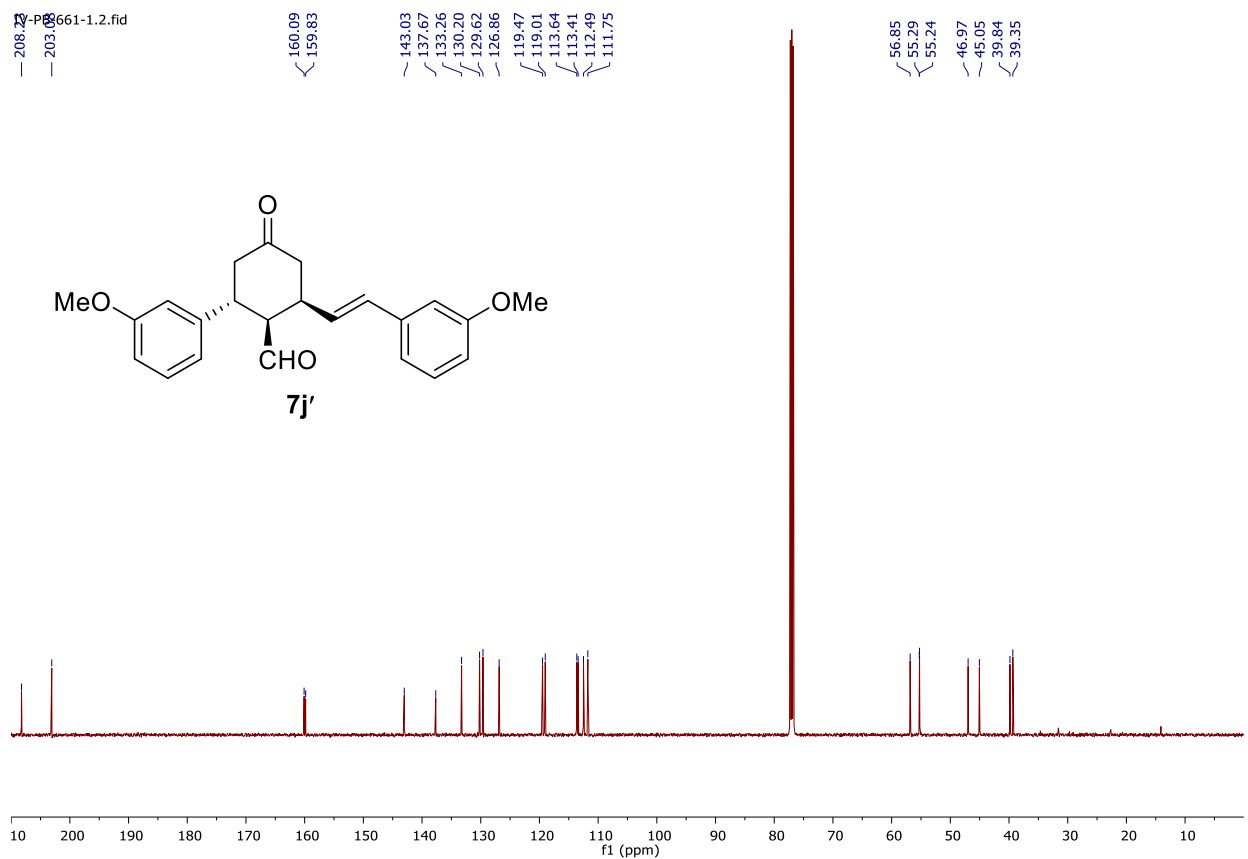

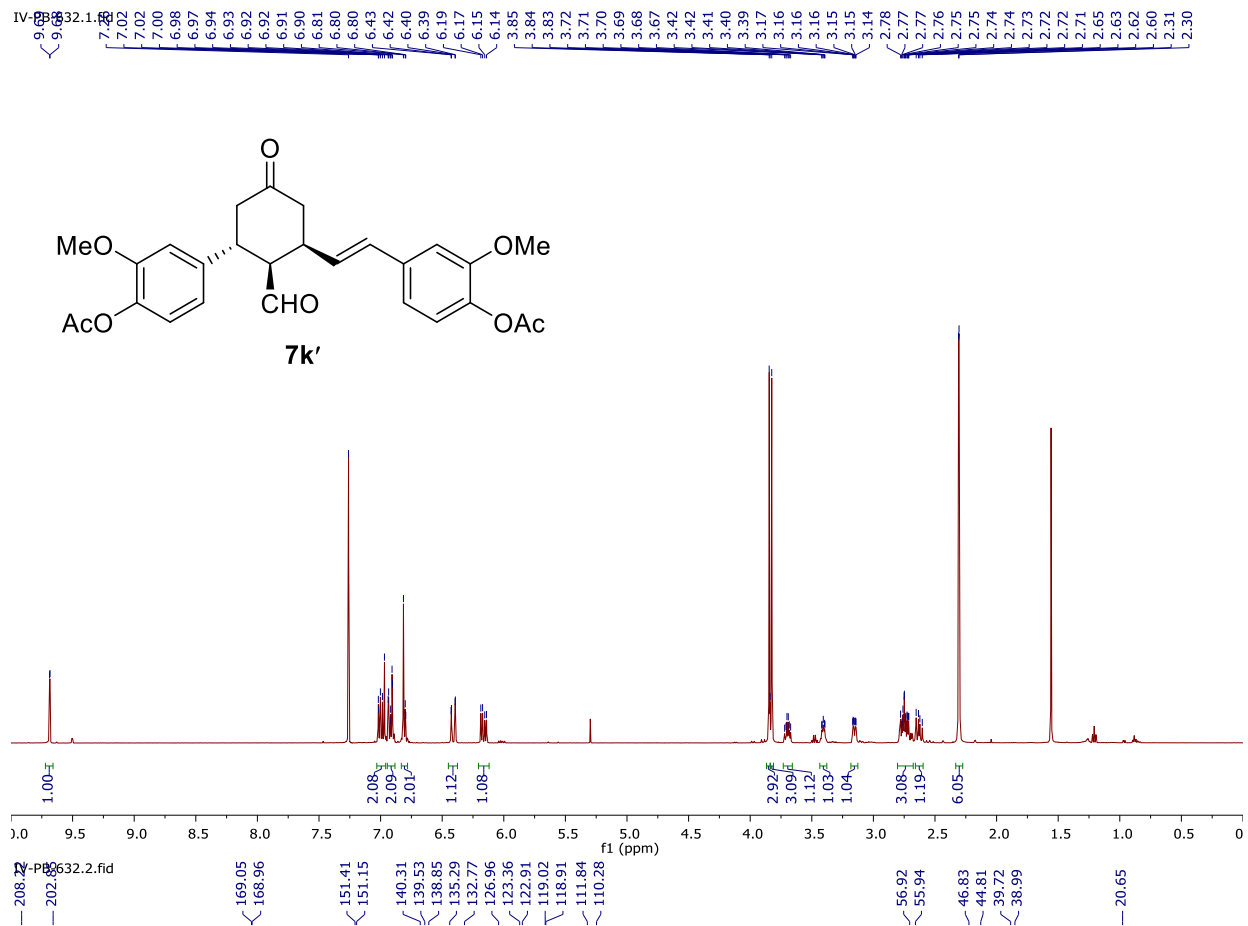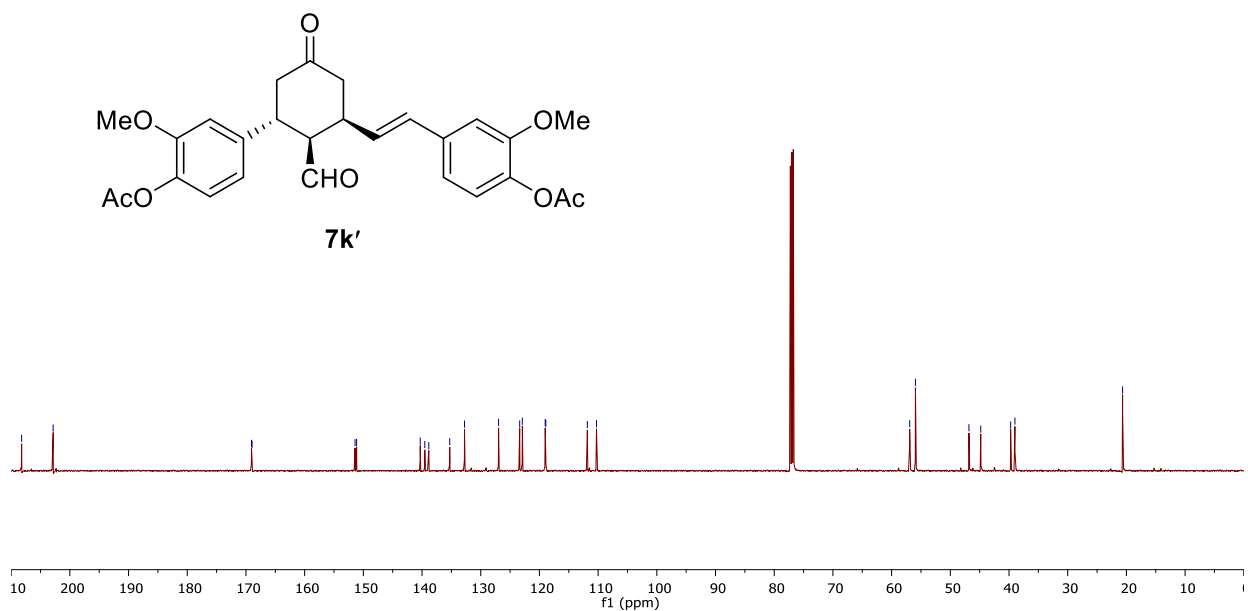

9.85  
8.85  
8.62  
8.55  
8.45  
8.35  
8.25  
8.15  
8.05  
7.98  
7.91  
7.85  
7.80  
7.75  
7.65  
7.55  
7.45  
7.35  
7.25  
7.15  
7.05  
6.95  
6.85  
6.75  
6.65  
6.55  
6.45  
6.35  
6.25  
6.15  
6.05  
5.95  
5.85  
5.75  
5.65  
5.55  
5.45  
5.35  
5.25  
5.15  
5.05  
4.95  
4.85  
4.75  
4.65  
4.55  
4.45  
4.35  
4.25  
4.15  
4.05  
3.95  
3.85  
3.75  
3.65  
3.55  
3.45  
3.35  
3.25  
3.15  
3.05  
2.95  
2.85  
2.75  
2.65  
2.55  
2.45  
2.35  
2.25  
2.15  
2.05  
1.95  
1.85  
1.75  
1.65  
1.55  
1.45  
1.35  
1.25  
1.15  
1.05  
0.95  
0.85  
0.75  
0.65  
0.55  
0.45  
0.35  
0.25  
0.15  
0.05

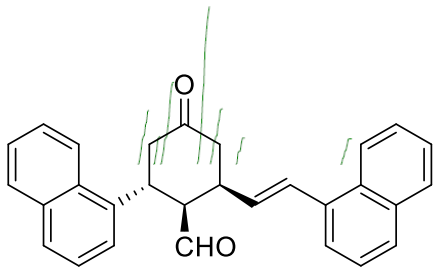

71'

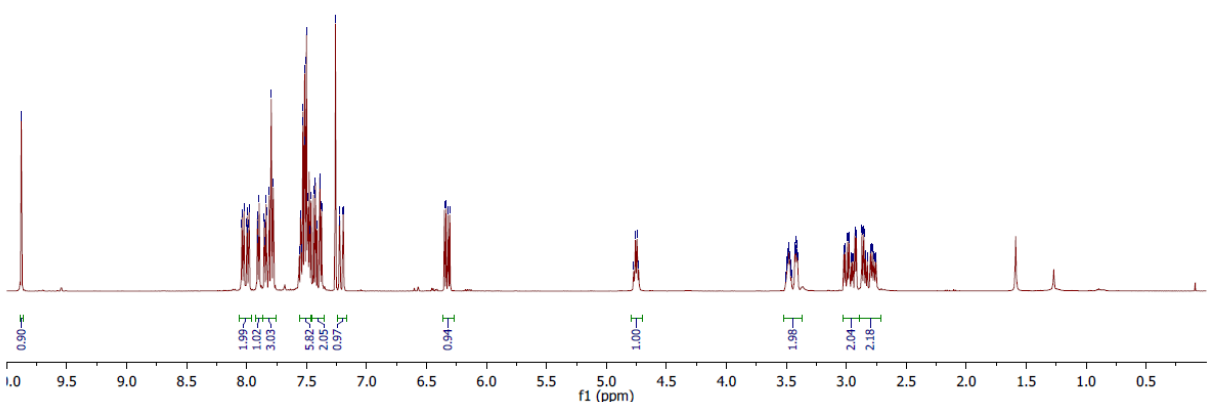

1-NS-128-1.2.fid

208.6  
203.1  
137.70  
134.27  
134.15  
133.55  
133.07  
130.83  
130.60  
130.55  
130.38  
128.56  
128.11  
128.10  
126.86  
126.34  
126.05  
125.95  
125.55  
125.53  
124.49  
123.97  
123.66  
122.29  
55.96  
45.76  
44.80  
39.19  
34.55

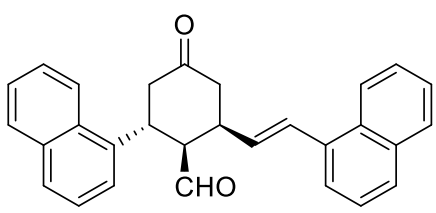

71'

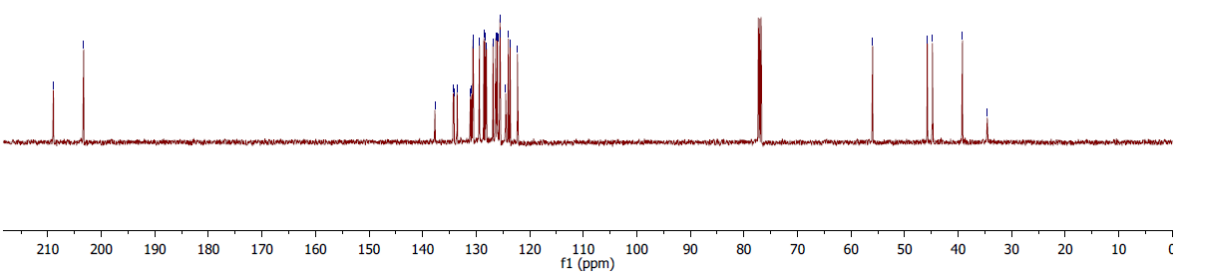

9.612  
9.581  
7.777  
7.748  
7.718  
7.708  
7.703  
7.700  
7.19  
7.18  
6.99  
6.98  
6.98  
6.97  
6.97  
6.96  
6.96  
6.92  
6.92  
6.60  
6.57  
6.57  
6.13  
6.12  
6.10  
6.09  
4.11  
4.10  
4.09  
4.09  
3.34  
3.34  
3.33  
3.33  
3.32  
3.32  
3.31  
3.15  
3.15  
3.14  
3.14  
3.13  
3.13  
2.91  
2.91  
2.90  
2.90  
2.88  
2.88  
2.87  
2.87  
2.77  
2.77  
2.75  
2.75  
2.74  
2.74  
2.73  
2.72  
2.72  
2.71  
2.71  
2.70  
2.70  
2.68  
2.68  
2.66  
2.66  
2.63

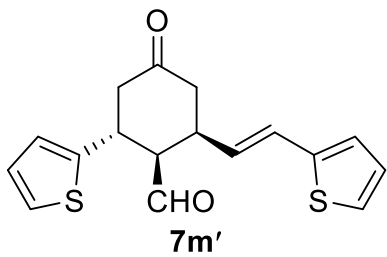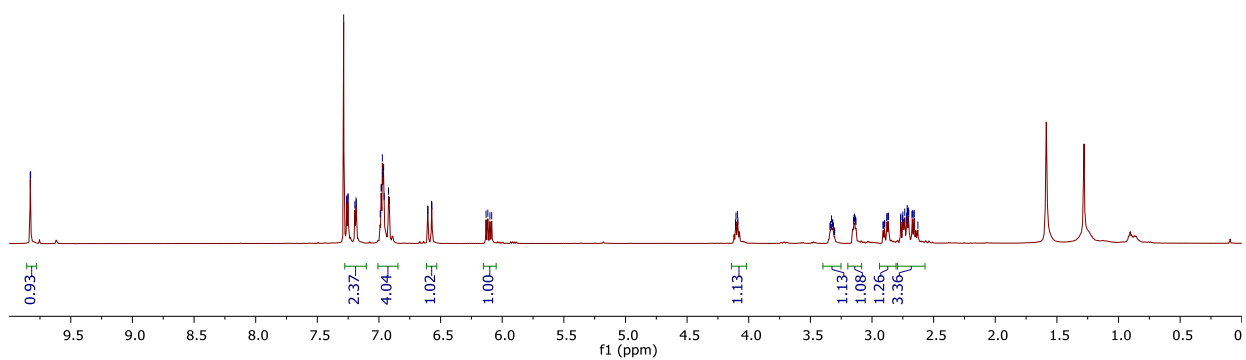

1-rp-197-p1e.3.fid

207.37  
202  
145.15  
141.20  
127.47  
127.22  
126.30  
126.27  
126.24  
125.29  
124.66  
124.58  
77.27  
77.01  
76.76  
57.94  
46.52  
44.57  
38.82  
35.51

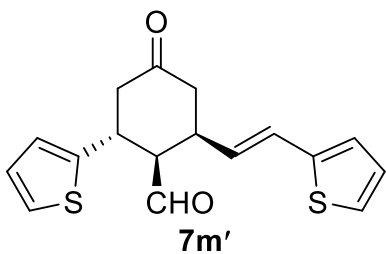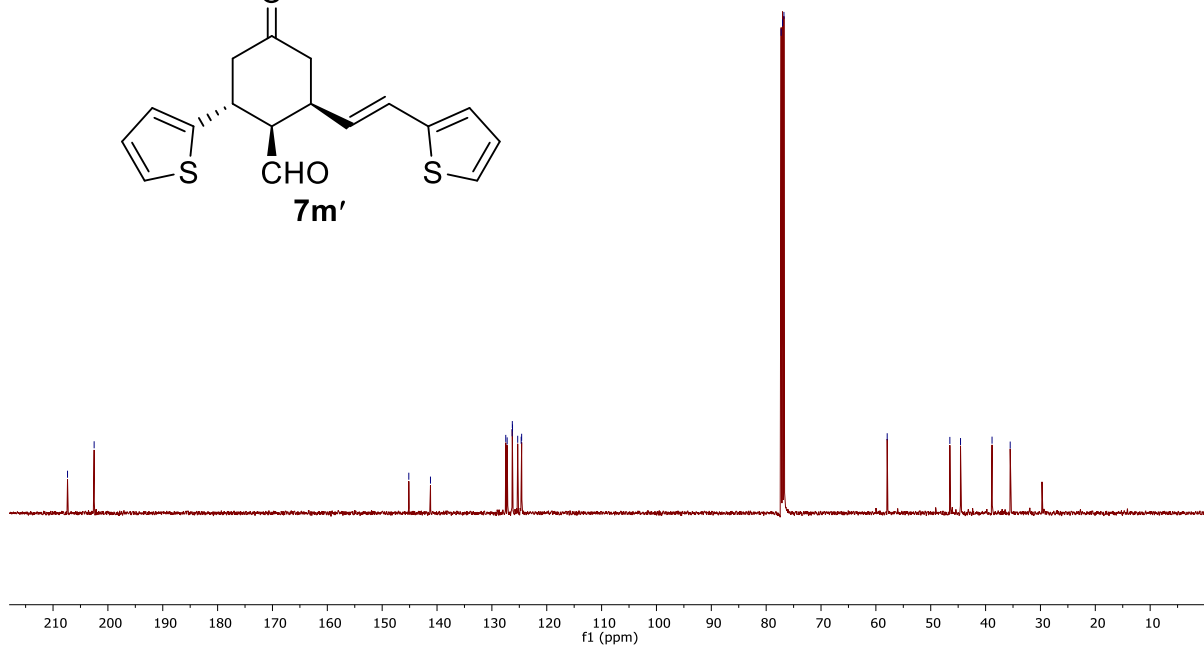



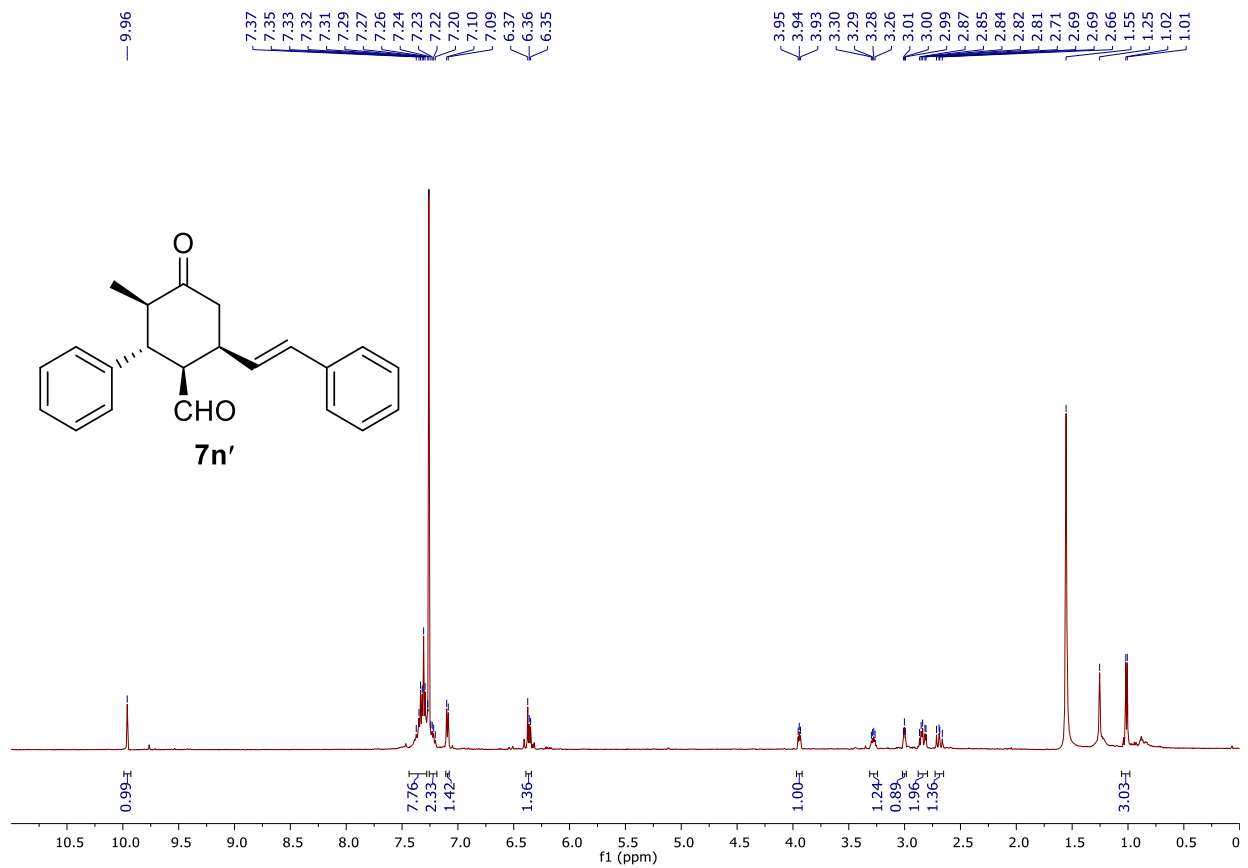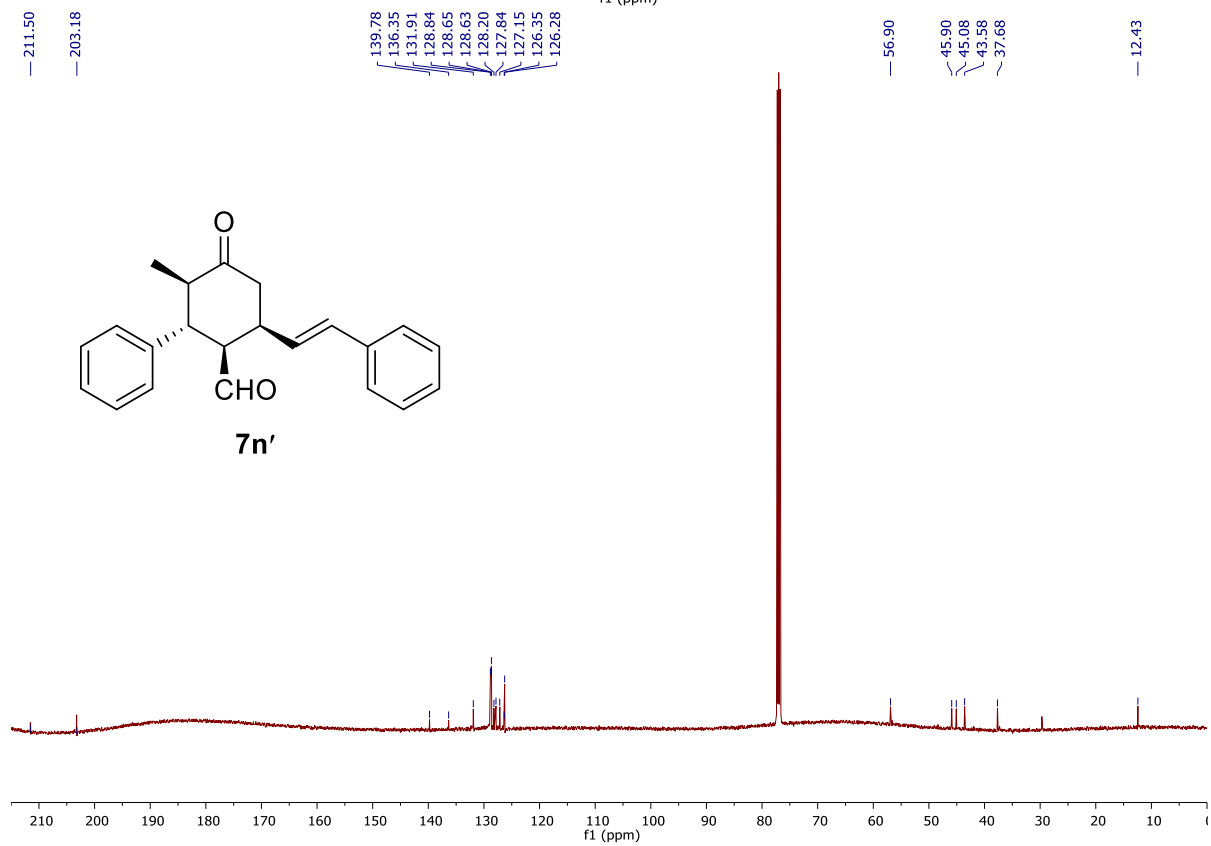

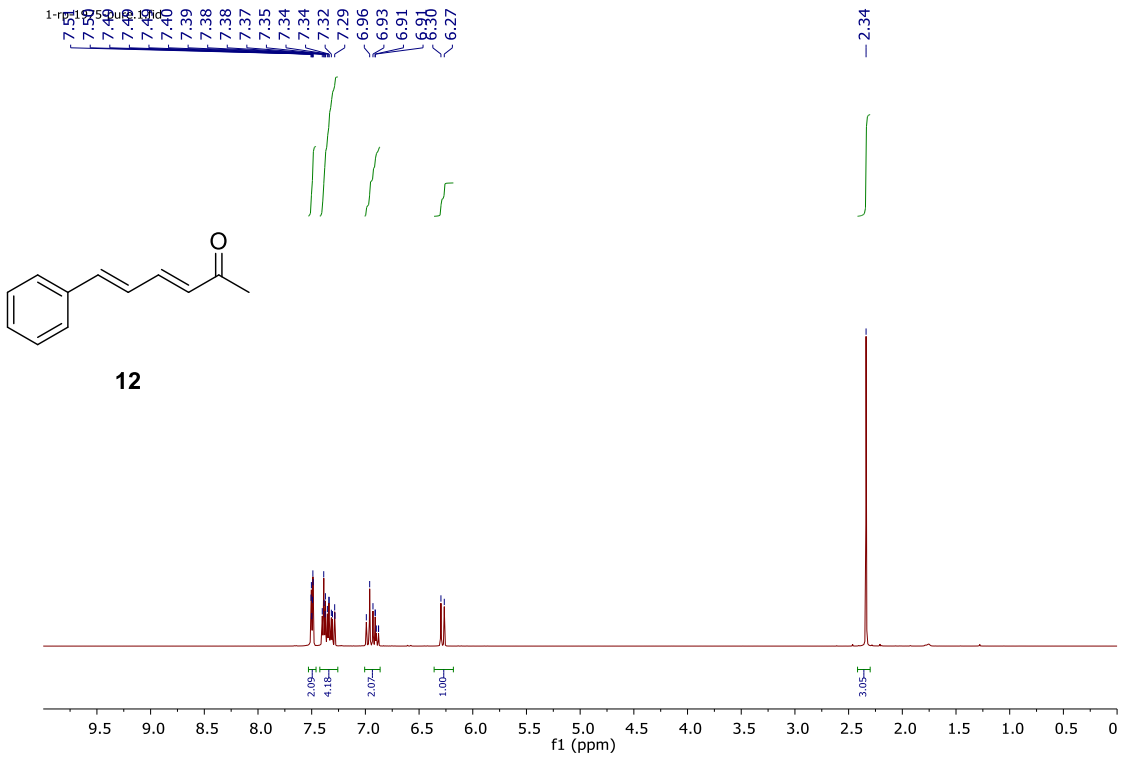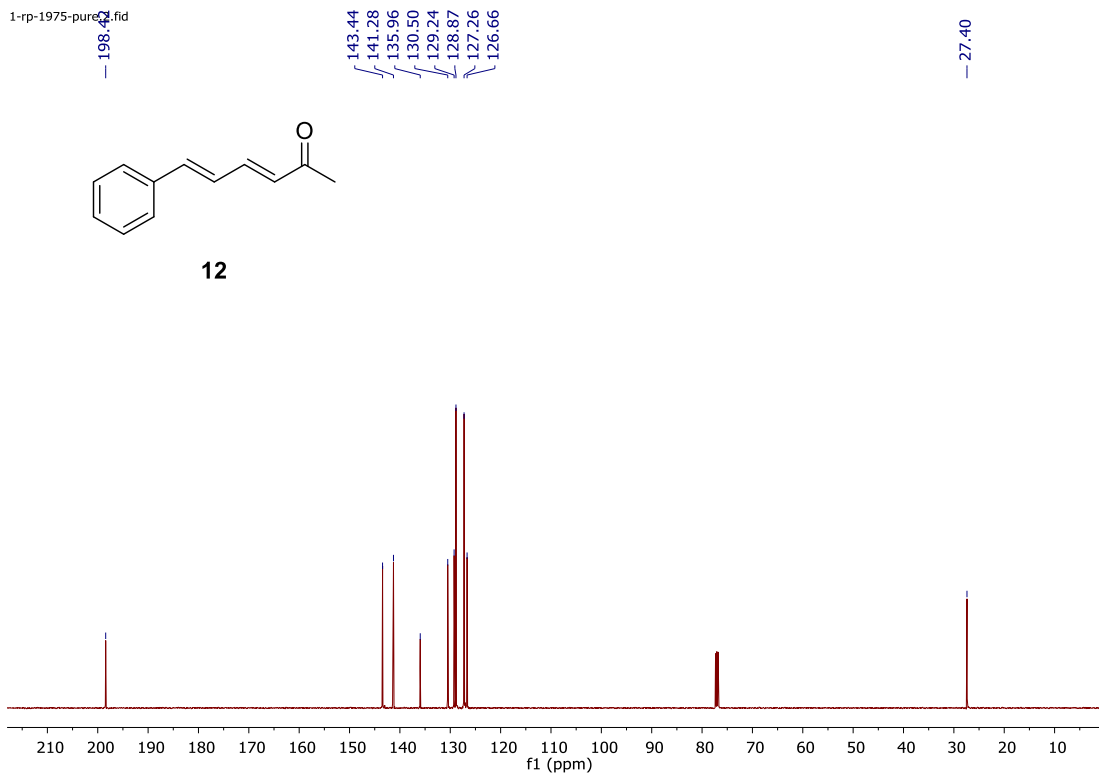

IV-PB-744.1.fid

7.29  
7.28  
7.27  
7.26  
7.07  
7.06  
6.86  
6.85  
6.84  
6.83  
6.82  
6.37  
6.34  
6.04  
6.02  
6.00  
5.99  
5.80  
5.77

3.81  
3.78  
3.66  
3.24  
3.23  
3.10  
3.09  
3.08  
3.05  
2.80  
2.79  
2.77  
2.76  
2.69  
2.68  
2.67  
2.66  
2.65  
2.64  
2.61  
2.59

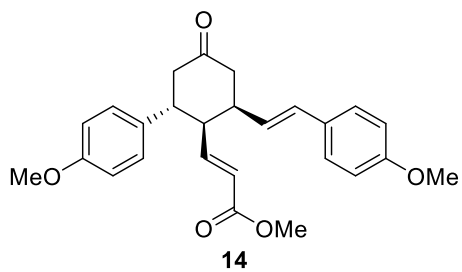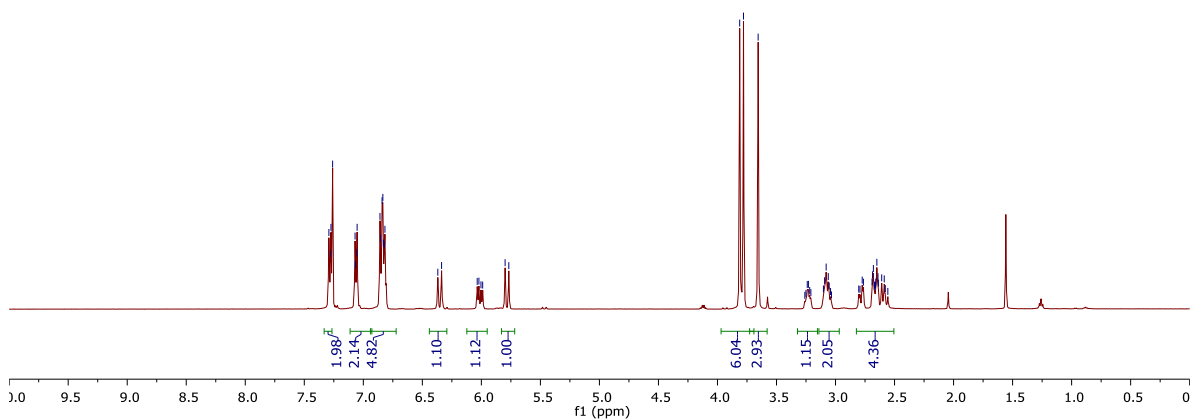

IV-PB-744.3.fid

209.78

166.45  
159.49  
158.58  
148.92  
134.33  
132.80  
129.58  
128.43  
127.74  
124.85  
123.36  
114.35  
114.13

55.48  
55.38  
51.67  
49.29  
48.09  
45.71  
43.52  
43.44

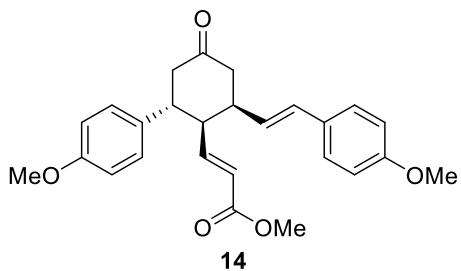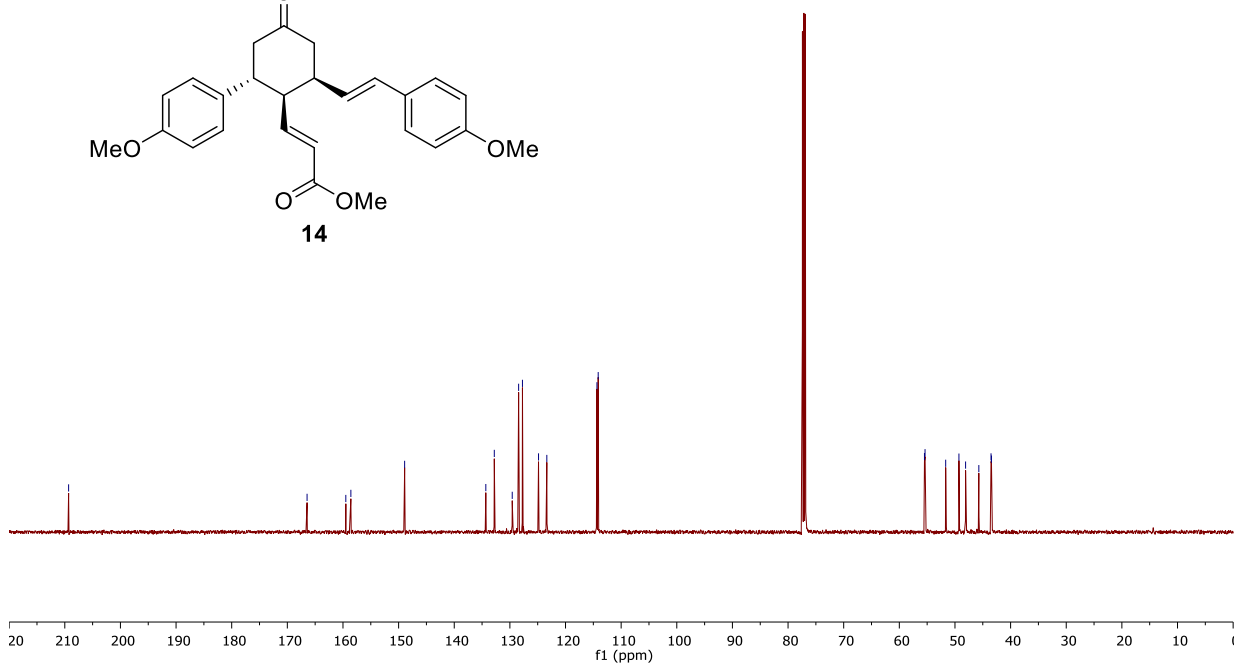

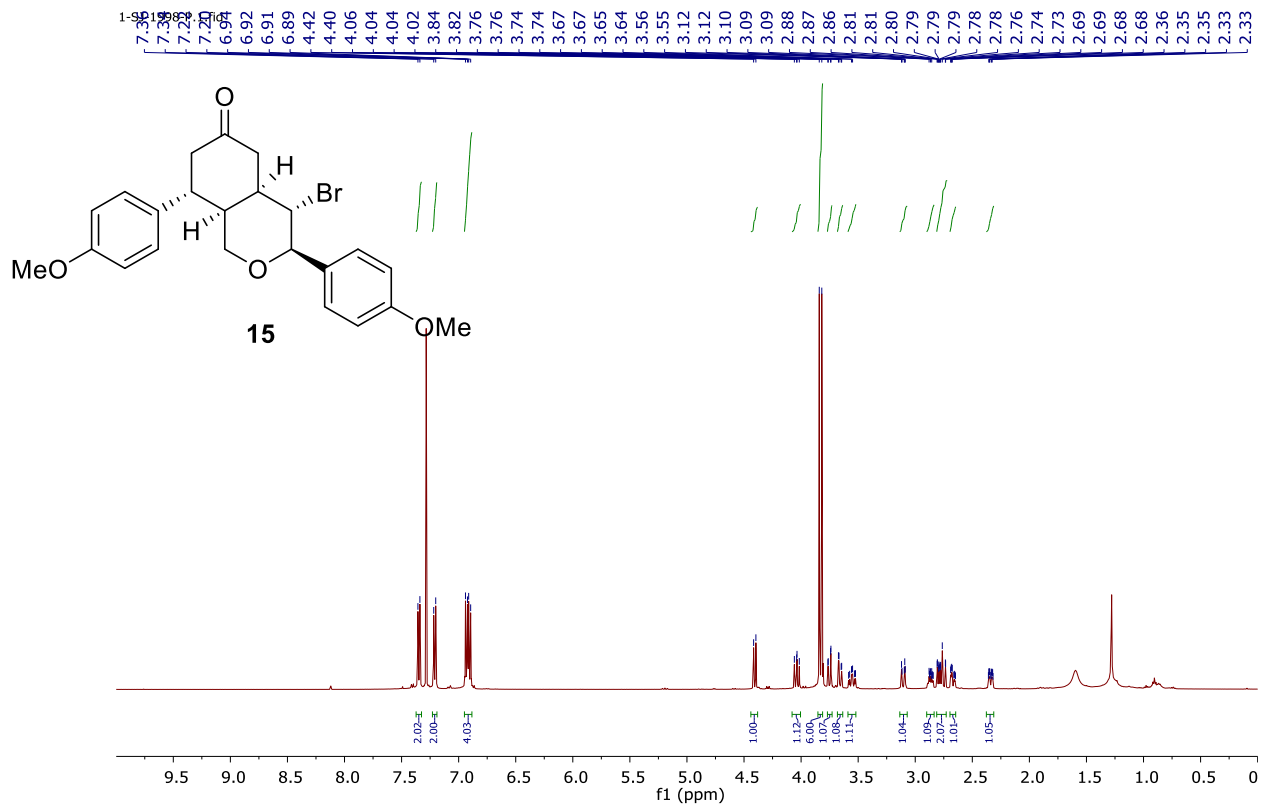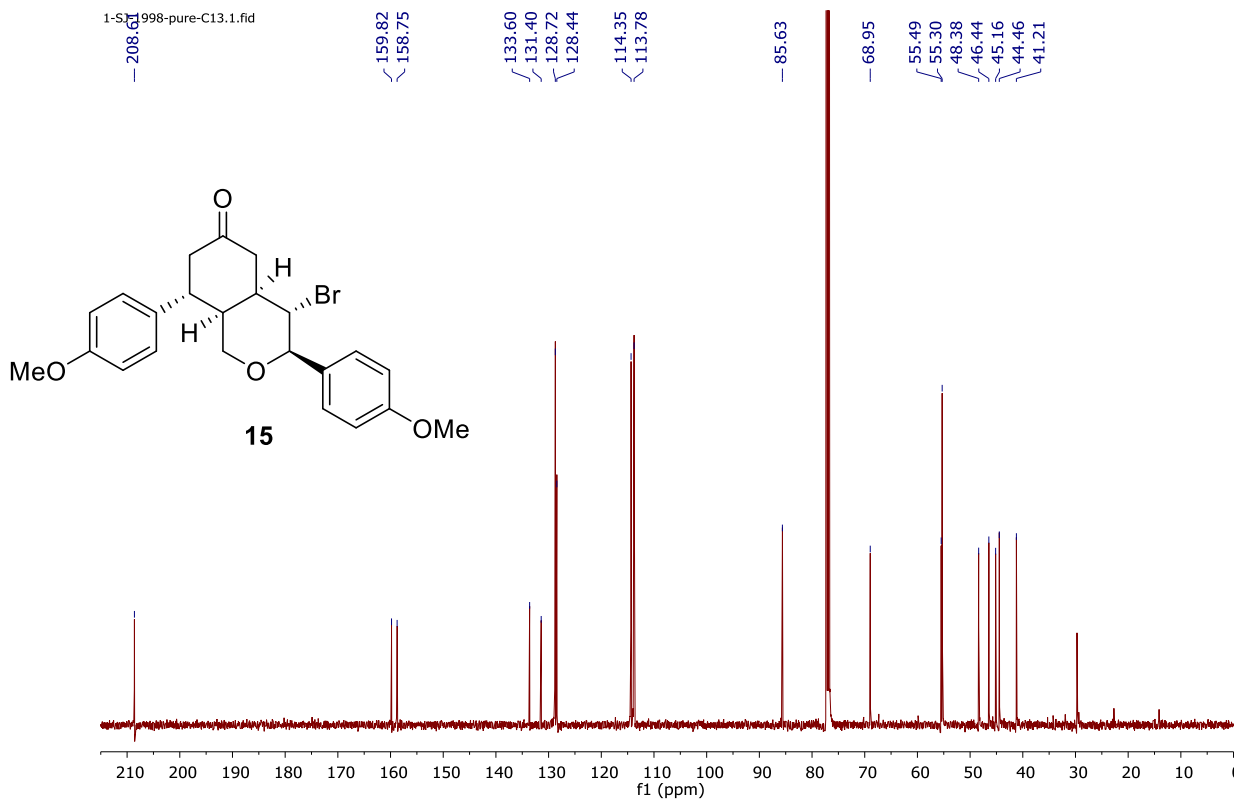

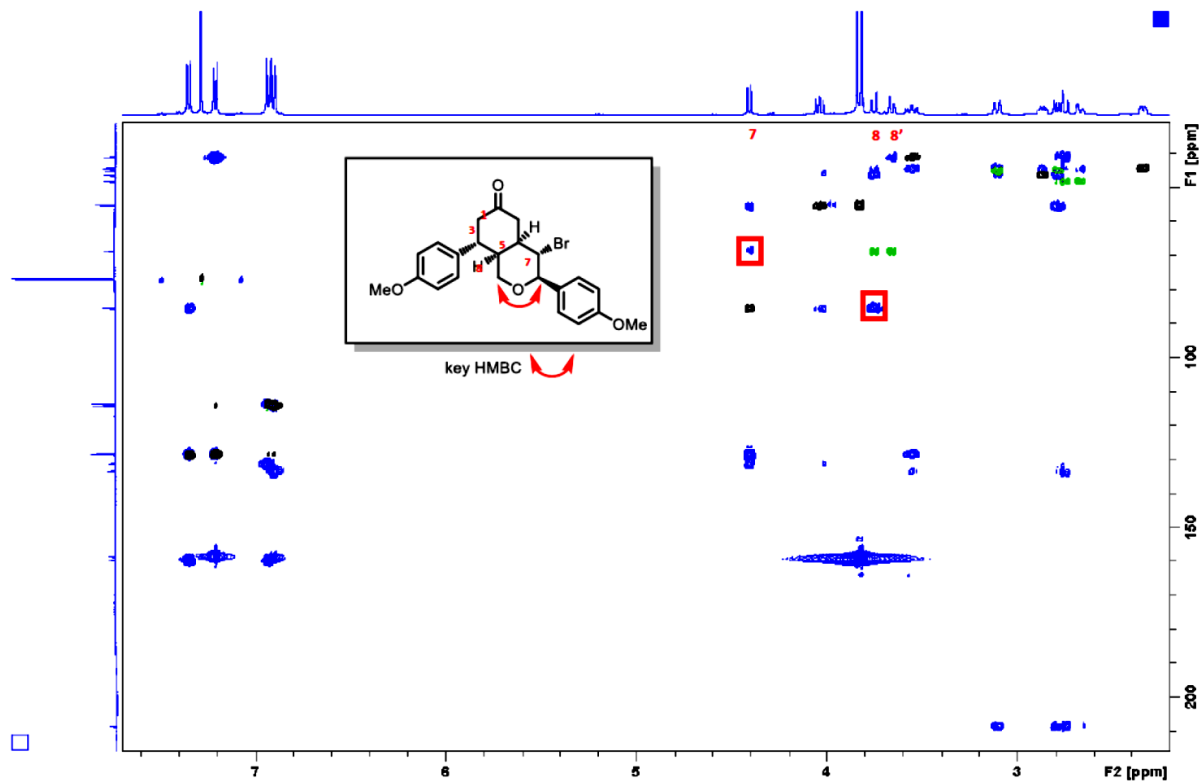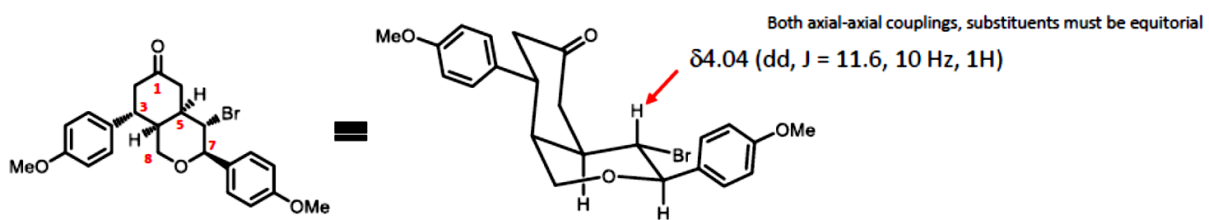

### Stereochemistry assignment of compound 15

SJ-1802.1.fid

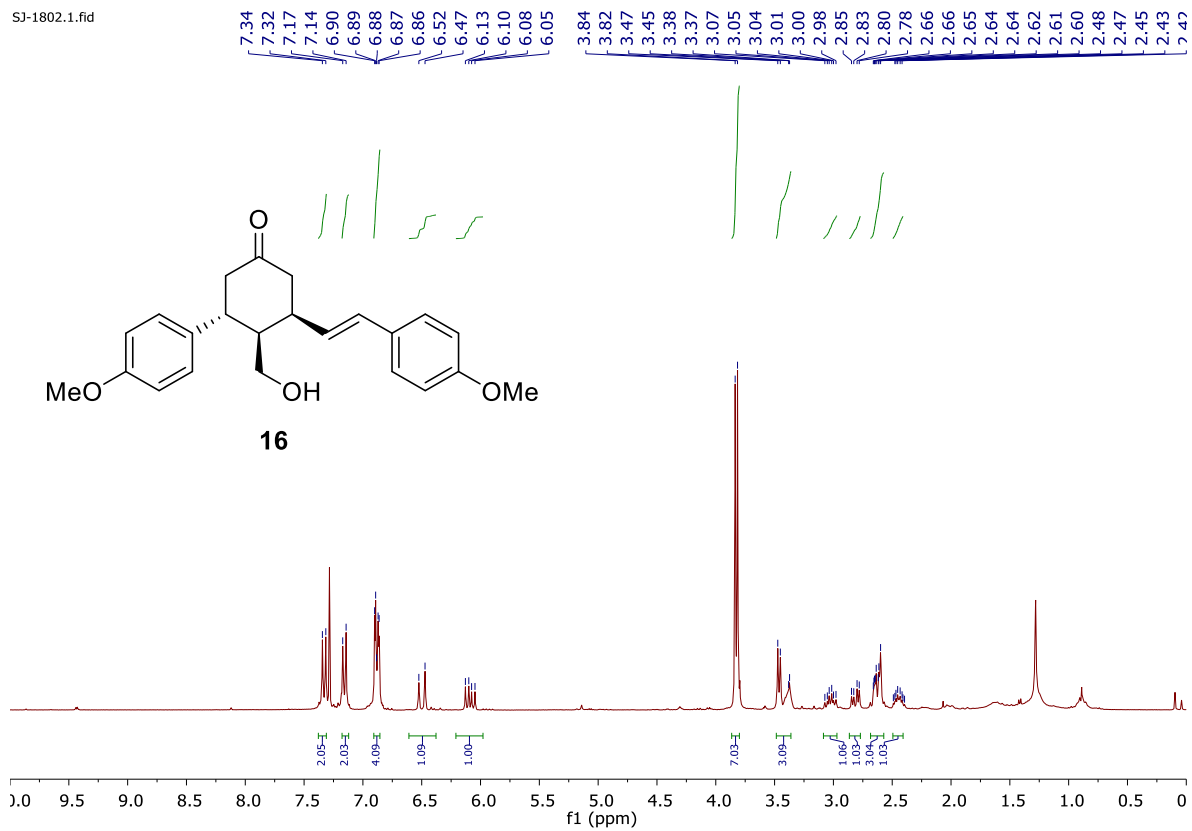

SJ-1802.2

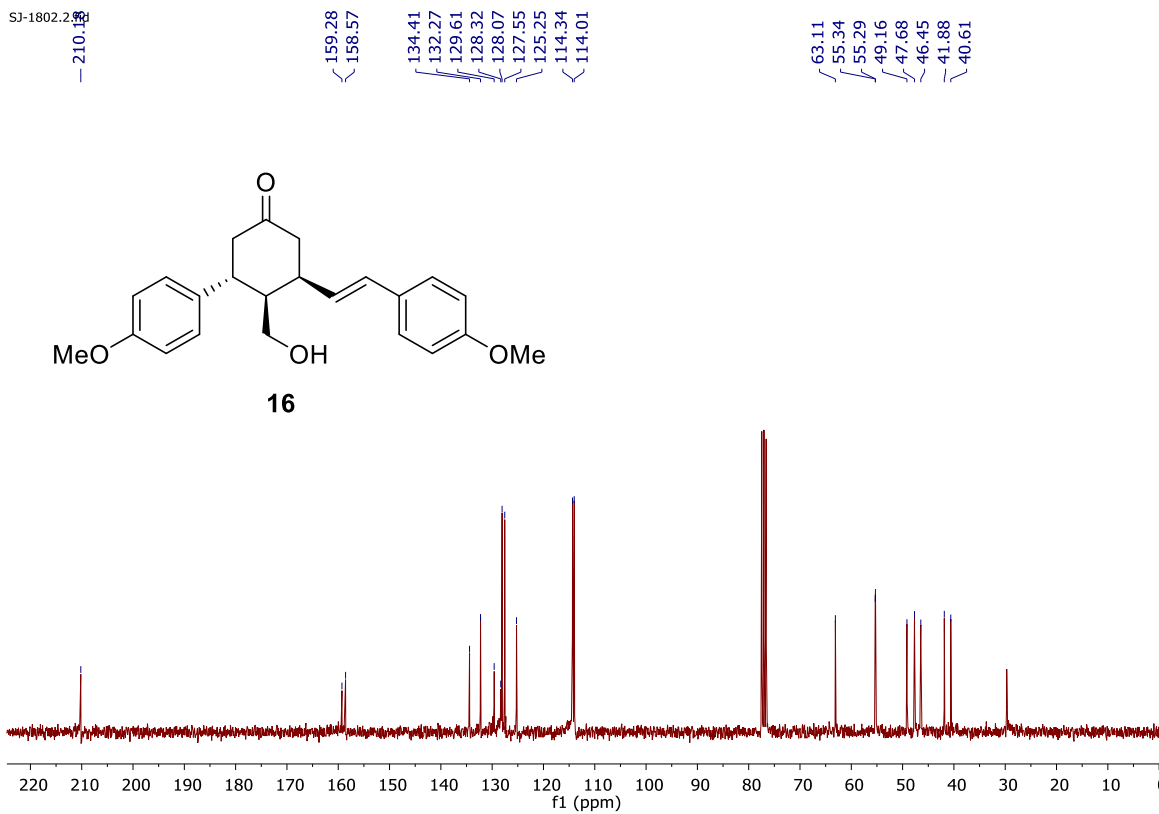

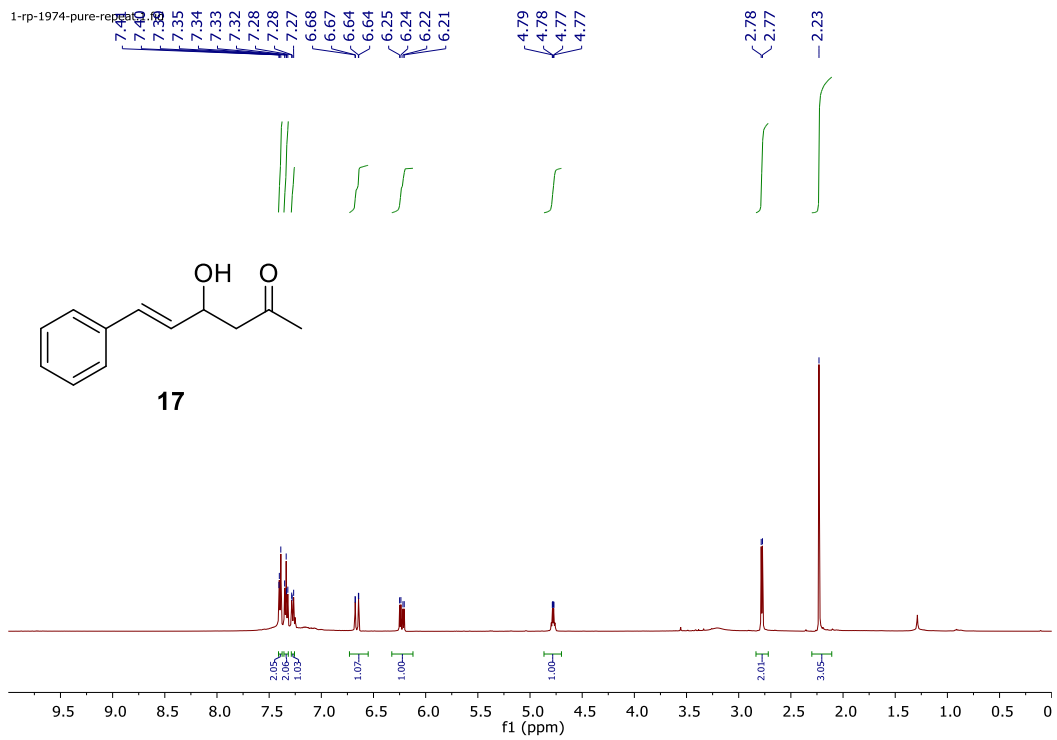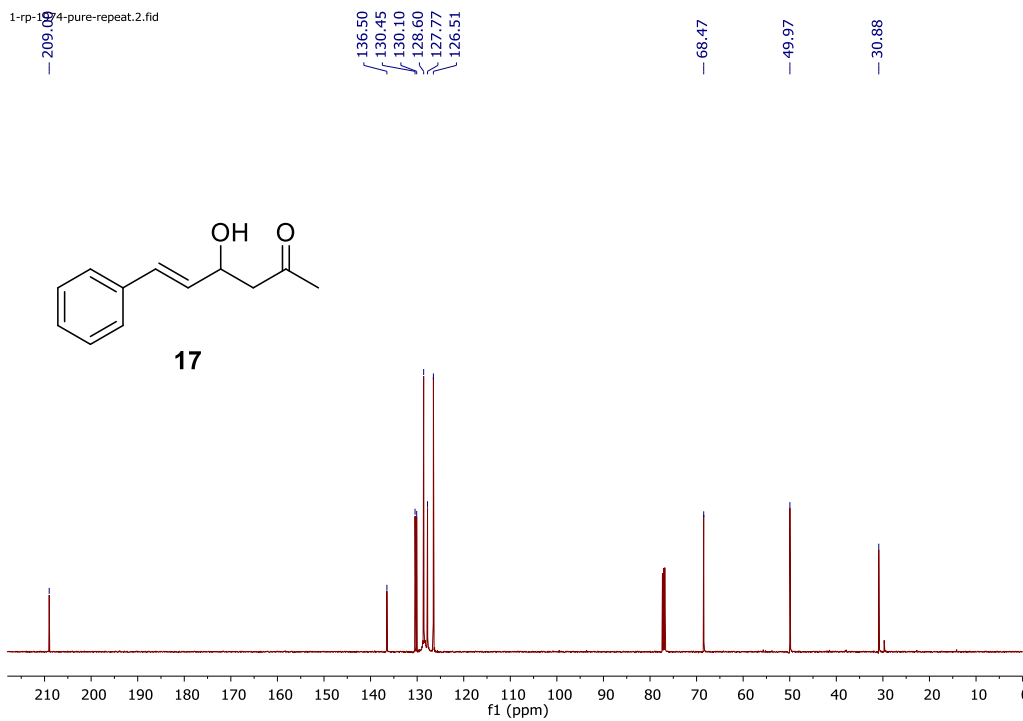

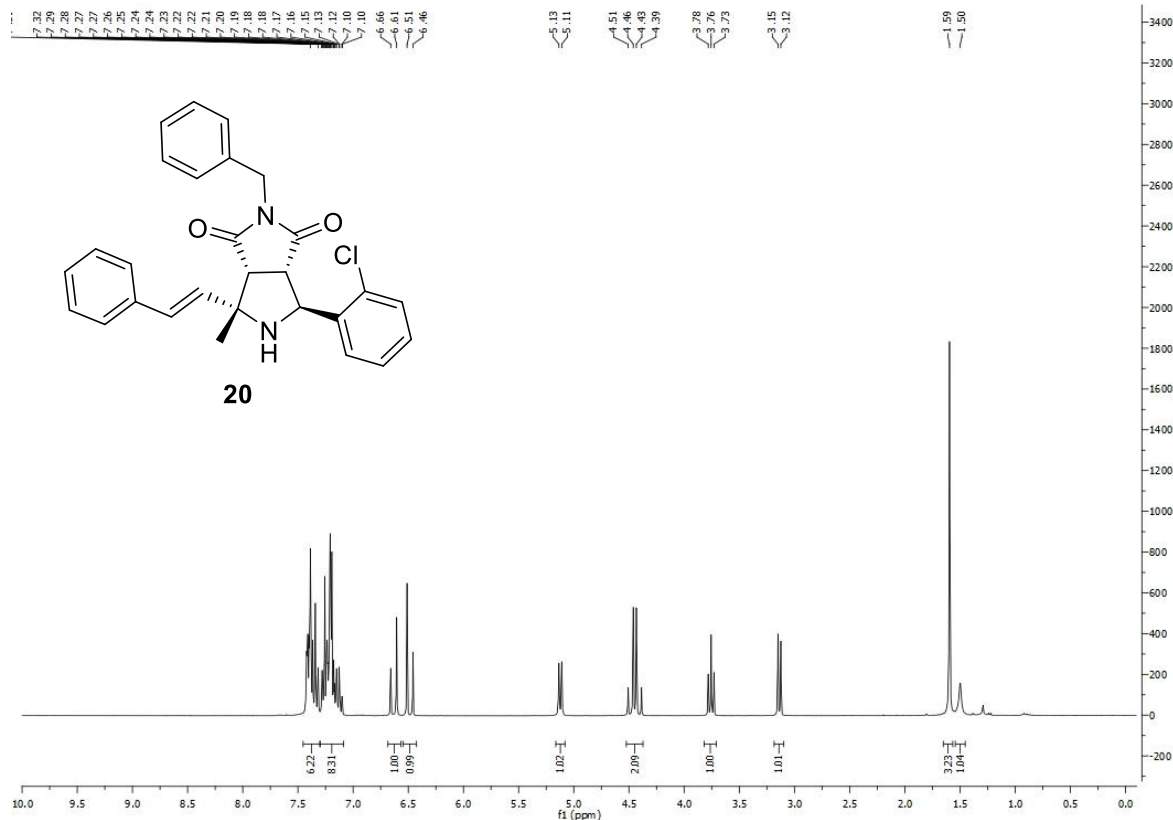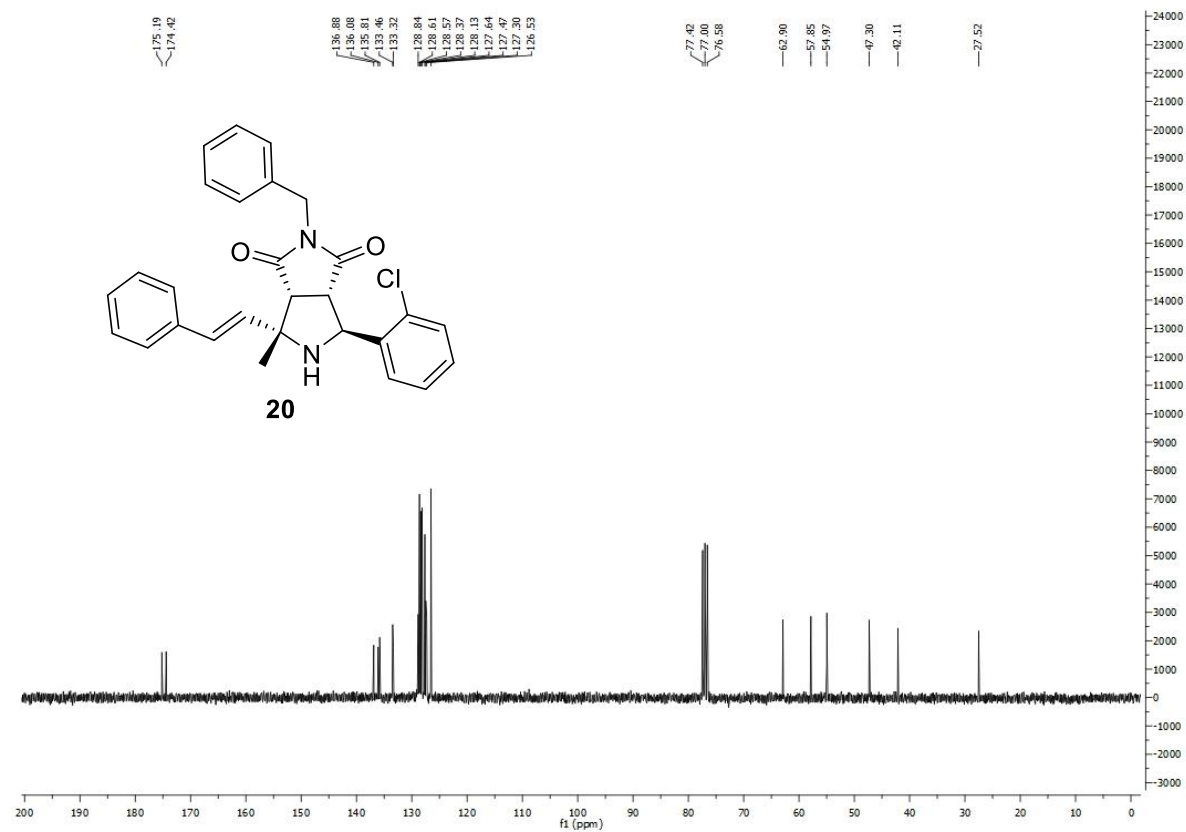



# 9. HPLC Chromatograms

## ==== Shimadzu LCsolution Analysis Report ====

C:\LabSolutions\LCsolution\I-PB-189-RAC-20%-0.7ML.lcd  
 Acquired by : Admin  
 Sample Name :  
 Sample ID :  
 Vial # :  
 Injection Volume : 1 uL  
 Data File Name : I-PB-189-RAC-20%-0.7ML.lcd  
 Method File Name : ChiralPak ID-20.0%-0.7 mL-254nm.lcm  
 Batch File Name :  
 Report File Name : Default.lcr  
 Data Acquired : 8/16/2019 1:16:42 PM  
 Data Processed : 9/5/2019 2:05:31 PM

### <Chromatogram>

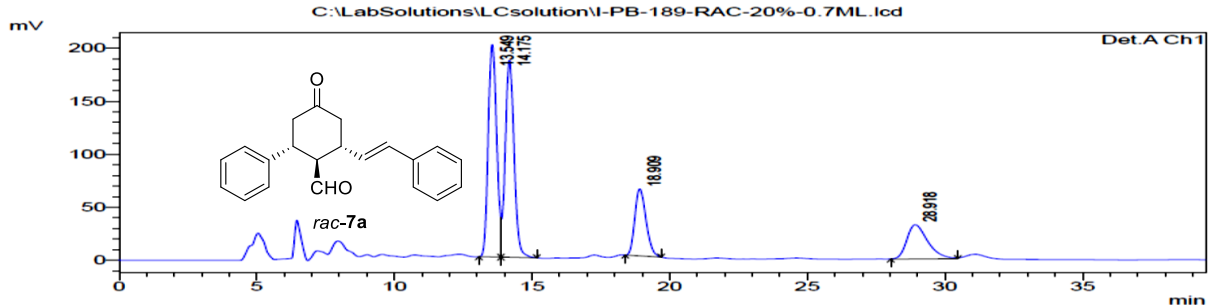

1 Det.A Ch1/220nm

| PeakTable |           |          |        |         |          |
|-----------|-----------|----------|--------|---------|----------|
| Peak#     | Ret. Time | Area     | Height | Area %  | Height % |
| 1         | 13.549    | 4270538  | 200394 | 35.738  | 41.599   |
| 2         | 14.175    | 4178528  | 185846 | 34.968  | 38.579   |
| 3         | 18.909    | 1794547  | 63219  | 15.018  | 13.123   |
| 4         | 28.918    | 1706086  | 32272  | 14.277  | 6.699    |
| Total     |           | 11949699 | 481730 | 100.000 | 100.000  |

## ==== Shimadzu LCsolution Analysis Report ====

C:\LabSolutions\LCsolution\ii-pb-388-20%-0.7ml.lcd  
 Acquired by : Admin  
 Sample Name :  
 Sample ID :  
 Vial # :  
 Injection Volume : 1 uL  
 Data File Name : ii-pb-388-20%-0.7ml.lcd  
 Method File Name : ChiralPak ID-20%-0.7 mL-254nm.lcm  
 Batch File Name :  
 Report File Name : Default.lcr  
 Data Acquired : 9/5/2019 2:40:07 PM  
 Data Processed : 9/5/2019 3:18:25 PM

### <Chromatogram>

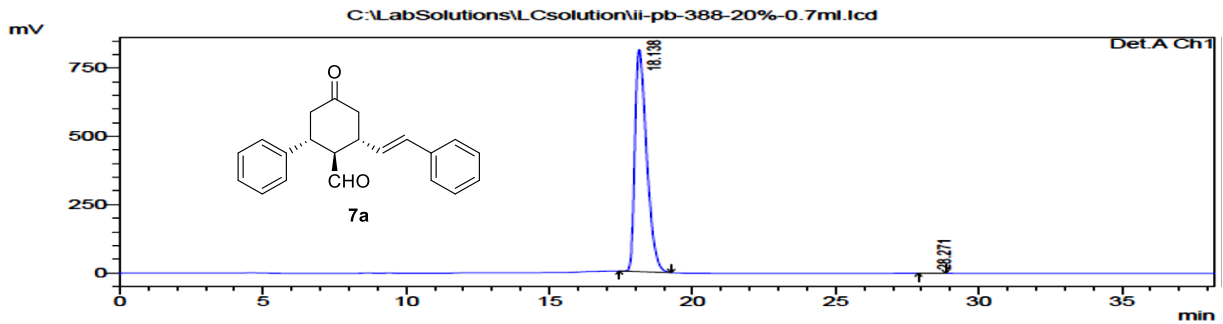

1 Det.A Ch1/254nm

| PeakTable |           |          |        |         |          |
|-----------|-----------|----------|--------|---------|----------|
| Peak#     | Ret. Time | Area     | Height | Area %  | Height % |
| 1         | 18.138    | 23273414 | 813326 | 99.915  | 99.928   |
| 2         | 28.271    | 19850    | 586    | 0.085   | 0.072    |
| Total     |           | 23293264 | 813912 | 100.000 | 100.000  |

==== Shimadzu LCsolution Analysis Report ====

Acquired by ..... Admin  
 Sample Name .....  
 Sample ID .....  
 Vial # .....  
 Injection Volume ..... 1 uL  
 Data File Name ..... 1-RP-1888-B2+C2-PURE.lcd  
 Method File Name ..... ChiralPak ID-20%-1.0 mL-254nm.lcm  
 Batch File Name .....  
 Report File Name ..... Default.lcr  
 Data Acquired ..... 12/11/2019 9:08:44 AM  
 Data Processed ..... 12/11/2019 9:32:59 AM

<Chromatogram>

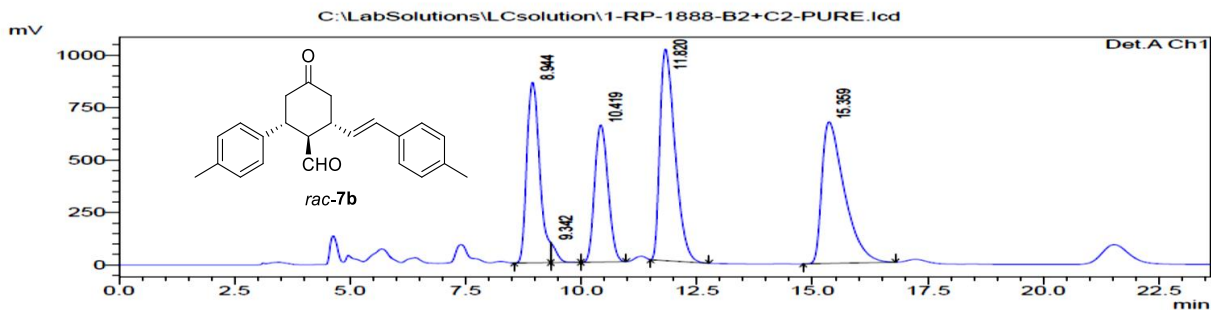

PeakTable

| Peak# | Ret. Time | Area     | Height  | Area %  | Height % |
|-------|-----------|----------|---------|---------|----------|
| 1     | 8.944     | 16755699 | 861002  | 21.881  | 26.146   |
| 2     | 9.342     | 777682   | 94496   | 1.016   | 2.870    |
| 3     | 10.419    | 13176751 | 653432  | 17.207  | 19.843   |
| 4     | 11.820    | 22960535 | 1008808 | 29.984  | 30.635   |
| 5     | 15.359    | 22906112 | 675297  | 29.913  | 20.507   |
| Total |           | 76576778 | 3293034 | 100.000 | 100.000  |

==== Shimadzu LCsolution Analysis Report ====

Acquired by ..... Admin  
 Sample Name .....  
 Sample ID .....  
 Vial # .....  
 Injection Volume ..... 1 uL  
 Data File Name ..... 1-RP-1946-PURE-254.lcd  
 Method File Name ..... ChiralPak ID-20%-1.0 mL-254nm.lcm  
 Batch File Name .....  
 Report File Name ..... Default.lcr  
 Data Acquired ..... 1/9/2020 4:01:12 PM  
 Data Processed ..... 1/9/2020 4:23:44 PM

<Chromatogram>

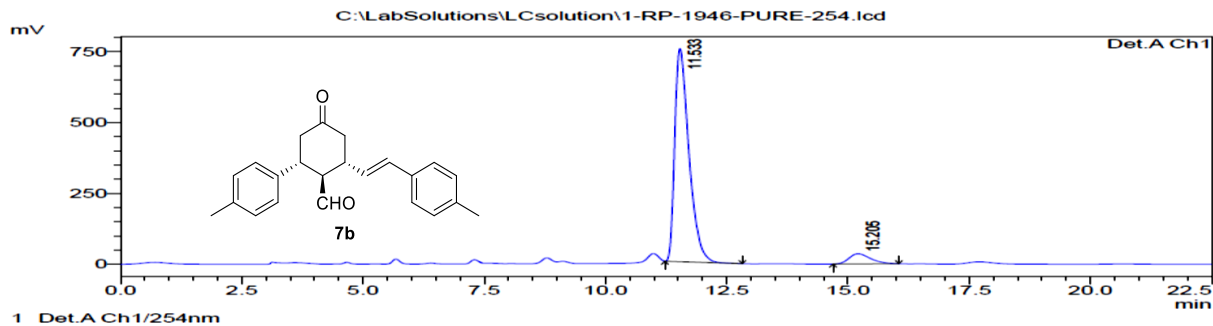

PeakTable

| Peak# | Ret. Time | Area     | Height | Area %  | Height % |
|-------|-----------|----------|--------|---------|----------|
| 1     | 11.533    | 15299655 | 751885 | 93.299  | 95.470   |
| 2     | 15.205    | 1098892  | 35679  | 6.701   | 4.530    |
| Total |           | 16398547 | 787564 | 100.000 | 100.000  |

==== Shimadzu LCsolution Analysis Report ====

Acquired by : Admin  
 Sample Name : C:\LabSolutions\LCsolution\III-PB-424-rac-ID.lcd  
 Sample ID :  
 Vial # :  
 Injection Volume : 1 uL  
 Data File Name : III-PB-424-rac-ID.lcd  
 Method File Name : ChiralPak ID-30.0%-1.0 mL-254nm.lcm  
 Batch File Name :  
 Report File Name : Default.lcr  
 Data Acquired : 9/24/2019 3:50:52 PM  
 Data Processed : 9/24/2019 4:28:24 PM

<Chromatogram>

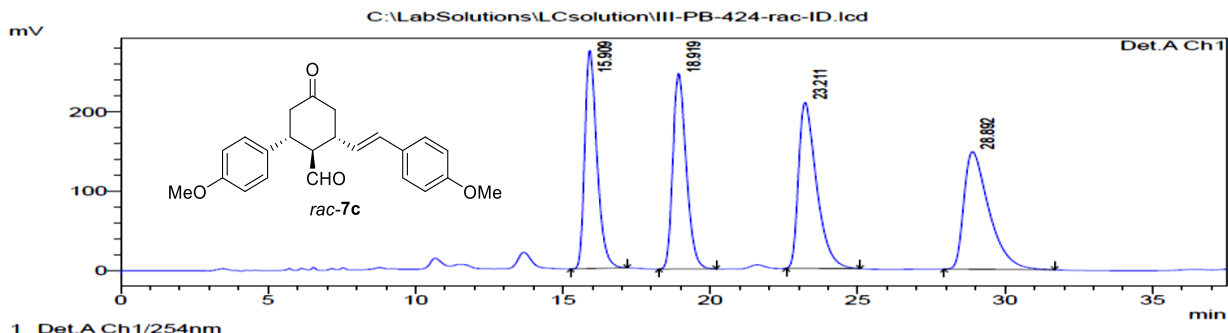

| Peak#        | Ret. Time | Area            | Height        | Area %         | Height %       |
|--------------|-----------|-----------------|---------------|----------------|----------------|
| 1            | 15.909    | 7884233         | 274490        | 23.628         | 31.276         |
| 2            | 18.919    | 7793904         | 246307        | 23.357         | 28.065         |
| 3            | 23.211    | 8912112         | 208986        | 26.709         | 23.812         |
| 4            | 28.892    | 8777809         | 147853        | 26.306         | 16.847         |
| <b>Total</b> |           | <b>33368057</b> | <b>877636</b> | <b>100.000</b> | <b>100.000</b> |

==== Shimadzu LCsolution Analysis Report ====

Acquired by : Admin  
 Sample Name : C:\LabSolutions\LCsolution\IV-PB-709.lcd  
 Sample ID :  
 Vial # :  
 Injection Volume : 1 uL  
 Data File Name : IV-PB-709.lcd  
 Method File Name : ChiralPak ID-30.0%-1.0 mL-254nm.lcm  
 Batch File Name :  
 Report File Name : Default.lcr  
 Data Acquired : 1/21/2020 4:24:23 PM  
 Data Processed : 1/21/2020 5:09:03 PM

<Chromatogram>

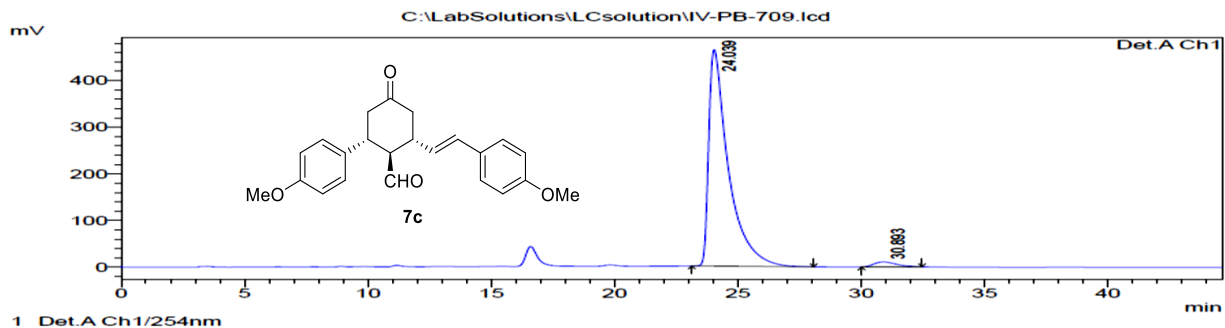

| Peak#        | Ret. Time | Area            | Height        | Area %         | Height %       |
|--------------|-----------|-----------------|---------------|----------------|----------------|
| 1            | 24.039    | 25732722        | 463808        | 97.423         | 97.752         |
| 2            | 30.893    | 680551          | 10668         | 2.577          | 2.248          |
| <b>Total</b> |           | <b>26413273</b> | <b>474476</b> | <b>100.000</b> | <b>100.000</b> |

==== Shimadzu LCsolution Analysis Report ====

Acquired by : Admin  
 Sample Name : C:\LabSolutions\LCsolution\III-PB-422-rac-20%-0.7 ml.lcd  
 Sample ID :  
 Vial # :  
 Injection Volume : 1 uL  
 Data File Name : III-PB-422-rac-20%-0.7 ml.lcd  
 Method File Name : ChiralPak IC-20%-0.7 mL-254nm.lcm  
 Batch File Name :  
 Report File Name : Default.lcr  
 Data Acquired : 9/19/2019 11:19:03 AM  
 Data Processed : 9/19/2019 2:51:29 PM

<Chromatogram>

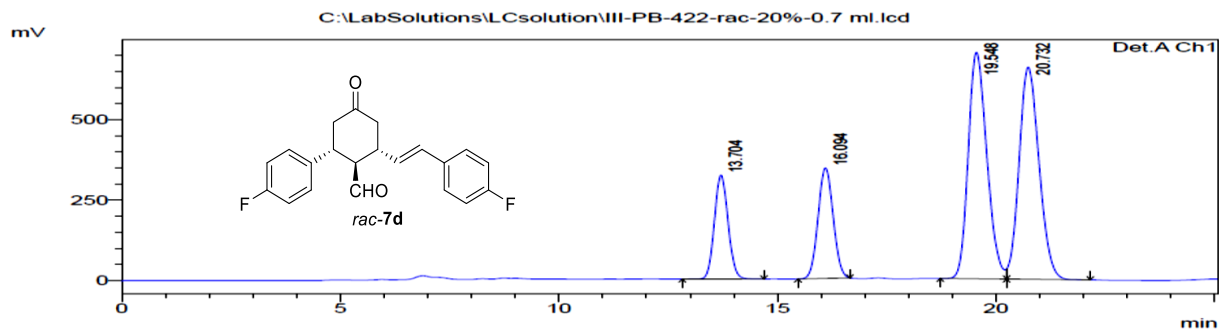

| PeakTable |           |          |         |         |          |
|-----------|-----------|----------|---------|---------|----------|
| Peak#     | Ret. Time | Area     | Height  | Area %  | Height % |
| 1         | 13.704    | 7028226  | 323038  | 12.305  | 15.914   |
| 2         | 16.094    | 8260708  | 343585  | 14.463  | 16.926   |
| 3         | 19.548    | 20887760 | 703822  | 36.572  | 34.672   |
| 4         | 20.732    | 20938141 | 659476  | 36.660  | 32.488   |
| Total     |           | 57114836 | 2029922 | 100.000 | 100.000  |

==== Shimadzu LCsolution Analysis Report ====

Acquired by : Admin  
 Sample Name : C:\LabSolutions\LCsolution\IV-PB-672.lcd  
 Sample ID :  
 Vial # :  
 Injection Volume : 1 uL  
 Data File Name : IV-PB-672.lcd  
 Method File Name : ChiralPak IC-20%-0.7 mL-254nm.lcm  
 Batch File Name :  
 Report File Name : Default.lcr  
 Data Acquired : 1/22/2020 12:13:16 PM  
 Data Processed : 1/22/2020 12:40:40 PM

<Chromatogram>

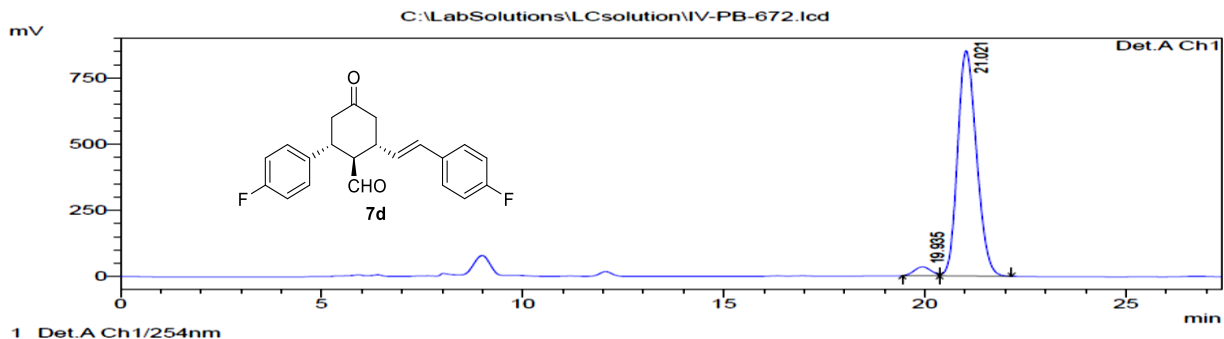

| PeakTable |           |          |        |         |          |
|-----------|-----------|----------|--------|---------|----------|
| Peak#     | Ret. Time | Area     | Height | Area %  | Height % |
| 1         | 19.935    | 981006   | 33824  | 3.397   | 3.820    |
| 2         | 21.021    | 27895733 | 851533 | 96.603  | 96.180   |
| Total     |           | 28876739 | 885357 | 100.000 | 100.000  |

==== Shimadzu LCsolution Analysis Report ====

Acquired by : Admin  
 Sample Name :  
 Sample ID :  
 Vial # :  
 Injection Volume : 1 uL  
 Data File Name : 1-RP-1892-C2-PURE.lcd  
 Method File Name : ChiralPak ID-20.0%-1.0 mL-254nm.lcm  
 Batch File Name :  
 Report File Name : Default.lcr  
 Data Acquired : 12/12/2019 9:23:58 AM  
 Data Processed : 12/12/2019 9:47:45 AM

<Chromatogram>

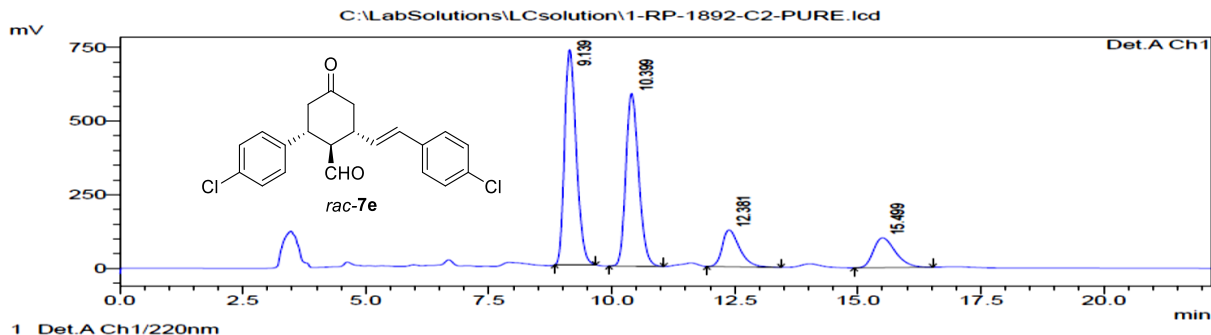

PeakTable

| Peak# | Ret. Time | Area     | Height  | Area %  | Height % |
|-------|-----------|----------|---------|---------|----------|
| 1     | 9.139     | 12109035 | 730845  | 41.798  | 47.356   |
| 2     | 10.399    | 10669290 | 586303  | 36.828  | 37.990   |
| 3     | 12.381    | 3046998  | 125057  | 10.518  | 8.103    |
| 4     | 15.499    | 3145254  | 101109  | 10.857  | 6.551    |
| Total |           | 28970577 | 1543314 | 100.000 | 100.000  |

==== Shimadzu LCsolution Analysis Report ====

Acquired by : Admin  
 Sample Name :  
 Sample ID :  
 Vial # :  
 Injection Volume : 1 uL  
 Data File Name : IV-PB-719-1.lcd  
 Method File Name : ChiralPak ID-20.0%-1.0 mL-254nm.lcm  
 Batch File Name :  
 Report File Name : Default.lcr  
 Data Acquired : 2/1/2020 11:41:53 AM  
 Data Processed : 2/1/2020 12:11:24 PM

<Chromatogram>

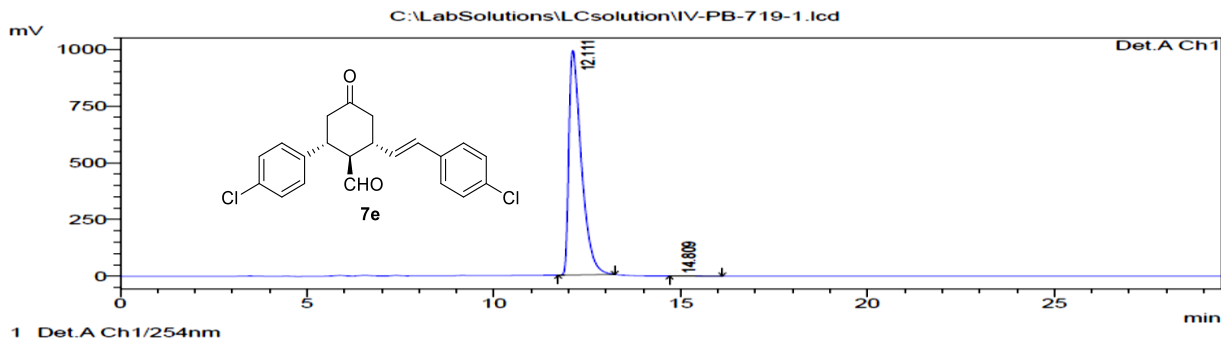

PeakTable

| Peak# | Ret. Time | Area     | Height | Area %  | Height % |
|-------|-----------|----------|--------|---------|----------|
| 1     | 12.111    | 22924937 | 989036 | 99.974  | 99.990   |
| 2     | 14.809    | 6063     | 96     | 0.026   | 0.010    |
| Total |           | 22930999 | 989132 | 100.000 | 100.000  |

==== Shimadzu LCsolution Analysis Report ====

Acquired by : Admin  
 Sample Name : C:\LabSolutions\LCsolution\1-RP-1893-C2-PURE.lcd  
 Sample ID :  
 Vail # :  
 Injection Volume : 1 uL  
 Data File Name : 1-RP-1893-C2-PURE.lcd  
 Method File Name : ChiralPak ID-20.0%-1.0 mL-254nm.lcm  
 Batch File Name :  
 Report File Name : Default.lcr  
 Data Acquired : 12/12/2019 9:54:41 AM  
 Data Processed : 12/12/2019 11:04:23 AM

<Chromatogram>

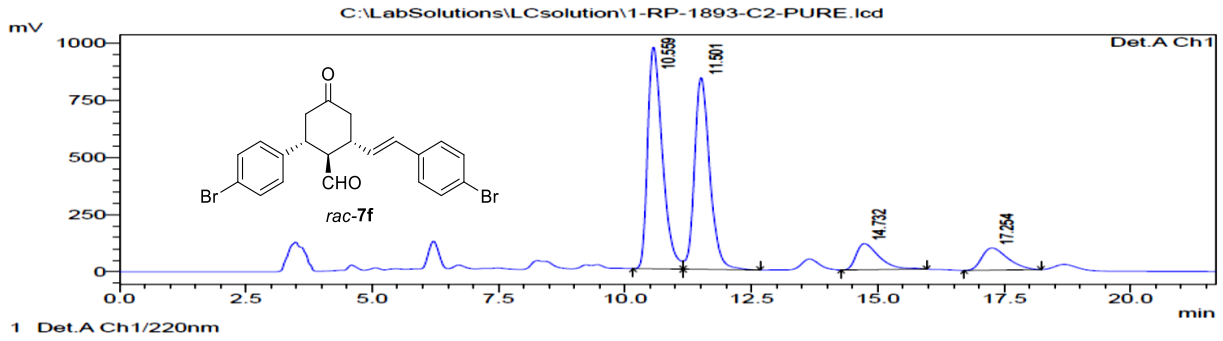

PeakTable

| Peak# | Ret. Time | Area     | Height  | Area %  | Height % |
|-------|-----------|----------|---------|---------|----------|
| 1     | 10.559    | 19658119 | 968772  | 44.393  | 48.010   |
| 2     | 11.501    | 17596876 | 838021  | 39.738  | 41.530   |
| 3     | 14.732    | 3600297  | 114138  | 8.130   | 5.656    |
| 4     | 17.254    | 3427001  | 96937   | 7.739   | 4.804    |
| Total |           | 44282292 | 2017868 | 100.000 | 100.000  |

==== Shimadzu LCsolution Analysis Report ====

Acquired by : Admin  
 Sample Name : C:\LabSolutions\LCsolution\IV-PB-721.lcd  
 Sample ID :  
 Vail # :  
 Injection Volume : 1 uL  
 Data File Name : IV-PB-721.lcd  
 Method File Name : ChiralPak ID-20.0%-1.0 mL-254nm.lcm  
 Batch File Name :  
 Report File Name : Default.lcr  
 Data Acquired : 2/1/2020 11:02:38 AM  
 Data Processed : 2/1/2020 11:27:03 AM

<Chromatogram>

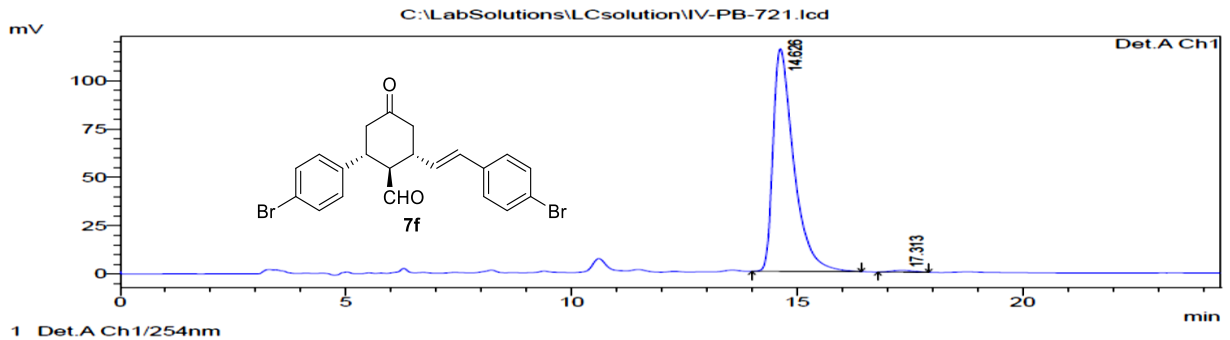

PeakTable

| Peak# | Ret. Time | Area    | Height | Area %  | Height % |
|-------|-----------|---------|--------|---------|----------|
| 1     | 14.626    | 3683302 | 115151 | 99.150  | 99.187   |
| 2     | 17.313    | 31571   | 944    | 0.850   | 0.813    |
| Total |           | 3714873 | 116095 | 100.000 | 100.000  |

==== Shimadzu LCsolution Analysis Report ====

Acquired by : Admin  
 Sample Name : C:\LabSolutions\LCsolution\1-RP-1926-PURE-RM-1.lcd  
 Sample ID :  
 Vial # :  
 Injection Volume : 1 uL  
 Data File Name : 1-RP-1926-PURE-RM-1.lcd  
 Method File Name : ChiralPak ID-30.0%-1.0 mL-254nm.lcm  
 Batch File Name :  
 Report File Name : Default.lcr  
 Data Acquired : 12/31/2019 11:19:30 AM  
 Data Processed : 12/31/2019 12:19:35 PM

<Chromatogram>

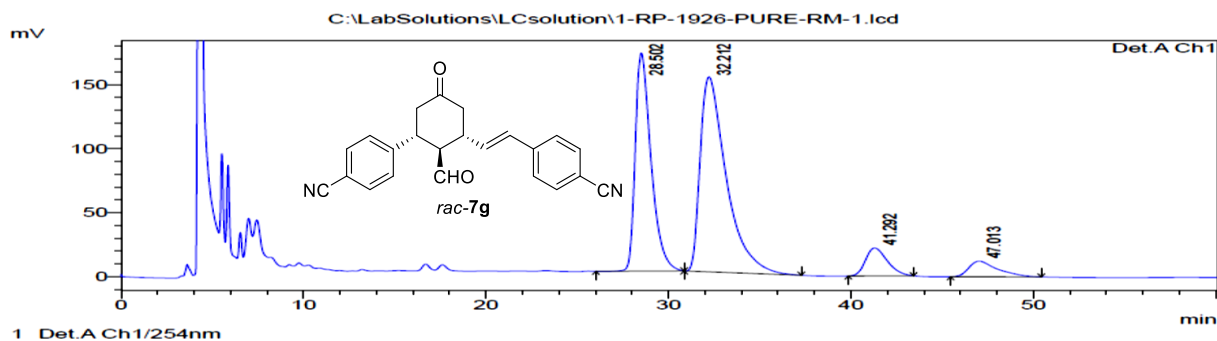

Detector A Ch1 254nm

| Peak#        | Ret. Time | Area            | Height        | Area %         | Height %       |
|--------------|-----------|-----------------|---------------|----------------|----------------|
| 1            | 28.502    | 10252448        | 170267        | 35.883         | 47.733         |
| 2            | 32.212    | 15154639        | 152271        | 53.040         | 42.688         |
| 3            | 41.292    | 1812763         | 21857         | 6.345          | 6.128          |
| 4            | 47.013    | 1352257         | 12310         | 4.733          | 3.451          |
| <b>Total</b> |           | <b>28572107</b> | <b>356705</b> | <b>100.000</b> | <b>100.000</b> |

==== Shimadzu LCsolution Analysis Report ====

Acquired by : Admin  
 Sample Name : C:\LabSolutions\LCsolution\1-RP-1956-PURE-1.lcd  
 Sample ID :  
 Vial # :  
 Injection Volume : 1 uL  
 Data File Name : 1-RP-1956-PURE-1.lcd  
 Method File Name : ChiralPak ID-30.0%-1.0 mL-254nm.lcm  
 Batch File Name :  
 Report File Name : Default.lcr  
 Data Acquired : 1/15/2020 9:25:40 AM  
 Data Processed : 1/15/2020 10:25:56 AM

<Chromatogram>

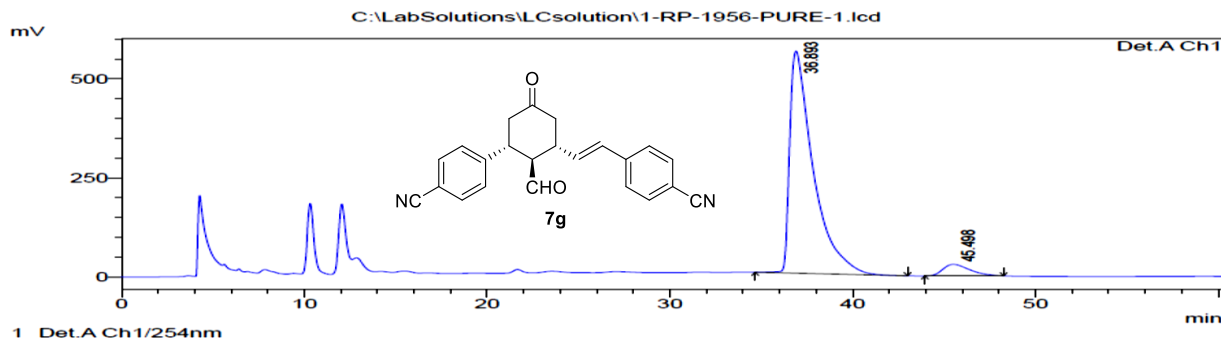

Detector A Ch1 254nm

| Peak#        | Ret. Time | Area            | Height        | Area %         | Height %       |
|--------------|-----------|-----------------|---------------|----------------|----------------|
| 1            | 36.893    | 50149069        | 560432        | 94.410         | 95.073         |
| 2            | 45.498    | 2969580         | 29044         | 5.590          | 4.927          |
| <b>Total</b> |           | <b>53118649</b> | <b>589476</b> | <b>100.000</b> | <b>100.000</b> |



==== Shimadzu LCsolution Analysis Report ====

Acquired by : Admin  
 Sample Name : C:\LabSolutions\LCsolution\IV-PB-665-UP-RAC-ID.lcd  
 Sample ID :  
 Vial # :  
 Injection Volume : 1 uL  
 Data File Name : IV-PB-665-UP-RAC-ID.lcd  
 Method File Name : ChiralPak ID-30.0%-1.0 mL-254nm.lcm  
 Batch File Name :  
 Report File Name : Default.lcr  
 Data Acquired : 1/2/2020 1:43:47 PM  
 Data Processed : 1/2/2020 3:19:29 PM

<Chromatogram>

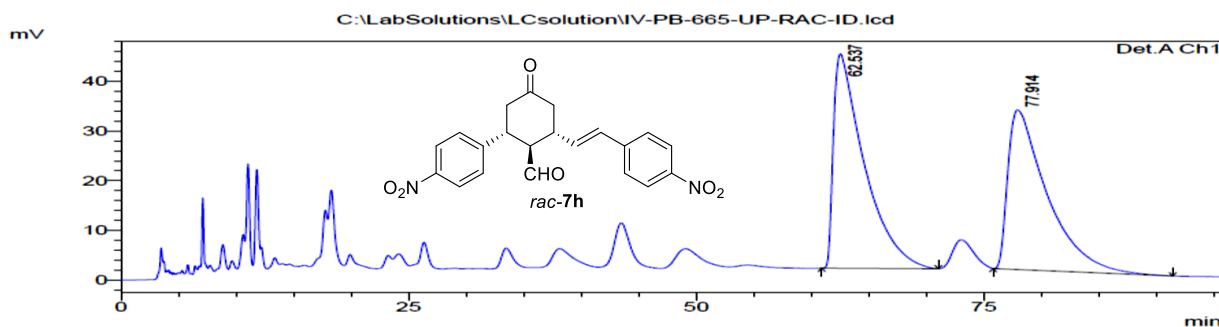

PeakTable

| Peak# | Ret. Time | Area     | Height | Area %  | Height % |
|-------|-----------|----------|--------|---------|----------|
| 1     | 62.537    | 8022489  | 43177  | 51.257  | 57.317   |
| 2     | 77.914    | 7628954  | 32153  | 48.743  | 42.683   |
| Total |           | 15651443 | 75330  | 100.000 | 100.000  |

==== Shimadzu LCsolution Analysis Report ====

Acquired by : Admin  
 Sample Name : C:\LabSolutions\LCsolution\IV-PB-671.lcd  
 Sample ID :  
 Vial # :  
 Injection Volume : 1 uL  
 Data File Name : IV-PB-671.lcd  
 Method File Name : ChiralPak ID-30.0%-1.0 mL-254nm.lcm  
 Batch File Name :  
 Report File Name : Default.lcr  
 Data Acquired : 1/6/2020 1:00:25 PM  
 Data Processed : 1/6/2020 2:38:54 PM

<Chromatogram>

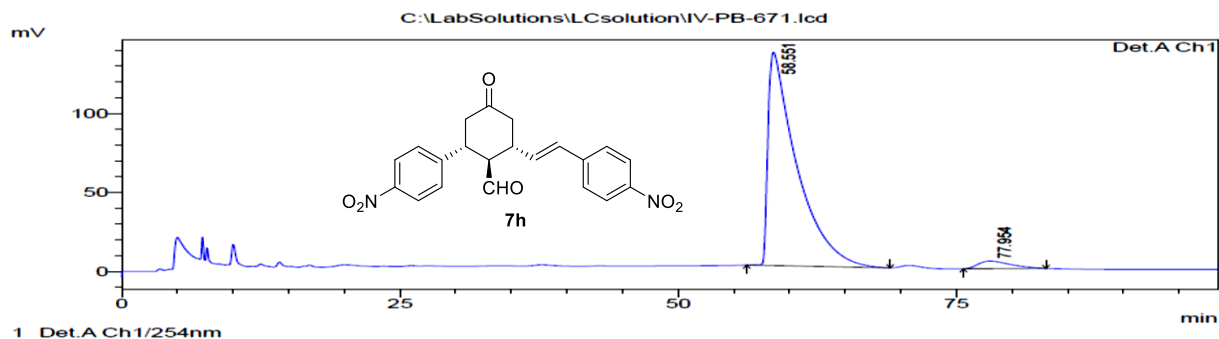

PeakTable

| Peak# | Ret. Time | Area     | Height | Area %  | Height % |
|-------|-----------|----------|--------|---------|----------|
| 1     | 58.551    | 24273169 | 135092 | 96.131  | 96.568   |
| 2     | 77.954    | 976919   | 4801   | 3.869   | 3.432    |
| Total |           | 25250088 | 139894 | 100.000 | 100.000  |



==== Shimadzu LCsolution Analysis Report ====

Acquired by : Admin  
 Sample Name : C:\LabSolutions\LCsolution\MB-2-OMe-RAC-15%-0.7-IC-1.lcd  
 Sample ID :  
 Vial # :  
 Injection Volume : 1 uL  
 Data File Name : MB-2-OMe-RAC-15%-0.7-IC-1.lcd  
 Method File Name : ChiralPak IC-15.0%-0.70 mL-254nm.lcm  
 Batch File Name :  
 Report File Name : Default.lcr  
 Data Acquired : 10/2/2019 3:10:12 PM  
 Data Processed : 10/2/2019 4:07:26 PM

<Chromatogram>

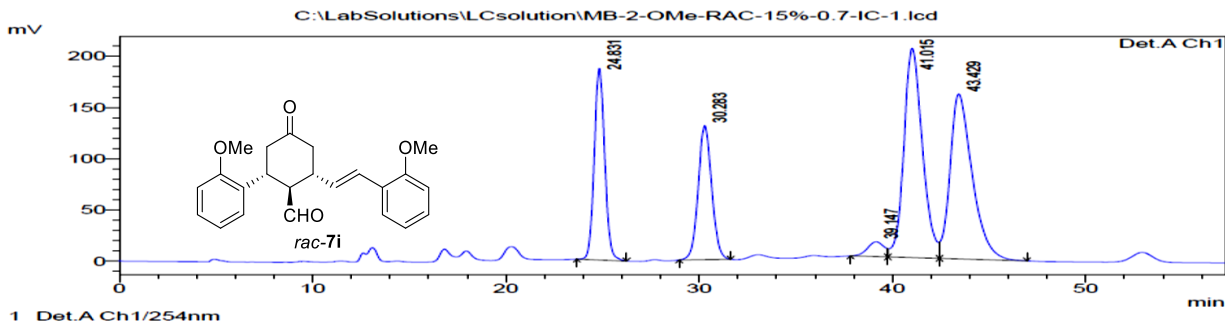

| Peak# | Ret. Time | Area     | Height | Area %  | Height % |
|-------|-----------|----------|--------|---------|----------|
| 1     | 24.831    | 7067251  | 187150 | 17.318  | 26.817   |
| 2     | 30.283    | 6358099  | 130867 | 15.580  | 18.752   |
| 3     | 39.147    | 870193   | 14513  | 2.132   | 2.080    |
| 4     | 41.015    | 13657376 | 204365 | 33.466  | 29.284   |
| 5     | 43.429    | 12856505 | 160972 | 31.504  | 23.066   |
| Total |           | 40809425 | 697867 | 100.000 | 100.000  |

==== Shimadzu LCsolution Analysis Report ====

Acquired by : Admin  
 Sample Name : C:\LabSolutions\LCsolution\IV-PB-683-IC-15%.lcd  
 Sample ID :  
 Vial # :  
 Injection Volume : 1 uL  
 Data File Name : IV-PB-683-IC-15%.lcd  
 Method File Name : ChiralPak IC-15.0%-0.70 mL-254nm.lcm  
 Batch File Name :  
 Report File Name : Default.lcr  
 Data Acquired : 1/17/2020 1:10:25 PM  
 Data Processed : 1/17/2020 2:10:33 PM

<Chromatogram>

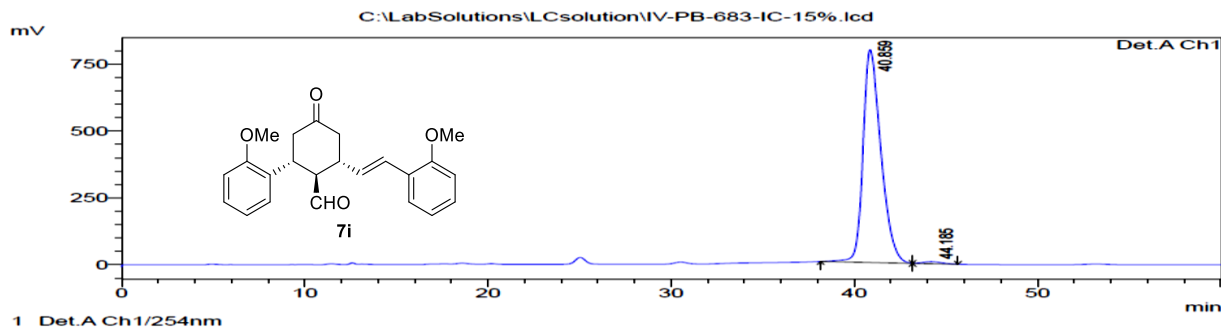

| Peak# | Ret. Time | Area     | Height | Area %  | Height % |
|-------|-----------|----------|--------|---------|----------|
| 1     | 40.859    | 53909270 | 795174 | 98.949  | 98.993   |
| 2     | 44.185    | 572835   | 8093   | 1.051   | 1.007    |
| Total |           | 54482105 | 803266 | 100.000 | 100.000  |

==== Shimadzu LCsolution Analysis Report ====

Acquired by : Admin  
 Sample Name : C:\LabSolutions\LCsolution\IV-PB-653-3-0MeRAC-IB-10%.lcd  
 Sample ID :  
 Vial # :  
 Injection Volume : 1 uL  
 Data File Name : IV-PB-653-3-0MeRAC-IB-10%.lcd  
 Method File Name : ChiralPak IB-10%-1.0 mL-254nm.lcm  
 Batch File Name :  
 Report File Name : Default.lcr  
 Data Acquired : 1/14/2020 10:42:04 AM  
 Data Processed : 1/14/2020 12:28:46 PM

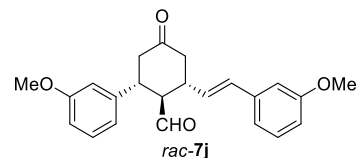

<Chromatogram>

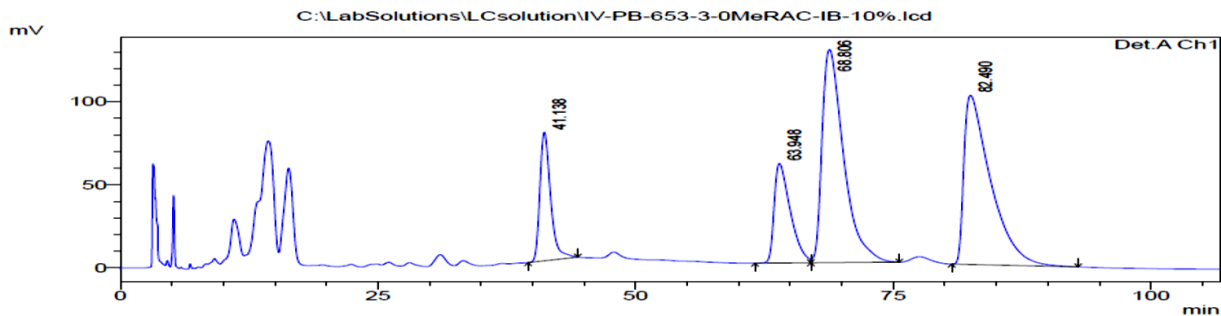

1 Det.A Ch1/254nm

PeakTable

| Peak# | Ret. Time | Area     | Height | Area %  | Height % |
|-------|-----------|----------|--------|---------|----------|
| 1     | 41.138    | 5627367  | 77458  | 11.417  | 21.063   |
| 2     | 63.948    | 6536745  | 59980  | 13.262  | 16.311   |
| 3     | 68.806    | 18747203 | 128387 | 38.034  | 34.913   |
| 4     | 82.490    | 18379041 | 101914 | 37.287  | 27.714   |
| Total |           | 49290356 | 367739 | 100.000 | 100.000  |

==== Shimadzu LCsolution Analysis Report ====

Acquired by : Admin  
 Sample Name : C:\LabSolutions\LCsolution\IV-PB-667-3-0Me-C6QDT.lcd  
 Sample ID :  
 Vial # :  
 Injection Volume : 1 uL  
 Data File Name : IV-PB-667-3-0Me-C6QDT.lcd  
 Method File Name : ChiralPak IB-10%-1.0 mL-254nm.lcm  
 Batch File Name :  
 Report File Name : Default.lcr  
 Data Acquired : 1/14/2020 2:18:30 PM  
 Data Processed : 1/14/2020 4:06:17 PM

<Chromatogram>

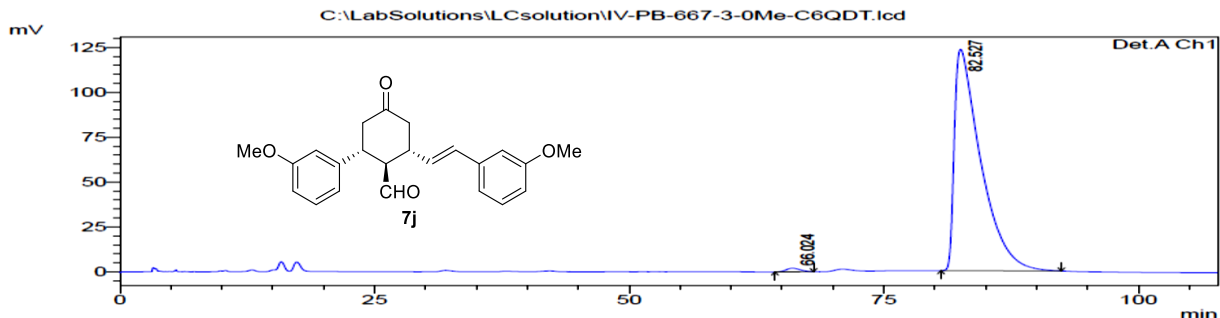

1 Det.A Ch1/254nm

PeakTable

| Peak# | Ret. Time | Area     | Height | Area %  | Height % |
|-------|-----------|----------|--------|---------|----------|
| 1     | 66.024    | 194239   | 2033   | 0.865   | 1.621    |
| 2     | 82.527    | 22268641 | 123349 | 99.135  | 98.379   |
| Total |           | 22462881 | 125382 | 100.000 | 100.000  |

==== Shimadzu LCsolution Analysis Report ====

Acquired by : Admin  
 Sample Name : C:\LabSolutions\LCsolution\III-PB-439-RAC-IB.lcd  
 Sample ID :  
 Vial # :  
 Injection Volume : 1 uL  
 Data File Name : III-PB-439-RAC-IB.lcd  
 Method File Name : ChiralPak IB-40%-1 mL-254nm.lcm  
 Batch File Name :  
 Report File Name : Default.lcr  
 Data Acquired : 10/4/2019 2:39:32 PM  
 Data Processed : 10/4/2019 3:37:31 PM

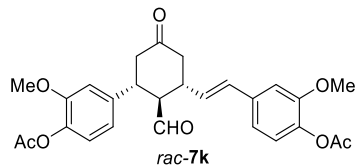

<Chromatogram>

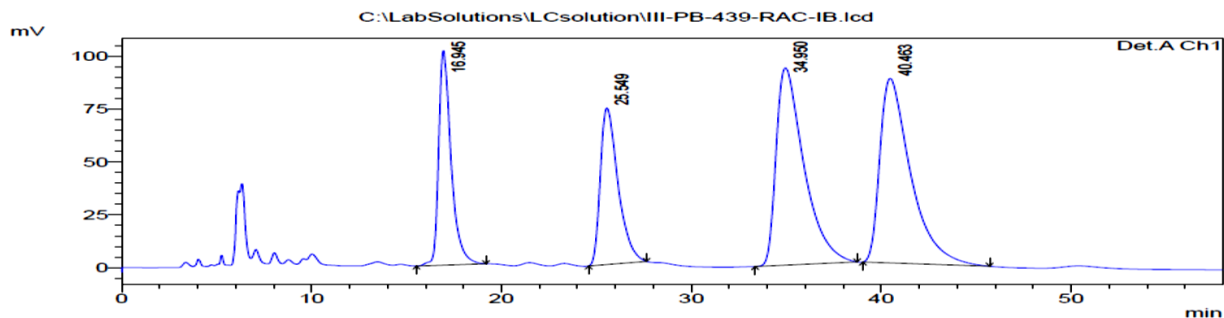

PeakTable

| Peak# | Ret. Time | Area     | Height | Area %  | Height % |
|-------|-----------|----------|--------|---------|----------|
| 1     | 16.945    | 4642998  | 101609 | 16.088  | 28.491   |
| 2     | 25.549    | 4821022  | 74170  | 16.705  | 20.797   |
| 3     | 34.950    | 9529607  | 93441  | 33.020  | 26.201   |
| 4     | 40.463    | 9866874  | 87416  | 34.188  | 24.511   |
| Total |           | 28860501 | 356636 | 100.000 | 100.000  |

==== Shimadzu LCsolution Analysis Report ====

Acquired by : Admin  
 Sample Name : C:\LabSolutions\LCsolution\IV-PB-694.lcd  
 Sample ID :  
 Vial # :  
 Injection Volume : 1 uL  
 Data File Name : IV-PB-694.lcd  
 Method File Name : ChiralPak IB-40%-1 mL-254nm.lcm  
 Batch File Name :  
 Report File Name : Default.lcr  
 Data Acquired : 1/16/2020 3:10:12 PM  
 Data Processed : 1/16/2020 4:15:26 PM

<Chromatogram>

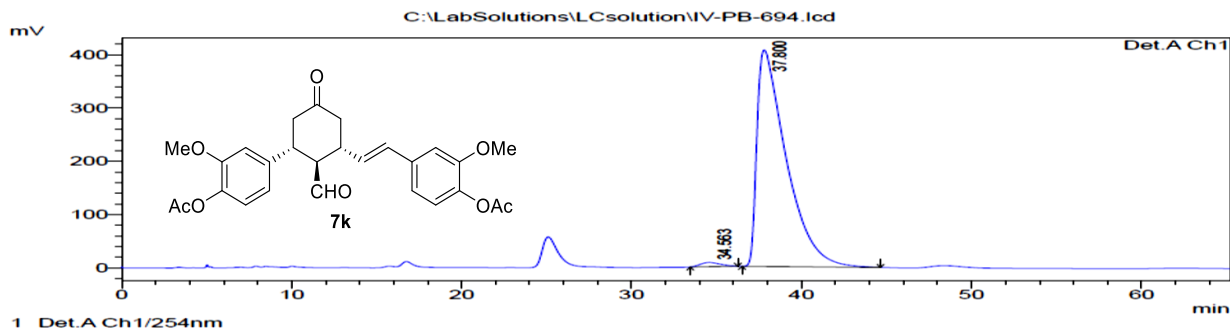

PeakTable

| Peak# | Ret. Time | Area     | Height | Area %  | Height % |
|-------|-----------|----------|--------|---------|----------|
| 1     | 34.563    | 657616   | 7942   | 1.329   | 1.916    |
| 2     | 37.800    | 48835109 | 406494 | 98.671  | 98.084   |
| Total |           | 49492725 | 414436 | 100.000 | 100.000  |

==== Shimadzu LCsolution Analysis Report ====

Acquired by : Admin  
 Sample Name : I-NS-143-IC  
 Sample ID :  
 Vial # :  
 Injection Volume : 2 uL  
 Data File Name : I-NS-143 RACEMIC2.Icd  
 Method File Name : ChiralPak IC-20%-1.0 mL-220nm.Icm  
 Batch File Name :  
 Report File Name : Default.Icr  
 Data Acquired : 4/3/2021 4:16:50 PM  
 Data Processed : 4/3/2021 5:16:54 PM

<Chromatogram>

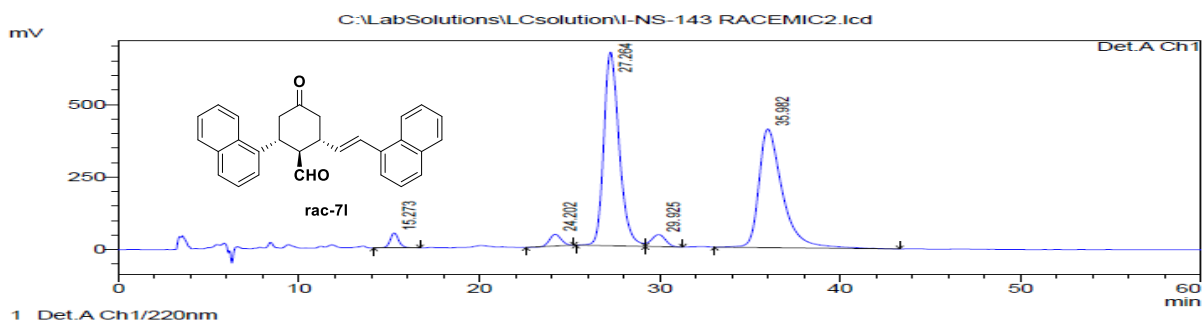

PeakTable

| Peak# | Ret. Time | Area     | Height  | Area %  | Height % |
|-------|-----------|----------|---------|---------|----------|
| 1     | 15.273    | 1702491  | 51634   | 2.065   | 4.265    |
| 2     | 24.202    | 1755266  | 40448   | 2.129   | 3.341    |
| 3     | 27.264    | 39653049 | 667323  | 48.091  | 55.127   |
| 4     | 29.925    | 2278022  | 41951   | 2.763   | 3.466    |
| 5     | 35.982    | 37066172 | 409170  | 44.953  | 33.801   |
| Total |           | 82455000 | 1210526 | 100.000 | 100.000  |

==== Shimadzu LCsolution Analysis Report ====

Acquired by : Admin  
 Sample Name : I-NS-132  
 Sample ID :  
 Vial # :  
 Injection Volume : 3 uL  
 Data File Name : I-NS-133.Icd  
 Method File Name : ChiralPak IC-20%-1.0 mL-220nm.Icm  
 Batch File Name :  
 Report File Name : Default.Icr  
 Data Acquired : 3/31/2021 6:04:56 PM  
 Data Processed : 4/1/2021 2:43:30 PM

<Chromatogram>

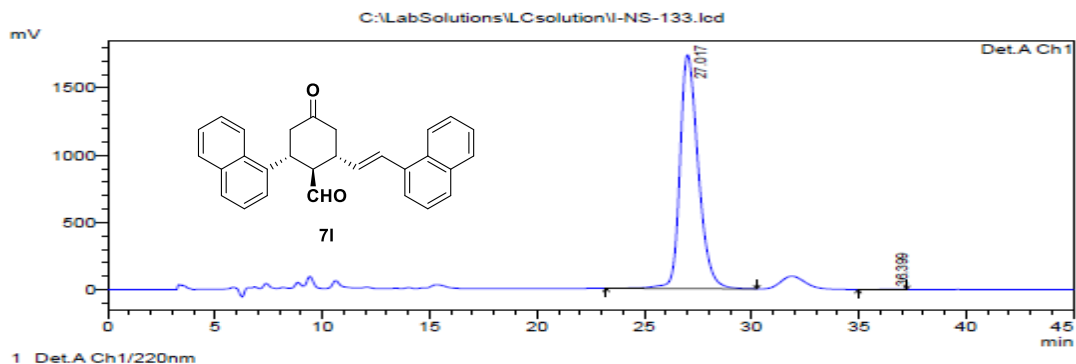

PeakTable

| Peak# | Ret. Time | Area      | Height  | Area %  | Height % |
|-------|-----------|-----------|---------|---------|----------|
| 1     | 27.017    | 103437809 | 1739115 | 99.939  | 99.934   |
| 2     | 36.399    | 63166     | 1146    | 0.061   | 0.066    |
| Total |           | 103500974 | 1740260 | 100.000 | 100.000  |

==== Shimadzu LCsolution Analysis Report ====

Acquired by : Admin  
 Sample Name : C:\LabSolutions\LCsolution\1-RP-1985-PURE-RM-1.lcd  
 Sample ID :  
 Vial # :  
 Injection Volume : 1 uL  
 Data File Name : 1-RP-1985-PURE-RM-1.lcd  
 Method File Name : ChiralPak ID-20.0%-1.0 mL-254nm.lcm  
 Batch File Name :  
 Report File Name : Default.lcr  
 Data Acquired : 1/23/2020 1:04:46 PM  
 Data Processed : 1/28/2020 2:22:16 PM

<Chromatogram>

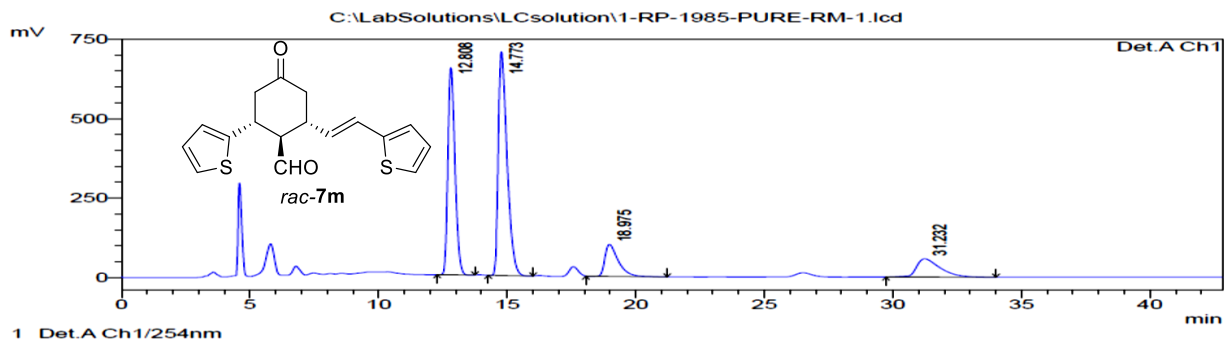

Detector A Ch1 254nm

| Peak# | Ret. Time | Area     | Height  | Area %  | Height % |
|-------|-----------|----------|---------|---------|----------|
| 1     | 12.808    | 12465893 | 651609  | 34.159  | 43.028   |
| 2     | 14.773    | 16745782 | 704521  | 45.887  | 46.522   |
| 3     | 18.975    | 3586929  | 100665  | 9.829   | 6.647    |
| 4     | 31.232    | 3695106  | 57594   | 10.125  | 3.803    |
| Total |           | 36493710 | 1514389 | 100.000 | 100.000  |

==== Shimadzu LCsolution Analysis Report ====

Acquired by : Admin  
 Sample Name : C:\LabSolutions\LCsolution\1-RP-1988-PURE.lcd  
 Sample ID :  
 Vial # :  
 Injection Volume : 1 uL  
 Data File Name : 1-RP-1988-PURE.lcd  
 Method File Name : ChiralPak ID-20.0%-1.0 mL-254nm.lcm  
 Batch File Name :  
 Report File Name : Default.lcr  
 Data Acquired : 1/28/2020 9:53:56 AM  
 Data Processed : 1/28/2020 2:23:14 PM

<Chromatogram>

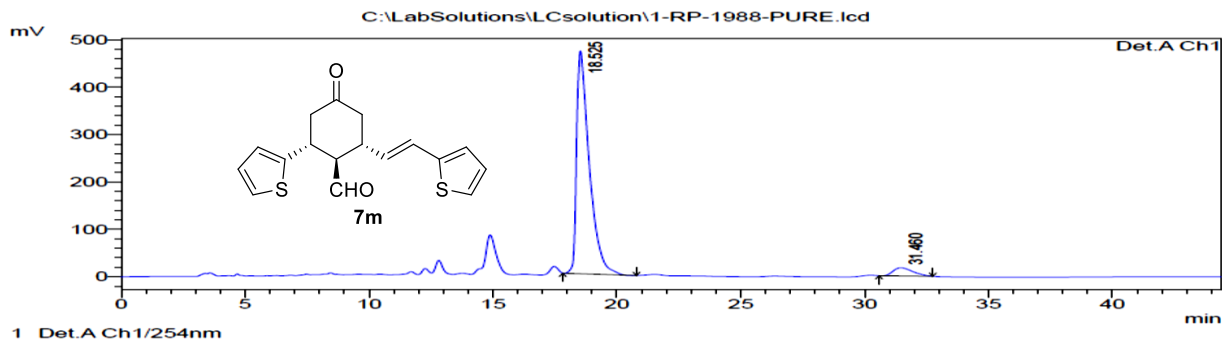

Detector A Ch1 254nm

| Peak# | Ret. Time | Area     | Height | Area %  | Height % |
|-------|-----------|----------|--------|---------|----------|
| 1     | 18.525    | 16783731 | 470250 | 94.643  | 96.442   |
| 2     | 31.460    | 949926   | 17349  | 5.357   | 3.558    |
| Total |           | 17733657 | 487599 | 100.000 | 100.000  |

==== Shimadzu LCsolution Analysis Report ====

Acquired by : Admin  
 Sample Name : C:\LabSolutions\LCsolution\IV-PB-705-RAC-ID.lcd  
 Sample ID :  
 Vail # :  
 Injection Volume : 1 uL  
 Data File Name : IV-PB-705-RAC-ID.lcd  
 Method File Name : ChiralPak ID-15.0%-1.0 mL-254nm.lcm  
 Batch File Name :  
 Report File Name : Default.lcr  
 Data Acquired : 1/21/2020 1:00:56 PM  
 Data Processed : 1/21/2020 2:06:41 PM

<Chromatogram>

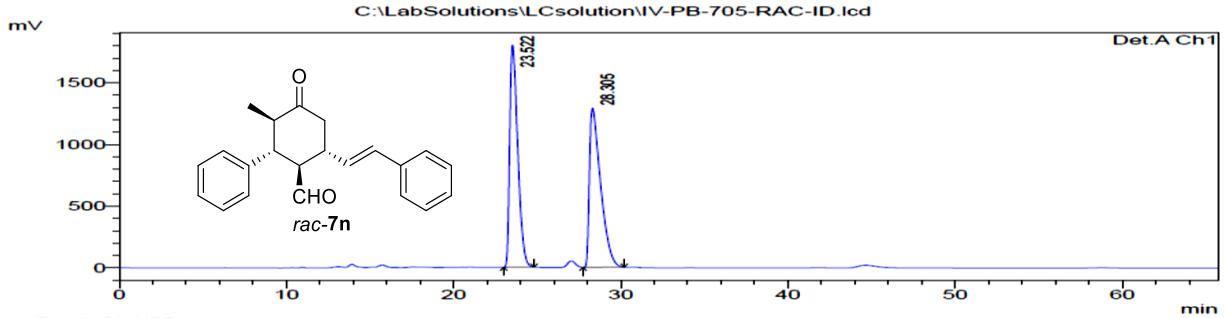

| Detector A Ch1 254nm |           |                  |                |                |                |
|----------------------|-----------|------------------|----------------|----------------|----------------|
| Peak#                | Ret. Time | Area             | Height         | Area %         | Height %       |
| 1                    | 23.522    | 60313784         | 1802268        | 50.065         | 58.253         |
| 2                    | 28.305    | 60156885         | 1291588        | 49.935         | 41.747         |
| <b>Total</b>         |           | <b>120470669</b> | <b>3093857</b> | <b>100.000</b> | <b>100.000</b> |

==== Shimadzu LCsolution Analysis Report ====

Acquired by : Admin  
 Sample Name : C:\LabSolutions\LCsolution\IV-PB-710-2.lcd  
 Sample ID :  
 Vail # :  
 Injection Volume : 1 uL  
 Data File Name : IV-PB-710-2.lcd  
 Method File Name : ChiralPak ID-15.0%-1.0 mL-254nm.lcm  
 Batch File Name :  
 Report File Name : Default.lcr  
 Data Acquired : 1/27/2020 4:46:31 PM  
 Data Processed : 1/27/2020 5:49:46 PM

<Chromatogram>

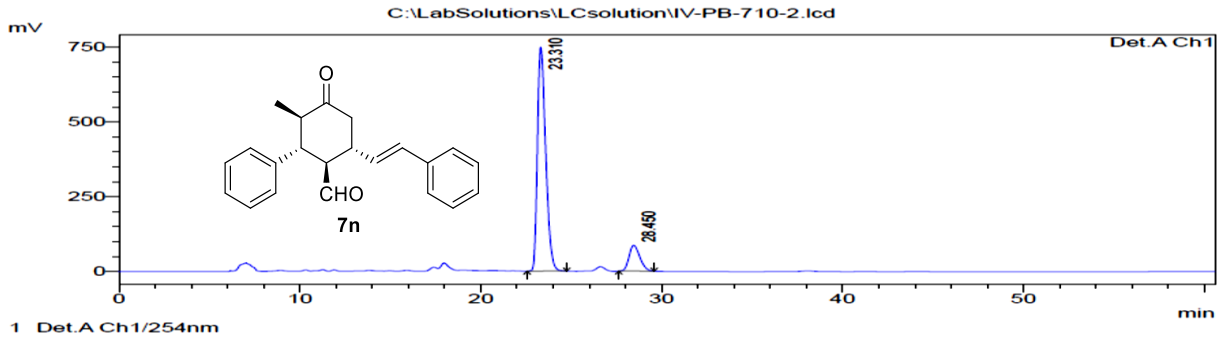

| Detector A Ch1 254nm |           |                 |               |                |                |
|----------------------|-----------|-----------------|---------------|----------------|----------------|
| Peak#                | Ret. Time | Area            | Height        | Area %         | Height %       |
| 1                    | 23.310    | 23793541        | 748193        | 86.876         | 89.659         |
| 2                    | 28.450    | 3594504         | 86293         | 13.124         | 10.341         |
| <b>Total</b>         |           | <b>27388045</b> | <b>834485</b> | <b>100.000</b> | <b>100.000</b> |

==== Shimadzu LCsolution Analysis Report ====

Acquired by : Admin  
 Sample Name : C:\LabSolutions\LCsolution\I-PB-189-RAC-20%-0.7ML.lcd  
 Sample ID :  
 Vial # :  
 Injection Volume : 1 uL  
 Data File Name : I-PB-189-RAC-20%-0.7ML.lcd  
 Method File Name : ChiralPak ID-20.0%-0.7 mL-254nm.lcm  
 Batch File Name :  
 Report File Name : Default.lcr  
 Data Acquired : 8/16/2019 1:16:42 PM  
 Data Processed : 9/5/2019 2:05:31 PM

<Chromatogram>

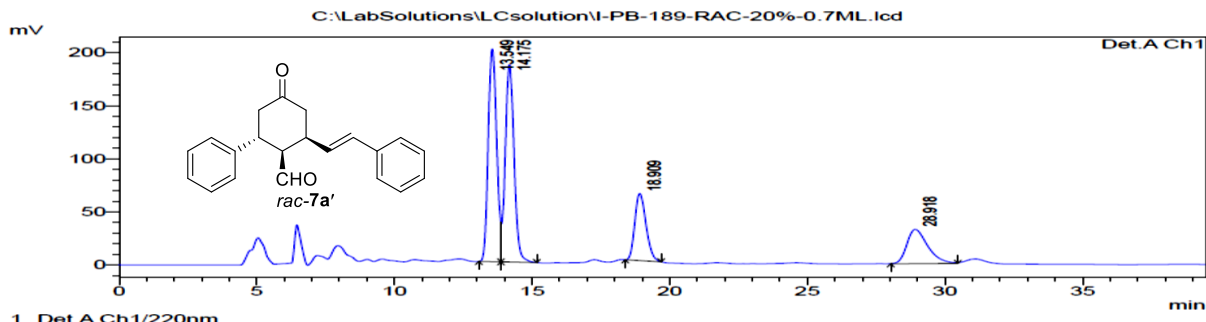

PeakTable

| Peak# | Ret. Time | Area     | Height | Area %  | Height % |
|-------|-----------|----------|--------|---------|----------|
| 1     | 13.549    | 4270538  | 200394 | 35.738  | 41.599   |
| 2     | 14.175    | 4178528  | 185846 | 34.968  | 38.579   |
| 3     | 18.909    | 1794547  | 63219  | 15.018  | 13.123   |
| 4     | 28.918    | 1706086  | 32272  | 14.277  | 6.699    |
| Total |           | 11949699 | 481730 | 100.000 | 100.000  |

==== Shimadzu LCsolution Analysis Report ====

Acquired by : Admin  
 Sample Name : C:\LabSolutions\LCsolution\I-PB-191-20%-0.7ML.lcd  
 Sample ID :  
 Vial # :  
 Injection Volume : 1 uL  
 Data File Name : I-PB-191-20%-0.7ML.lcd  
 Method File Name : ChiralPak ID-20.0%-0.7 mL-254nm.lcm  
 Batch File Name :  
 Report File Name : Default.lcr  
 Data Acquired : 8/16/2019 3:14:57 PM  
 Data Processed : 8/16/2019 3:56:41 PM

<Chromatogram>

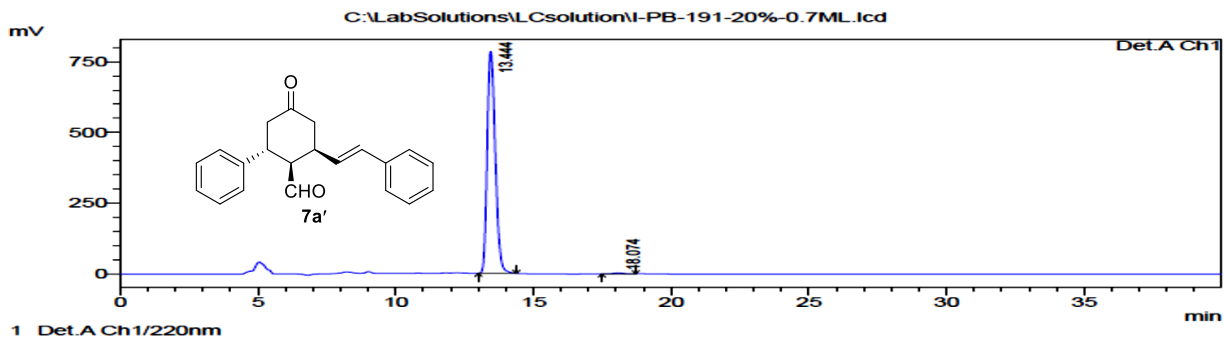

PeakTable

| Peak# | Ret. Time | Area     | Height | Area %  | Height % |
|-------|-----------|----------|--------|---------|----------|
| 1     | 13.444    | 16028874 | 783281 | 99.589  | 99.559   |
| 2     | 18.074    | 66167    | 3468   | 0.411   | 0.441    |
| Total |           | 16095041 | 786749 | 100.000 | 100.000  |

==== Shimadzu LCsolution Analysis Report ====

Acquired by : Admin  
 Sample Name : C:\LabSolutions\LCsolution\1-RP-1888-B2+C2-PURE.lcd  
 Sample ID :  
 Vial # :  
 Injection Volume : 1 uL  
 Data File Name : 1-RP-1888-B2+C2-PURE.lcd  
 Method File Name : ChiralPak ID-20%-1.0 mL-254nm.lcm  
 Batch File Name :  
 Report File Name : Default.lcr  
 Data Acquired : 12/11/2019 9:08:44 AM  
 Data Processed : 12/11/2019 9:32:59 AM

<Chromatogram>

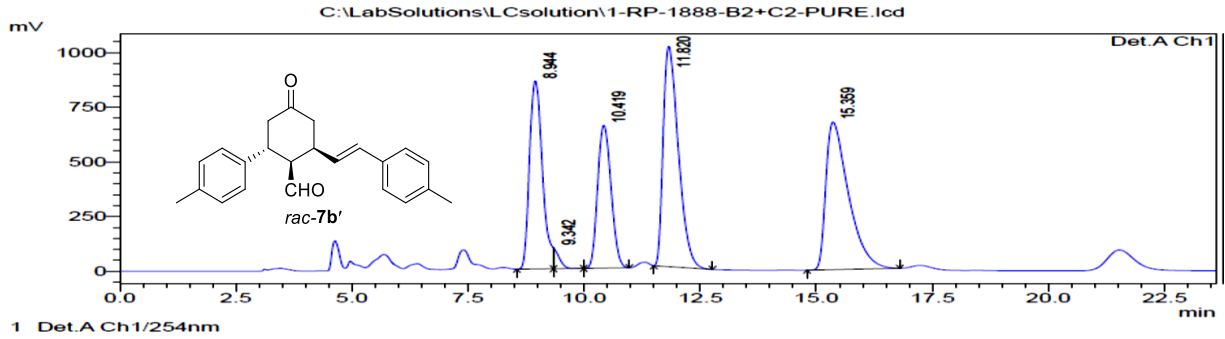

| Detector A Ch1 254nm |           |          |         |         |          |
|----------------------|-----------|----------|---------|---------|----------|
| Peak#                | Ret. Time | Area     | Height  | Area %  | Height % |
| 1                    | 8.944     | 16755699 | 861002  | 21.881  | 26.146   |
| 2                    | 9.342     | 777682   | 94496   | 1.016   | 2.870    |
| 3                    | 10.419    | 13176751 | 653432  | 17.207  | 19.843   |
| 4                    | 11.820    | 22960535 | 1008808 | 29.984  | 30.635   |
| 5                    | 15.359    | 22906112 | 675297  | 29.913  | 20.507   |
| Total                |           | 76576778 | 3293034 | 100.000 | 100.000  |

==== Shimadzu LCsolution Analysis Report ====

Acquired by : Admin  
 Sample Name : C:\LabSolutions\LCsolution\1-RP-1899-PURE-ME-C-1.lcd  
 Sample ID :  
 Vial # :  
 Injection Volume : 1 uL  
 Data File Name : 1-RP-1899-PURE-ME-C-1.lcd  
 Method File Name : ChiralPak ID-20%-1.0 mL-254nm.lcm  
 Batch File Name :  
 Report File Name : Default.lcr  
 Data Acquired : 12/16/2019 3:29:09 PM  
 Data Processed : 12/16/2019 3:53:59 PM

<Chromatogram>

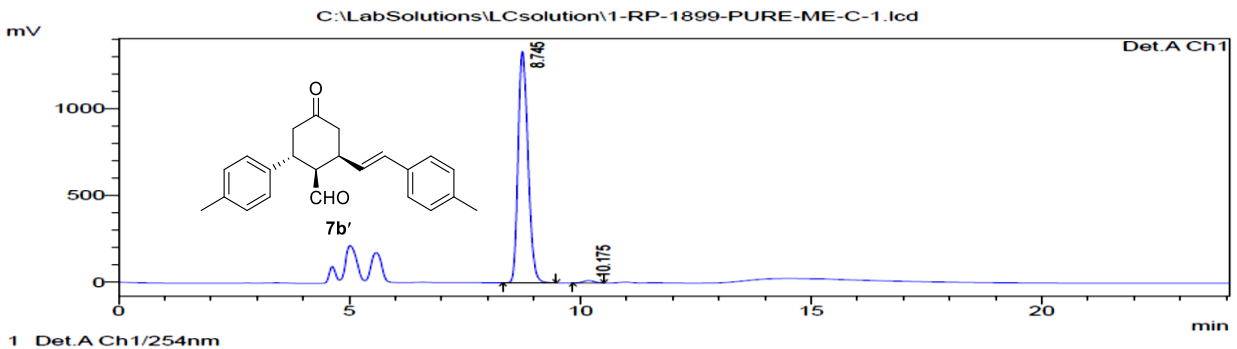

| Detector A Ch1 254nm |           |          |         |         |          |
|----------------------|-----------|----------|---------|---------|----------|
| Peak#                | Ret. Time | Area     | Height  | Area %  | Height % |
| 1                    | 8.745     | 20005328 | 1333501 | 98.868  | 98.971   |
| 2                    | 10.175    | 229153   | 13871   | 1.132   | 1.029    |
| Total                |           | 20234481 | 1347372 | 100.000 | 100.000  |



==== Shimadzu LCsolution Analysis Report ====

Acquired by : Admin  
 Sample Name :  
 Sample ID :  
 Vial # :  
 Injection Volume : 1 uL  
 Data File Name : III-PB-424-rac-ID.lcd  
 Method File Name : ChiralPak ID-30.0%-1.0 mL-254nm.lcm  
 Batch File Name :  
 Report File Name : Default.lcr  
 Data Acquired : 9/24/2019 3:50:52 PM  
 Data Processed : 9/24/2019 4:28:24 PM

<Chromatogram>

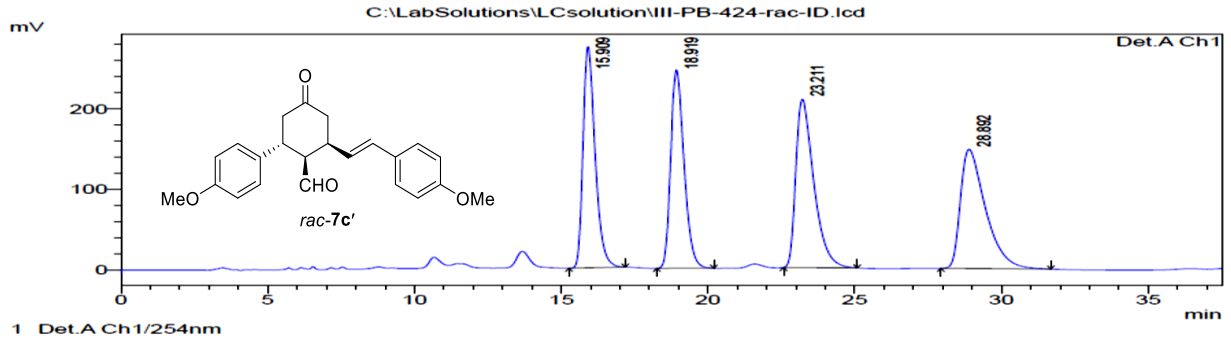

PeakTable

| Peak# | Ret. Time | Area     | Height | Area %  | Height % |
|-------|-----------|----------|--------|---------|----------|
| 1     | 15.909    | 7884233  | 274490 | 23.628  | 31.276   |
| 2     | 18.919    | 7793904  | 246307 | 23.357  | 28.065   |
| 3     | 23.211    | 8912112  | 208986 | 26.709  | 23.812   |
| 4     | 28.892    | 8777809  | 147853 | 26.306  | 16.847   |
| Total |           | 33368057 | 877636 | 100.000 | 100.000  |

==== Shimadzu LCsolution Analysis Report ====

Acquired by : Admin  
 Sample Name :  
 Sample ID :  
 Vial # :  
 Injection Volume : 1 uL  
 Data File Name : IV-PB-631.lcd  
 Method File Name : ChiralPak ID-30.0%-1.0 mL-254nm.lcm  
 Batch File Name :  
 Report File Name : Default.lcr  
 Data Acquired : 12/14/2019 12:46:54 PM  
 Data Processed : 12/14/2019 1:22:22 PM

<Chromatogram>

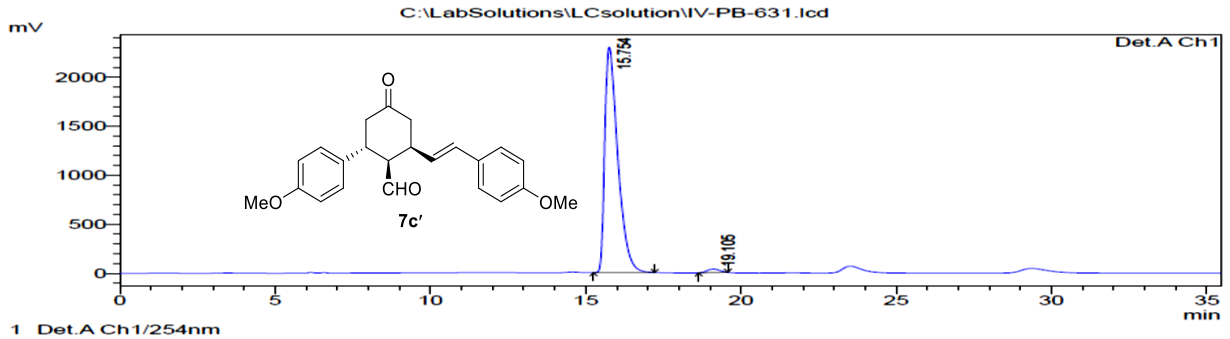

PeakTable

| Peak# | Ret. Time | Area     | Height  | Area %  | Height % |
|-------|-----------|----------|---------|---------|----------|
| 1     | 15.754    | 67170871 | 2298358 | 98.507  | 98.442   |
| 2     | 19.105    | 1018023  | 36365   | 1.493   | 1.558    |
| Total |           | 68188894 | 2334723 | 100.000 | 100.000  |

==== Shimadzu LCsolution Analysis Report ====

Acquired by : Admin  
 Sample Name : C:\LabSolutions\LCsolution\III-PB-422-rac-20%-0.7 ml.lcd  
 Sample ID :  
 Vial # :  
 Injection Volume : 1 uL  
 Data File Name : III-PB-422-rac-20%-0.7 ml.lcd  
 Method File Name : ChiralPak IC-20%-0.7 mL-254nm.lcm  
 Batch File Name :  
 Report File Name : Default.lcr  
 Data Acquired : 9/19/2019 11:19:03 AM  
 Data Processed : 9/19/2019 2:51:29 PM

<Chromatogram>

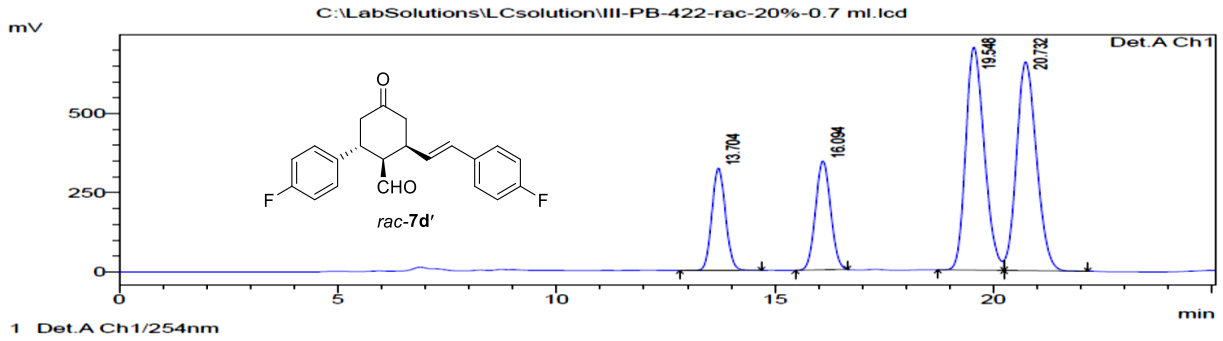

| Detector A Ch1 254nm |           |                 |                |                |                |
|----------------------|-----------|-----------------|----------------|----------------|----------------|
| Peak#                | Ret. Time | Area            | Height         | Area %         | Height %       |
| 1                    | 13.704    | 7028226         | 323038         | 12.305         | 15.914         |
| 2                    | 16.094    | 8260708         | 343585         | 14.463         | 16.926         |
| 3                    | 19.548    | 20887760        | 703822         | 36.572         | 34.672         |
| 4                    | 20.732    | 20938141        | 659476         | 36.660         | 32.488         |
| <b>Total</b>         |           | <b>57114836</b> | <b>2029922</b> | <b>100.000</b> | <b>100.000</b> |

==== Shimadzu LCsolution Analysis Report ====

Acquired by : Admin  
 Sample Name : C:\LabSolutions\LCsolution\IV-PB-630.lcd  
 Sample ID :  
 Vial # :  
 Injection Volume : 1 uL  
 Data File Name : IV-PB-630.lcd  
 Method File Name : ChiralPak IC-20%-0.7 mL-254nm.lcm  
 Batch File Name :  
 Report File Name : Default.lcr  
 Data Acquired : 12/13/2019 12:35:06 PM  
 Data Processed : 12/13/2019 1:08:58 PM

<Chromatogram>

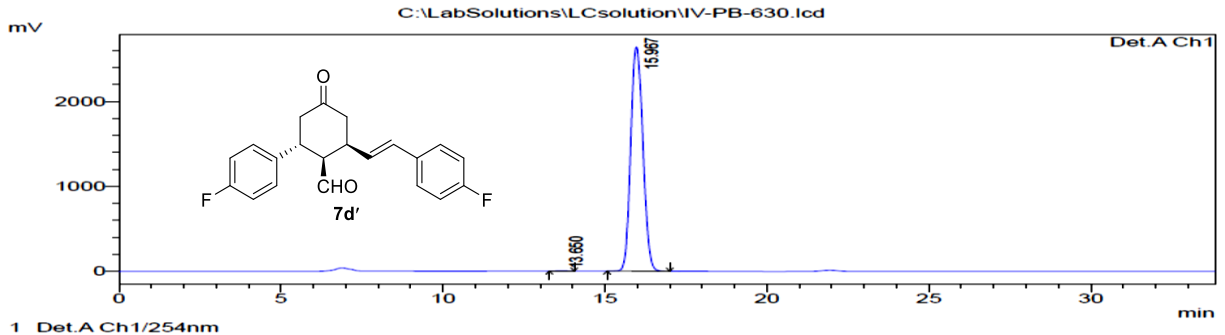

| Detector A Ch1 254nm |           |                 |                |                |                |
|----------------------|-----------|-----------------|----------------|----------------|----------------|
| Peak#                | Ret. Time | Area            | Height         | Area %         | Height %       |
| 1                    | 13.650    | 71460           | 3359           | 0.103          | 0.127          |
| 2                    | 15.967    | 69195105        | 2636154        | 99.897         | 99.873         |
| <b>Total</b>         |           | <b>69266565</b> | <b>2639514</b> | <b>100.000</b> | <b>100.000</b> |

==== Shimadzu LCsolution Analysis Report ====

Acquired by : Admin  
 Sample Name : C:\LabSolutions\LCsolution\1-RP-1892-C2-PURE.lcd  
 Sample ID :  
 Vial # :  
 Injection Volume : 1 uL  
 Data File Name : 1-RP-1892-C2-PURE.lcd  
 Method File Name : ChiralPak ID-20.0%-1.0 mL-254nm.lcm  
 Batch File Name :  
 Report File Name : Default.lcr  
 Data Acquired : 12/12/2019 9:23:58 AM  
 Data Processed : 12/12/2019 9:47:45 AM

<Chromatogram>

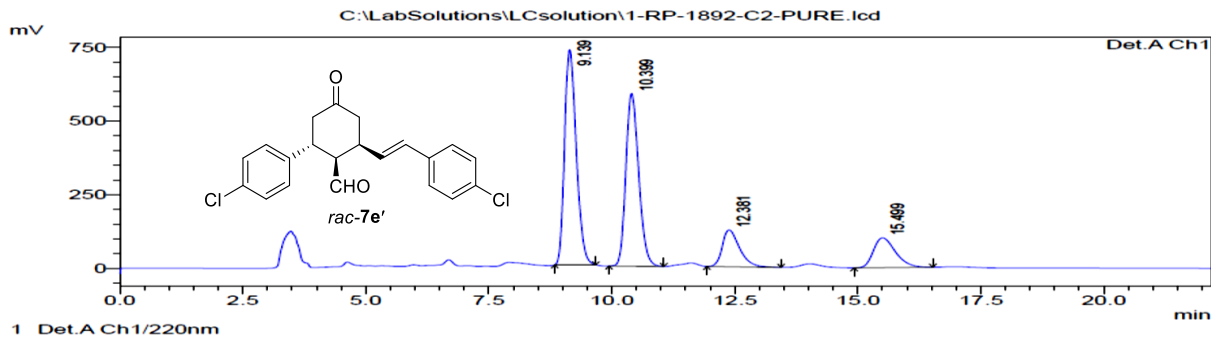

PeakTable

| Peak# | Ret. Time | Area     | Height  | Area %  | Height % |
|-------|-----------|----------|---------|---------|----------|
| 1     | 9.139     | 12109035 | 730845  | 41.798  | 47.356   |
| 2     | 10.399    | 10669290 | 586303  | 36.828  | 37.990   |
| 3     | 12.381    | 3046998  | 125057  | 10.518  | 8.103    |
| 4     | 15.499    | 3145254  | 101109  | 10.857  | 6.551    |
| Total |           | 28970577 | 1543314 | 100.000 | 100.000  |

==== Shimadzu LCsolution Analysis Report ====

Acquired by : Admin  
 Sample Name : C:\LabSolutions\LCsolution\1-RP-1899-PURE-CL-C.lcd  
 Sample ID :  
 Vial # :  
 Injection Volume : 1 uL  
 Data File Name : 1-RP-1899-PURE-CL-C.lcd  
 Method File Name : ChiralPak ID-20.0%-1.0 mL-254nm.lcm  
 Batch File Name :  
 Report File Name : Default.lcr  
 Data Acquired : 12/13/2019 3:28:26 PM  
 Data Processed : 12/13/2019 3:50:55 PM

<Chromatogram>

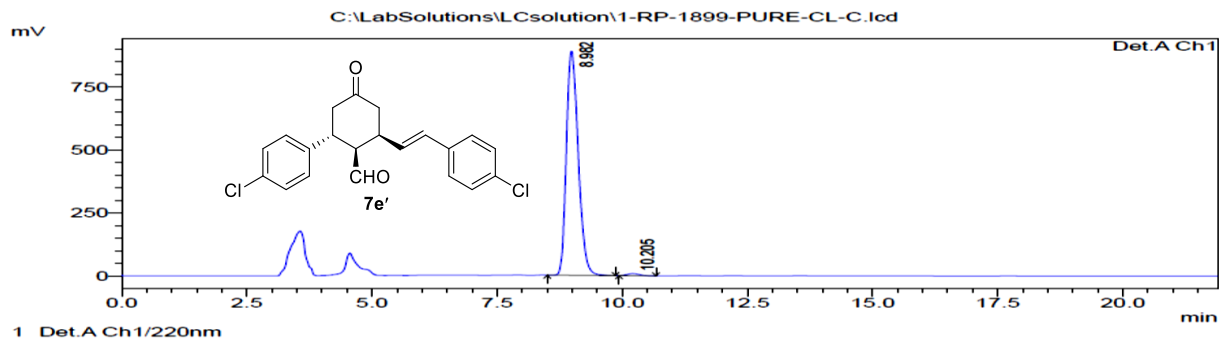

PeakTable

| Peak# | Ret. Time | Area     | Height | Area %  | Height % |
|-------|-----------|----------|--------|---------|----------|
| 1     | 8.982     | 14697511 | 889697 | 99.025  | 99.041   |
| 2     | 10.205    | 144666   | 8611   | 0.975   | 0.959    |
| Total |           | 14842178 | 898309 | 100.000 | 100.000  |

==== Shimadzu LCsolution Analysis Report ====

Acquired by : Admin  
 Sample Name :  
 Sample ID :  
 Vial # :  
 Injection Volume : 1 uL  
 Data File Name : 1-RP-1893-C2-PURE.lcd  
 Method File Name : ChiralPak ID-20.0%-1.0 mL-254nm.lcm  
 Batch File Name :  
 Report File Name : Default.lcr  
 Data Acquired : 12/12/2019 9:54:41 AM  
 Data Processed : 12/12/2019 11:04:23 AM

<Chromatogram>

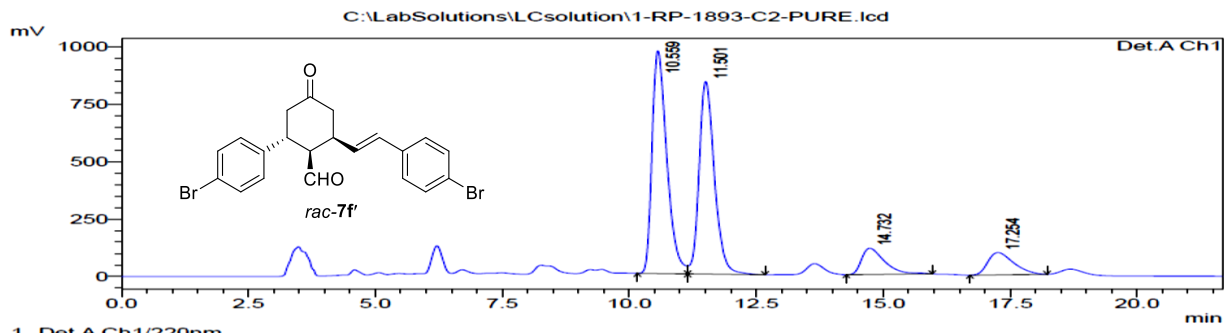

1 Det.A Ch1/220nm

| Peak#        | Ret. Time | Area            | Height         | Area %         | Height %       |
|--------------|-----------|-----------------|----------------|----------------|----------------|
| 1            | 10.559    | 19658119        | 968772         | 44.393         | 48.010         |
| 2            | 11.501    | 17596876        | 838021         | 39.738         | 41.530         |
| 3            | 14.732    | 3600297         | 114138         | 8.130          | 5.656          |
| 4            | 17.254    | 3427001         | 96937          | 7.739          | 4.804          |
| <b>Total</b> |           | <b>44282292</b> | <b>2017868</b> | <b>100.000</b> | <b>100.000</b> |

==== Shimadzu LCsolution Analysis Report ====

Acquired by : Admin  
 Sample Name :  
 Sample ID :  
 Vial # :  
 Injection Volume : 1 uL  
 Data File Name : 1-RP-1901-PURE-BR-C-1.lcd  
 Method File Name : ChiralPak ID-20.0%-1.0 mL-254nm.lcm  
 Batch File Name :  
 Report File Name : Default.lcr  
 Data Acquired : 12/18/2019 4:22:20 PM  
 Data Processed : 12/18/2019 5:06:11 PM

<Chromatogram>

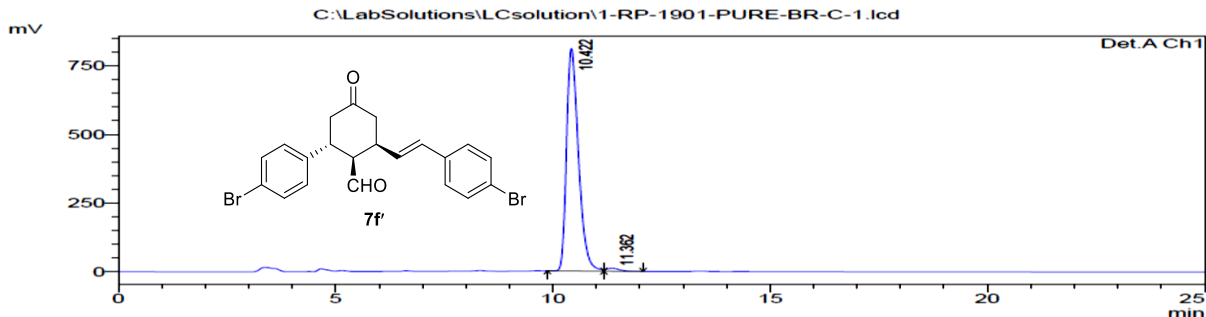

1 Det.A Ch1/220nm

| Peak#        | Ret. Time | Area            | Height        | Area %         | Height %       |
|--------------|-----------|-----------------|---------------|----------------|----------------|
| 1            | 10.422    | 15470060        | 810854        | 98.600         | 98.713         |
| 2            | 11.362    | 219581          | 10572         | 1.400          | 1.287          |
| <b>Total</b> |           | <b>15689641</b> | <b>821427</b> | <b>100.000</b> | <b>100.000</b> |

## ==== Shimadzu LCsolution Analysis Report ====

C:\LabSolutions\LCsolution\1-RP-1926-PURE-RM-1.lcd  
 Acquired by : Admin  
 Sample Name :  
 Sample ID :  
 Vial # :  
 Injection Volume : 1 uL  
 Data File Name : 1-RP-1926-PURE-RM-1.lcd  
 Method File Name : ChiralPak ID-30.0%-1.0 mL-254nm.lcm  
 Batch File Name :  
 Report File Name : Default.lcr  
 Data Acquired : 12/31/2019 11:19:30 AM  
 Data Processed : 12/31/2019 12:19:35 PM

### <Chromatogram>

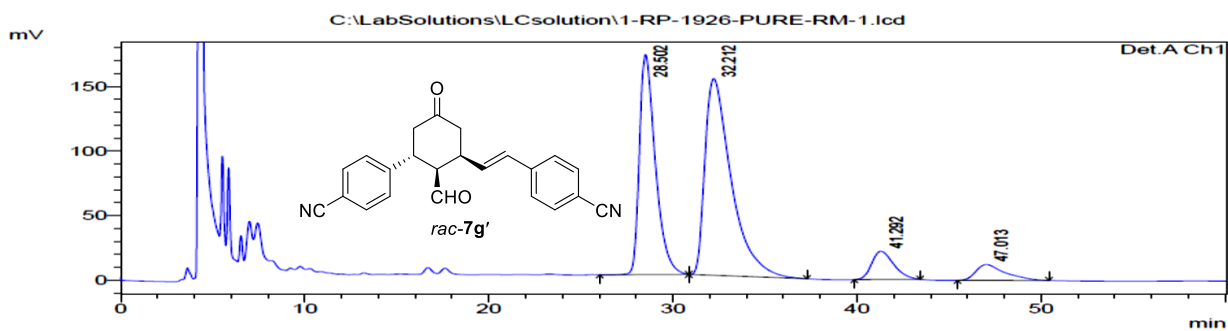

PeakTable

| Peak#        | Ret. Time | Area            | Height        | Area %         | Height %       |
|--------------|-----------|-----------------|---------------|----------------|----------------|
| 1            | 28.502    | 10252448        | 170267        | 35.883         | 47.733         |
| 2            | 32.212    | 15154639        | 152271        | 53.040         | 42.688         |
| 3            | 41.292    | 1812763         | 21857         | 6.345          | 6.128          |
| 4            | 47.013    | 1352257         | 12310         | 4.733          | 3.451          |
| <b>Total</b> |           | <b>28572107</b> | <b>356705</b> | <b>100.000</b> | <b>100.000</b> |

## ==== Shimadzu LCsolution Analysis Report ====

C:\LabSolutions\LCsolution\1-RP-1927-PURE-CHIRAL.lcd  
 Acquired by : Admin  
 Sample Name :  
 Sample ID :  
 Vial # :  
 Injection Volume : 1 uL  
 Data File Name : 1-RP-1927-PURE-CHIRAL.lcd  
 Method File Name : ChiralPak ID-30.0%-1.0 mL-254nm.lcm  
 Batch File Name :  
 Report File Name : Default.lcr  
 Data Acquired : 12/31/2019 12:19:59 PM  
 Data Processed : 12/31/2019 1:27:57 PM

### <Chromatogram>

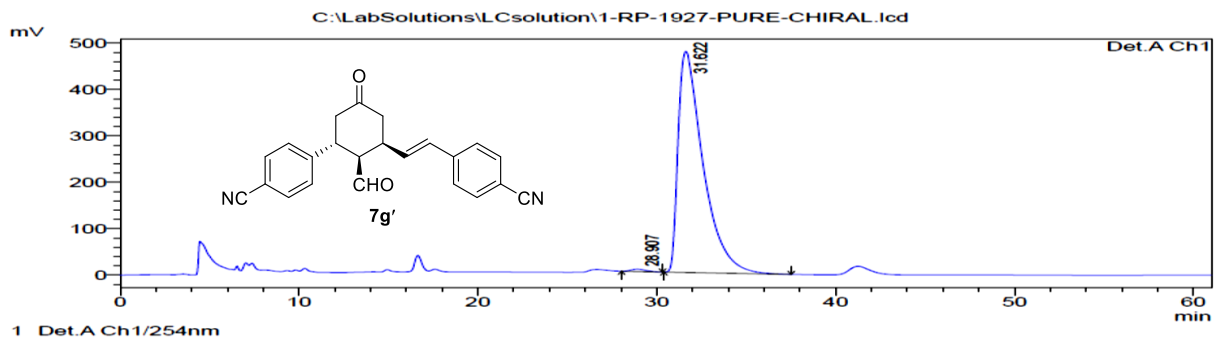

PeakTable

| Peak#        | Ret. Time | Area            | Height        | Area %         | Height %       |
|--------------|-----------|-----------------|---------------|----------------|----------------|
| 1            | 28.907    | 295099          | 5035          | 0.634          | 1.046          |
| 2            | 31.622    | 46228395        | 476279        | 99.366         | 98.954         |
| <b>Total</b> |           | <b>46523494</b> | <b>481314</b> | <b>100.000</b> | <b>100.000</b> |

==== Shimadzu LCsolution Analysis Report ====

Acquired by : Admin  
 Sample Name : C:\LabSolutions\LCsolution\IV-PB-665-RAC-ID.lcd  
 Sample ID :  
 Vial # :  
 Injection Volume : 1 uL  
 Data File Name : IV-PB-665-RAC-ID.lcd  
 Method File Name : ChiralPak ID-30.0%-1.0 mL-254nm.lcm  
 Batch File Name :  
 Report File Name : Default.lcr  
 Data Acquired : 1/2/2020 11:40:20 AM  
 Data Processed : 1/2/2020 1:16:52 PM

<Chromatogram>

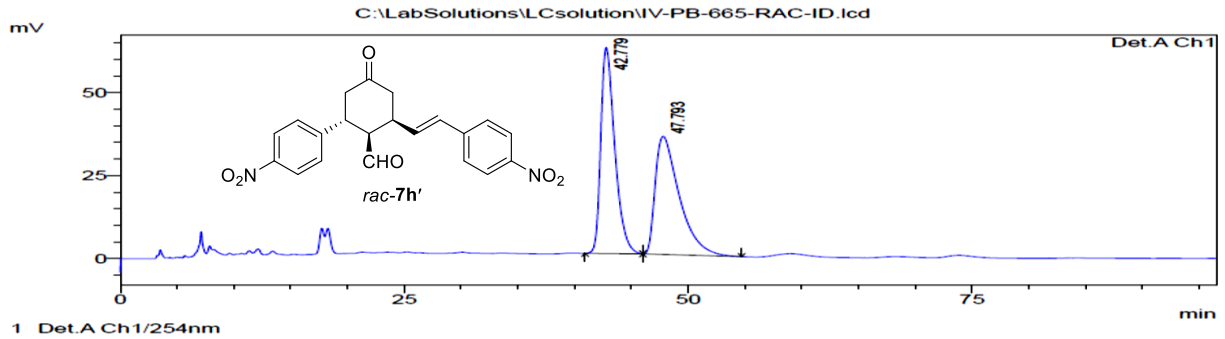

| PeakTable    |           |                 |              |                |                |  |
|--------------|-----------|-----------------|--------------|----------------|----------------|--|
| Peak#        | Ret. Time | Area            | Height       | Area %         | Height %       |  |
| 1            | 42.779    | 5322912         | 62081        | 50.311         | 63.564         |  |
| 2            | 47.793    | 5257135         | 35587        | 49.689         | 36.436         |  |
| <b>Total</b> |           | <b>10580047</b> | <b>97668</b> | <b>100.000</b> | <b>100.000</b> |  |

==== Shimadzu LCsolution Analysis Report ====

Acquired by : Admin  
 Sample Name : C:\LabSolutions\LCsolution\IV-PB-640.lcd  
 Sample ID :  
 Vial # :  
 Injection Volume : 1 uL  
 Data File Name : IV-PB-640.lcd  
 Method File Name : ChiralPak ID-30.0%-1.0 mL-254nm.lcm  
 Batch File Name :  
 Report File Name : Default.lcr  
 Data Acquired : 1/3/2020 12:24:25 PM  
 Data Processed : 1/3/2020 1:59:39 PM

<Chromatogram>

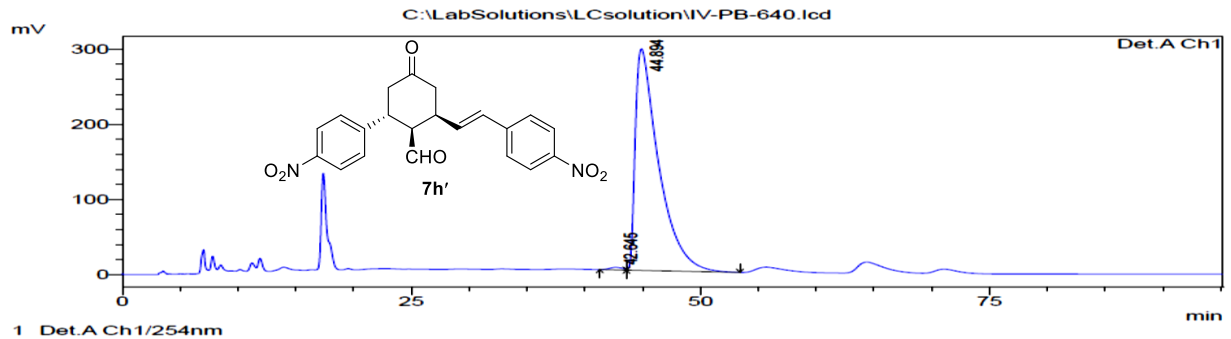

| PeakTable    |           |                 |               |                |                |  |
|--------------|-----------|-----------------|---------------|----------------|----------------|--|
| Peak#        | Ret. Time | Area            | Height        | Area %         | Height %       |  |
| 1            | 42.645    | 270415          | 3400          | 0.649          | 1.139          |  |
| 2            | 44.894    | 41417673        | 295181        | 99.351         | 98.861         |  |
| <b>Total</b> |           | <b>41688088</b> | <b>298581</b> | <b>100.000</b> | <b>100.000</b> |  |

==== Shimadzu LCsolution Analysis Report ====

Acquired by : Admin  
 Sample Name : C:\LabSolutions\LCsolution\MB-2-OMe-RAC-15%-0.7-IC-1.lcd  
 Sample ID :  
 Vial # :  
 Injection Volume : 1 uL  
 Data File Name : MB-2-OMe-RAC-15%-0.7-IC-1.lcd  
 Method File Name : ChiralPak IC-15.0%-0.70 mL-254nm.lcm  
 Batch File Name :  
 Report File Name : Default.lcr  
 Data Acquired : 10/2/2019 3:10:12 PM  
 Data Processed : 10/2/2019 4:07:26 PM

<Chromatogram>

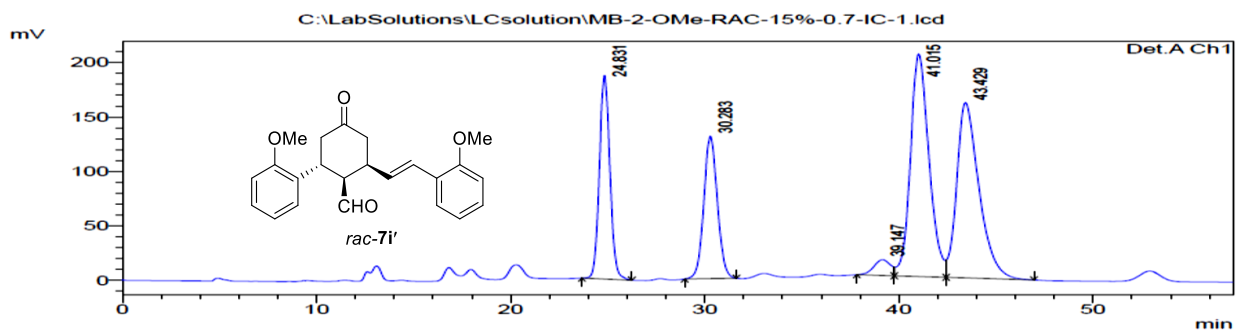

PeakTable

| Peak# | Ret. Time | Area     | Height | Area %  | Height % |
|-------|-----------|----------|--------|---------|----------|
| 1     | 24.831    | 7067251  | 187150 | 17.318  | 26.817   |
| 2     | 30.283    | 6358099  | 130867 | 15.580  | 18.752   |
| 3     | 39.147    | 870193   | 14513  | 2.132   | 2.080    |
| 4     | 41.015    | 13657376 | 204365 | 33.466  | 29.284   |
| 5     | 43.429    | 12856505 | 160972 | 31.504  | 23.066   |
| Total |           | 40809425 | 697867 | 100.000 | 100.000  |

==== Shimadzu LCsolution Analysis Report ====

Acquired by : Admin  
 Sample Name : C:\LabSolutions\LCsolution\IV-PB-635.lcd  
 Sample ID :  
 Vial # :  
 Injection Volume : 1 uL  
 Data File Name : IV-PB-635.lcd  
 Method File Name : ChiralPak IC-15.0%-0.70 mL-254nm.lcm  
 Batch File Name :  
 Report File Name : Default.lcr  
 Data Acquired : 12/14/2019 1:34:17 PM  
 Data Processed : 12/14/2019 2:30:17 PM

<Chromatogram>

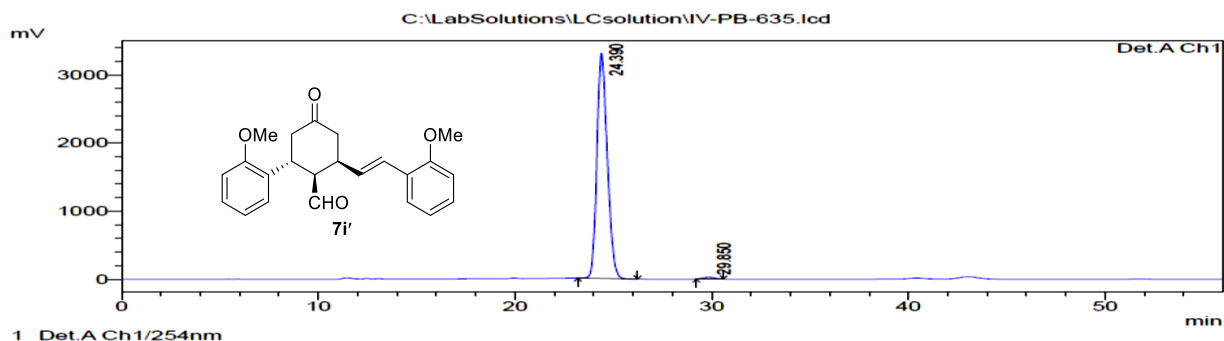

PeakTable

| Peak# | Ret. Time | Area      | Height  | Area %  | Height % |
|-------|-----------|-----------|---------|---------|----------|
| 1     | 24.390    | 121382784 | 3307879 | 99.071  | 99.175   |
| 2     | 29.850    | 1138433   | 27523   | 0.929   | 0.825    |
| Total |           | 122521217 | 3335402 | 100.000 | 100.000  |

==== Shimadzu LCsolution Analysis Report ====

Acquired by : Admin  
 Sample Name : C:\LabSolutions\LCsolution\IV-PB-653-3-0MeRAC-IB-10%.lcd  
 Sample ID :  
 Vail # :  
 Injection Volume : 1 uL  
 Data File Name : IV-PB-653-3-0MeRAC-IB-10%.lcd  
 Method File Name : ChiralPak IB-10%-1.0 mL-254nm.lcm  
 Batch File Name :  
 Report File Name : Default.lcr  
 Data Acquired : 1/14/2020 10:42:04 AM  
 Data Processed : 1/14/2020 12:28:46 PM

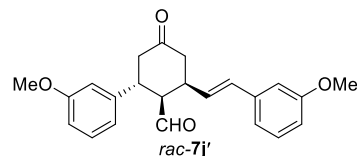

<Chromatogram>

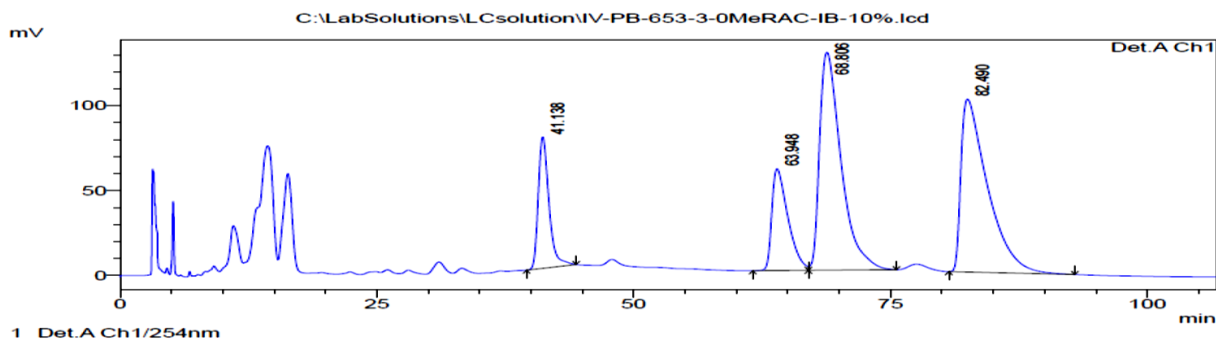

PeakTable

| Peak# | Ret. Time | Area     | Height | Area %  | Height % |
|-------|-----------|----------|--------|---------|----------|
| 1     | 41.138    | 5627367  | 77458  | 11.417  | 21.063   |
| 2     | 63.948    | 6536745  | 59980  | 13.262  | 16.311   |
| 3     | 68.806    | 18747203 | 128387 | 38.034  | 34.913   |
| 4     | 82.490    | 18379041 | 101914 | 37.287  | 27.714   |
| Total |           | 49290356 | 367739 | 100.000 | 100.000  |

==== Shimadzu LCsolution Analysis Report ====

Acquired by : Admin  
 Sample Name : C:\LabSolutions\LCsolution\IV-PB-661-3-0MeQDT.lcd  
 Sample ID :  
 Vail # :  
 Injection Volume : 1 uL  
 Data File Name : IV-PB-661-3-0MeQDT.lcd  
 Method File Name : ChiralPak IB-10%-1.0 mL-254nm.lcm  
 Batch File Name :  
 Report File Name : Default.lcr  
 Data Acquired : 1/14/2020 12:32:42 PM  
 Data Processed : 1/14/2020 2:16:59 PM

<Chromatogram>

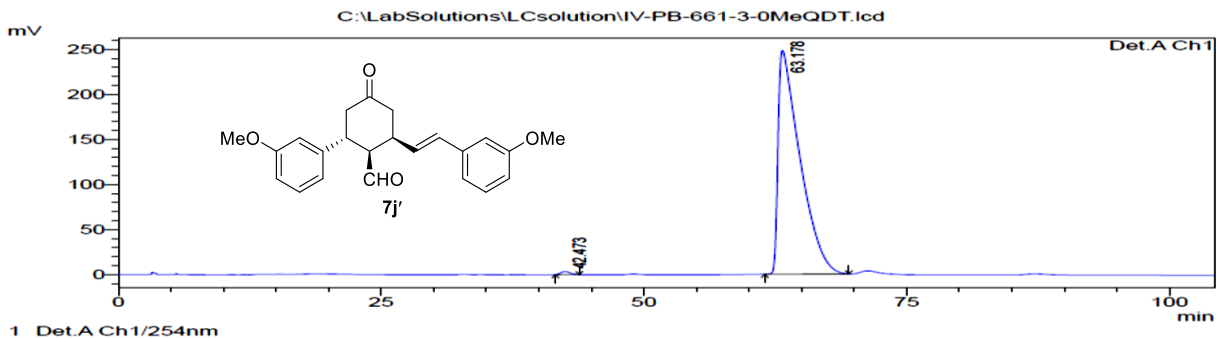

PeakTable

| Peak# | Ret. Time | Area     | Height | Area %  | Height % |
|-------|-----------|----------|--------|---------|----------|
| 1     | 42.473    | 217033   | 3515   | 0.600   | 1.397    |
| 2     | 63.178    | 35982514 | 248185 | 99.400  | 98.603   |
| Total |           | 36199547 | 251701 | 100.000 | 100.000  |



==== Shimadzu LCsolution Analysis Report ====

Acquired by : Admin  
 Sample Name : C:\LabSolutions\LCsolution\III-PB-439-RAC-IB.lcd  
 Sample ID :  
 Vial # :  
 Injection Volume : 1 uL  
 Data File Name : III-PB-439-RAC-IB.lcd  
 Method File Name : ChiralPak IB-40%-1 mL-254nm.lcm  
 Batch File Name :  
 Report File Name : Default.lcr  
 Data Acquired : 10/4/2019 2:39:32 PM  
 Data Processed : 10/4/2019 3:37:31 PM

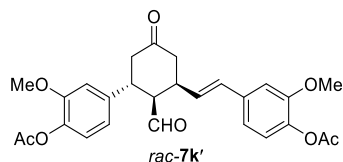

<Chromatogram>

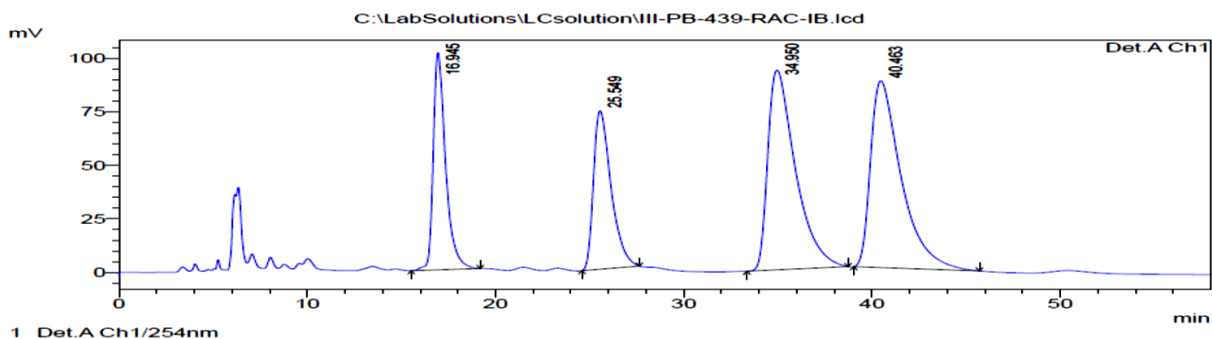

1 Det.A Ch1/254nm

| Detector A Ch1 254nm |           |          |        |         |          |
|----------------------|-----------|----------|--------|---------|----------|
| Peak#                | Ret. Time | Area     | Height | Area %  | Height % |
| 1                    | 16.945    | 4642998  | 101609 | 16.088  | 28.491   |
| 2                    | 25.549    | 4821022  | 74170  | 16.705  | 20.797   |
| 3                    | 34.950    | 9529607  | 93441  | 33.020  | 26.201   |
| 4                    | 40.463    | 9866874  | 87416  | 34.188  | 24.511   |
| Total                |           | 28860501 | 356636 | 100.000 | 100.000  |

==== Shimadzu LCsolution Analysis Report ====

Acquired by : Admin  
 Sample Name : C:\LabSolutions\LCsolution\IV-PB-632.lcd  
 Sample ID :  
 Vial # :  
 Injection Volume : 1 uL  
 Data File Name : IV-PB-632.lcd  
 Method File Name : ChiralPak IB-40%-1 mL-254nm.lcm  
 Batch File Name :  
 Report File Name : Default.lcr  
 Data Acquired : 12/12/2019 5:37:13 PM  
 Data Processed : 12/12/2019 6:35:15 PM

<Chromatogram>

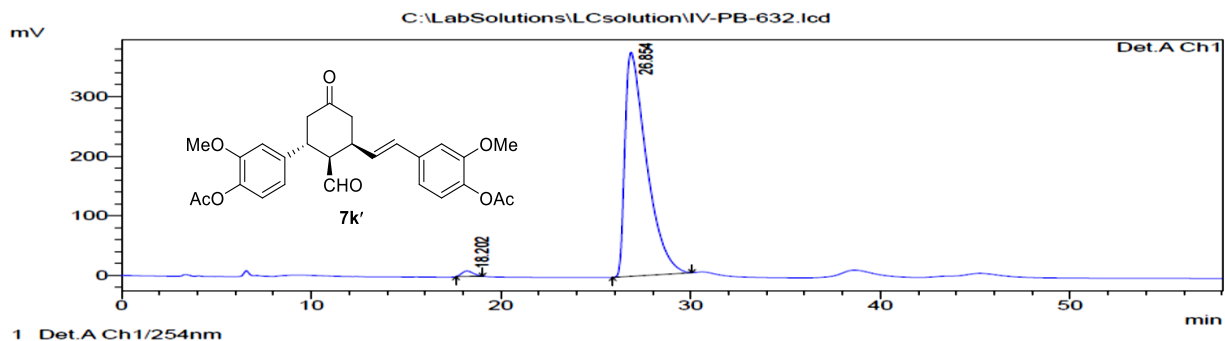

1 Det.A Ch1/254nm

| Detector A Ch1 254nm |           |          |        |         |          |
|----------------------|-----------|----------|--------|---------|----------|
| Peak#                | Ret. Time | Area     | Height | Area %  | Height % |
| 1                    | 18.202    | 386513   | 9133   | 1.283   | 2.372    |
| 2                    | 26.854    | 29750424 | 375935 | 98.717  | 97.628   |
| Total                |           | 30136937 | 385068 | 100.000 | 100.000  |

==== Shimadzu LCsolution Analysis Report ====

C:\LabSolutions\LCsolution\I-NS-143 RACEMIC2.lcd  
 Acquired by : Admin  
 Sample Name : I-NS-143-IC  
 Sample ID :  
 Vial # :  
 Injection Volume : 2 uL  
 Data File Name : I-NS-143 RACEMIC2.lcd  
 Method File Name : ChiralPak IC-20%-1.0 mL-220nm.lcm  
 Batch File Name :  
 Report File Name : Default.lcr  
 Data Acquired : 4/3/2021 4:16:50 PM  
 Data Processed : 4/3/2021 5:16:54 PM

<Chromatogram>

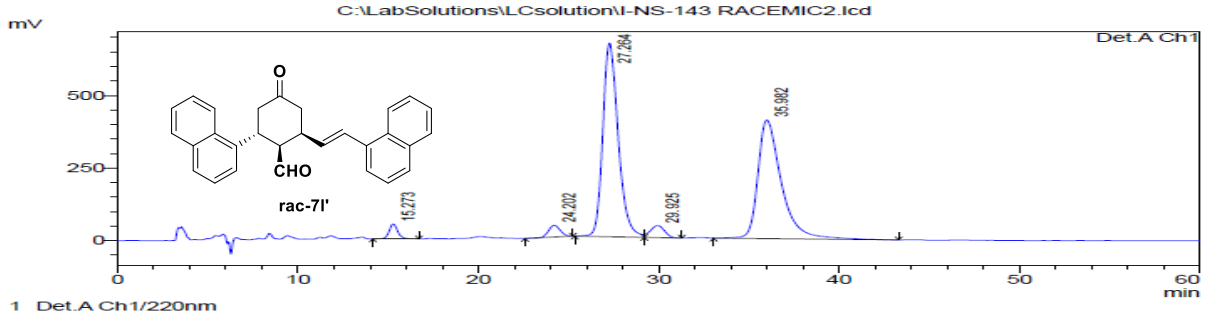

PeakTable

| Peak# | Ret. Time | Area     | Height  | Area %  | Height % |
|-------|-----------|----------|---------|---------|----------|
| 1     | 15.273    | 1702491  | 51634   | 2.065   | 4.265    |
| 2     | 24.202    | 1755266  | 40448   | 2.129   | 3.341    |
| 3     | 27.264    | 39653049 | 667323  | 48.091  | 55.127   |
| 4     | 29.925    | 2278022  | 41951   | 2.763   | 3.466    |
| 5     | 35.982    | 37066172 | 409170  | 44.953  | 33.801   |
| Total |           | 82455000 | 1210526 | 100.000 | 100.000  |

==== Shimadzu LCsolution Analysis Report ====

C:\LabSolutions\LCsolution\I-NS-128NEW 2.lcd  
 Acquired by : Admin  
 Sample Name : I-NS-128-IC  
 Sample ID :  
 Vial # :  
 Injection Volume : 1 uL  
 Data File Name : I-NS-128NEW 2.lcd  
 Method File Name : ChiralPak IC-20%-1.0 mL-220nm.lcm  
 Batch File Name :  
 Report File Name : Default.lcr  
 Data Acquired : 4/3/2021 7:25:54 PM  
 Data Processed : 4/5/2021 1:32:54 PM

<Chromatogram>

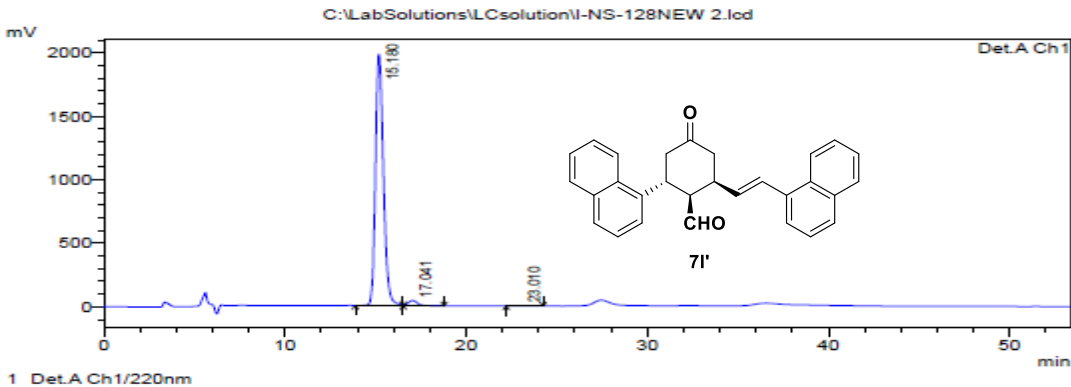

PeakTable

| Peak# | Ret. Time | Area     | Height  | Area %  | Height % |
|-------|-----------|----------|---------|---------|----------|
| 1     | 15.180    | 60634009 | 1980050 | 97.593  | 97.957   |
| 2     | 17.041    | 1453558  | 40652   | 2.340   | 2.011    |
| 3     | 23.010    | 41789    | 636     | 0.067   | 0.031    |
| Total |           | 62129355 | 2021338 | 100.000 | 100.000  |

# ==== Shimadzu LCsolution Analysis Report ====

C:\LabSolutions\LCsolution\1-RP-1985-PURE-RM-1.lcd  
 Acquired by : Admin  
 Sample Name :  
 Sample ID :  
 Vial # :  
 Injection Volume : 1 uL  
 Data File Name : 1-RP-1985-PURE-RM-1.lcd  
 Method File Name : ChiralPak ID-20.0%-1.0 mL-254nm.lcm  
 Batch File Name :  
 Report File Name : Default.lcr  
 Data Acquired : 1/23/2020 1:04:46 PM  
 Data Processed : 1/28/2020 2:22:16 PM

## <Chromatogram>

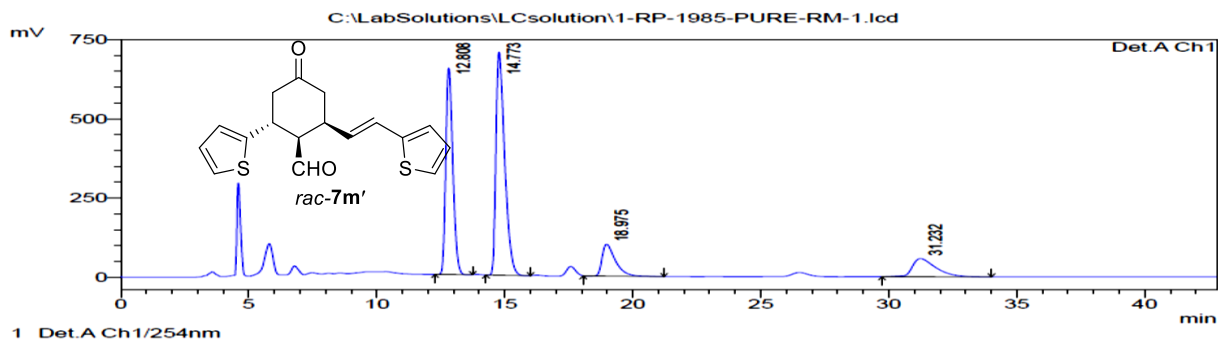

PeakTable

| Detector A Ch1 254nm |           |                 |                |                |                |  |
|----------------------|-----------|-----------------|----------------|----------------|----------------|--|
| Peak#                | Ret. Time | Area            | Height         | Area %         | Height %       |  |
| 1                    | 12.808    | 12465893        | 651609         | 34.159         | 43.028         |  |
| 2                    | 14.773    | 16745782        | 704521         | 45.887         | 46.522         |  |
| 3                    | 18.975    | 3586929         | 100665         | 9.829          | 6.647          |  |
| 4                    | 31.232    | 3695106         | 57594          | 10.125         | 3.803          |  |
| <b>Total</b>         |           | <b>36493710</b> | <b>1514389</b> | <b>100.000</b> | <b>100.000</b> |  |

## ==== Shimadzu LCsolution Analysis Report ====

C:\LabSolutions\LCsolution\1-RP-1977-PURE-CHIRAL.lcd  
 Acquired by : Admin  
 Sample Name :  
 Sample ID :  
 Vial # :  
 Injection Volume : 1 uL  
 Data File Name : 1-RP-1977-PURE-CHIRAL.lcd  
 Method File Name : ChiralPak ID-20.0%-1.0 mL-254nm.lcm  
 Batch File Name :  
 Report File Name : Default.lcr  
 Data Acquired : 1/23/2020 1:48:31 PM  
 Data Processed : 1/23/2020 2:32:50 PM

### <Chromatogram>

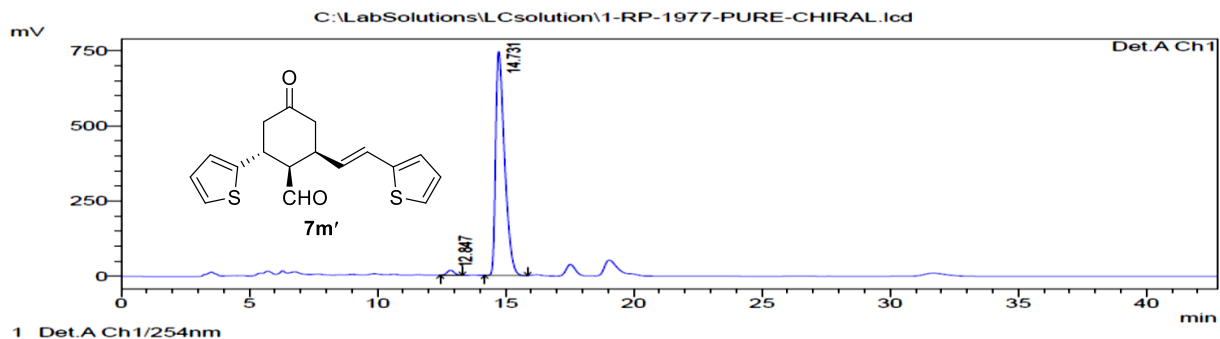

| Detector A Ch1 254nm |           |                 |               |                |                |  |
|----------------------|-----------|-----------------|---------------|----------------|----------------|--|
| Peak#                | Ret. Time | Area            | Height        | Area %         | Height %       |  |
| 1                    | 12.847    | 322493          | 16590         | 1.756          | 2.179          |  |
| 2                    | 14.731    | 18045835        | 744610        | 98.244         | 97.821         |  |
| <b>Total</b>         |           | <b>18368328</b> | <b>761200</b> | <b>100.000</b> | <b>100.000</b> |  |

## ==== Shimadzu LCsolution Analysis Report ====

C:\LabSolutions\LCsolution\IV-PB-712-RAC-IB-2.lcd  
 Acquired by : Admin  
 Sample Name :  
 Sample ID :  
 Vial # :  
 Injection Volume : 1 uL  
 Data File Name : IV-PB-712-RAC-IB-2.lcd  
 Method File Name : ChiralPak IB-15%-1.0 mL-254nm.lcm  
 Batch File Name :  
 Report File Name : Default.lcr  
 Data Acquired : 2/4/2020 4:10:13 PM  
 Data Processed : 2/4/2020 5:17:51 PM

### <Chromatogram>

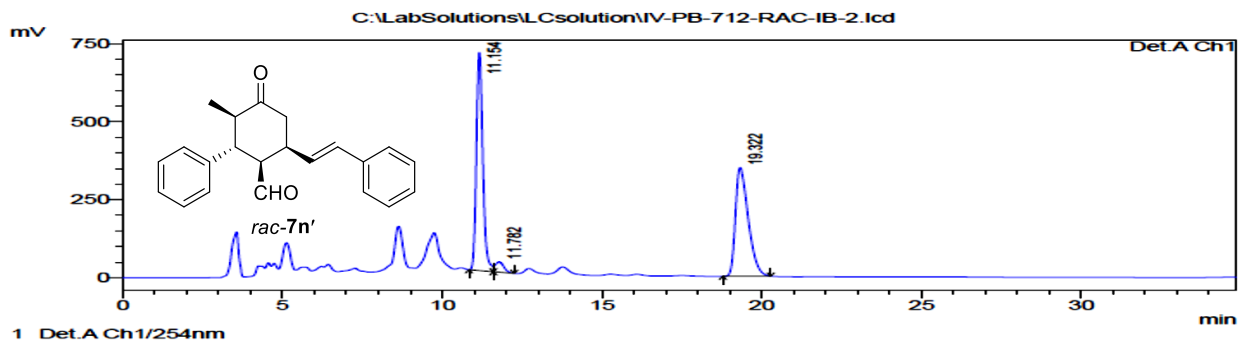

| Detector A Ch1 254nm |           |                 |                |                |                |  |
|----------------------|-----------|-----------------|----------------|----------------|----------------|--|
| Peak#                | Ret. Time | Area            | Height         | Area %         | Height %       |  |
| 1                    | 11.154    | 9825353         | 699599         | 48.762         | 64.656         |  |
| 2                    | 11.782    | 612115          | 33619          | 3.038          | 3.107          |  |
| 3                    | 19.322    | 9712159         | 348808         | 48.200         | 32.237         |  |
| <b>Total</b>         |           | <b>20149627</b> | <b>1082025</b> | <b>100.000</b> | <b>100.000</b> |  |

==== Shimadzu LCsolution Analysis Report ====

Acquired by : Admin  
 Sample Name :  
 Sample ID :  
 Vial # :  
 Injection Volume : 1 uL  
 Data File Name : IV-PB-712-up-4.lcd  
 Method File Name : ChiralPak IB-15%-1.0 mL-254nm.lcm  
 Batch File Name :  
 Report File Name : Default.lcr  
 Data Acquired : 2/5/2020 9:52:41 AM  
 Data Processed : 2/5/2020 10:27:50 AM

<Chromatogram>

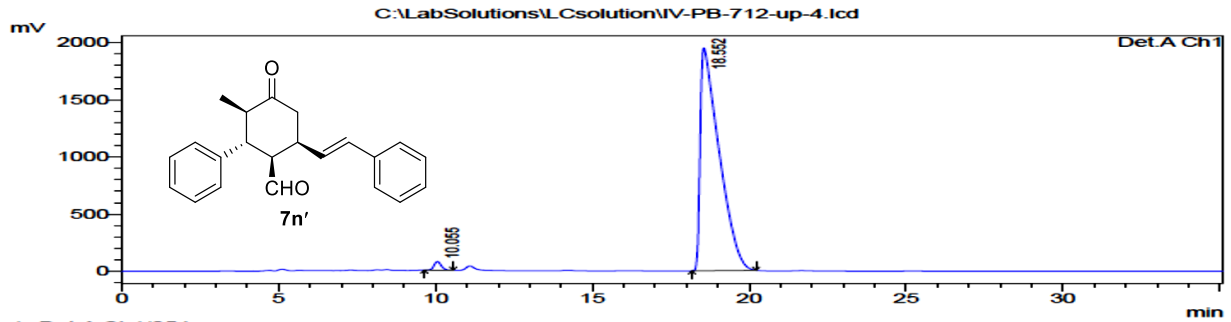

| Detector A Ch1 254nm |           |          |         |         |          |
|----------------------|-----------|----------|---------|---------|----------|
| Peak#                | Ret. Time | Area     | Height  | Area %  | Height % |
| 1                    | 10.055    | 1184374  | 75174   | 1.427   | 3.714    |
| 2                    | 18.552    | 81841272 | 1949107 | 98.573  | 96.286   |
| Total                |           | 83025645 | 2024281 | 100.000 | 100.000  |

==== Shimadzu LCsolution Analysis Report ====

Acquired by : Admin  
 Sample Name :  
 Sample ID :  
 Vial # :  
 Injection Volume : 1 uL  
 Data File Name : IV-PB-741-RAC.lcd  
 Method File Name : ChiralPak ID-30.0%-1.0 mL-254nm.lcm  
 Batch File Name :  
 Report File Name : Default.lcr  
 Data Acquired : 2/11/2020 11:48:36 AM  
 Data Processed : 2/11/2020 12:38:31 PM

<Chromatogram>

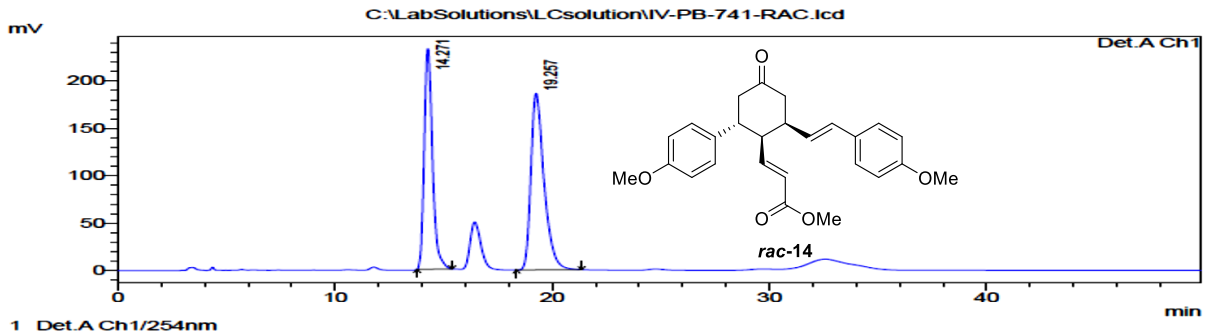

| Detector A Ch1 254nm |           |          |        |         |          |
|----------------------|-----------|----------|--------|---------|----------|
| Peak#                | Ret. Time | Area     | Height | Area %  | Height % |
| 1                    | 14.271    | 6158281  | 232661 | 43.942  | 55.556   |
| 2                    | 19.257    | 7856238  | 186122 | 56.058  | 44.444   |
| Total                |           | 14014519 | 418783 | 100.000 | 100.000  |

==== Shimadzu LCsolution Analysis Report ====

Acquired by : Admin  
 Sample Name : C:\LabSolutions\LCsolution\IV-PB-744-1.lcd  
 Sample ID :  
 Vial # :  
 Injection Volume : 1 uL  
 Data File Name : IV-PB-744-1.lcd  
 Method File Name : ChiralPak ID-30.0%-1.0 mL-254nm.lcm  
 Batch File Name :  
 Report File Name : Default.lcr  
 Data Acquired : 2/11/2020 2:14:15 PM  
 Data Processed : 2/11/2020 2:54:43 PM

<Chromatogram>

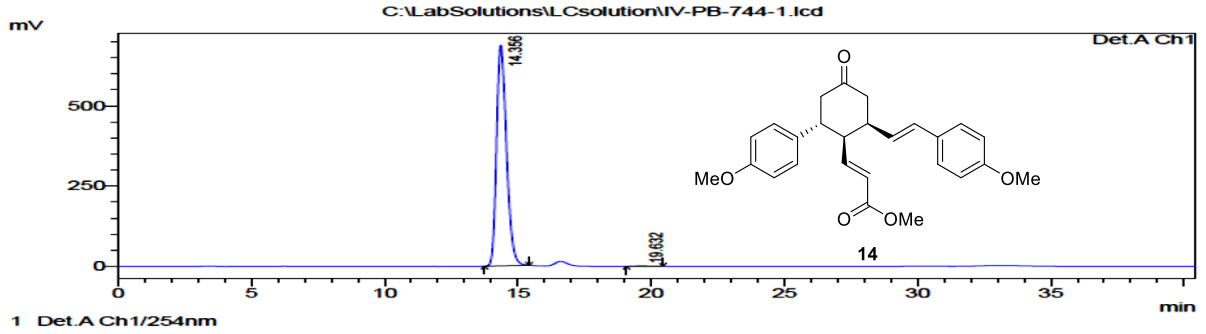

PeakTable

| Peak# | Ret. Time | Area     | Height | Area %  | Height % |
|-------|-----------|----------|--------|---------|----------|
| 1     | 14.356    | 17849654 | 687512 | 99.749  | 99.834   |
| 2     | 19.632    | 44918    | 1140   | 0.251   | 0.166    |
| Total |           | 17894572 | 688652 | 100.000 | 100.000  |

==== Shimadzu LCsolution Analysis Report ====

Acquired by : Admin  
 Sample Name : C:\LabSolutions\LCsolution\1-SJ-1996-ODH-30%1.lcd  
 Sample ID :  
 Vial # :  
 Injection Volume : 1 uL  
 Data File Name : 1-SJ-1996-ODH-30%1.lcd  
 Method File Name : ChiralPak OD-H-30%-1.0 mL-254nm.lcm  
 Batch File Name :  
 Report File Name : Default.lcr  
 Data Acquired : 10/22/2020 10:12:31 AM  
 Data Processed : 10/22/2020 11:01:55 AM

<Chromatogram>

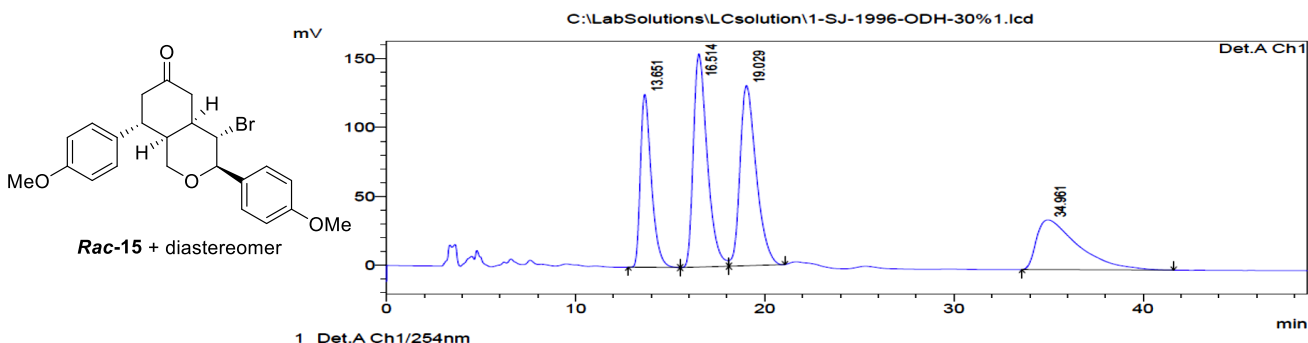

PeakTable

| Peak# | Ret. Time | Area     | Height | Area %  | Height % |
|-------|-----------|----------|--------|---------|----------|
| 1     | 13.651    | 5056610  | 125453 | 19.260  | 28.067   |
| 2     | 16.514    | 7905823  | 154661 | 30.113  | 34.602   |
| 3     | 19.029    | 7796640  | 130784 | 29.697  | 29.260   |
| 4     | 34.961    | 5494921  | 36080  | 20.930  | 8.072    |
| Total |           | 26253995 | 446978 | 100.000 | 100.000  |

==== Shimadzu LCsolution Analysis Report ====

Acquired by : Admin  
 Sample Name : C:\LabSolutions\LCsolution\1-SJ-1998.lcd  
 Sample ID :  
 Vial # :  
 Injection Volume : 1 uL  
 Data File Name : 1-SJ-1998.lcd  
 Method File Name : ChiralPak OD-H-30%-1.0 mL-254nm.lcm  
 Batch File Name :  
 Report File Name : Default.lcr  
 Data Acquired : 10/22/2020 10:17:25 AM  
 Data Processed : 11/12/2020 10:41:20 AM

<Chromatogram>

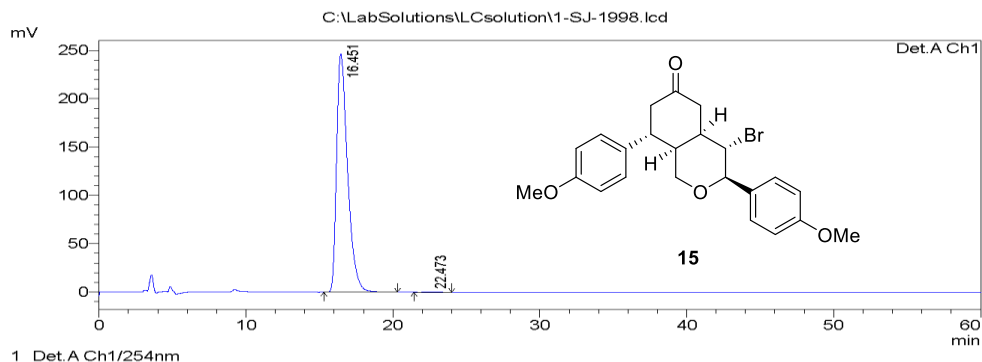

PeakTable

| Peak# | Ret. Time | Area     | Height | Area %  | Height % |
|-------|-----------|----------|--------|---------|----------|
| 1     | 16.451    | 12801081 | 246231 | 99.930  | 99.925   |
| 2     | 22.473    | 8970     | 186    | 0.070   | 0.075    |
| Total |           | 12810051 | 246417 | 100.000 | 100.000  |

## ==== Shimadzu LCsolution Analysis Report ====

C:\LabSolutions\LCsolution\I-NS-122.lcd

```

Acquired by       : Admin
Sample Name      : I-NS-122-AD-H
Sample ID       :
Vial #          :
Injection Volume  : 1 uL
Data File Name   : I-NS-122.lcd
Method File Name : ChiralPak AD-H-10%-0.5 mL-254nm.lcm
Batch File Name  :
Report File Name : Default.lcr
Data Acquired    : 4/12/2021 1:37:05 PM
Data Processed   : 4/12/2021 2:02:12 PM
    
```

### <Chromatogram>

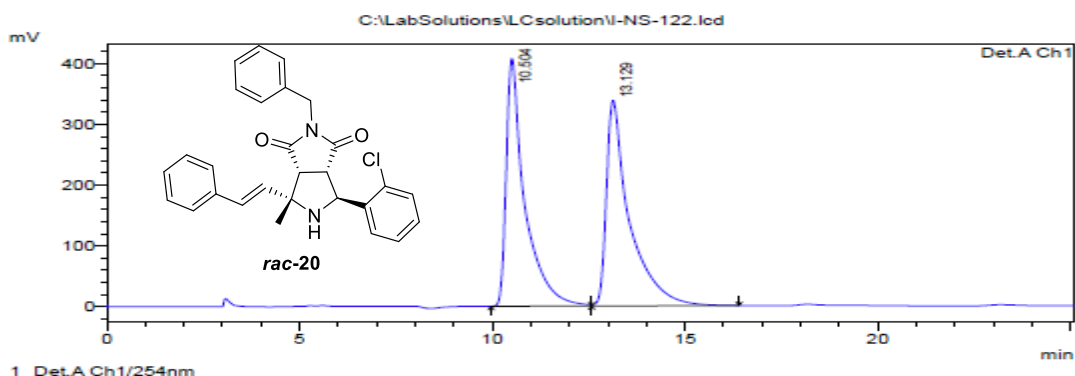

PeakTable

| Peak# | Ret. Time | Area     | Height | Area %  | Height % |
|-------|-----------|----------|--------|---------|----------|
| 1     | 10.504    | 13561243 | 407062 | 49.177  | 54.652   |
| 2     | 13.129    | 14015298 | 337759 | 50.823  | 45.348   |
| Total |           | 27576541 | 744821 | 100.000 | 100.000  |

## ==== Shimadzu LCsolution Analysis Report ====

C:\LabSolutions\LCsolution\I-NS-123 CHIRAL2.lcd

```

Acquired by       : Admin
Sample Name      : I-NS-123-AD-H
Sample ID       :
Vial #          :
Injection Volume  : 1 uL
Data File Name   : I-NS-123 CHIRAL2.lcd
Method File Name : ChiralPak AD-H-10%-0.5 mL-254nm.lcm
Batch File Name  :
Report File Name : Default.lcr
Data Acquired    : 4/12/2021 2:38:01 PM
Data Processed   : 4/12/2021 3:01:06 PM
    
```

### <Chromatogram>

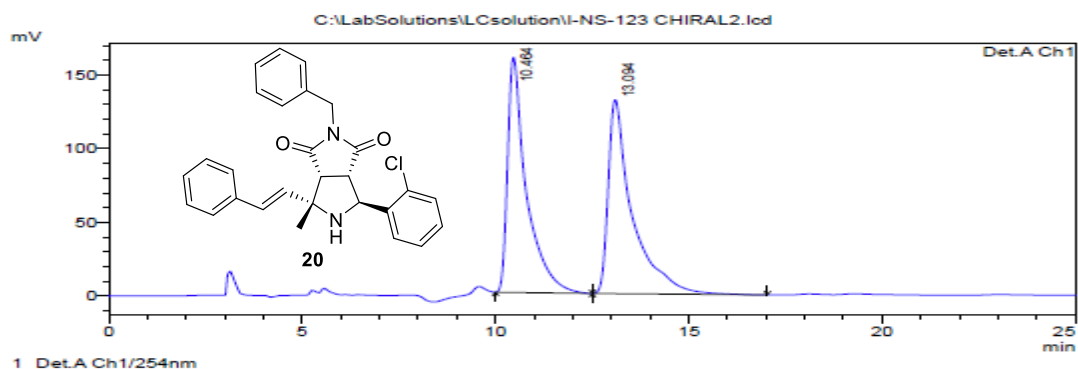

PeakTable

| Peak# | Ret. Time | Area     | Height | Area %  | Height % |
|-------|-----------|----------|--------|---------|----------|
| 1     | 10.464    | 5396098  | 159618 | 48.578  | 54.783   |
| 2     | 13.094    | 5711899  | 131744 | 51.422  | 45.217   |
| Total |           | 11107997 | 291361 | 100.000 | 100.000  |
